# Supplementary material for: Selective androgen receptor degrader (SARD) to overcome antiandrogen resistance in castration-resistant prostate cancer
Source: eLife journal article supplement (doi:10.7554/elife.70700), 2023-01-19

**Figure 2**

**Figure 2D**

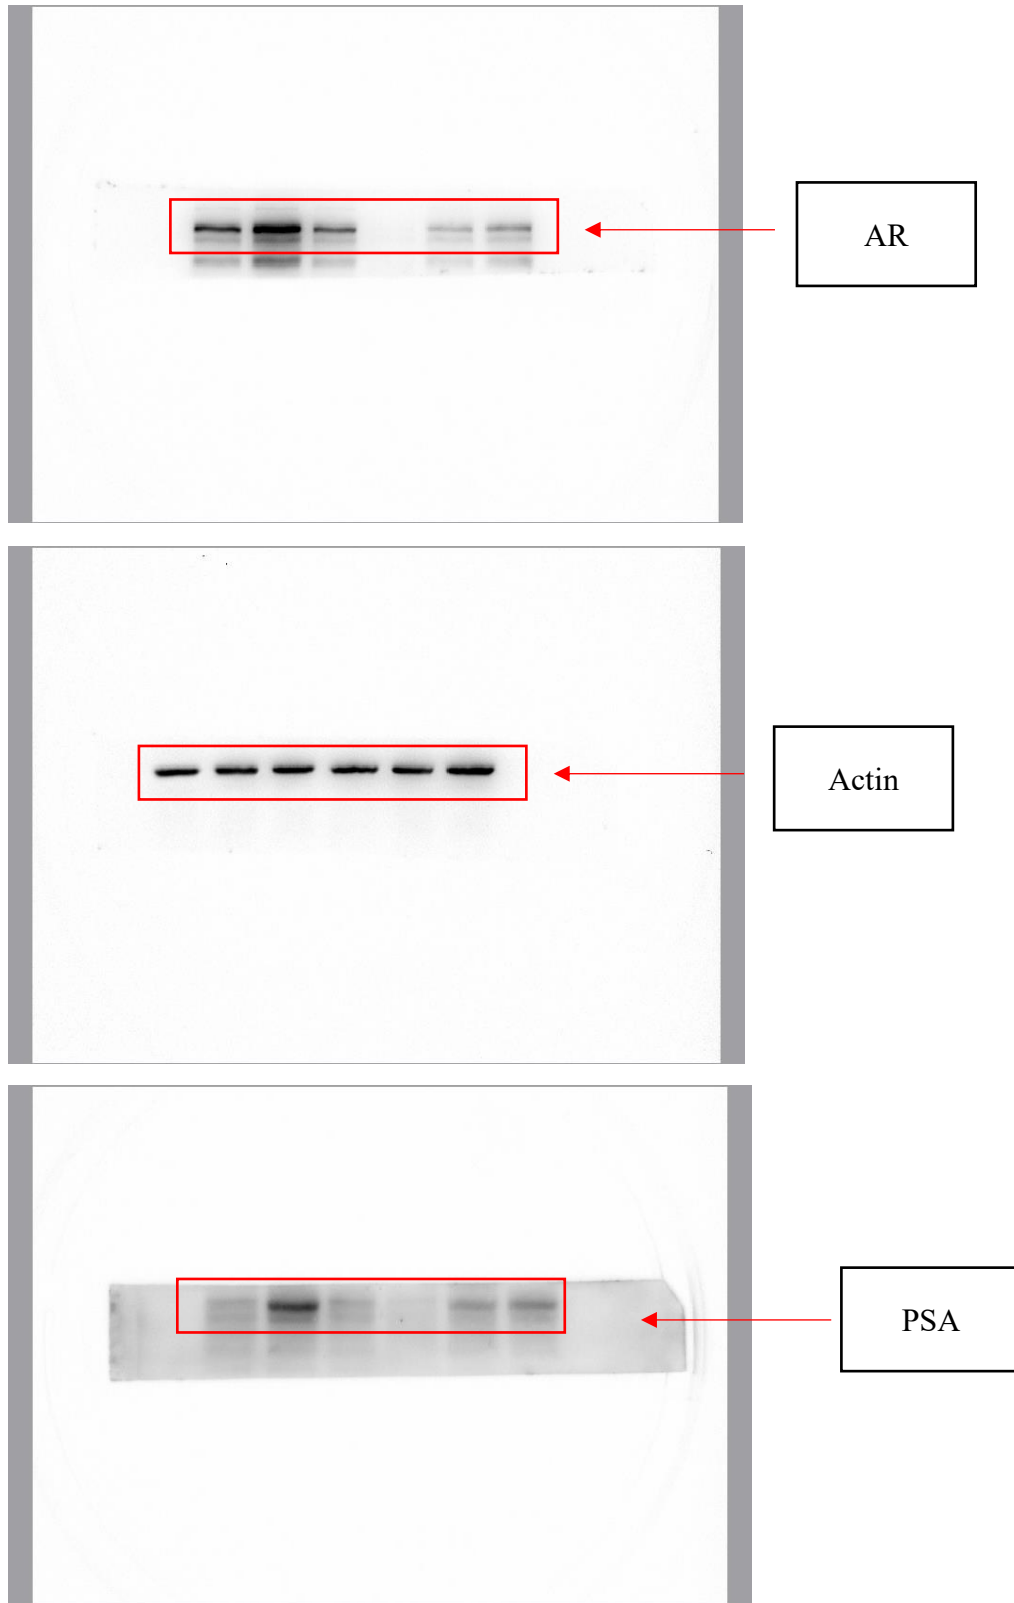

**Figure 2E**

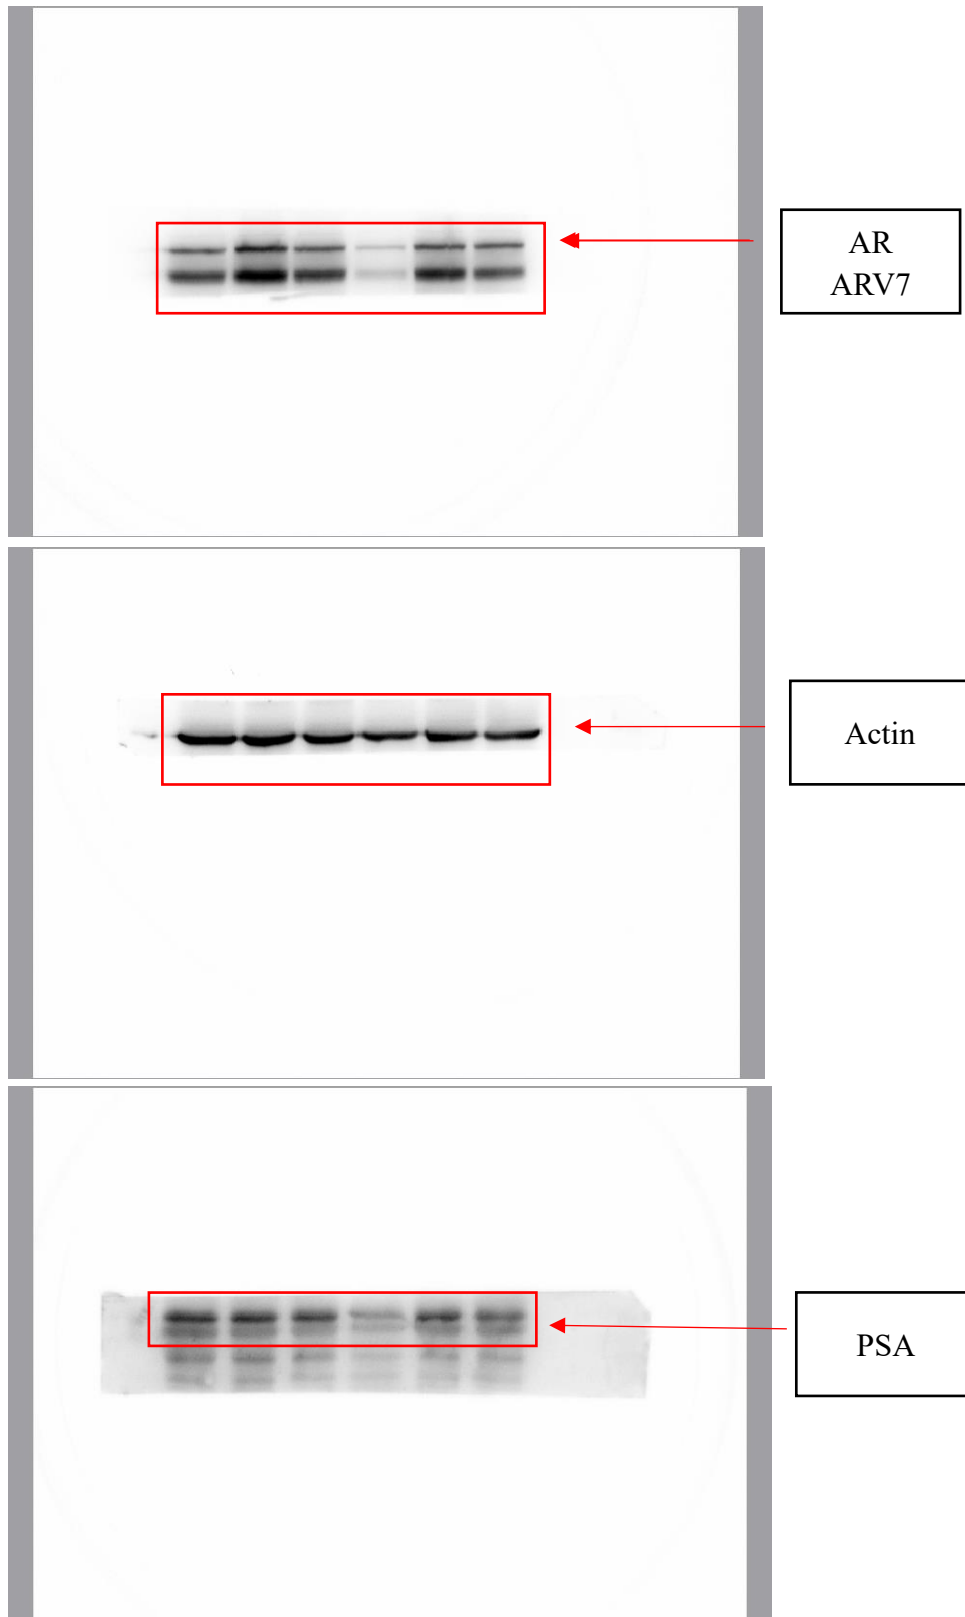

**Figure 2F**

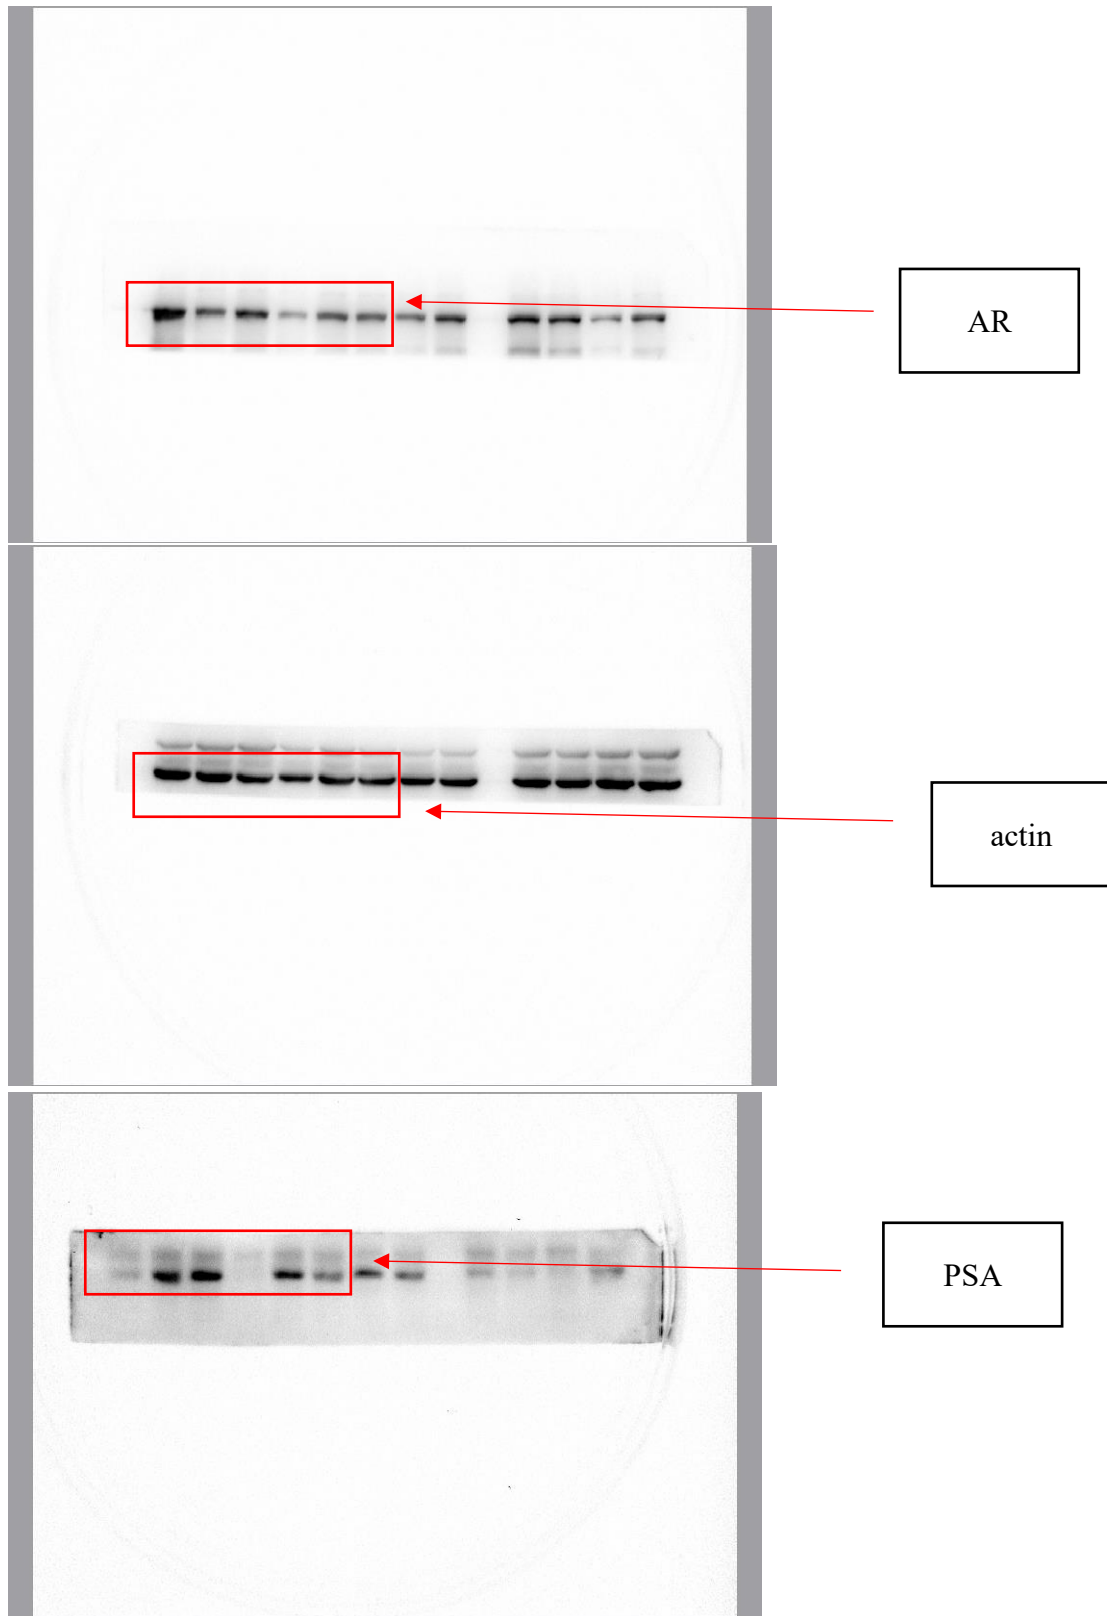

**Figure 2G**

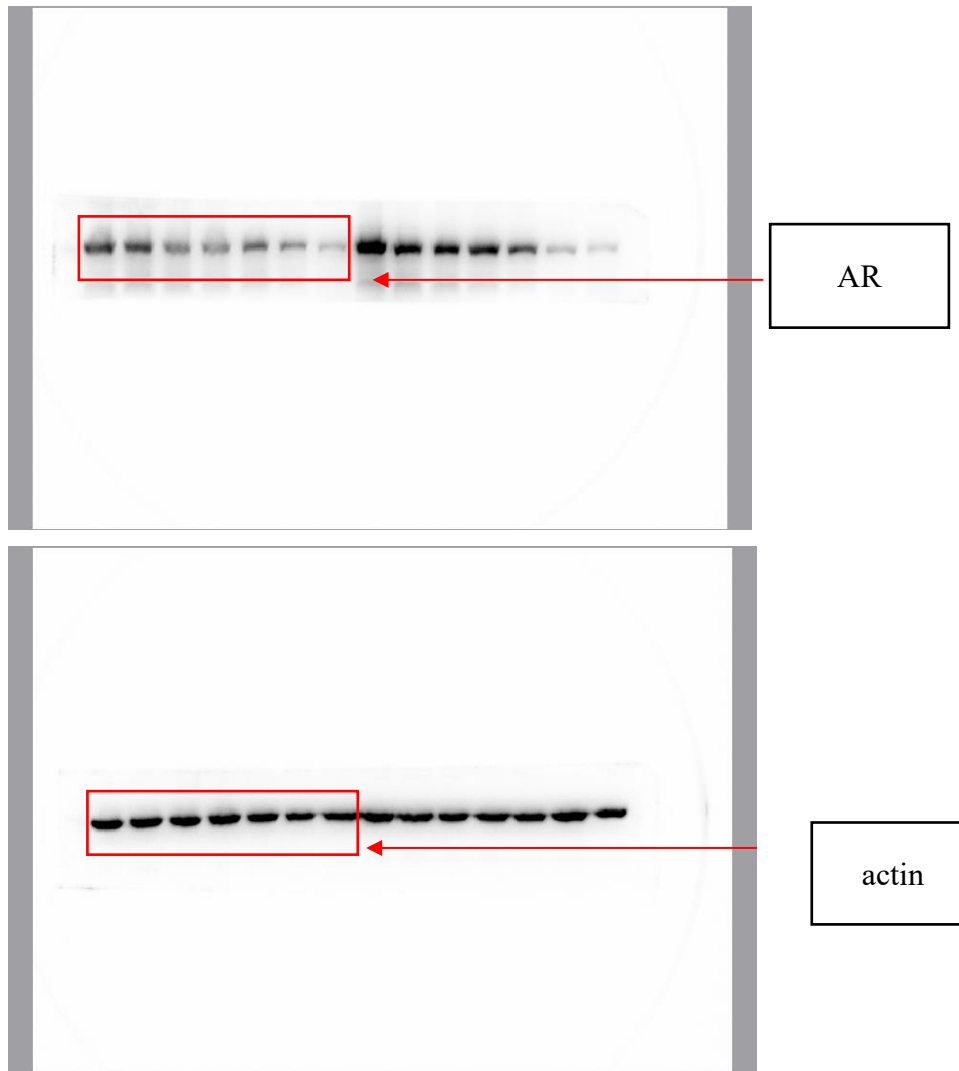

**Figure 2H**

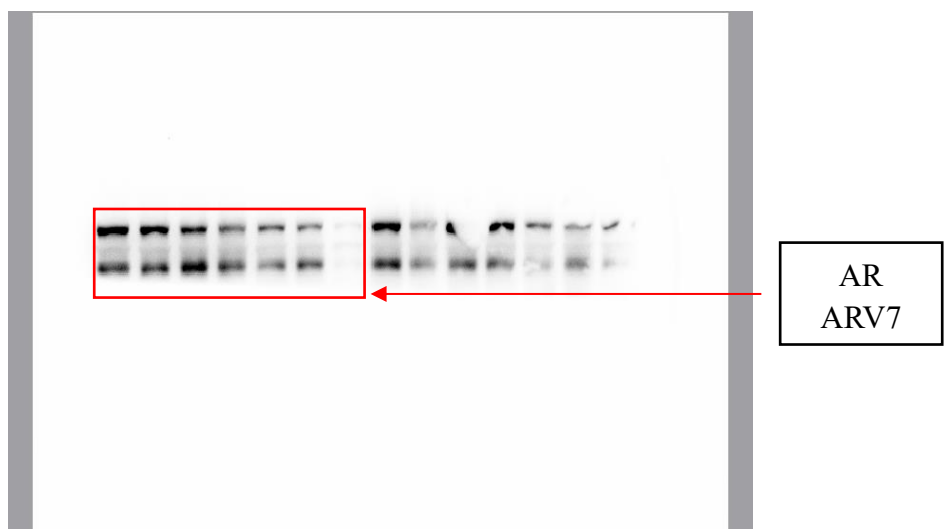

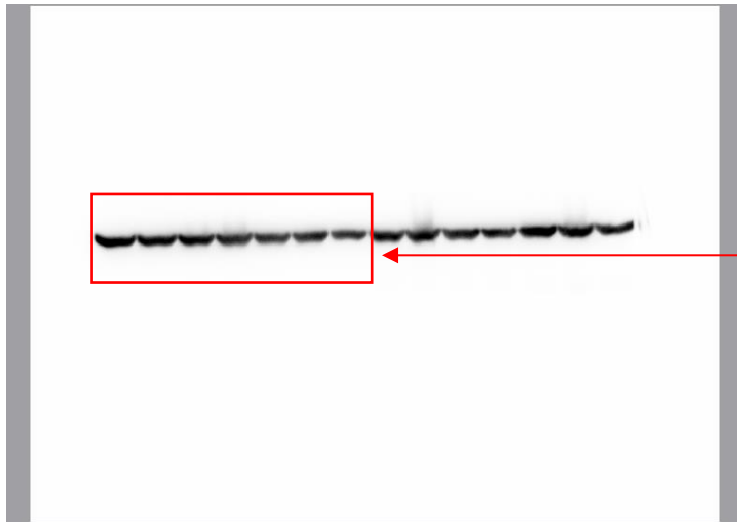

actin

**Figure 5**

**Figure 5A**

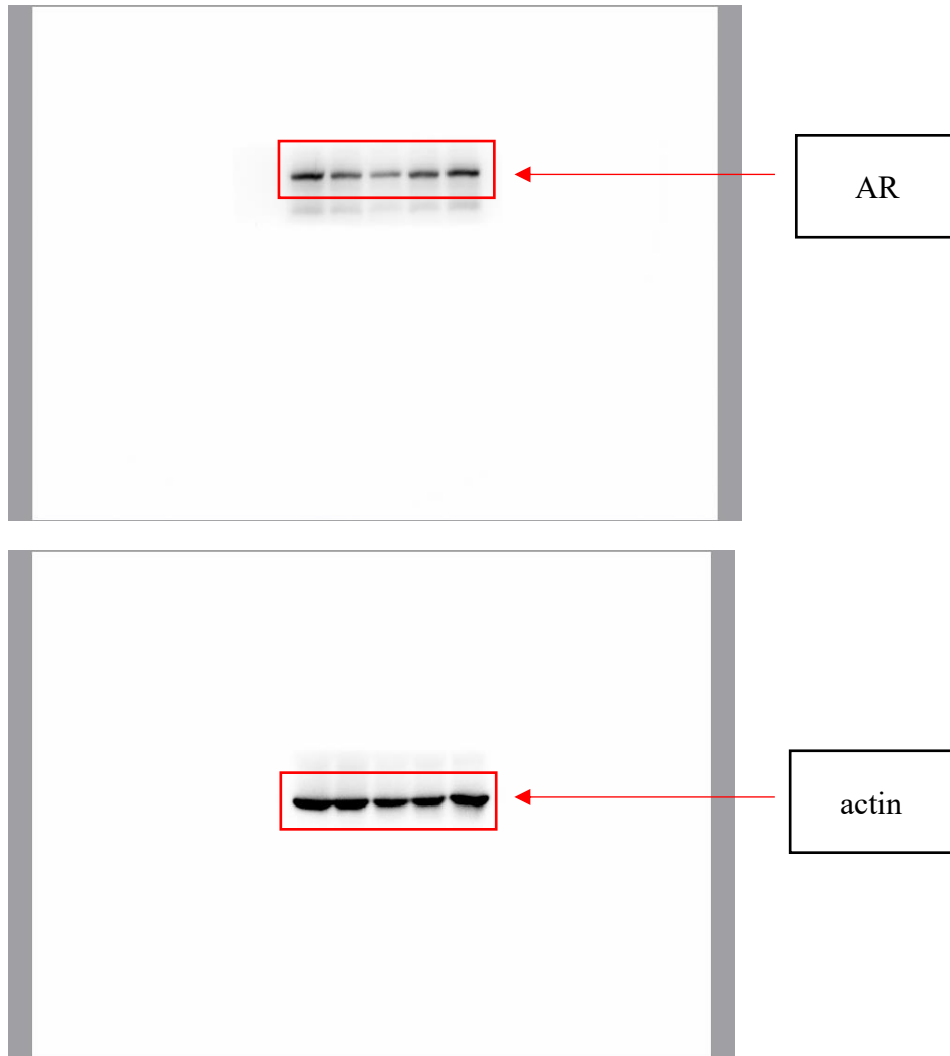

**Figure 5B**

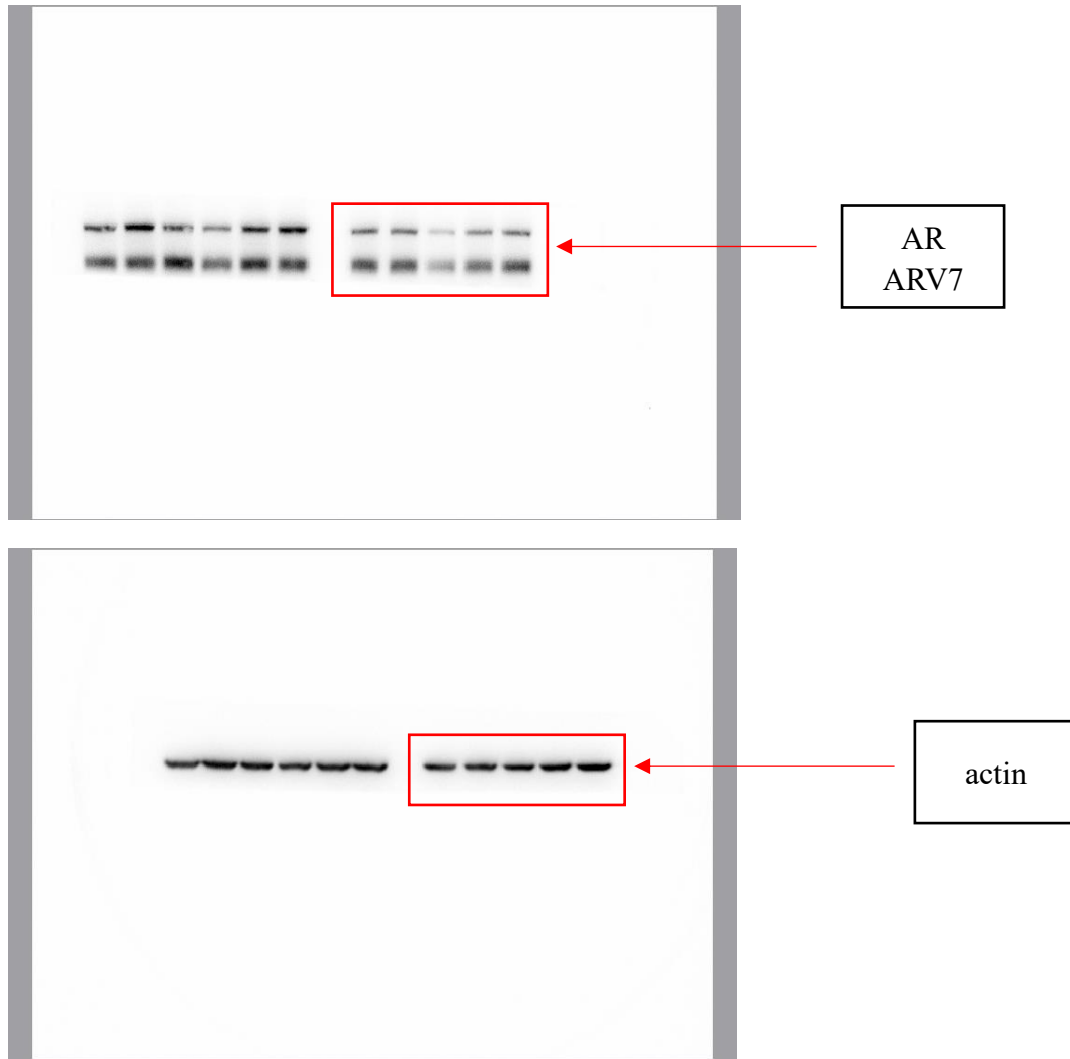

**Figure 5C**

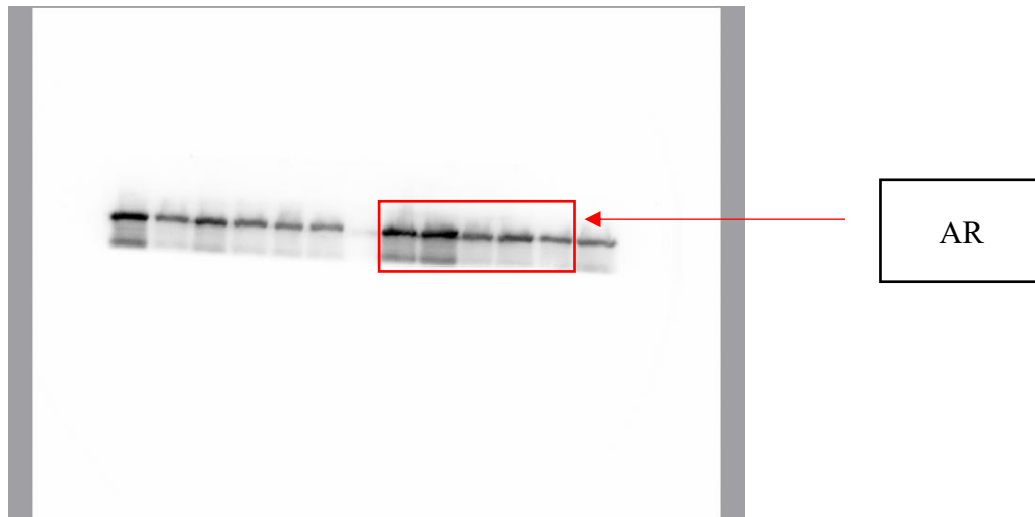

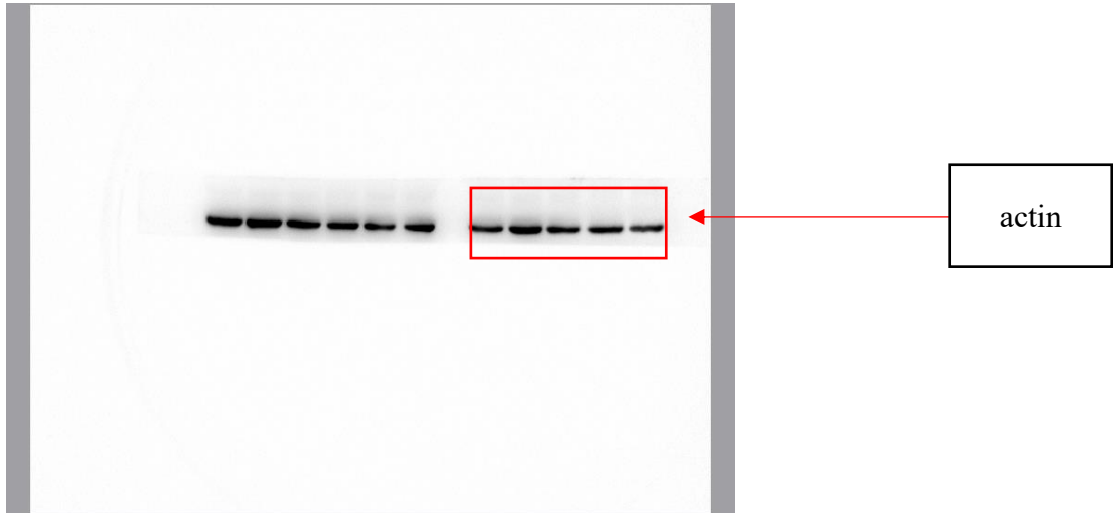

**Figure 5D**

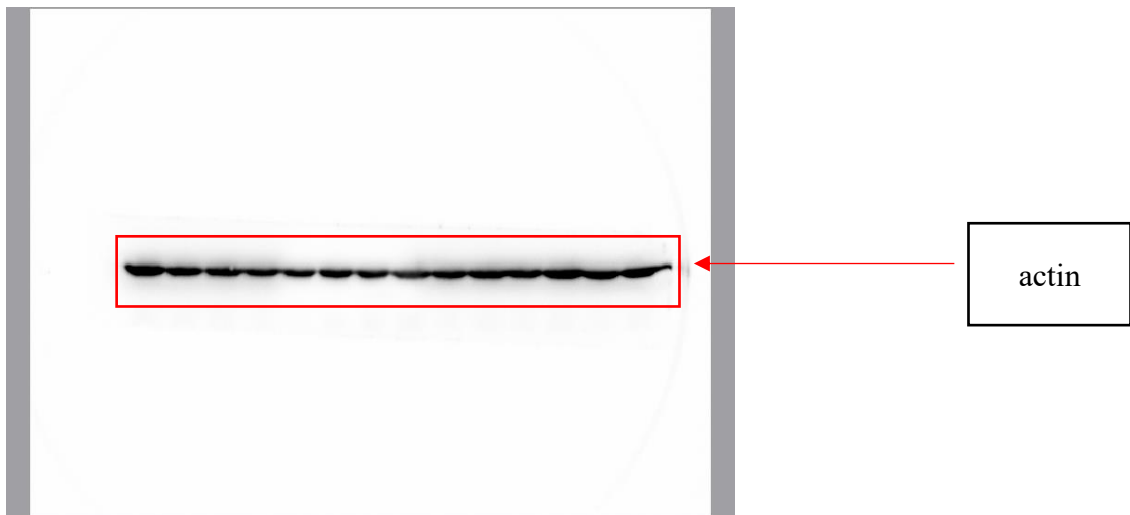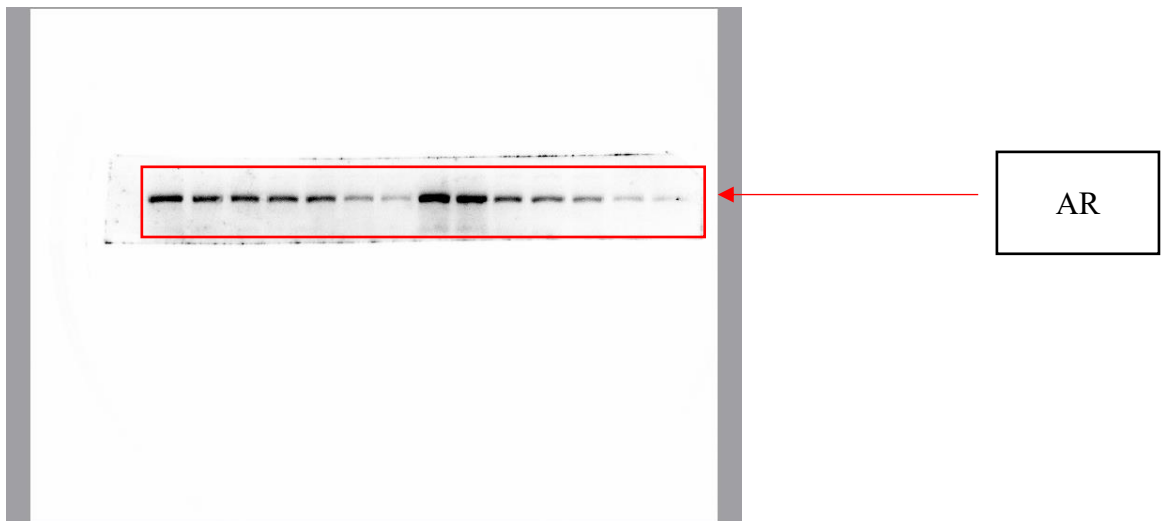



**Figure 5E**

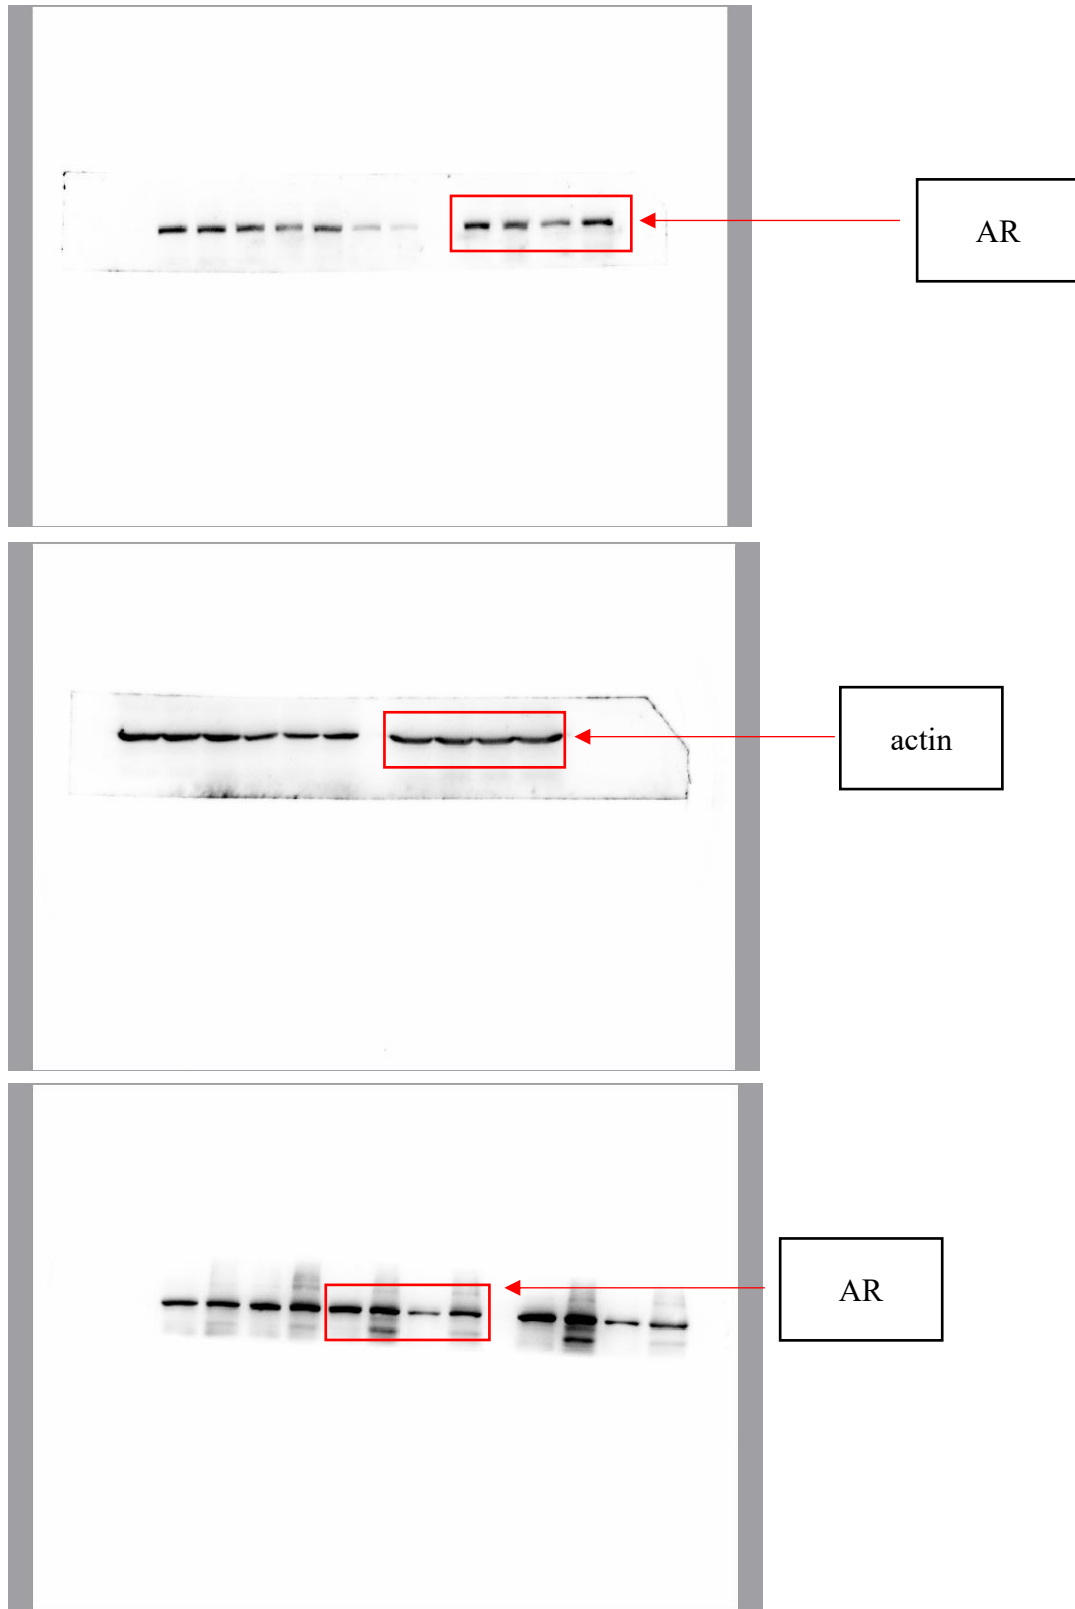

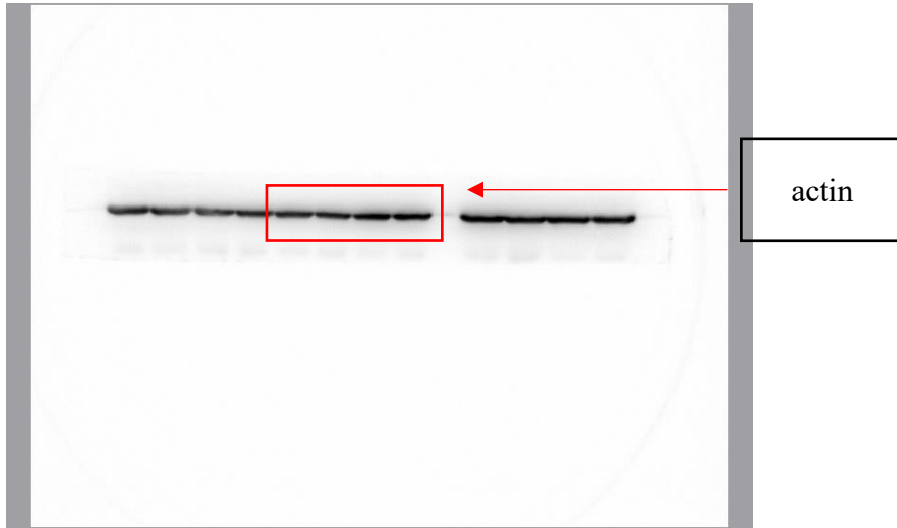

**Figure 5F**

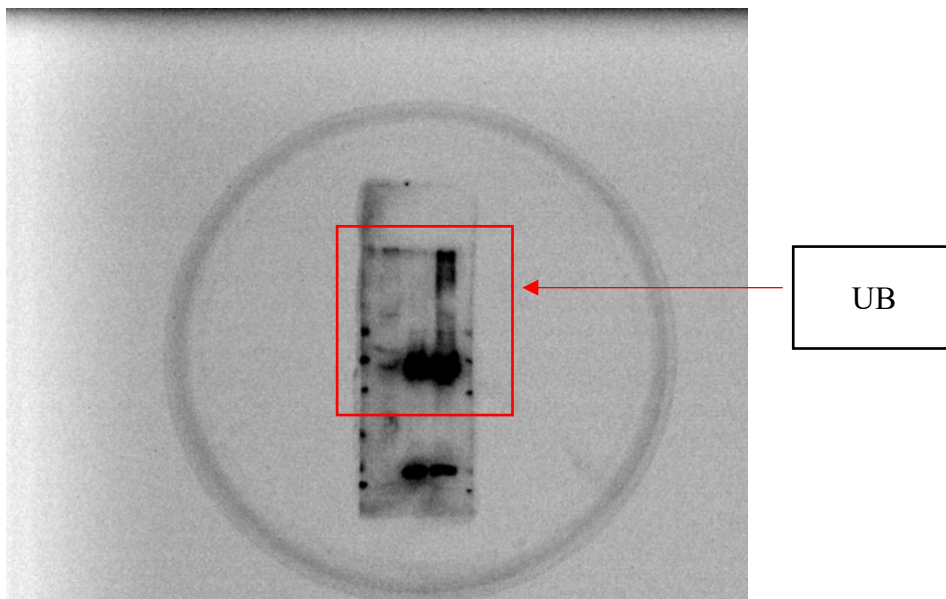

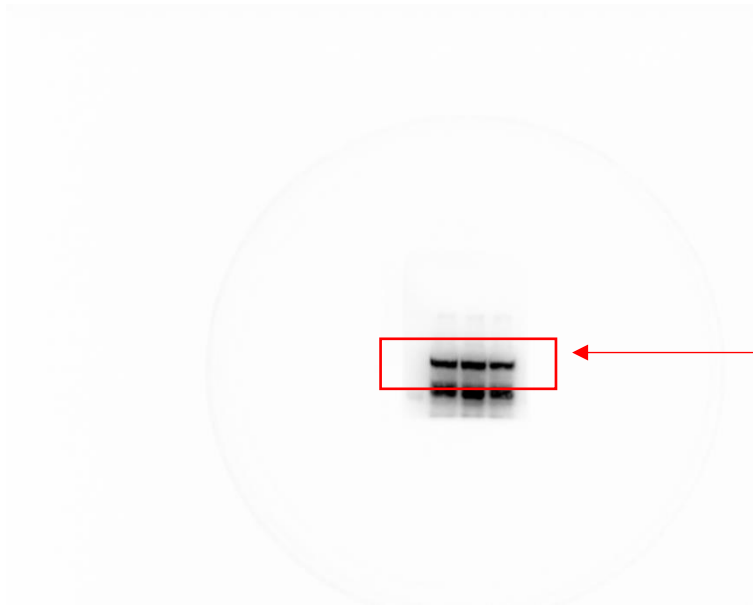

AR

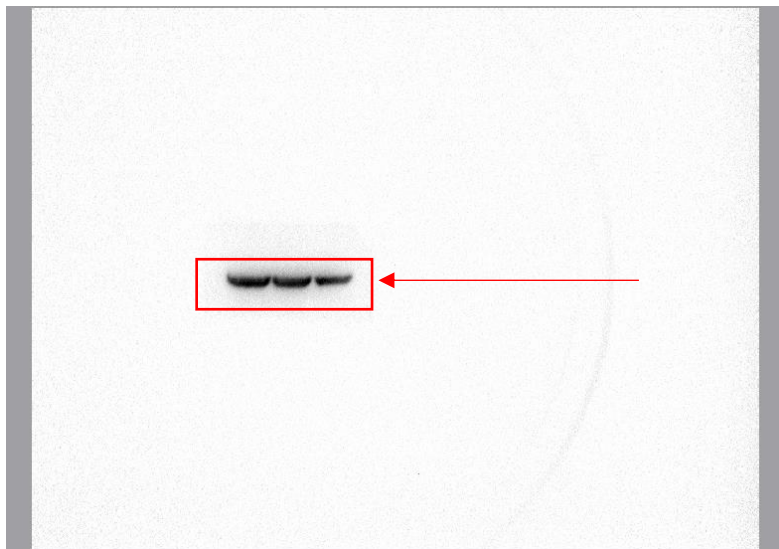

actin

**Figure 6**

**Figure 6D**

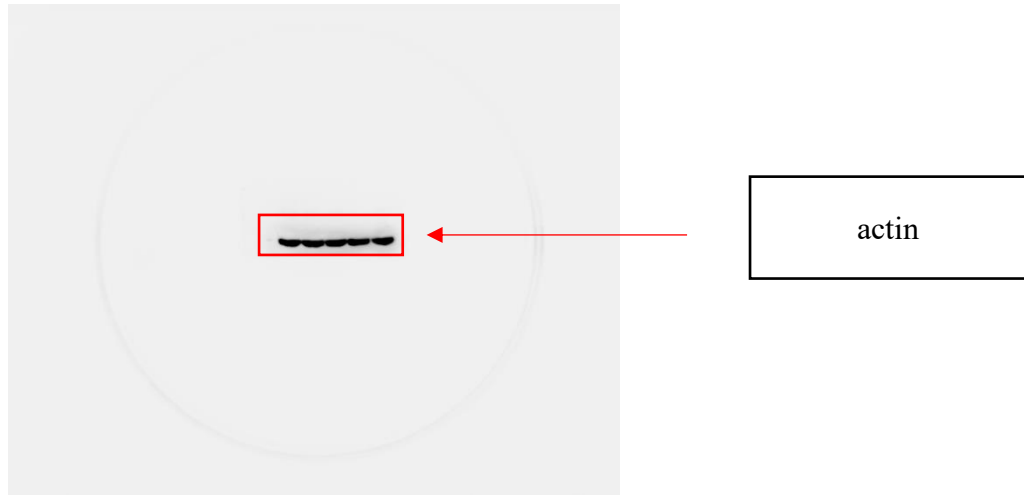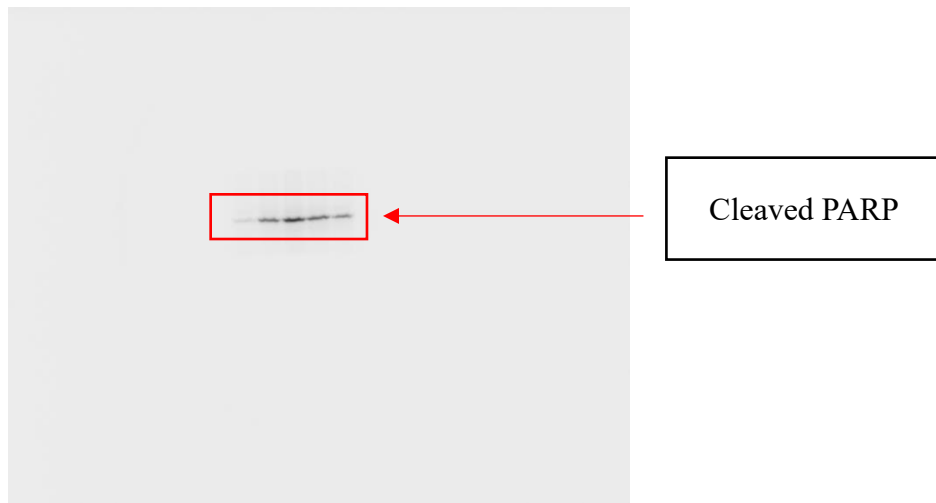

**Figure 6E**

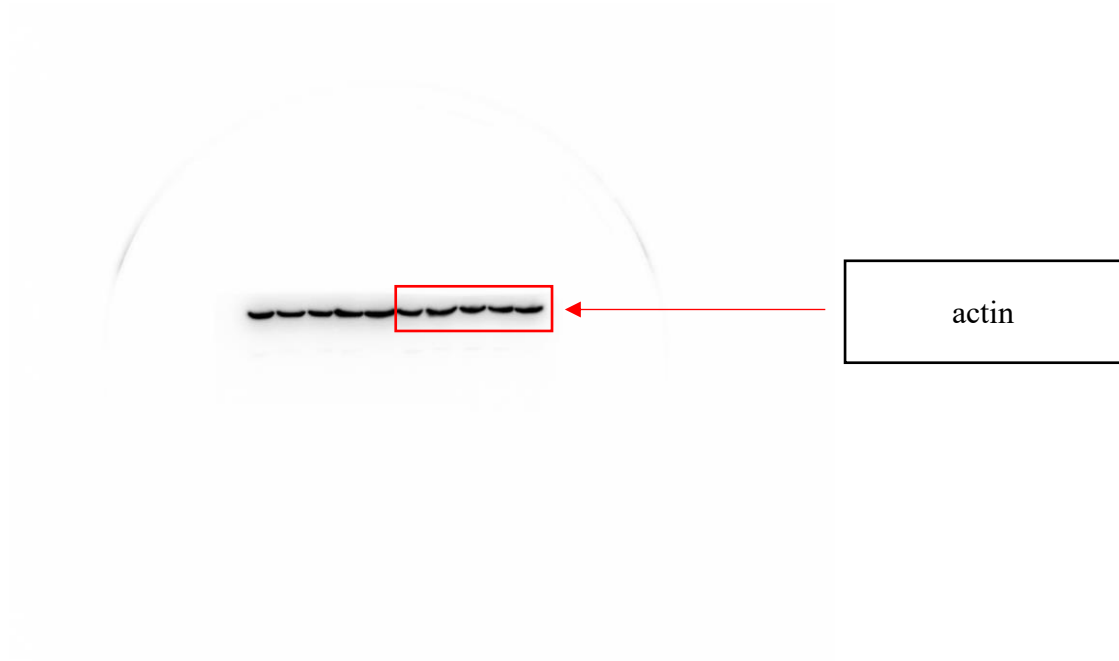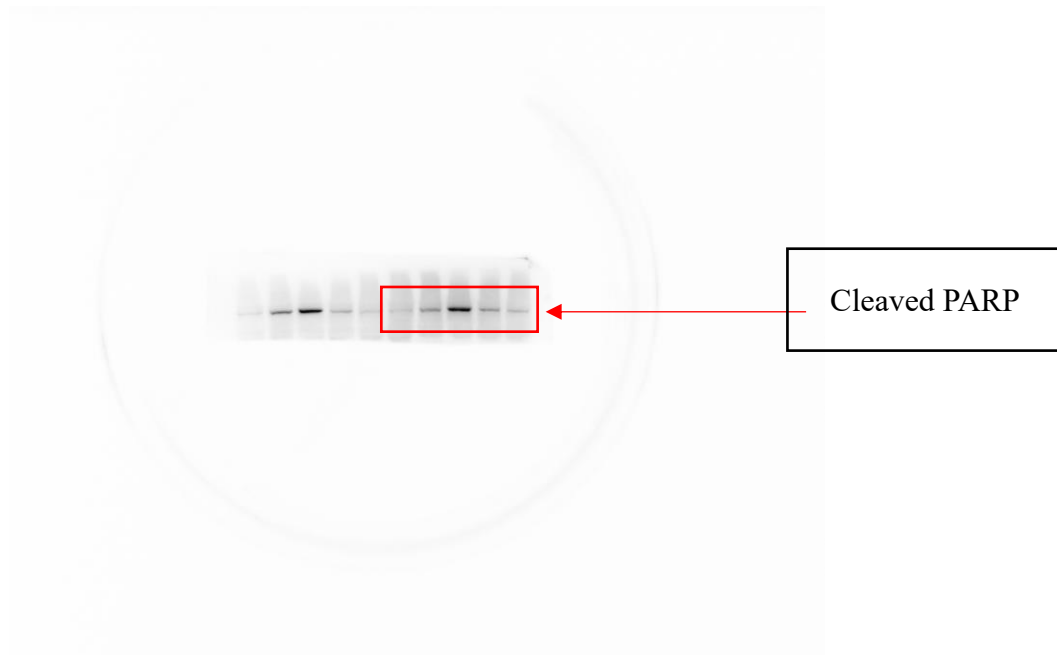

**Figure 7**

**Figure 7D**

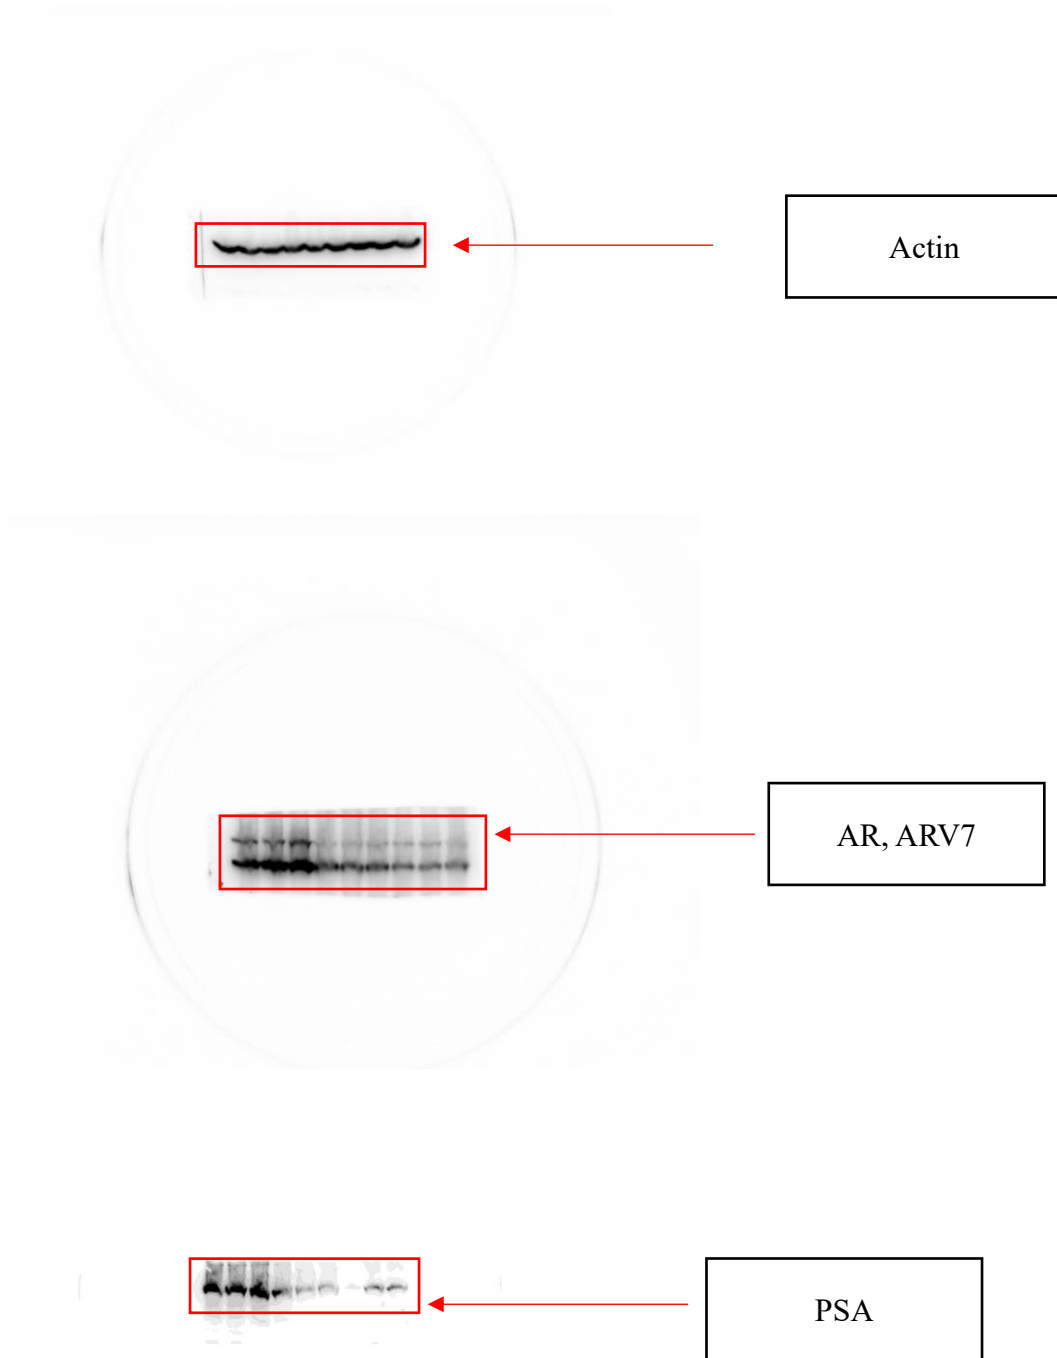

**Figure 8**

**Figure 8C**

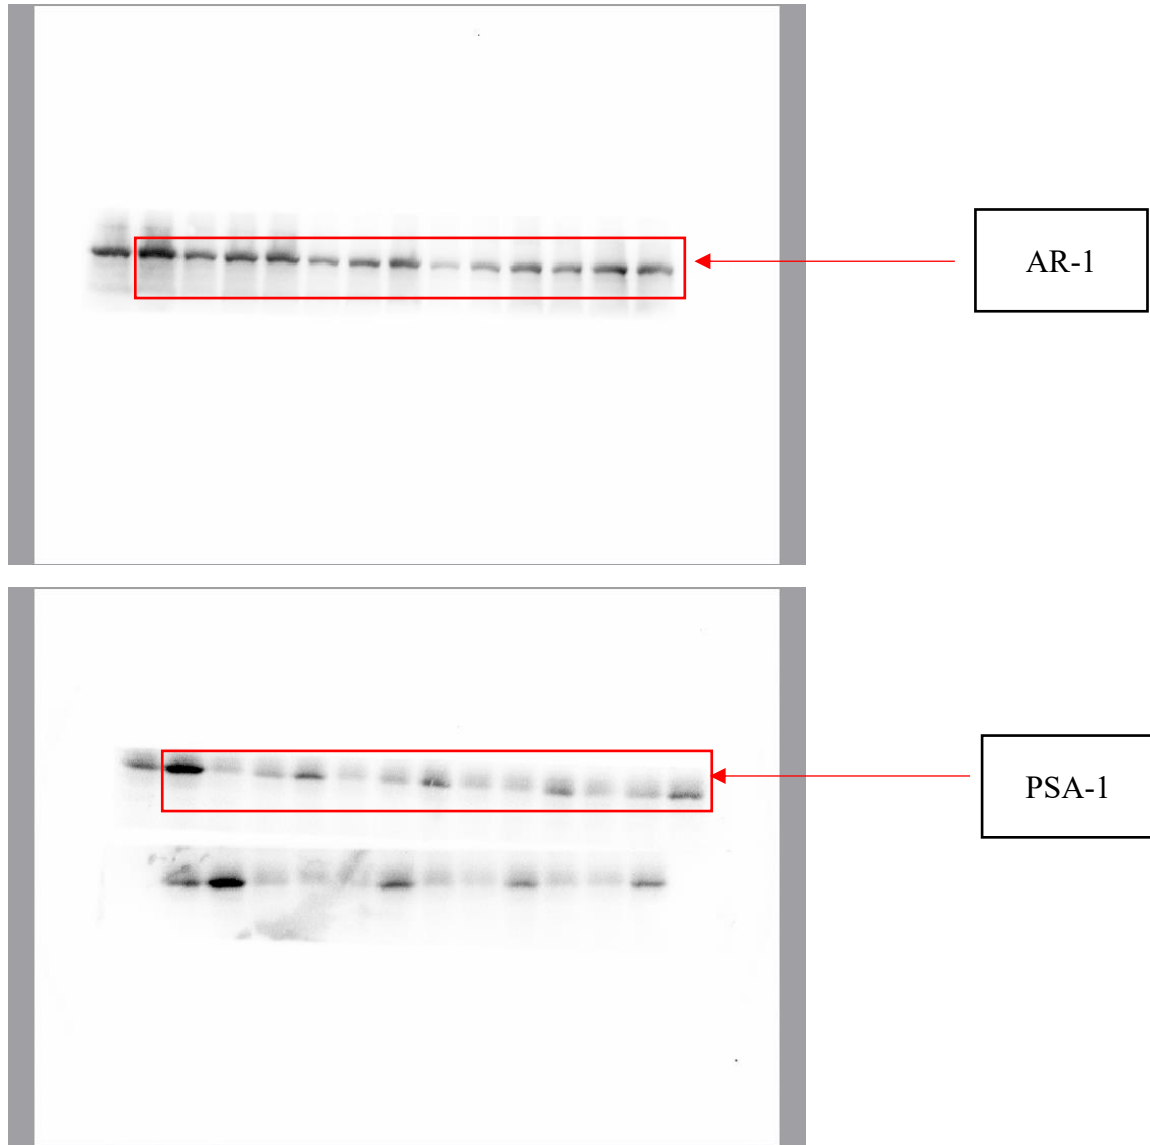

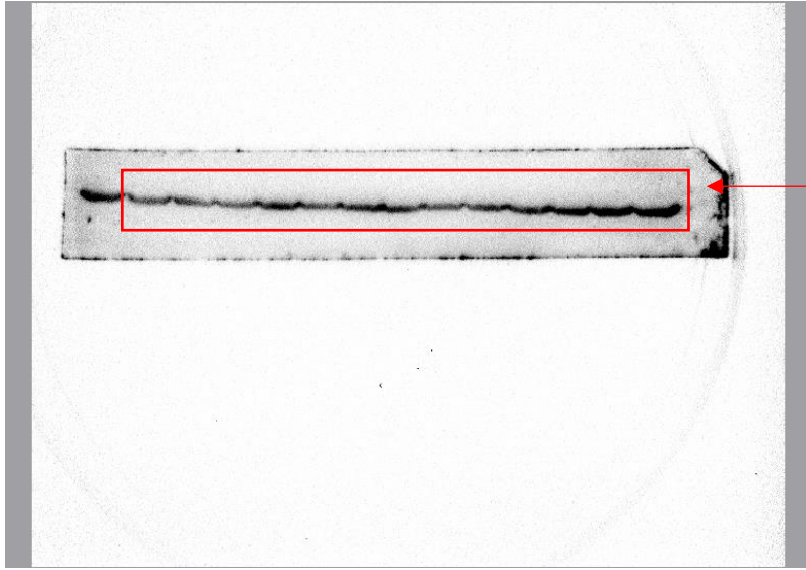

Actin-1

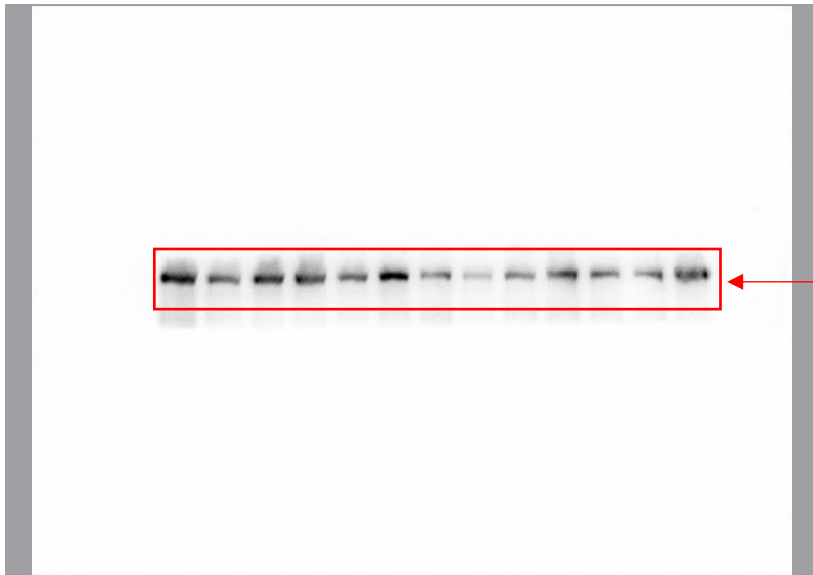

AR-2



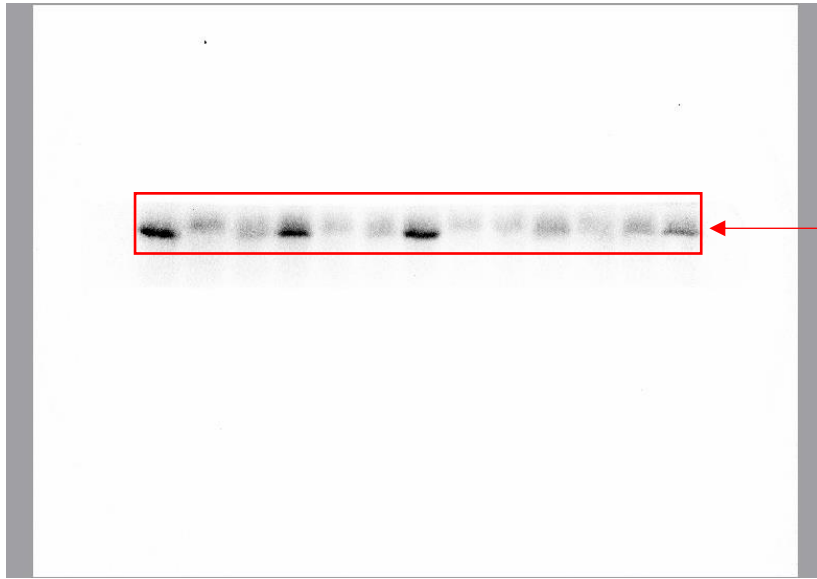

PSA-2

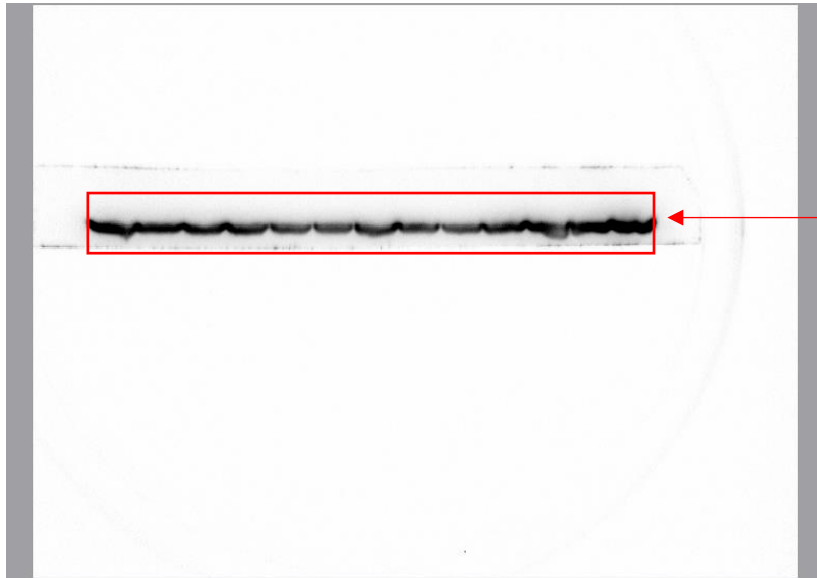

Actin-2

**Figure 2-figure supplement 3**

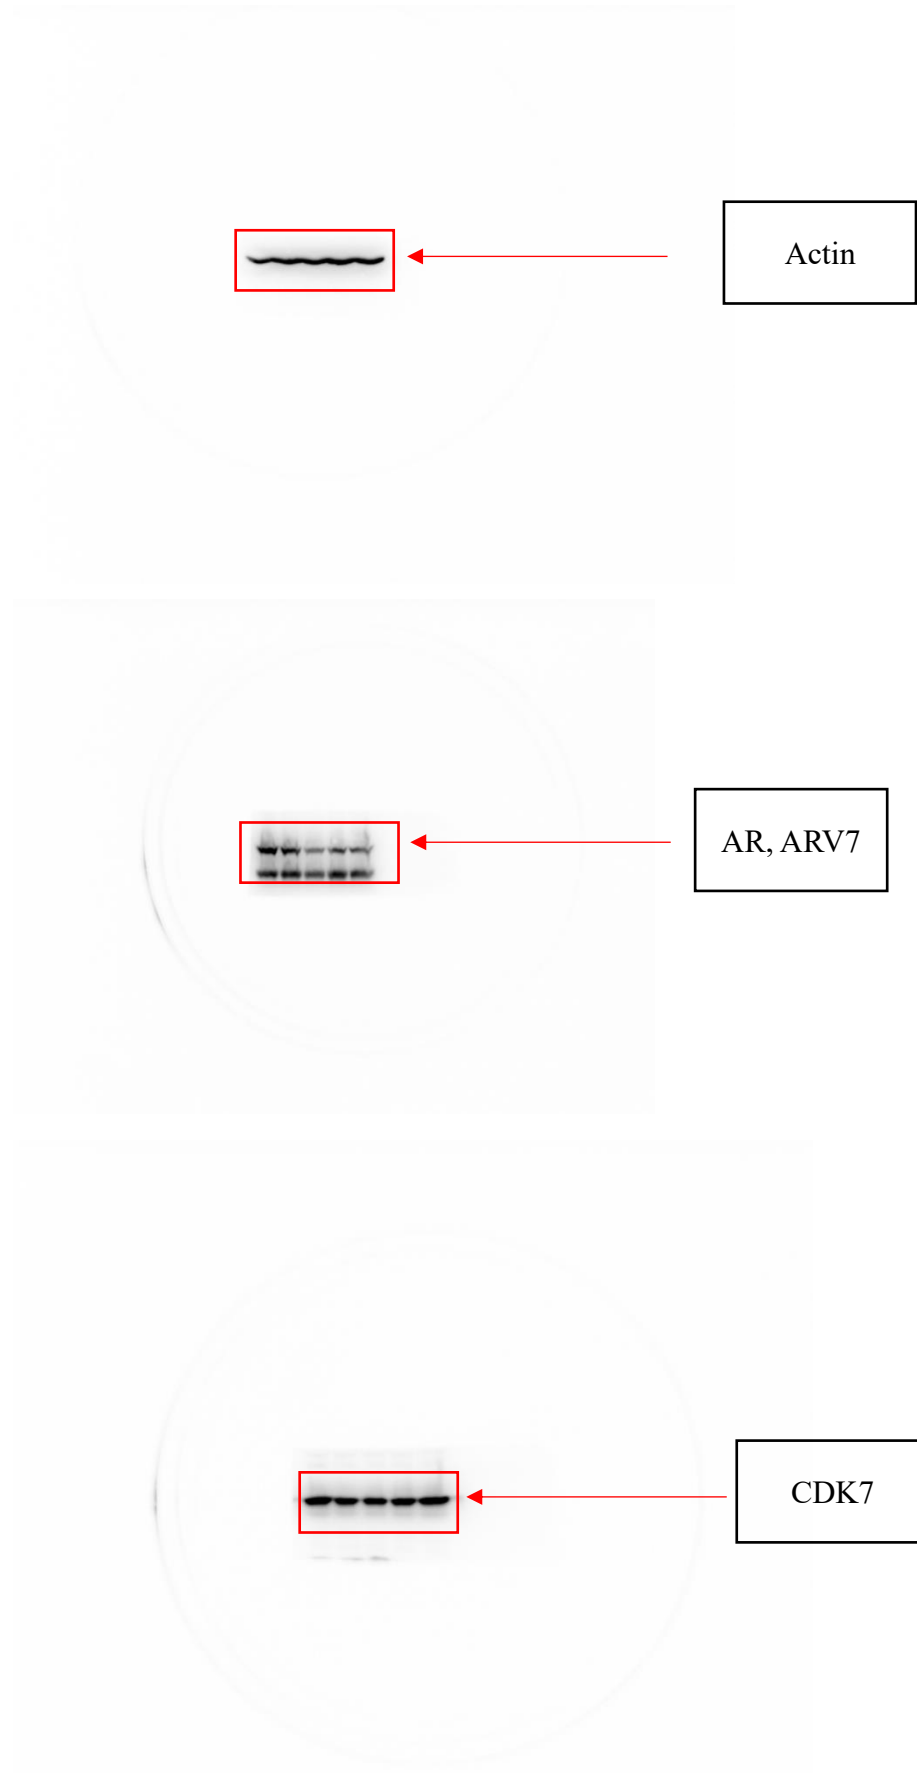

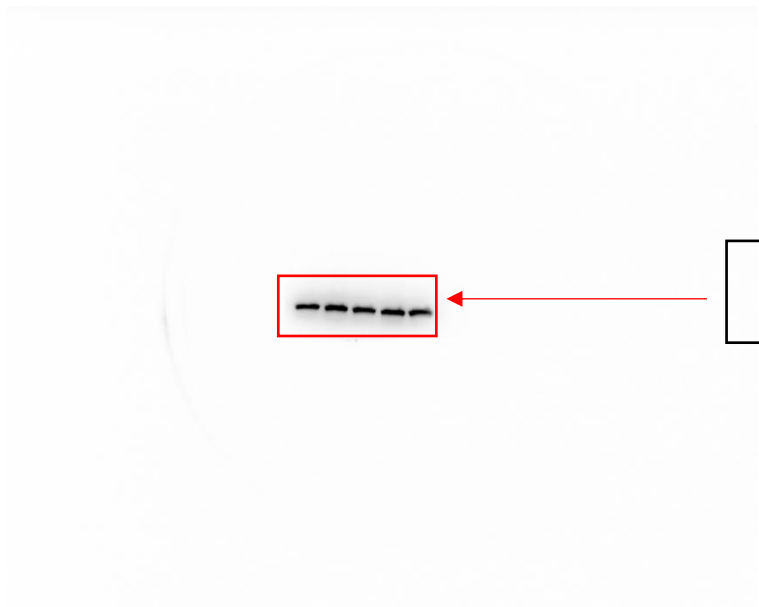

GR

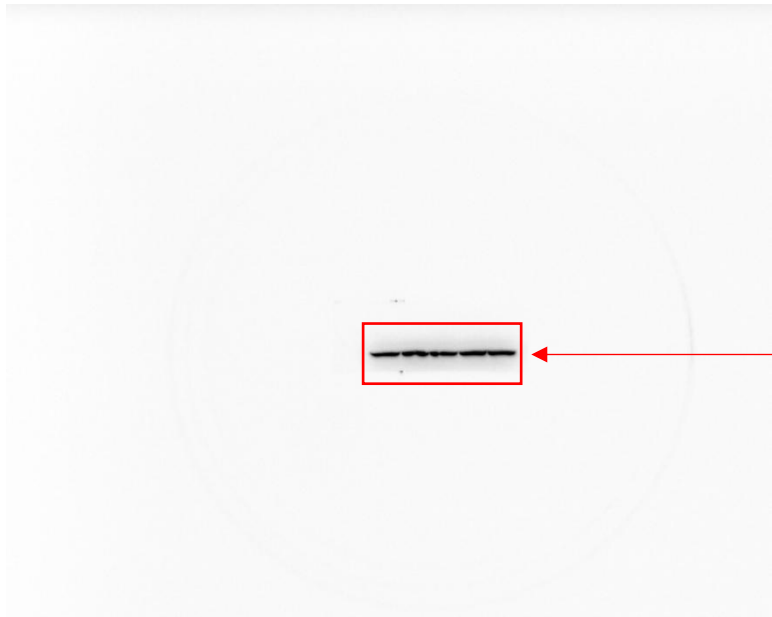

HSP90

**Figure 4-figure supplement 2**

**Figure 4-figure supplement 2A**

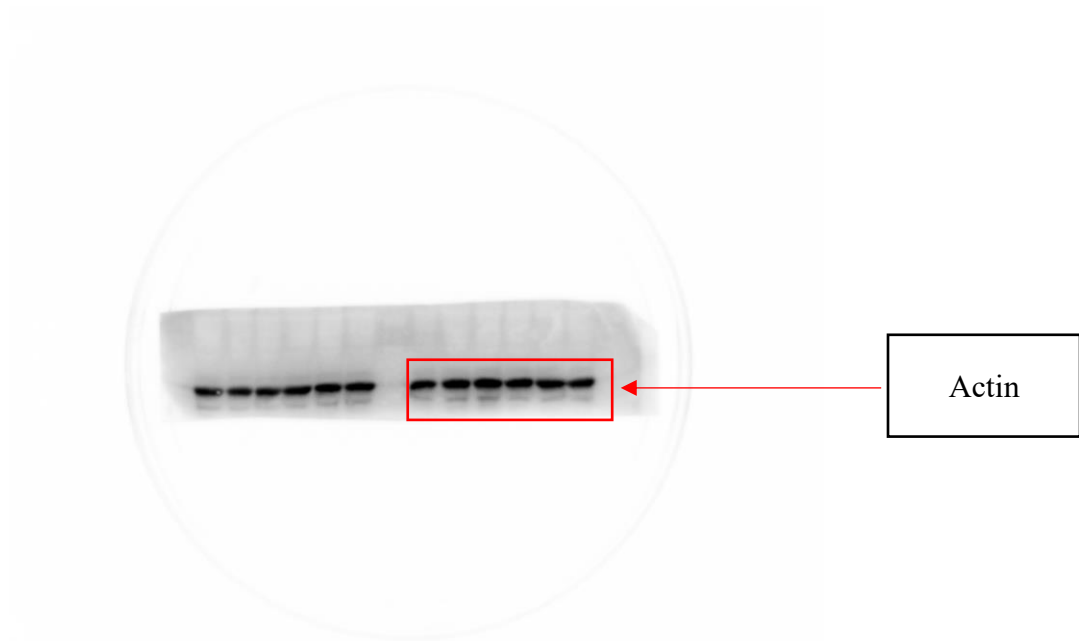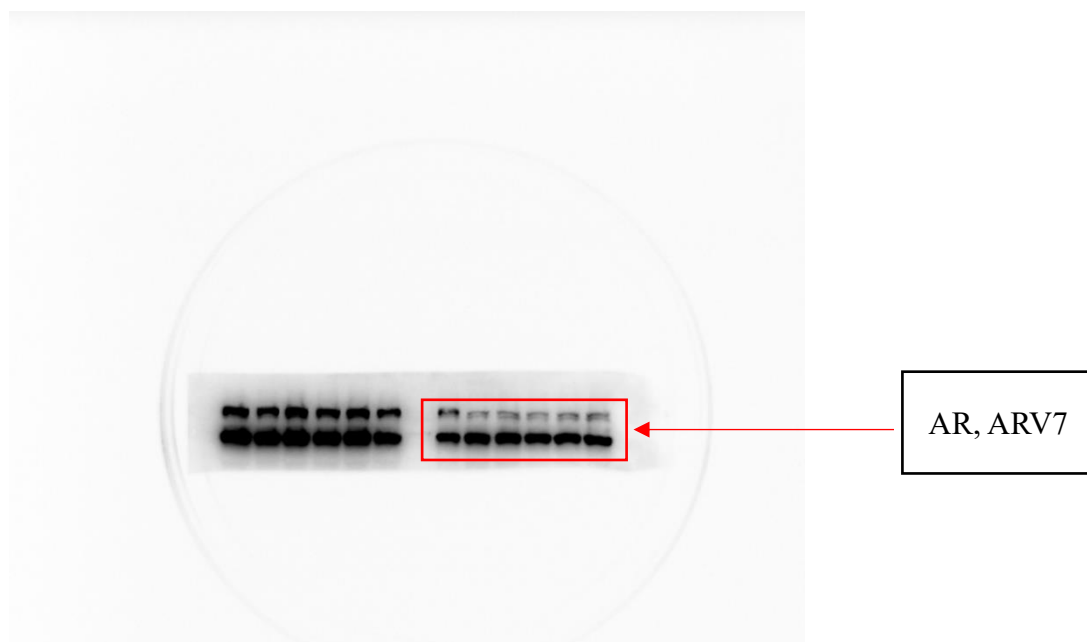

**Figure 4-figure supplement 2D**

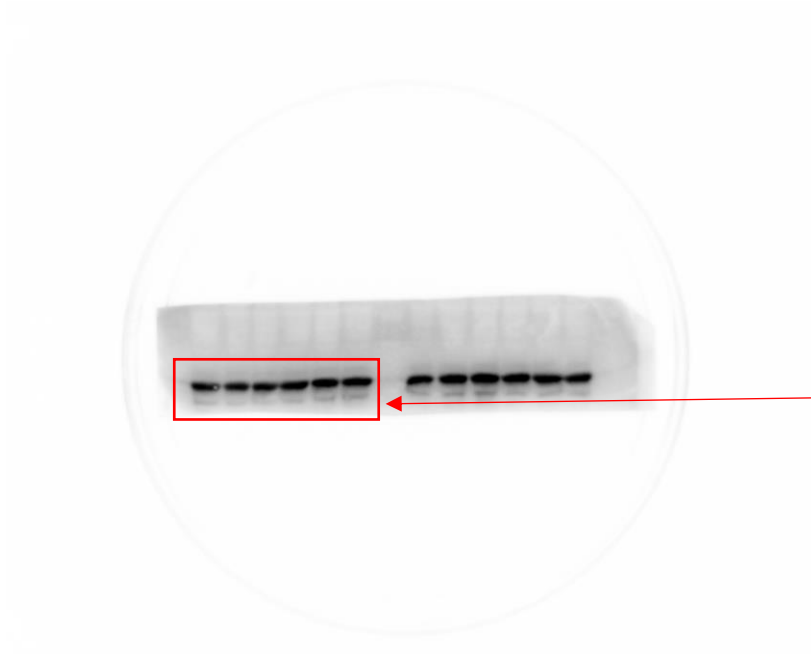

Actin

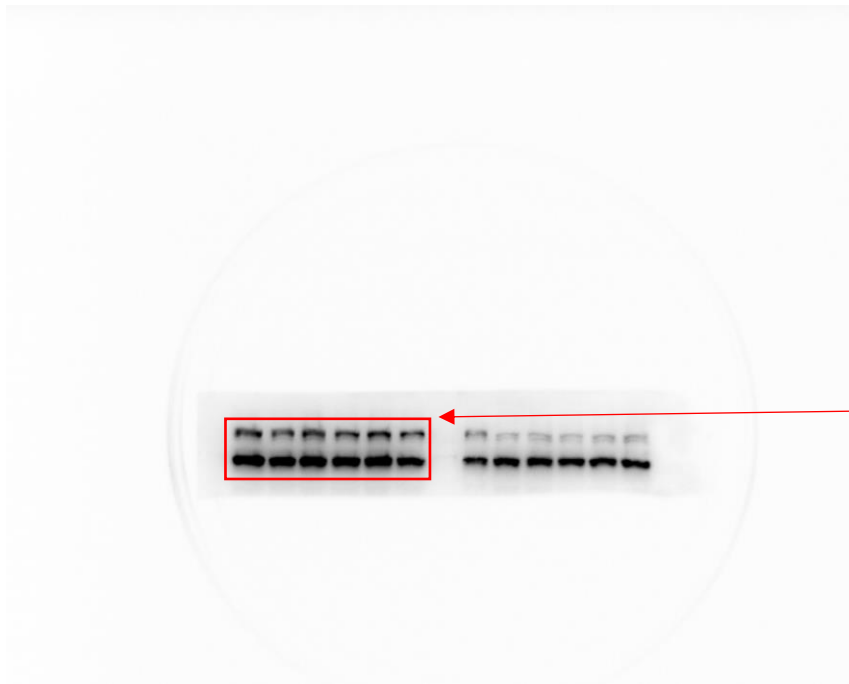

AR, ARV7

**Figure 6-figure supplement 1**

**Figure 6-figure supplement 1A**

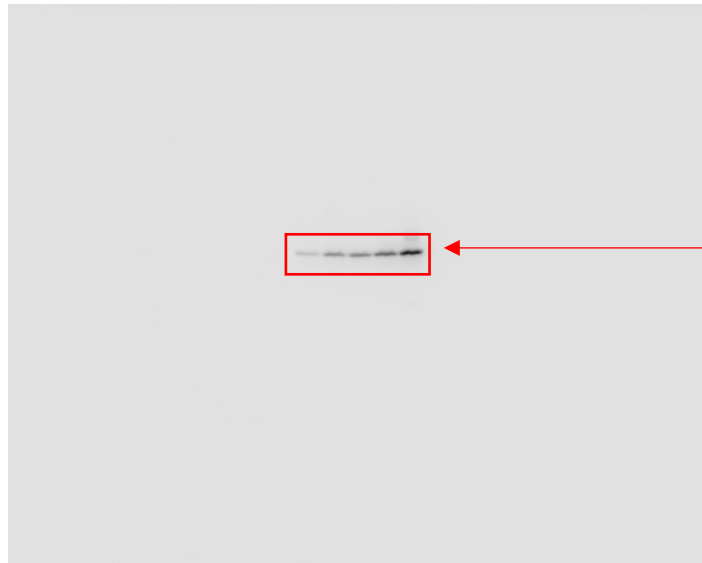

Cleaved PARP

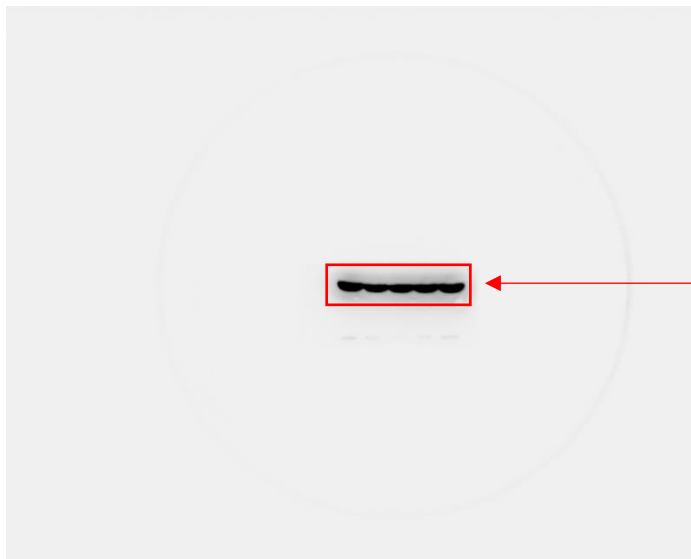

actin

**Figure 6-figure supplement 1B**

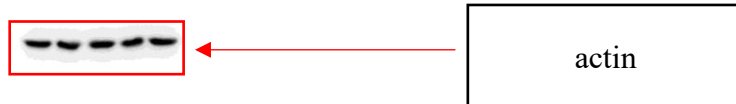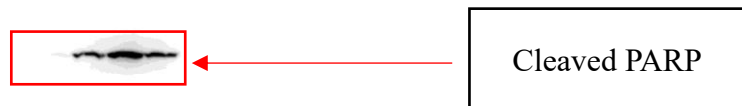

**Figure 6-figure supplement 1E**

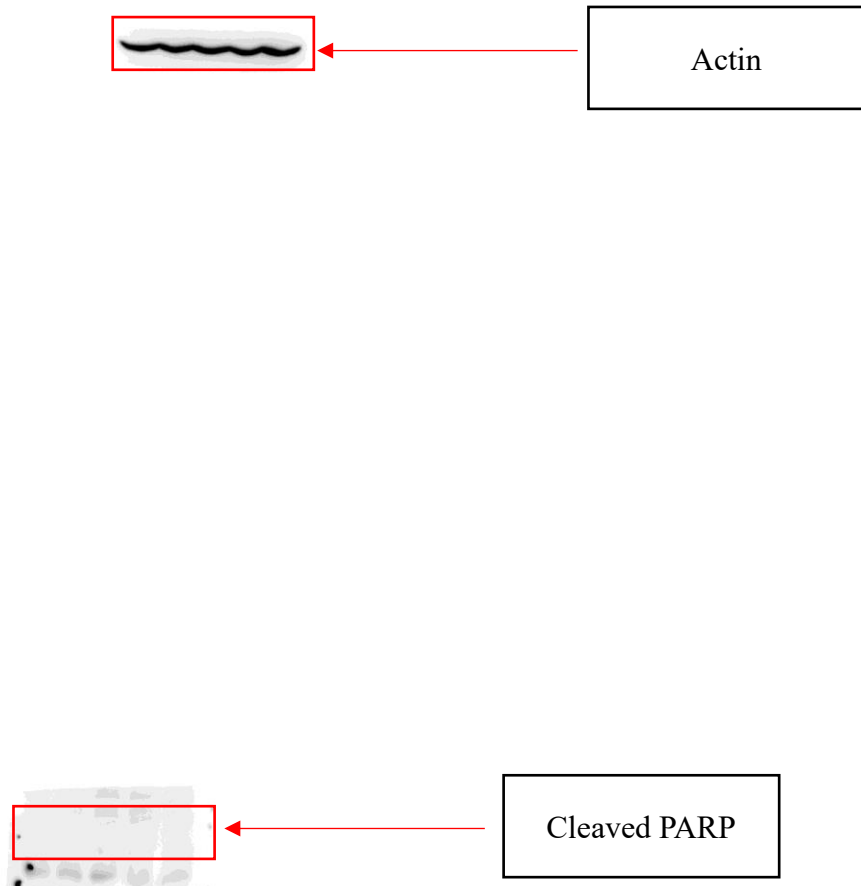



**Figure 8-figure supplement 2**

**Figure 8-figure supplement 2B**

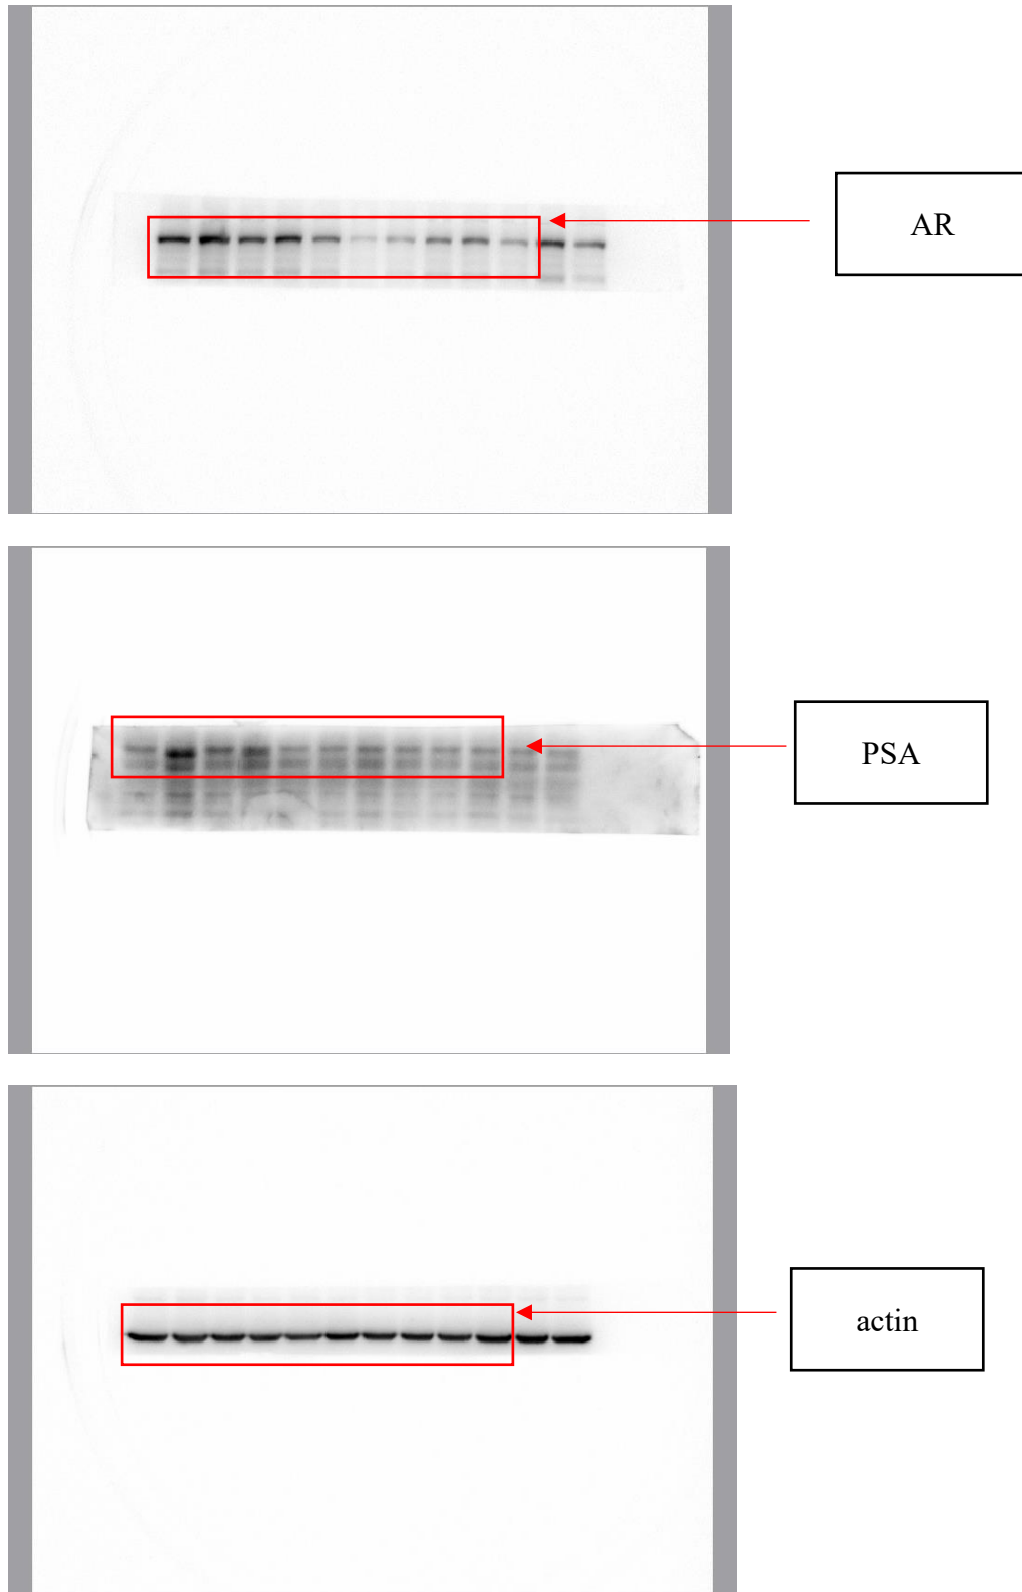

Supplement: data1 [file elife-70700-data1-v2.pdf]
