# Supplementary material for: Selective androgen receptor degrader (SARD) to overcome antiandrogen resistance in castration-resistant prostate cancer
Source: eLife journal article supplement (doi:10.7554/elife.70700), 2023-01-19

MaxPeak: 91.76% Ret\_Time: 0.751 min

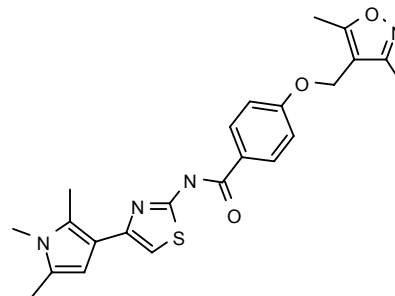

mw = 436,54

The method for the Gradient Sample using short rapid resolution HT Cartridge ZORBAX SB-C18 4.6x15 mm (p/n 821975-932). For testing purity of synteZ.

| # | Time  | Area% |
|---|-------|-------|
| 1 | 0.638 | 5.77  |
| 2 | 0.751 | 91.76 |
| 3 | 0.804 | 2.47  |

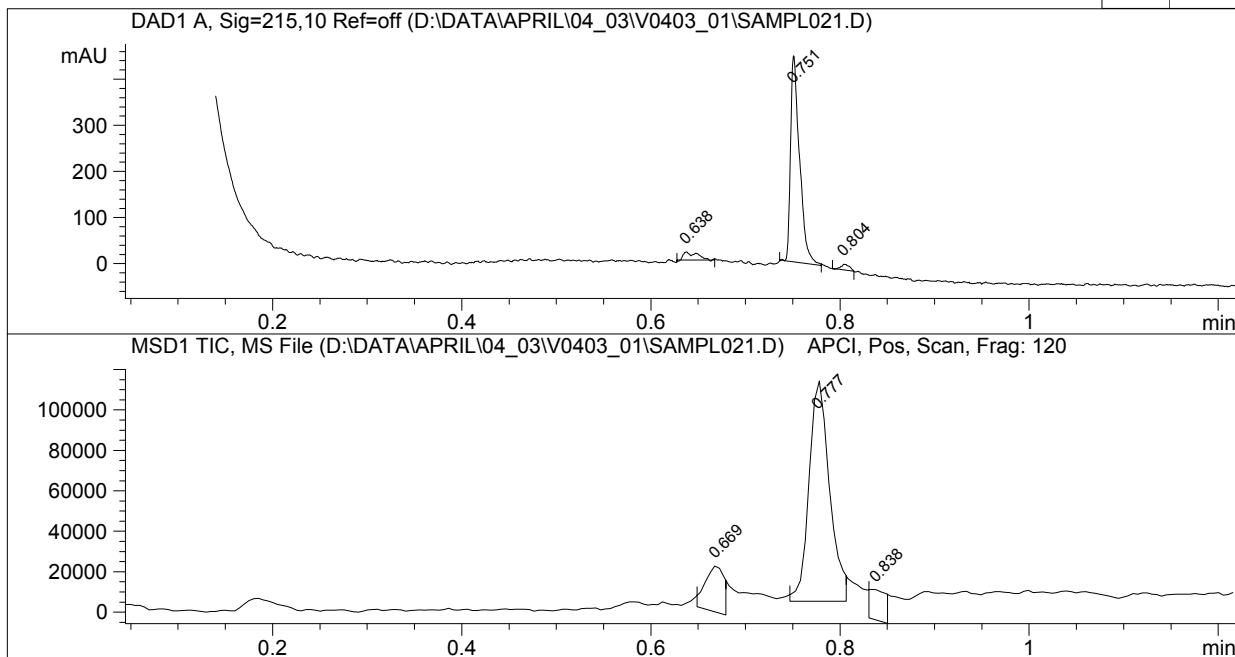

RT 0.669

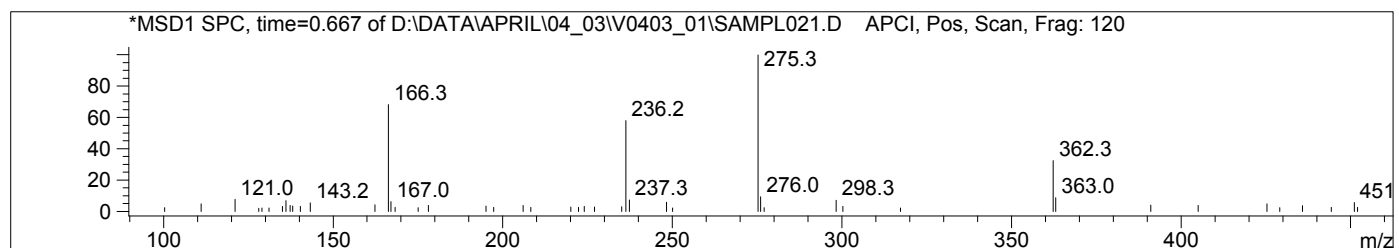

RT 0.777

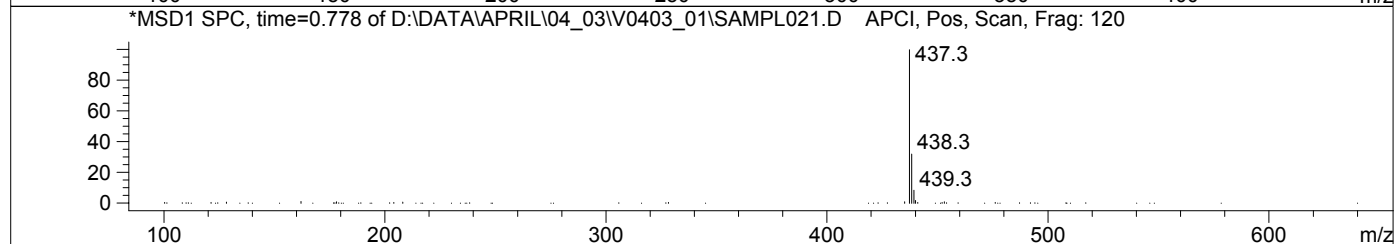

RT 0.838

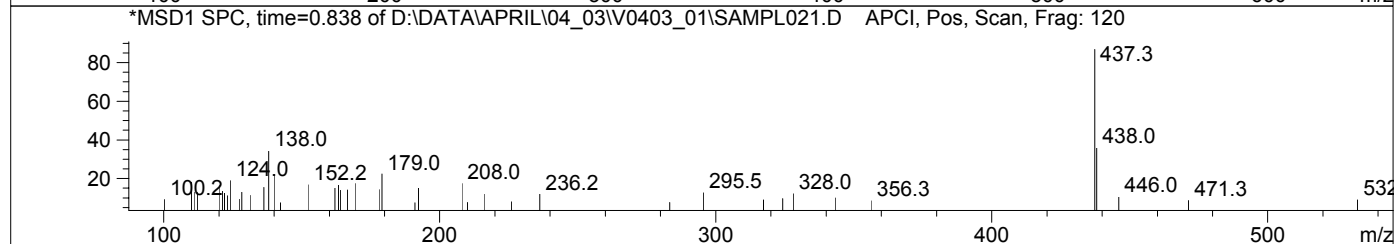

Supplement: data2 [file elife-70700-data2-v2.zip]
