# Supplementary material for: Selective androgen receptor degrader (SARD) to overcome antiandrogen resistance in castration-resistant prostate cancer
Source: eLife journal article supplement (doi:10.7554/elife.70700), 2023-01-19

Sample Name: 512197 OK  
DFN: D:\DATA\2005\NEW\MARCH\03\_15\03\_15\_06\  
SAMPL032.D

MaxPeak: 90.77% Ret\_Time: 0.710 min

The method for the Gradient Sample using  
short rapid resolution HT Cartridge ZORBAX  
SB-C18 4.6x15 mm (p/n 821975-932). For  
testing purity of synteZ.

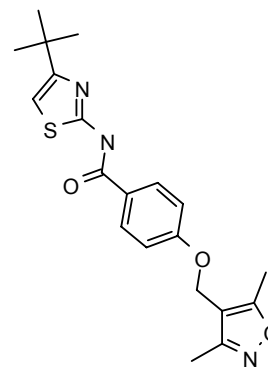

mw = 385,49

| # | Time  | Area% |
|---|-------|-------|
| 1 | 0.582 | 2.45  |
| 2 | 0.697 | 6.78  |
| 3 | 0.710 | 90.77 |

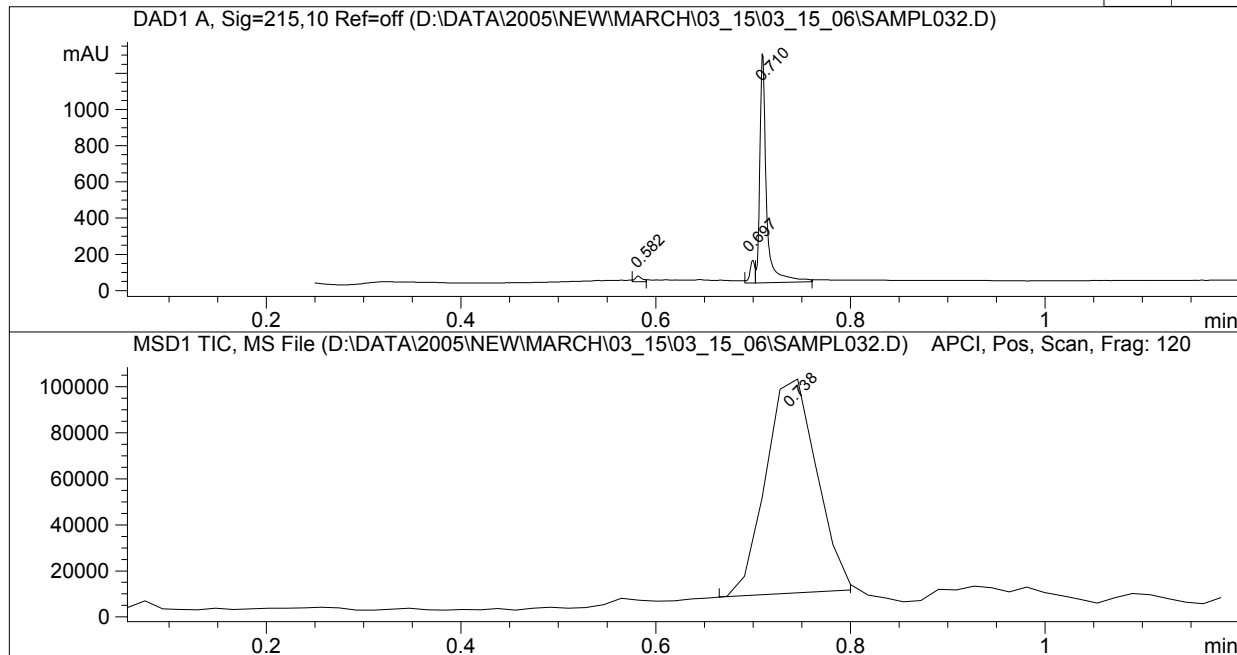

RT 0.738

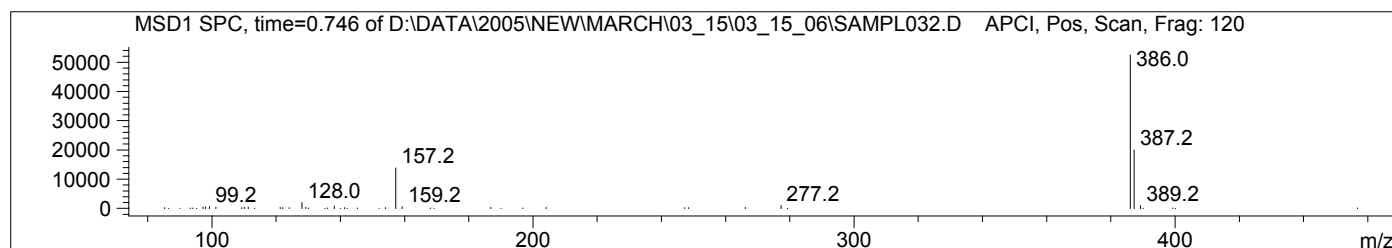

Supplement: data2 [file elife-70700-data2-v2.zip]
