# Supplementary material for: Selective androgen receptor degrader (SARD) to overcome antiandrogen resistance in castration-resistant prostate cancer
Source: eLife journal article supplement (doi:10.7554/elife.70700), 2023-01-19

MaxPeak: 99.39%  
Ret\_Time: 0.543 min

1347021

OK

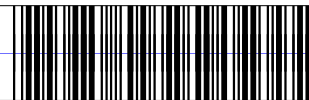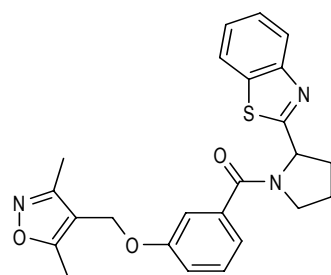

mw = 433.53

| # | Time  | Area% |
|---|-------|-------|
| 1 | 0.445 | 0.61  |
| 2 | 0.543 | 99.39 |

DAD1 A, Sig=215,10 Ref=off (D:\DATA\DECEMBER\12\_23\12\_22\_32\SAMPL004.D)

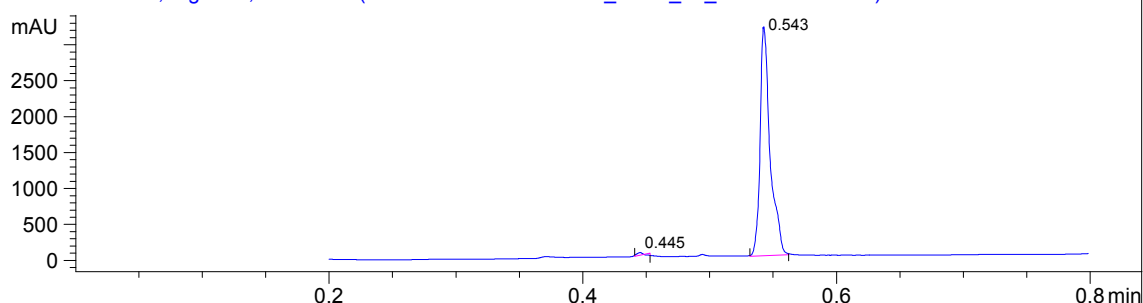

MSD1 TIC, MS File (D:\DATA\DECEMBER\12\_23\12\_22\_32\SAMPL004.D) ES-API, Scan, Frag: 120, "pos"

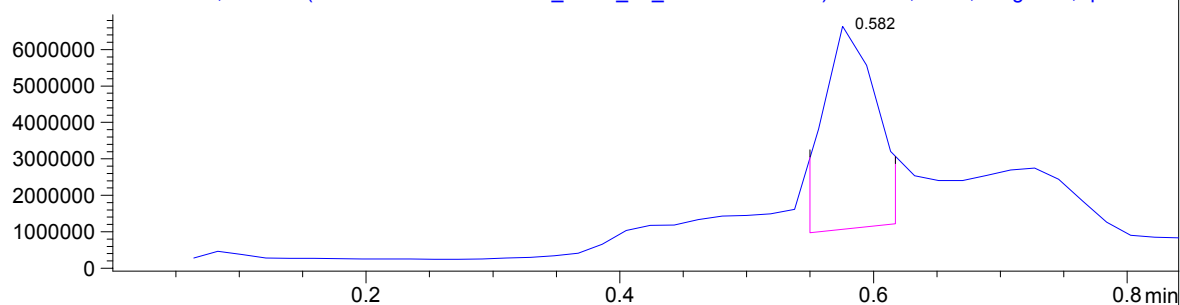

ADC1 A, ELSD (D:\DATA\DECEMBER\12\_23\12\_22\_32\SAMPL004.D)

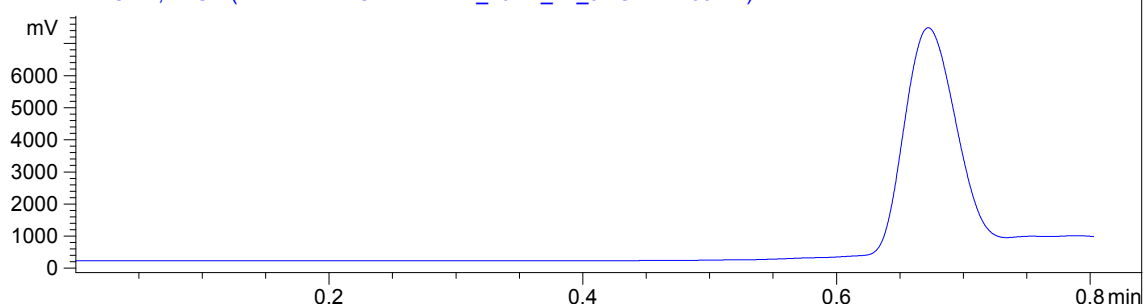

\*MSD1 SPC, time=0.576 of D:\DATA\DECEMBER\12\_23\12\_22\_32\SAMPL004.D ES-API, Scan, Frag: 120, "pos"

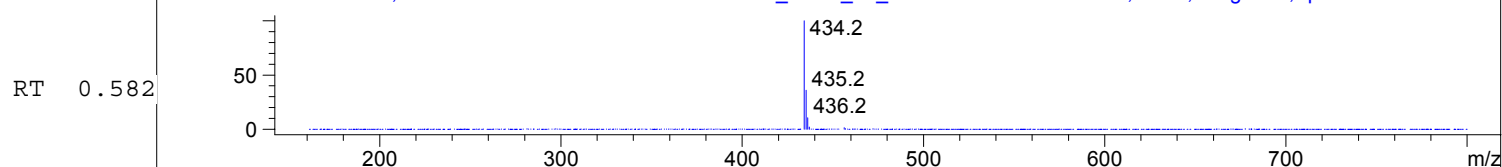

Supplement: data2 [file elife-70700-data2-v2.zip]
