# Supplementary material for: Selective androgen receptor degrader (SARD) to overcome antiandrogen resistance in castration-resistant prostate cancer
Source: eLife journal article supplement (doi:10.7554/elife.70700), 2023-01-19

Sample Name: 1231624

DFN: D:\DATA\MAY\05\_15\V0515\_02\SAMPL044.D

MaxPeak: 100.00% Ret\_Time: 0.700 min

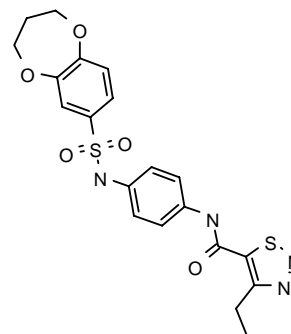

mw = 460,53

The method for the Gradient Sample using short rapid resolution HT Cartridge ZORBAX SB-C18 4.6x15 mm (p/n 821975-932). For testing purity of synte.

| # | Time  | Area%  |
|---|-------|--------|
| 1 | 0.700 | 100.00 |

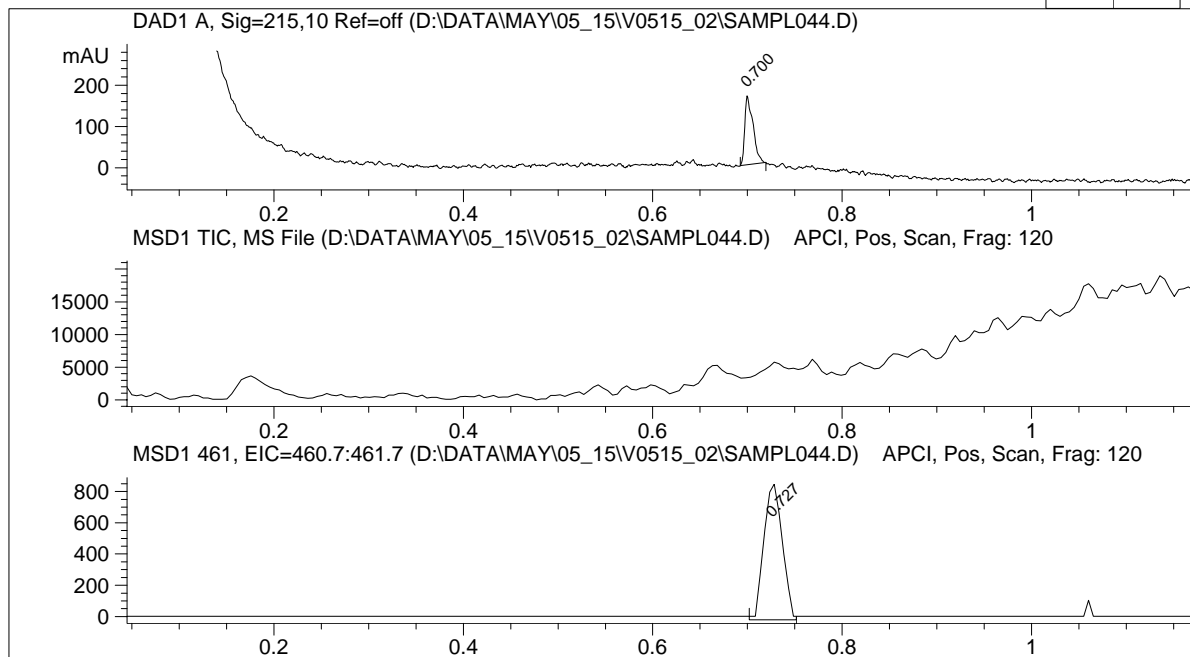

RT 0.727

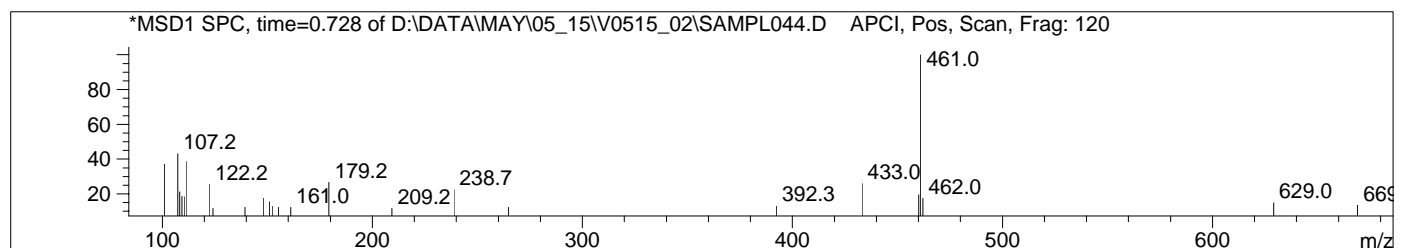

Supplement: data2 [file elife-70700-data2-v2.zip]
