# Supplementary material for: Selective androgen receptor degrader (SARD) to overcome antiandrogen resistance in castration-resistant prostate cancer
Source: eLife journal article supplement (doi:10.7554/elife.70700), 2023-01-19

Sample: 191  
File: 5850\_91  
Vial: C/12

Date: 09-Jan-2003  
Time: 12:30:59  
Description: 695442

Page 1.  
AMRI code: ALB-H01862192  
Vial label: M1822242AMS0001

## DAD: 254

max. intensity: 2.9E6

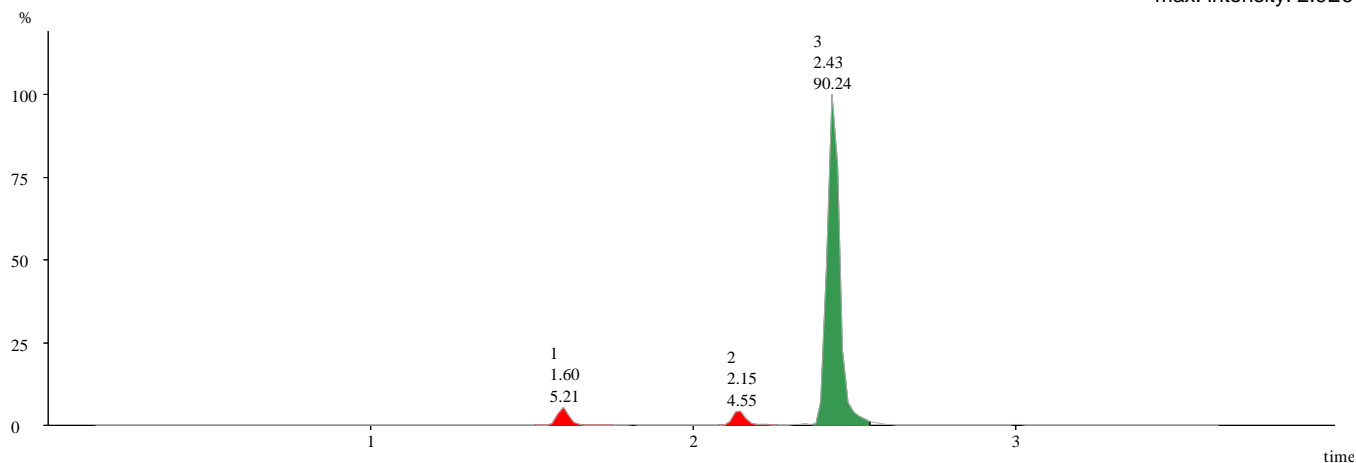

| Peak_ID | Peak      | Area | Area% | Height | Time | Mass Found |
|---------|-----------|------|-------|--------|------|------------|
| 1       | 1.51 1.75 | 7.E3 | 5.21  | 2.E5   | 1.60 |            |
| 2       | 2.08 2.26 | 6.E3 | 4.55  | 1.E5   | 2.15 |            |
| 3       | 2.37 2.55 | 1.E5 | 90.24 | 3.E6   | 2.43 | 496.21     |

## MS ES+ :497.21

max. intensity: 2.5E4

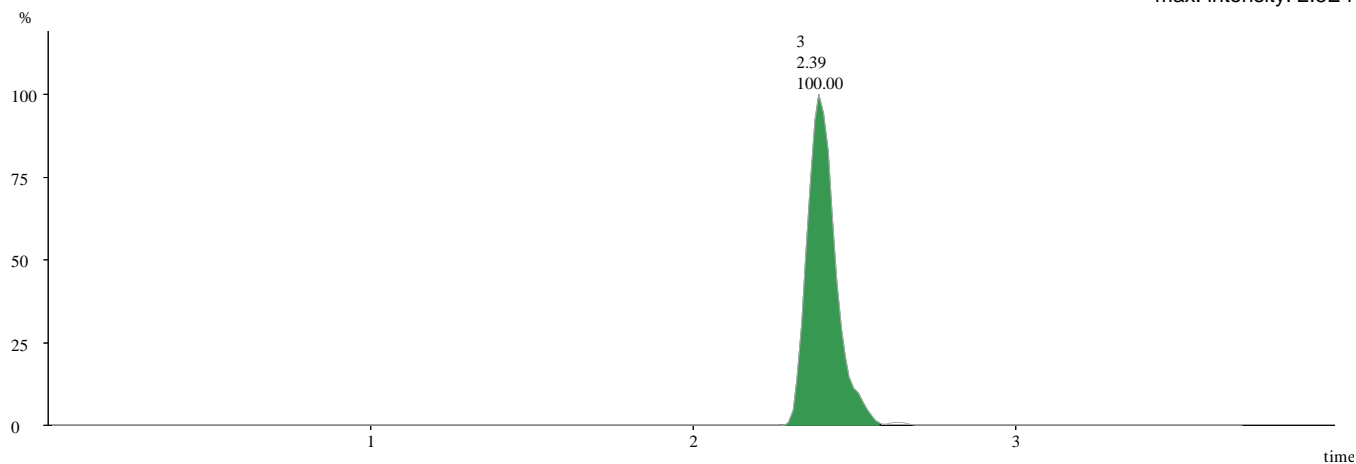

| Peak_ID | Peak      | Area | Area% | Height | Time | Mass Found |
|---------|-----------|------|-------|--------|------|------------|
| 3       | 2.27 2.58 | 3.E3 | 100   | 2.E4   | 2.39 | 496.21     |

Sample: 191  
File: 5850\_91  
Vial: C/12

Date: 09-Jan-2003  
Time: 12:30:59  
Description: 695442

Page 2.  
AMRI code: ALB-H01862192  
Vial label: M1822242AMS0001

## MS ES+ :TIC

max. intensity: 3E4

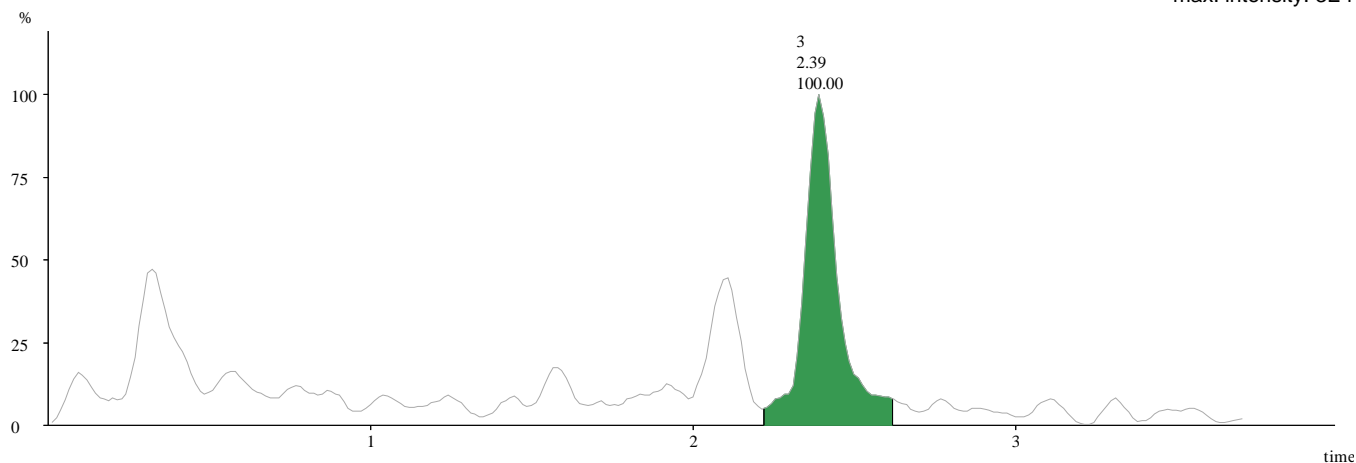

| Peak_ID | Peak      | Area | Area% | Height | Time | Mass Found |
|---------|-----------|------|-------|--------|------|------------|
| 3       | 2.22 2.62 | 3.E3 | 100   | 3.E4   | 2.39 | 496.21     |

## MS: ES+

Combine (117:119-(107:109+132:135))

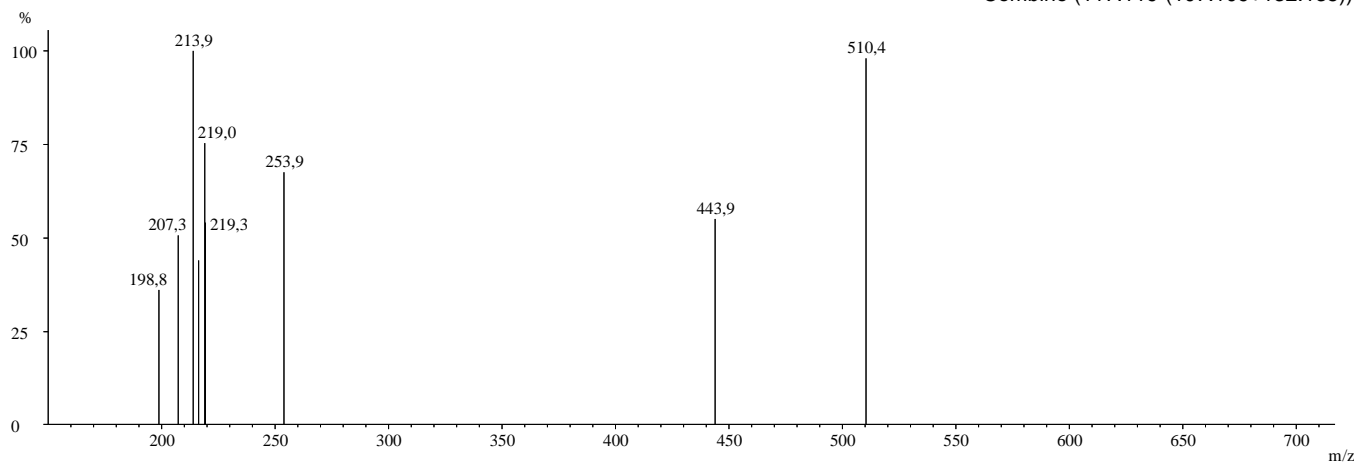

| Peak_ID | Compound | Time | Mass found |
|---------|----------|------|------------|
| 1       |          | 1.60 |            |

Sample: 191  
File: 5850\_91  
Vial: C/12

Date: 09-Jan-2003  
Time: 12:30:59  
Description: 695442

Page 3.  
AMRI code: ALB-H01862192  
Vial label: M1822242AMS0001

## MS: ES+

Combine (158:160-(149:151+171:173))

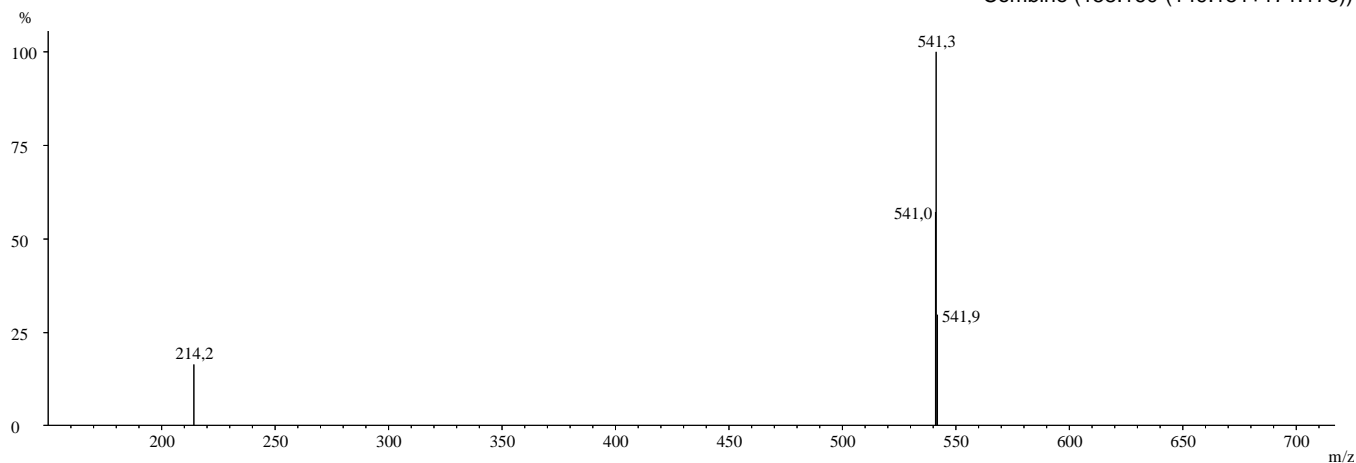

## MS: ES+

Combine (176:178-(159:161+197:199))

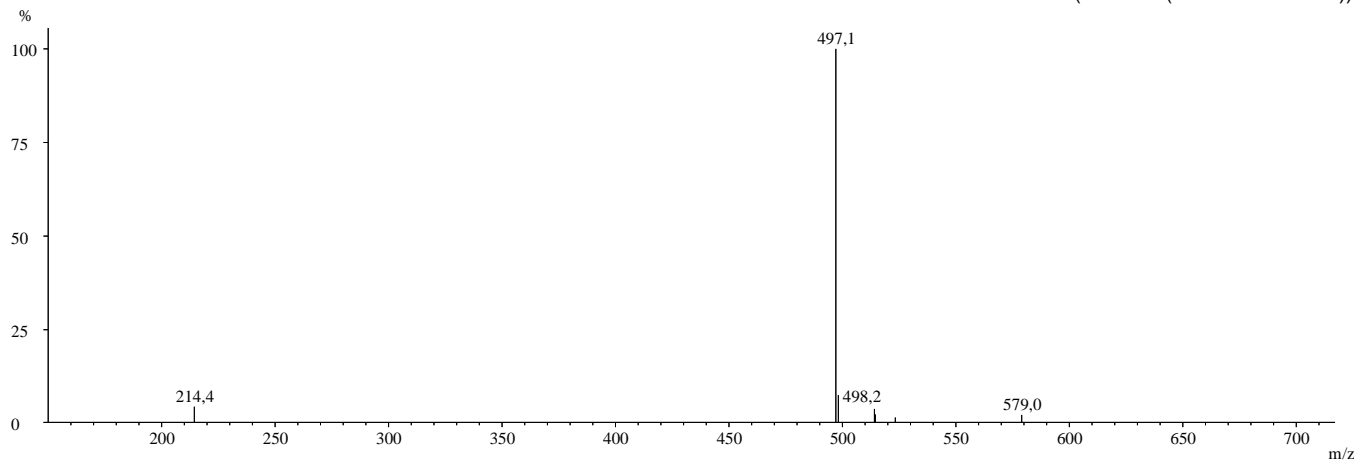

Supplement: data2 [file elife-70700-data2-v2.zip]
