# Supplementary material for: Selective androgen receptor degrader (SARD) to overcome antiandrogen resistance in castration-resistant prostate cancer
Source: eLife journal article supplement (doi:10.7554/elife.70700), 2023-01-19
Supplement: data2 [file elife-70700-data2-v2.zip]

## -.o.-Syntez Purity Report -.o.-

Agilent 1100 LC/MSD SL  
Diodearray G1315B (DAD1A-215nm; DAD1B-254nm)  
Mass Quad G1956B (MSD1-Pos, MSD2-Neg)  
ELSD Altech 3300 (ADC1 A, ELSD)

Mobile Phase:A-H<sub>2</sub>O+0.1%HCOOH;B-MeCN+0.1HCOOH  
Separation column:  
Rapid Resolutionn HT Cartige 4.6x30mm,  
1.8-Micron, Zorbx SB-C18

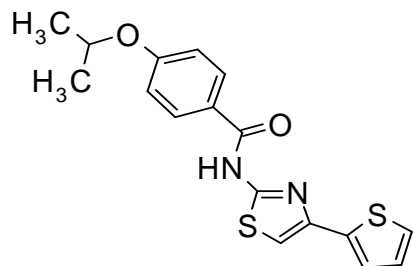

Mol.Weight: 344.46

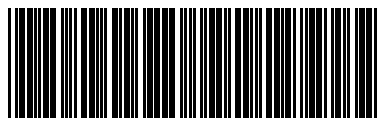

F0473-0018

M11768

-&gt;

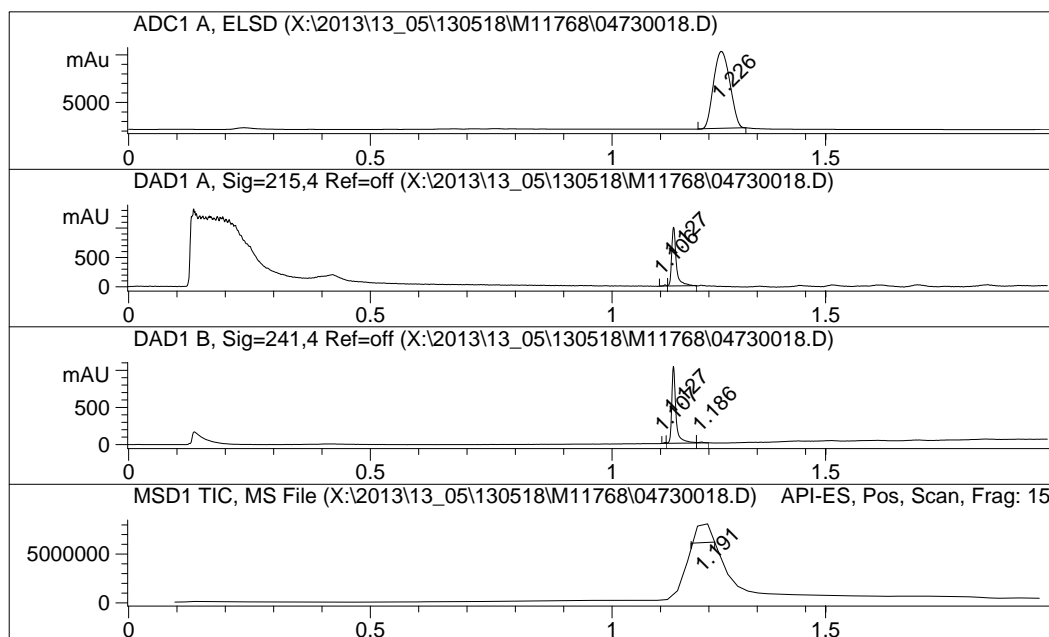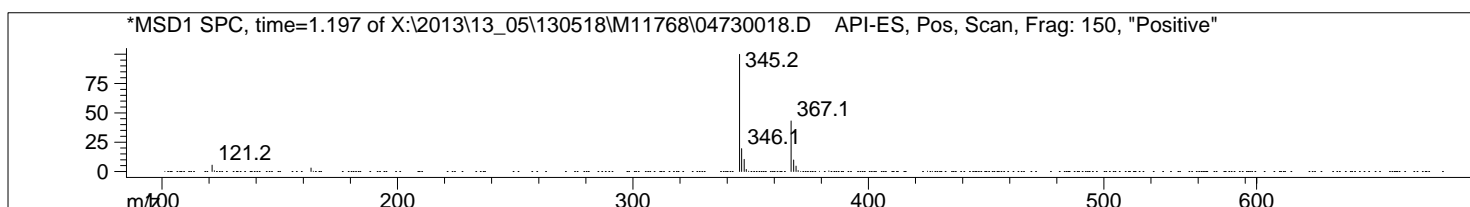

| # | Signal       | R.Time | Area %  |
|---|--------------|--------|---------|
| 1 | ADC1 A, ELSD | 1.226  | 100.000 |

  

| # | Signal                    | R.Time | Area % |
|---|---------------------------|--------|--------|
| 1 | DAD1 A, Sig=215,4 Ref=off | 1.106  | 1.095  |
| 2 |                           | 1.127  | 98.905 |

  

| # | Signal                    | R.Time | Area % |
|---|---------------------------|--------|--------|
| 1 | DAD1 B, Sig=241,4 Ref=off | 1.107  | 0.697  |
| 2 |                           | 1.127  | 97.841 |
| 3 |                           | 1.186  | 1.462  |

  

| # | Signal            | R.Time | Area %  |
|---|-------------------|--------|---------|
| 1 | MSD1 TIC, MS File | 1.191  | 100.000 |
