# Supplementary material for: Selective androgen receptor degrader (SARD) to overcome antiandrogen resistance in castration-resistant prostate cancer
Source: eLife journal article supplement (doi:10.7554/elife.70700), 2023-01-19
Supplement: data2 [file elife-70700-data2-v2.zip]

Sample: 157  
File: Ar23321\_57  
Vial: A/8

Date: 10-Apr-2008  
Time: 22:11:45  
Description: 793942

Page 1.  
AMRI code: ALB-H00824478  
Vial label: 300000451785

## DAD: 220

max. intensity: 1.1E6

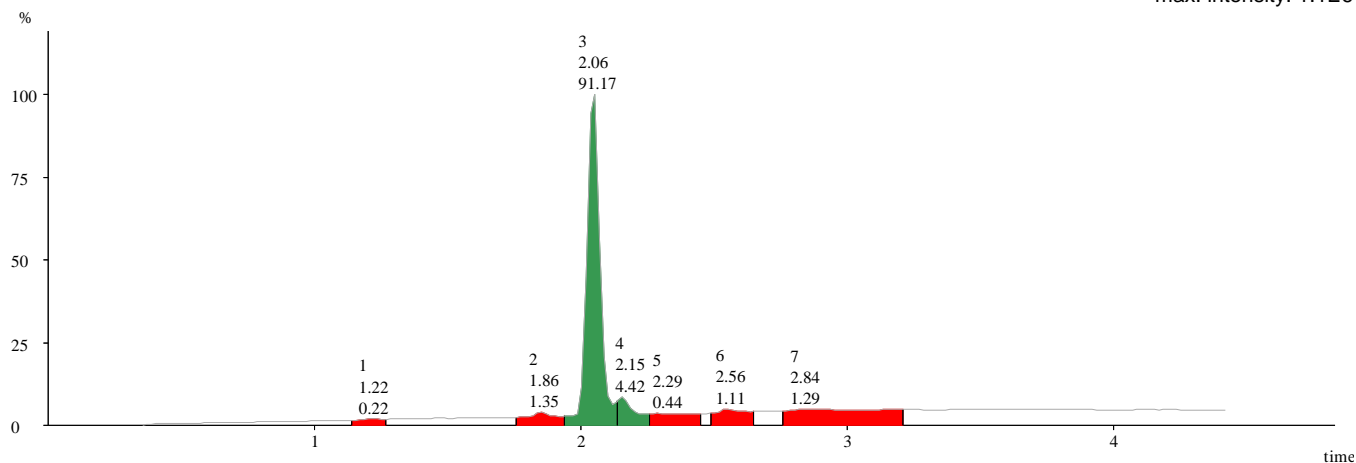

| Peak_ID | Peak      | Area | Area% | Height | Time | Mass Found |
|---------|-----------|------|-------|--------|------|------------|
| 1       | 1.14 1.27 | 1.E2 | 0.22  | 2.E3   | 1.22 |            |
| 2       | 1.76 1.94 | 9.E2 | 1.35  | 2.E4   | 1.86 |            |
| 3       | 1.94 2.14 | 6.E4 | 91.17 | 1.E6   | 2.06 | 539.21     |
| 4       | 2.14 2.26 | 3.E3 | 4.42  | 6.E4   | 2.15 | 539.21     |
| 5       | 2.26 2.45 | 3.E2 | 0.44  | 4.E3   | 2.29 |            |
| 6       | 2.49 2.65 | 7.E2 | 1.11  | 1.E4   | 2.56 |            |
| 7       | 2.76 3.21 | 8.E2 | 1.29  | 5.E3   | 2.84 |            |

## MS ES+ :542.21+557.21+1079.42+540.21

max. intensity: 1.6E4

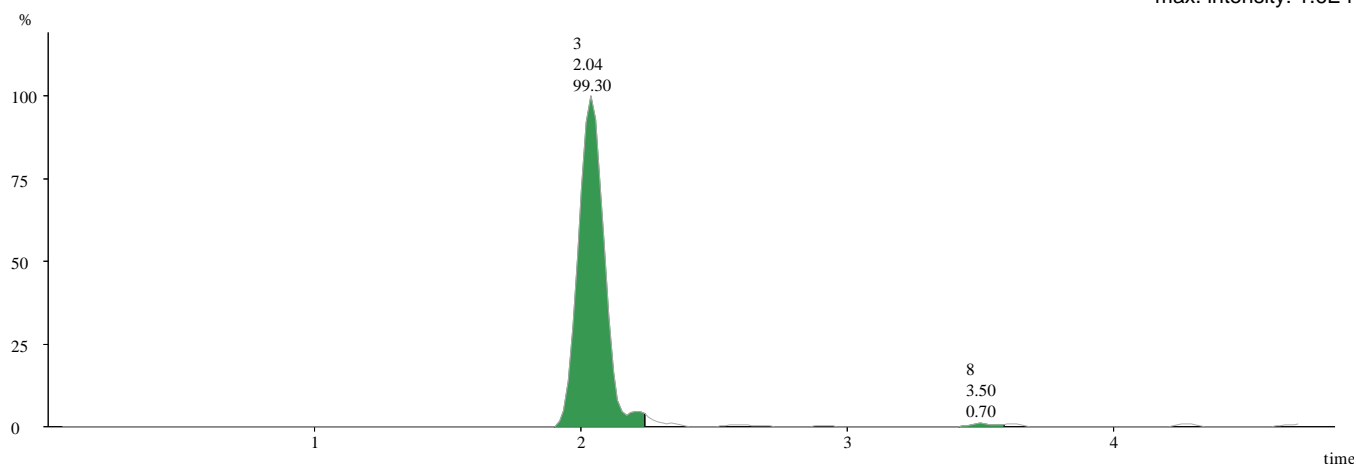

| Peak_ID | Peak      | Area | Area% | Height | Time | Mass Found |
|---------|-----------|------|-------|--------|------|------------|
| 3       | 1.90 2.24 | 2.E3 | 99.3  | 2.E4   | 2.04 | 539.21     |
| 8       | 3.42 3.59 | 1.E1 | 0.7   | 2.E2   | 3.50 | 539.21     |

Sample: 157  
File: Ar23321\_57  
Vial: A/8

Date: 10-Apr-2008  
Time: 22:11:45  
Description: 793942

Page 2.  
AMRI code: ALB-H00824478  
Vial label: 300000451785

## MS ES+ :TIC

max. intensity: 2.1E4

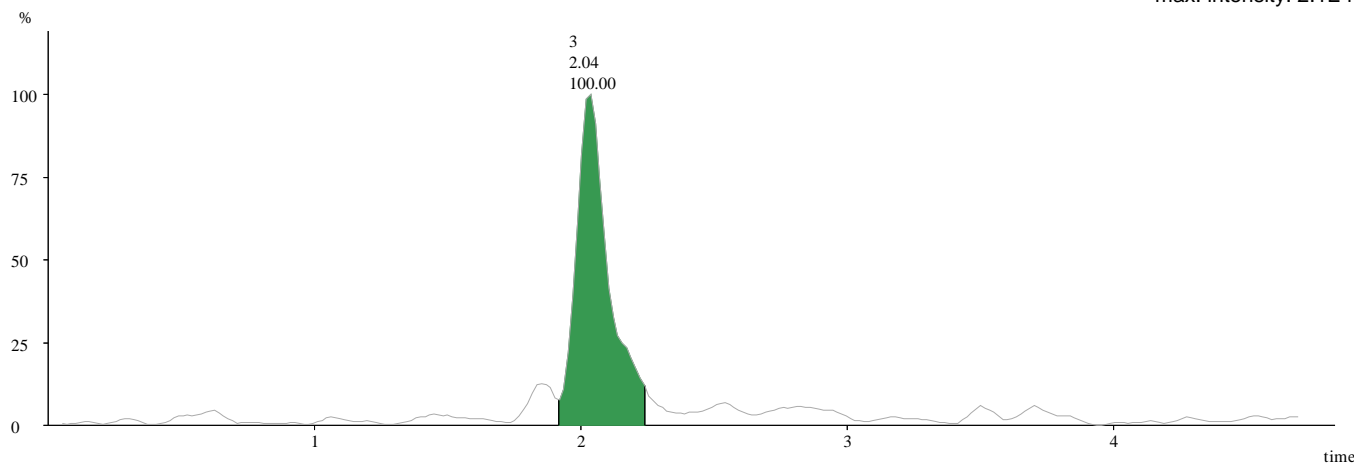

| Peak_ID | Peak      | Area | Area% | Height | Time | Mass Found |
|---------|-----------|------|-------|--------|------|------------|
| 3       | 1.92 2.24 | 2.E3 | 100   | 2.E4   | 2.04 | 539.21     |

## MS: ES+

Combine (110:112-(101:103+118:120))

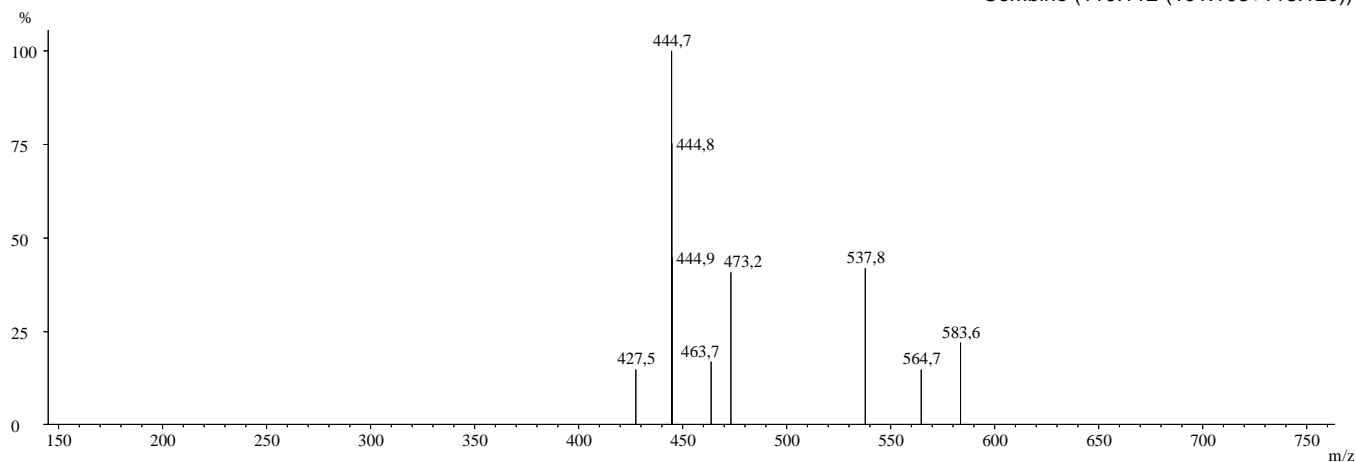

| Peak_ID | Compound | Time | Mass found |
|---------|----------|------|------------|
| 2       |          | 1.86 |            |

Sample: 157  
File: Ar23321\_57  
Vial: A/8

Date: 10-Apr-2008  
Time: 22:11:45  
Description: 793942

Page 3.  
AMRI code: ALB-H00824478  
Vial label: 300000451785

## MS: ES+

Combine (121:123-(111:113+136:138))

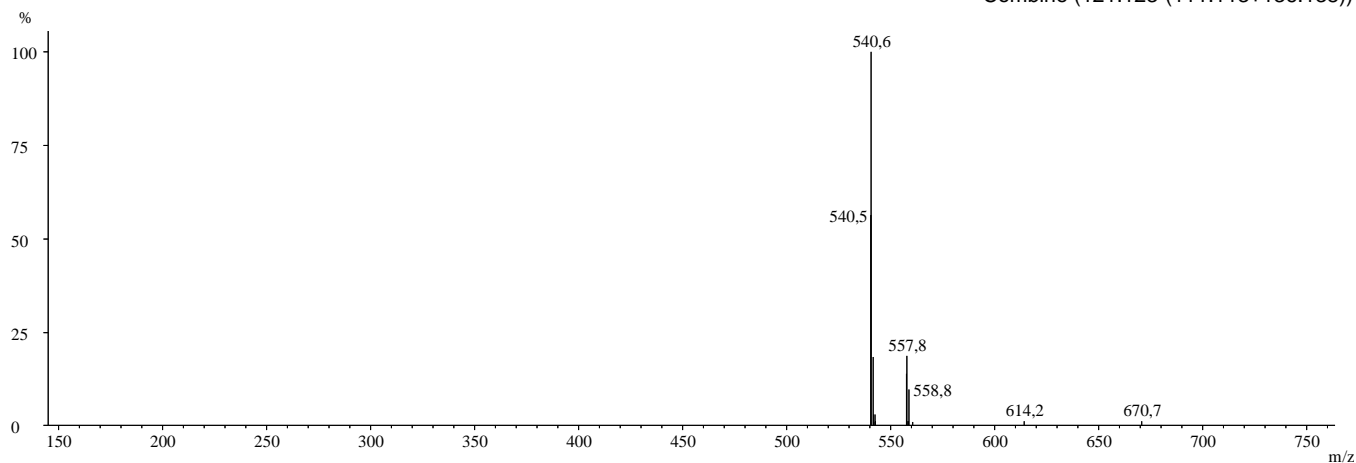

| Peak_ID | Compound | Time | Mass found |
|---------|----------|------|------------|
| 3       | Found    | 2.04 | 539.2100   |

## MS: ES+

Combine (128:130-(124:126+137:139))

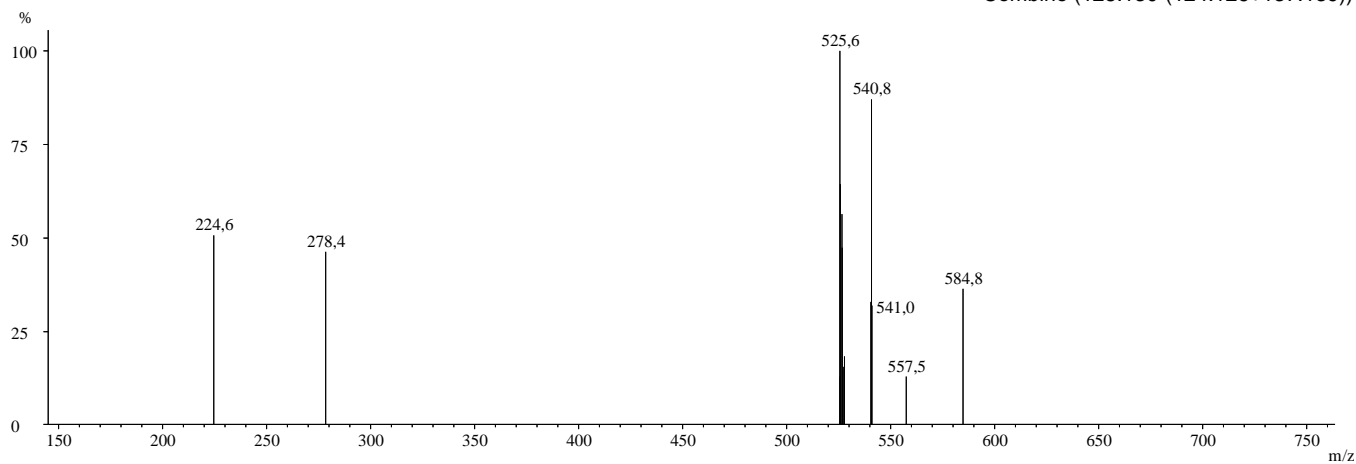

| Peak_ID | Compound | Time | Mass found |
|---------|----------|------|------------|
| 4       | Found    | 2.15 | 539.2100   |

Sample: 157  
File: Ar23321\_57  
Vial: A/8

Date: 10-Apr-2008  
Time: 22:11:45  
Description: 793942

Page 4.  
AMRI code: ALB-H00824478  
Vial label: 300000451785

## MS: ES+

Combine (152:154-(145:146+161:163))

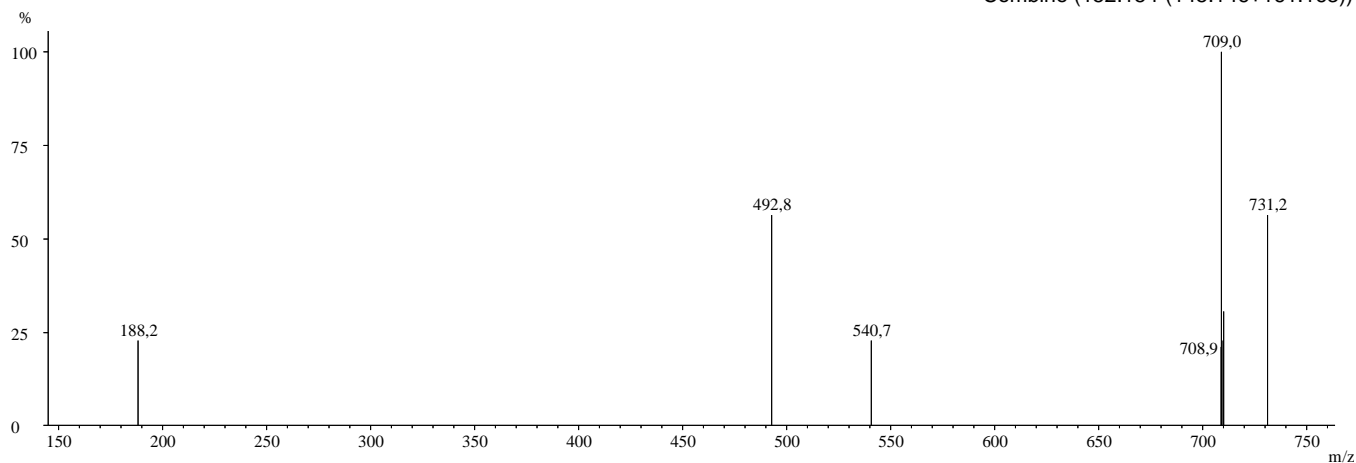

| Peak_ID | Compound | Time | Mass found |
|---------|----------|------|------------|
| 6       |          | 2.56 |            |

## MS: ES+

Combine (169:170-(160:162+194:196))

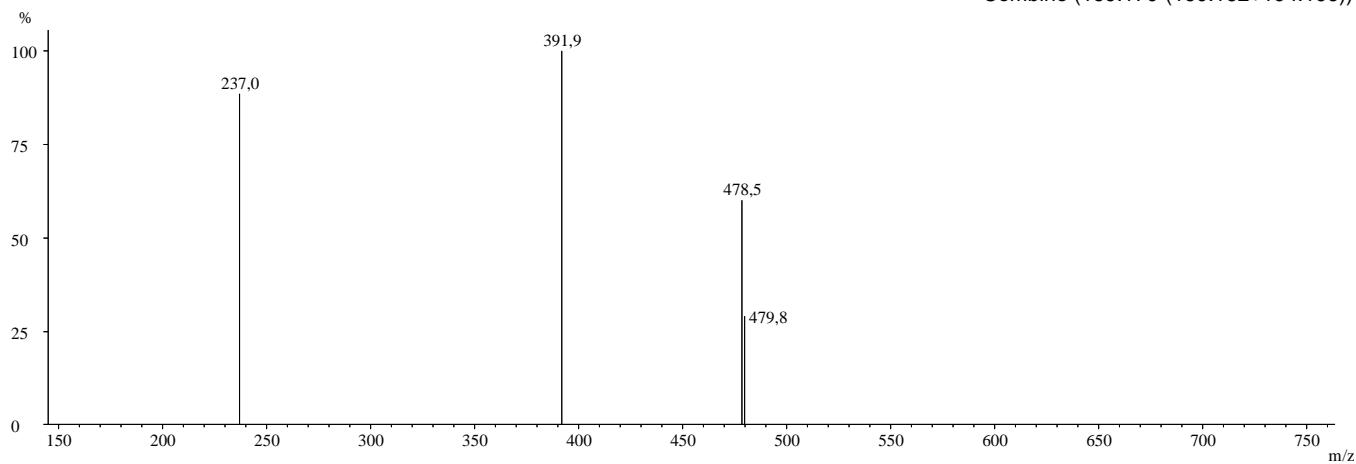

| Peak_ID | Compound | Time | Mass found |
|---------|----------|------|------------|
| 7       |          | 2.84 |            |
