# Supplementary material for: Selective androgen receptor degrader (SARD) to overcome antiandrogen resistance in castration-resistant prostate cancer
Source: eLife journal article supplement (doi:10.7554/elife.70700), 2023-01-19

MaxPeak: 95.15%  
Ret\_Time: 0.960 min

3612172

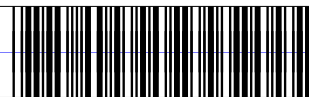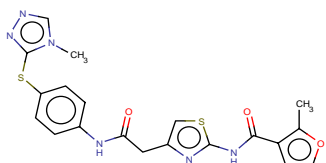

Mol Wt 454.525  
Exact Mass 454.09

| # | Time  | Area% |
|---|-------|-------|
| 1 | 0.825 | 3.13  |
| 2 | 0.960 | 95.15 |
| 3 | 1.023 | 1.73  |

DAD1 A, Sig=215,16 Ref=off (05\_21\05\_19\_40\SAMPL053.D)

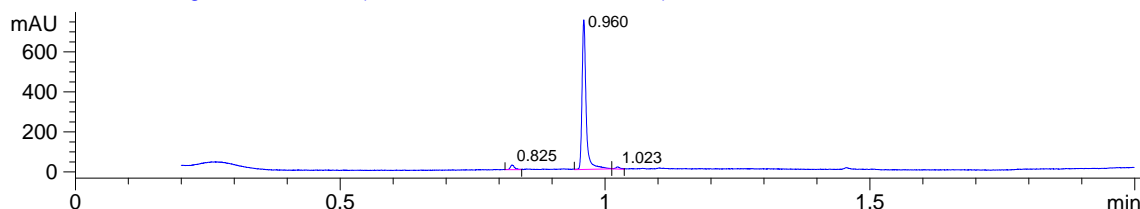

DAD1 B, Sig=254,16 Ref=off (05\_21\05\_19\_40\SAMPL053.D)

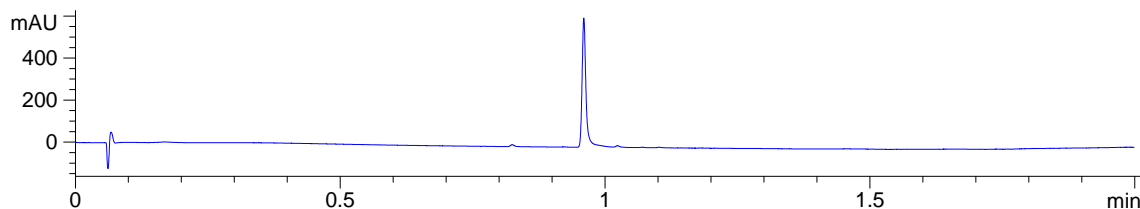

MSD1 TIC, MS File (C:\CHEM32\1\DATA\05\_21\05\_19\_40\SAMPL053.D) ES-API, Scan, Frag: 100, "POS"

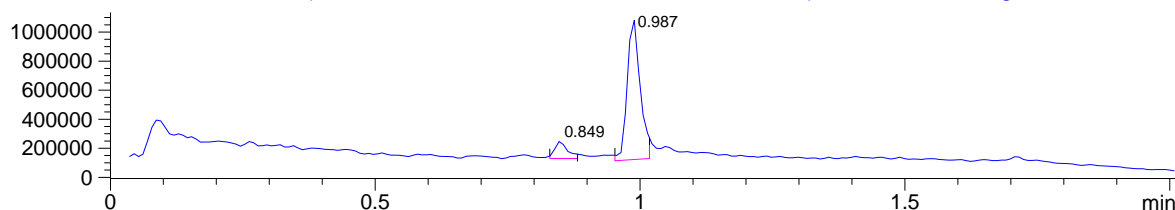

MSD2 TIC, MS File (C:\CHEM32\1\DATA\05\_21\05\_19\_40\SAMPL053.D) ES-API, Scan, Frag: 100, "NEG"

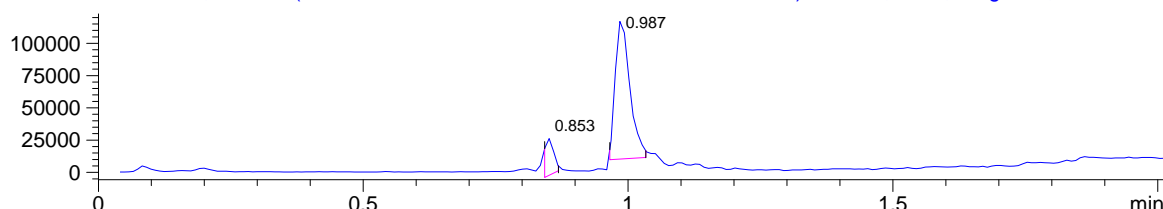

ADC1 A, ELSD (05\_21\05\_19\_40\SAMPL053.D)

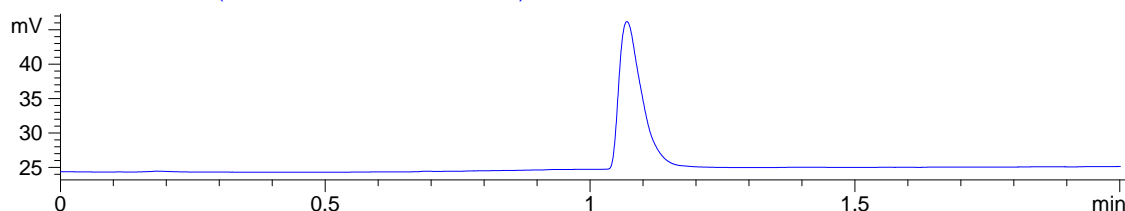

RT 0.849

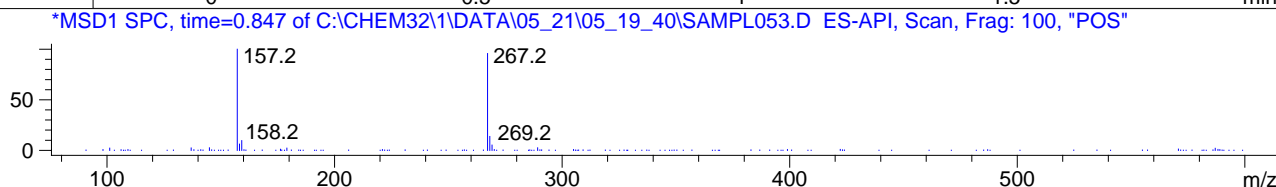

RT 0.987

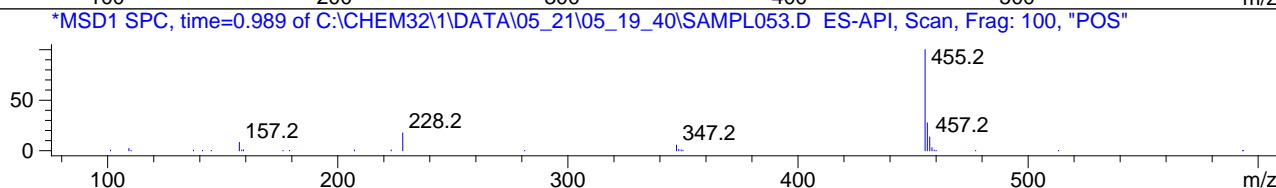

RT 0.853

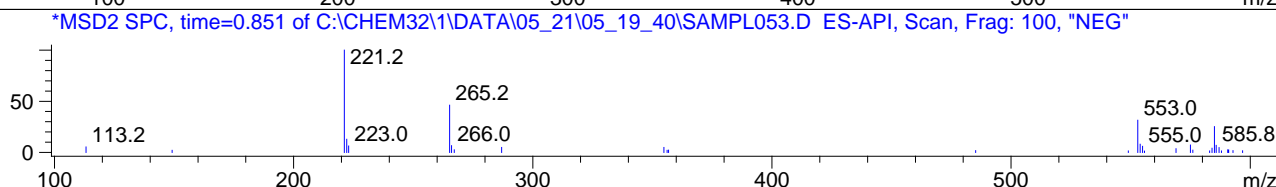

RT 0.987

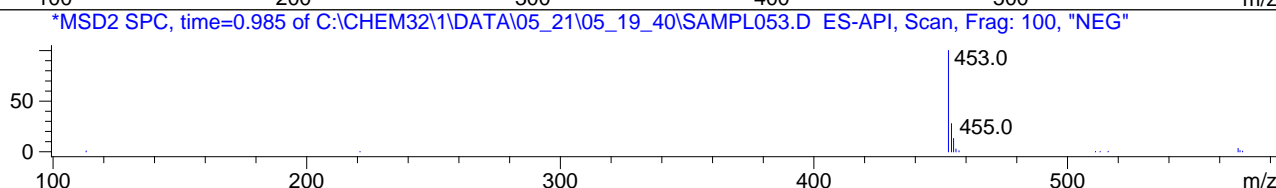

Supplement: data2 [file elife-70700-data2-v2.zip]
