# Supplementary material for: Selective androgen receptor degrader (SARD) to overcome antiandrogen resistance in castration-resistant prostate cancer
Source: eLife journal article supplement (doi:10.7554/elife.70700), 2023-01-19

Sample Name: 1229024

OK

DFN: D:\DATA\MARCH\03\_27\03\_24\_10\SAMPL014.D

-----  
MaxPeak: 97.55% Ret\_Time: 0.705 min  
-----

The method for the Gradient Sample using  
short rapid resolution HT Cartridge ZORBAX  
SB-C18 4.6x15 mm (p/n 821975-932). For  
testing purity of synteZ.

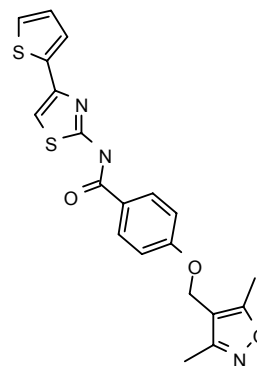

mw = 411,5

| # | Time  | Area% |
|---|-------|-------|
| 1 | 0.522 | 2.45  |
| 2 | 0.705 | 97.55 |

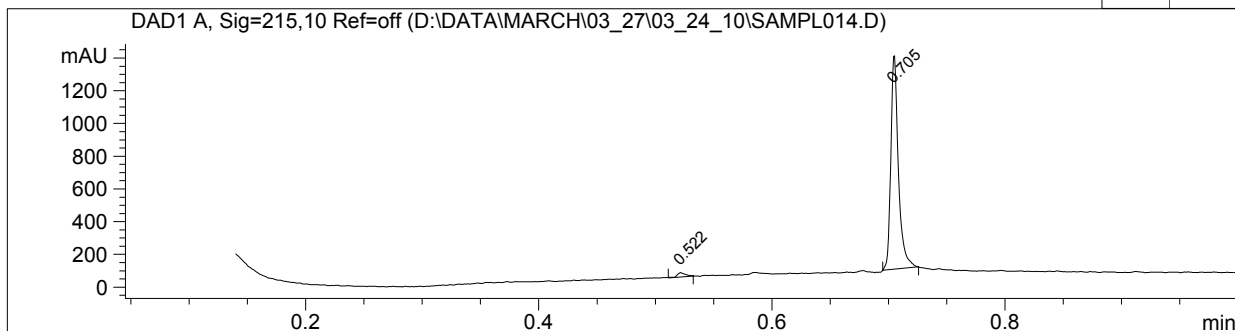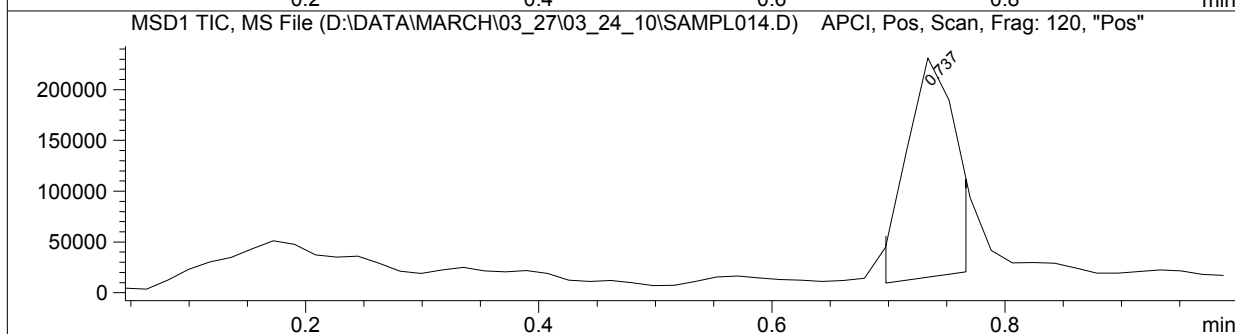

RT 0.737

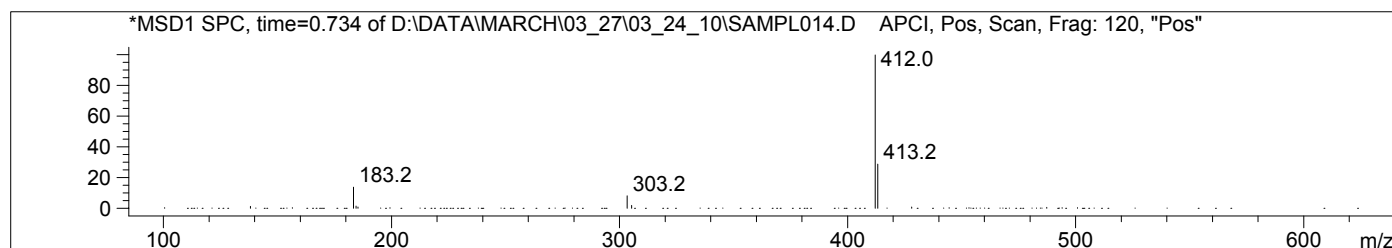

Supplement: data2 [file elife-70700-data2-v2.zip]
