# Supplementary material for: Selective androgen receptor degrader (SARD) to overcome antiandrogen resistance in castration-resistant prostate cancer
Source: eLife journal article supplement (doi:10.7554/elife.70700), 2023-01-19

Sample Name: 1188094 OK

DFN: C:\HPCHEM\1\DATA\02\_28\02\_27\_05\  
SAMPL000.D

MaxPeak: 98.44% Ret\_Time: 0.690 min

The method for the Gradient Sample using  
short rapid resolution HT Cartridge ZORBAX  
SB-C18 4.6x15 mm (p/n 821975-932). For  
testing purity of synteZ.

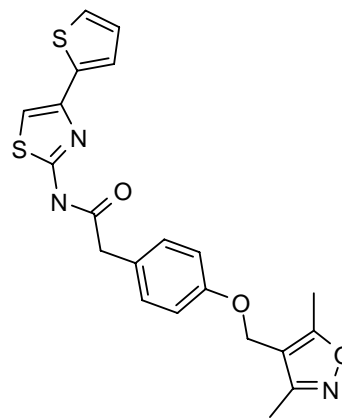

mw = 425,53

| # | Time  | Area% |
|---|-------|-------|
| 1 | 0.521 | 1.56  |
| 2 | 0.690 | 98.44 |

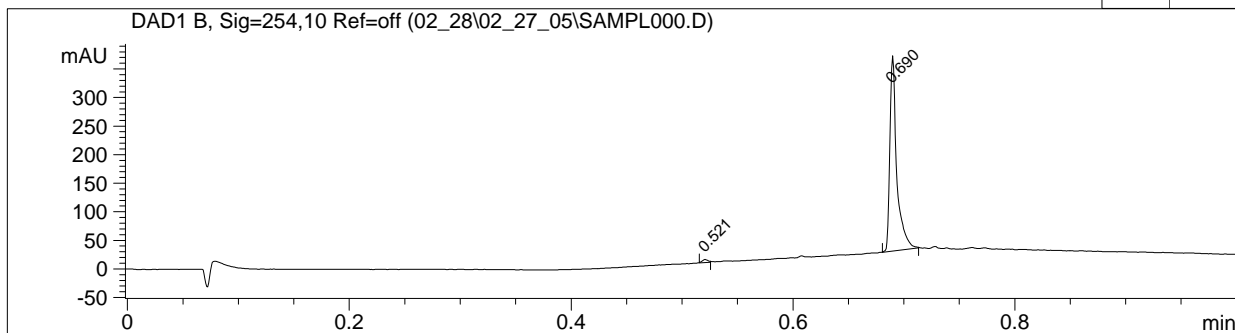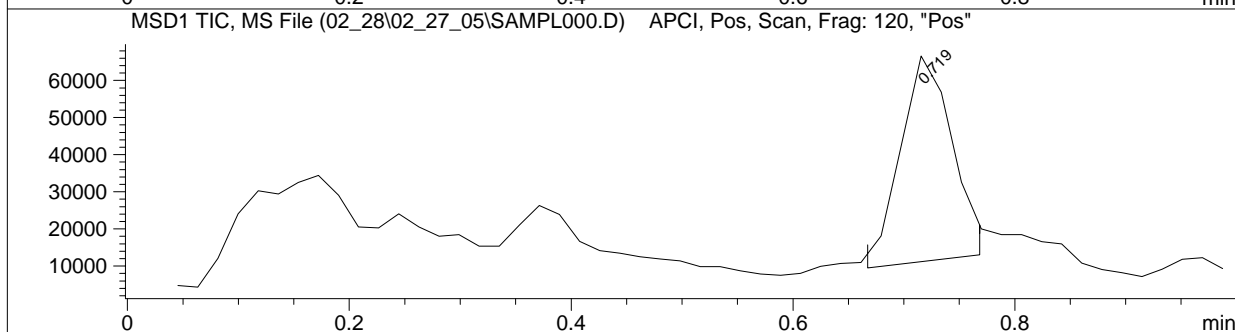

RT 0.719

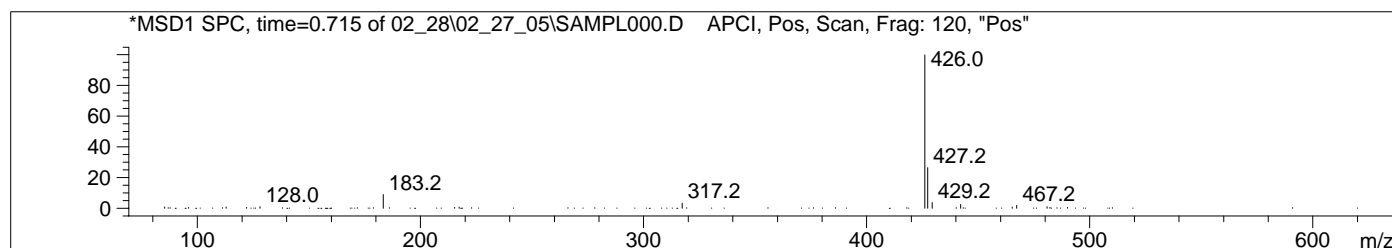

Supplement: data2 [file elife-70700-data2-v2.zip]
