# Supplementary material for: Selective androgen receptor degrader (SARD) to overcome antiandrogen resistance in castration-resistant prostate cancer
Source: eLife journal article supplement (doi:10.7554/elife.70700), 2023-01-19

DFN: D:\DATATY~1\OLD\04\V04\_04\V0404\_04\  
SAMPL026.D

MaxPeak: 97.13% Ret\_Time: 0.645 min

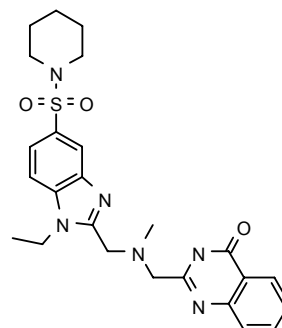

mw = 494,62

The method for the Gradient Sample using  
short rapid resolution HT Cartridge ZORBAX  
SB-C18 4.6x15 mm (p/n 821975-932). For  
testing purity of synteZ.

| # | Time  | Area% |
|---|-------|-------|
| 1 | 0.600 | 0.80  |
| 2 | 0.645 | 97.13 |
| 3 | 0.707 | 2.07  |

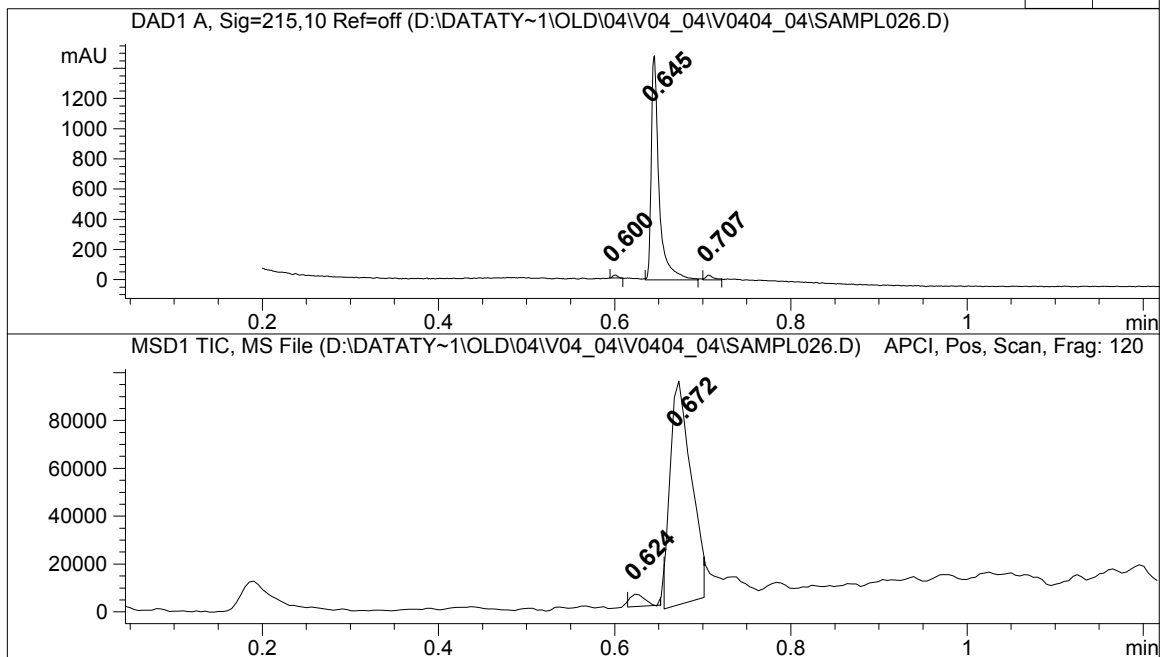

RT 0.624

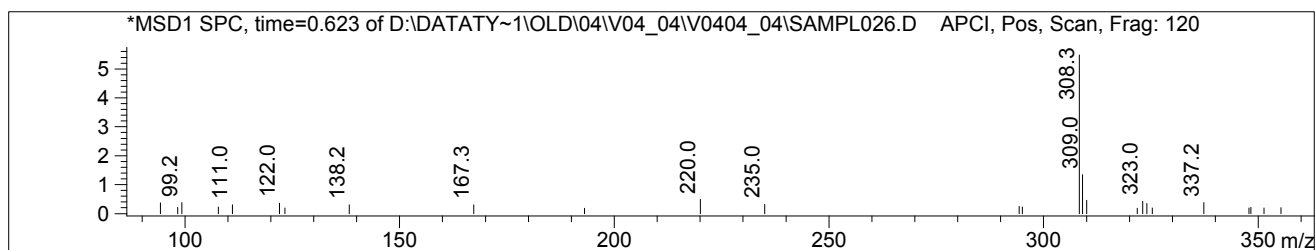

RT 0.672

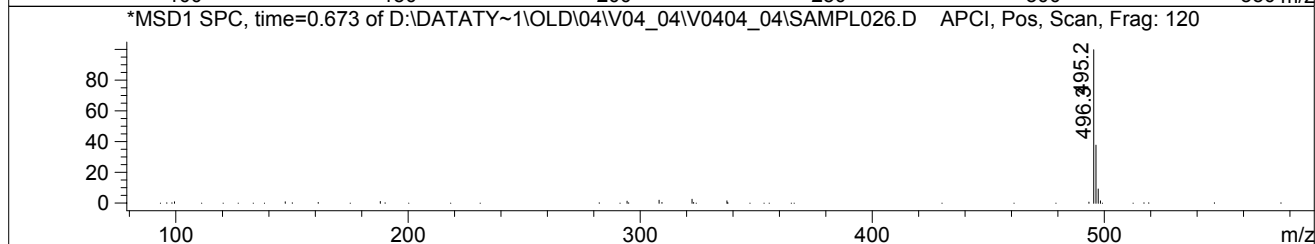

Supplement: data2 [file elife-70700-data2-v2.zip]
