# Supplementary material for: Selective androgen receptor degrader (SARD) to overcome antiandrogen resistance in castration-resistant prostate cancer
Source: eLife journal article supplement (doi:10.7554/elife.70700), 2023-01-19

MaxPeak: 100.00%  
Ret\_Time: 0.711 min

1968818

OK

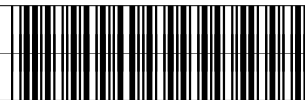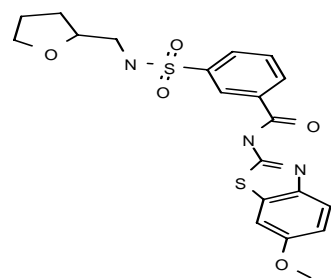

mw = 447.54

| # | Time  | Area%  |
|---|-------|--------|
| 1 | 0.711 | 100.00 |

DAD1 A, Sig=215,10 Ref=off (D:\DATE\11\_14\11\_13\_07\SAMPL050.D)

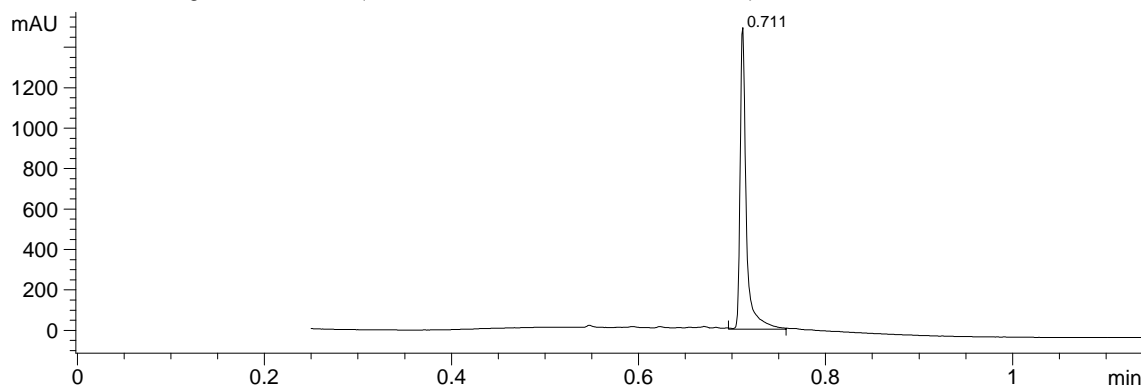

DAD1 B, Sig=254,10 Ref=off (D:\DATE\11\_14\11\_13\_07\SAMPL050.D)

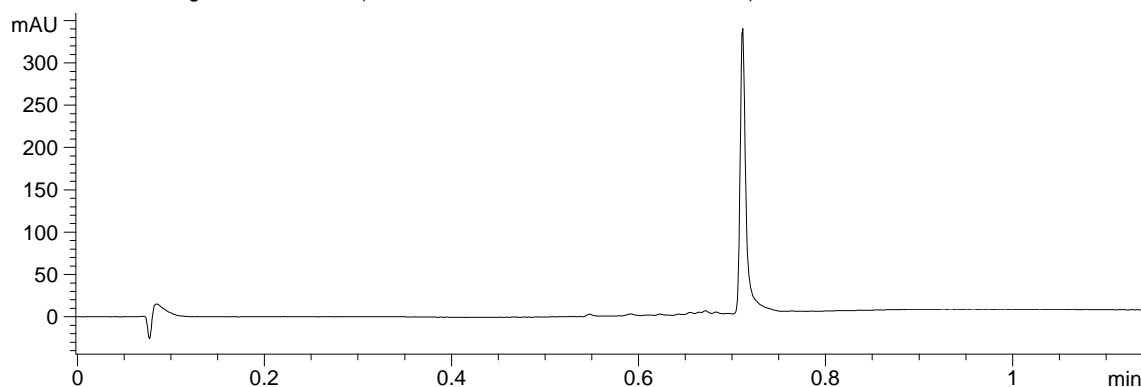

MSD1 TIC, MS File (D:\DATE\11\_14\11\_13\_07\SAMPL050.D) APCI, Scan, Frag: 120

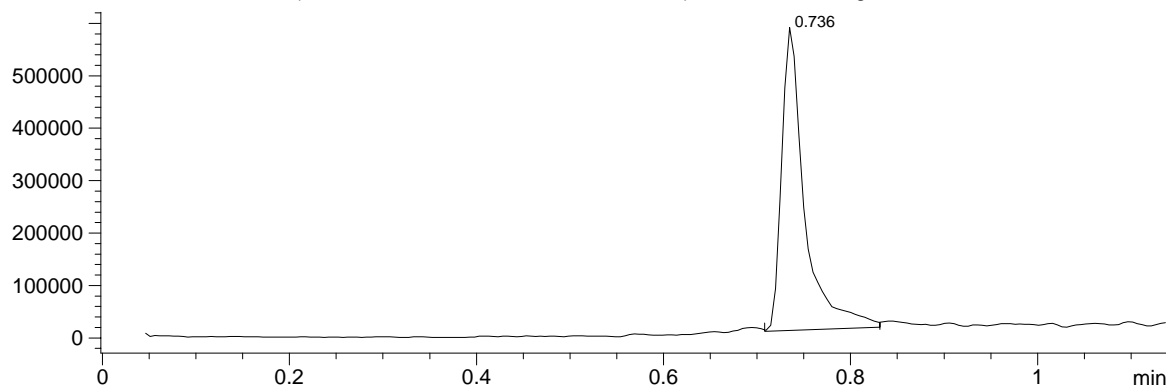

\*MSD1 SPC, time=0.735 of D:\DATE\11\_14\11\_13\_07\SAMPL050.D APCI, Scan, Frag: 120

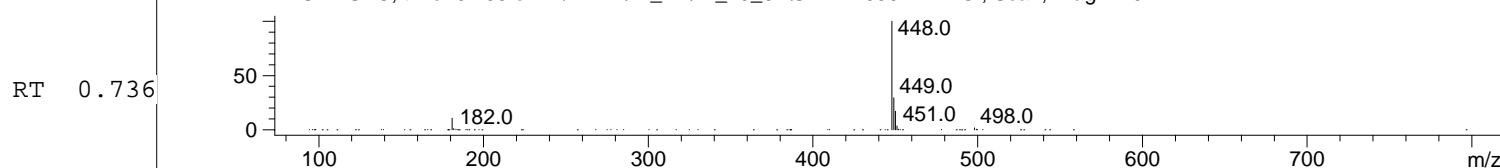

Supplement: data2 [file elife-70700-data2-v2.zip]
