# Supplementary material for: Selective androgen receptor degrader (SARD) to overcome antiandrogen resistance in castration-resistant prostate cancer
Source: eLife journal article supplement (doi:10.7554/elife.70700), 2023-01-19
Supplement: data2 [file elife-70700-data2-v2.zip]

## SAMPLE INFORMATION

|                   |                               |                     |               |
|-------------------|-------------------------------|---------------------|---------------|
| Sample Name:      | 220127-57-1 Imatinib Mesylate | Acquired By:        | System        |
| Sample Type:      | Unknown                       |                     |               |
| Vial:             | 1                             | Acq. Method Set:    | YZR           |
| Injection #:      | 16                            | Processing Method   | 270           |
| Injection Volume: | 20.00 ul                      | Channel Name:       | 2487Channel 1 |
| Run Time:         | 30.0 Minutes                  | Proc. Chnl. Descr.: | 270           |
| Sample Set Name:  |                               |                     |               |

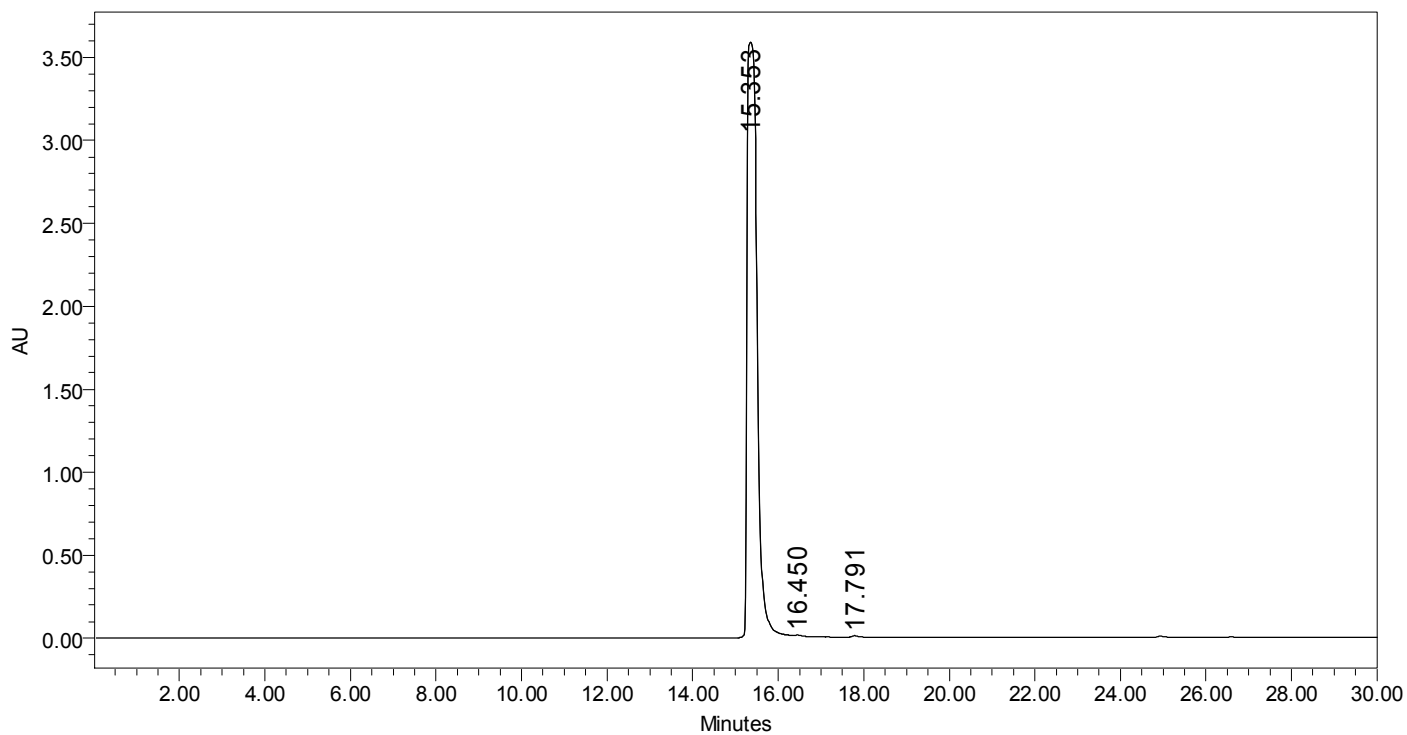

|   | RT     | Area     | % Area | Height  |
|---|--------|----------|--------|---------|
| 1 | 15.353 | 57856600 | 99.61  | 3589812 |
| 2 | 16.450 | 131789   | 0.23   | 11224   |
| 3 | 17.791 | 95690    | 0.16   | 8588    |
