# Supplementary material for: Selective androgen receptor degrader (SARD) to overcome antiandrogen resistance in castration-resistant prostate cancer
Source: eLife journal article supplement (doi:10.7554/elife.70700), 2023-01-19

MaxPeak: 90.07%  
Ret\_Time: 1.174 min

3123513\$2

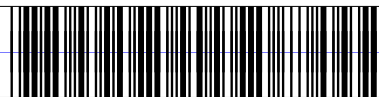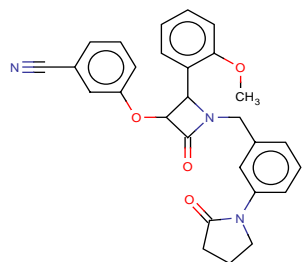

Mol Wt 467.516  
Exact Mass 467.21

| # | Time  | Area% |
|---|-------|-------|
| 1 | 1.174 | 90.07 |
| 2 | 1.200 | 9.93  |

DAD1 A, Sig=215,10 Ref=off (29\_12\12\_24\_08\SAMPL025.D)

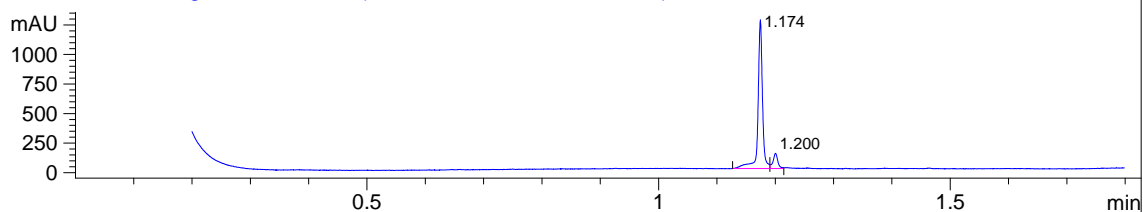

DAD1 B, Sig=254,10 Ref=off (29\_12\12\_24\_08\SAMPL025.D)

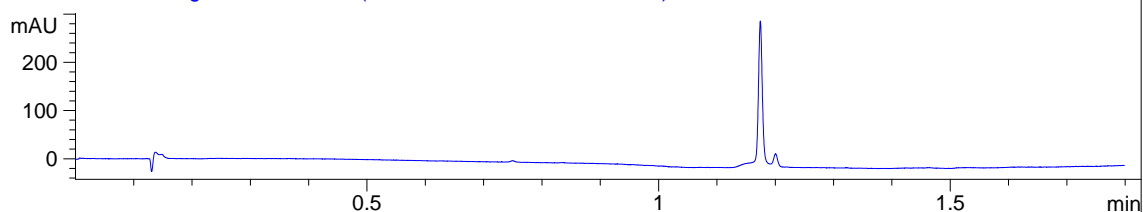

MSD1 TIC, MS File (C:\CHEM32\1\DATA\29\_12\12\_24\_08\SAMPL025.D) MM-APCI, Fast Scan, Frag: 120, "pos"

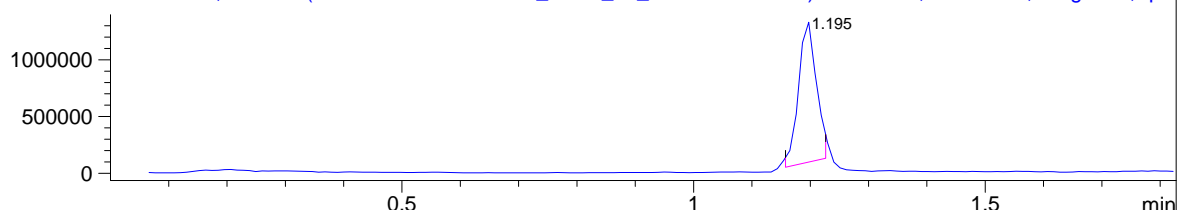

MSD2 TIC, MS File (C:\CHEM32\1\DATA\29\_12\12\_24\_08\SAMPL025.D) MM-APCI, Fast Scan, Frag: 120, "neg"

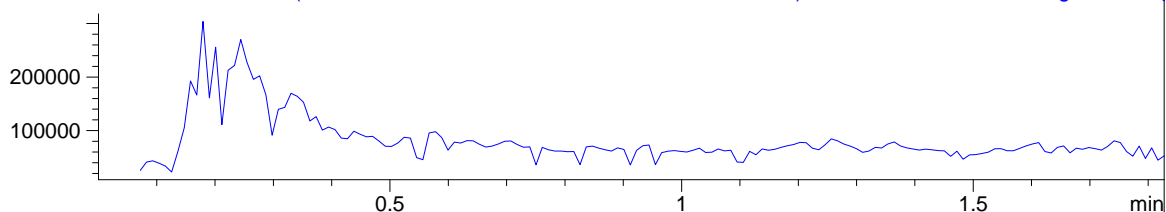

ADC1 A, ELSD (29\_12\12\_24\_08\SAMPL025.D)

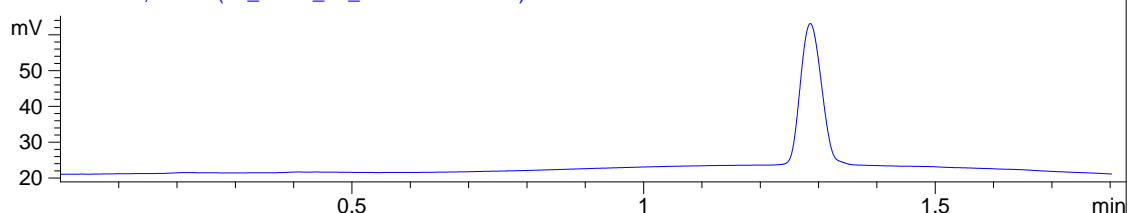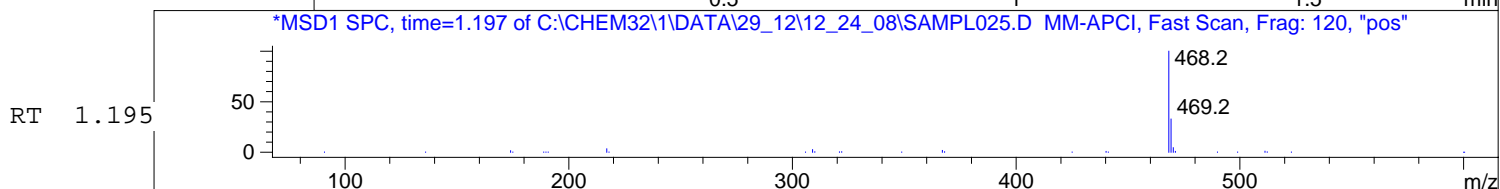

Supplement: data2 [file elife-70700-data2-v2.zip]
