# Supplementary material for: Selective androgen receptor degrader (SARD) to overcome antiandrogen resistance in castration-resistant prostate cancer
Source: eLife journal article supplement (doi:10.7554/elife.70700), 2023-01-19
Supplement: data2 [file elife-70700-data2-v2.zip]

Sample: 136  
File: 8324\_36  
Vial: D/5

Date: 27-Feb-2004  
Time: 16:39:52  
Description: 909640

Page 1.  
AMRI code: ALB-H05204887  
Vial label: M5173042AMS0020

## DAD: 220

max. intensity: 4E6

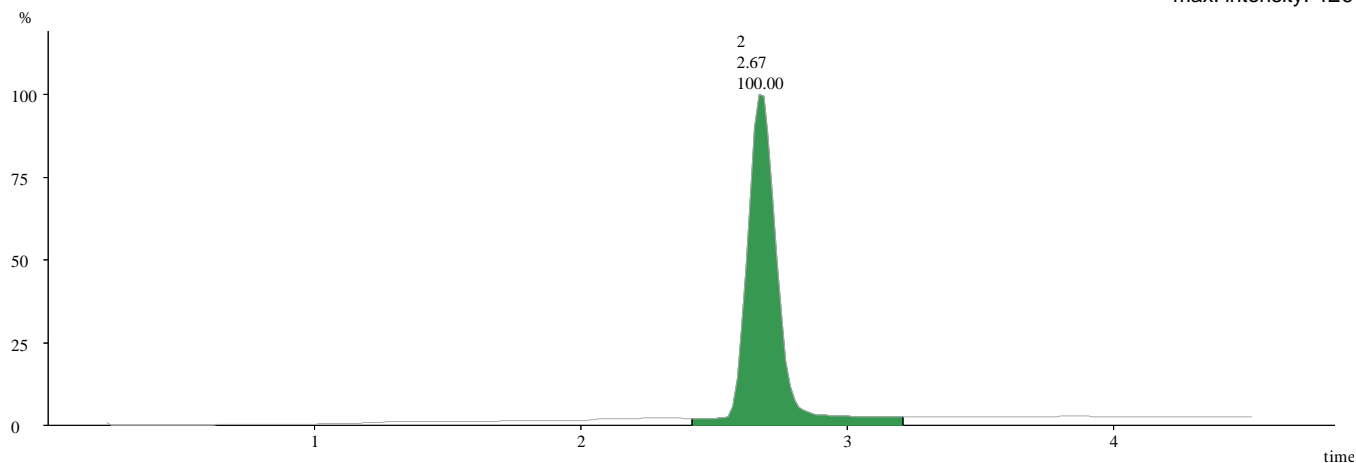

| Peak_ID | Peak      | Area | Area% | Height | Time | Mass Found |
|---------|-----------|------|-------|--------|------|------------|
| 2       | 2.42 3.21 | 5.E5 | 100   | 4.E6   | 2.67 | 524.27     |

## MS ES+ :542.27+525.27

max. intensity: 5.3E4

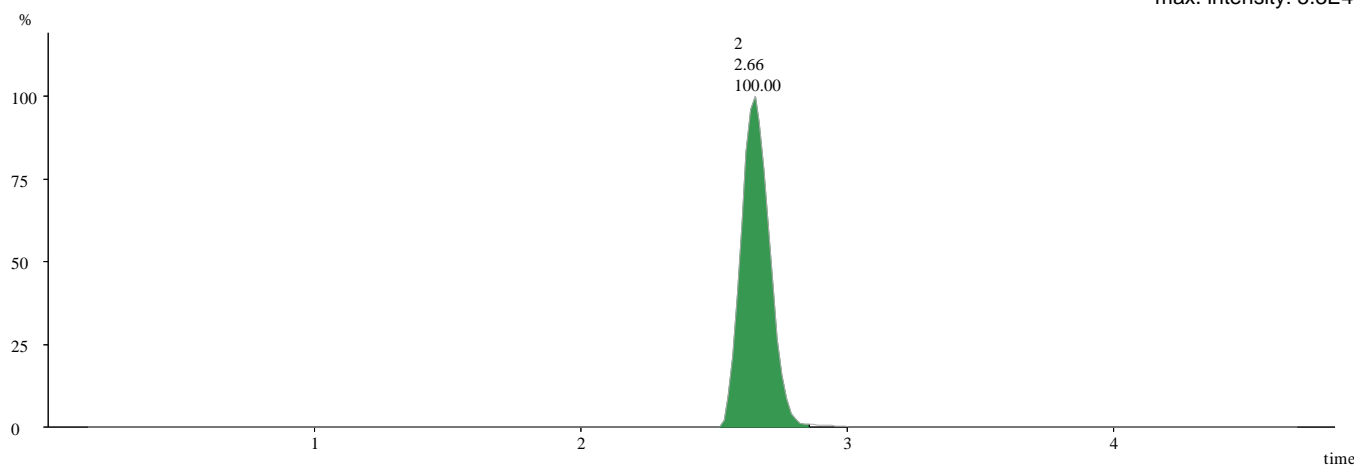

| Peak_ID | Peak      | Area | Area% | Height | Time | Mass Found |
|---------|-----------|------|-------|--------|------|------------|
| 2       | 2.52 2.86 | 7.E3 | 100   | 5.E4   | 2.66 | 524.27     |

Sample: 136  
File: 8324\_36  
Vial: D/5

Date: 27-Feb-2004  
Time: 16:39:52  
Description: 909640

Page 2.  
AMRI code: ALB-H05204887  
Vial label: M5173042AMS0020

## MS ES+ :TIC

max. intensity: 7.1E4

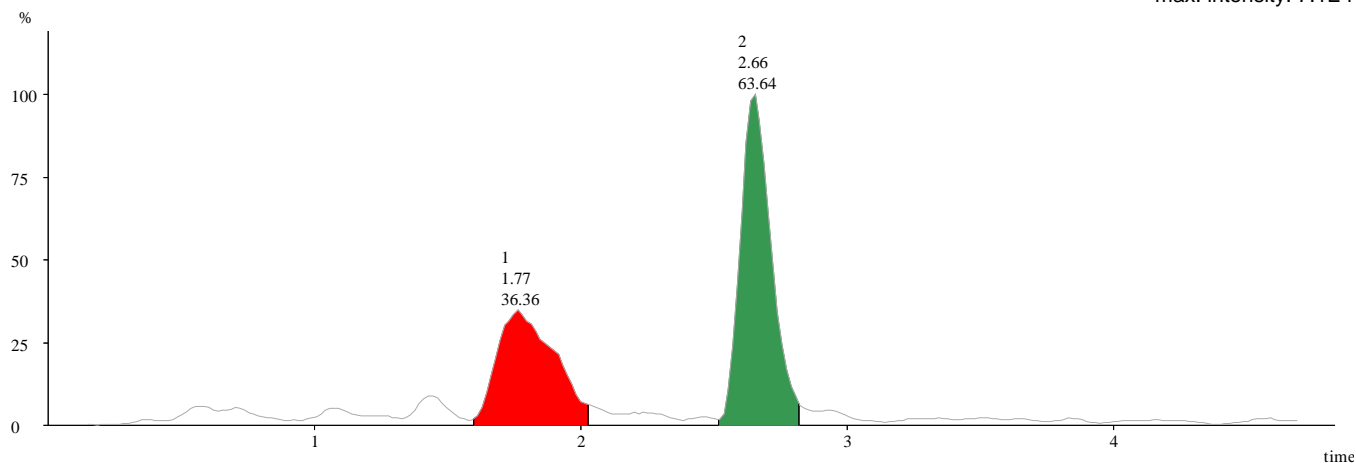

| Peak_ID | Peak      | Area | Area% | Height | Time | Mass Found |
|---------|-----------|------|-------|--------|------|------------|
| 1       | 1.60 2.03 | 5.E3 | 36.36 | 2.E4   | 1.77 |            |
| 2       | 2.52 2.82 | 9.E3 | 63.64 | 7.E4   | 2.66 | 524.27     |

## MS: ES+

Combine (157:159-(146:148+172:174))

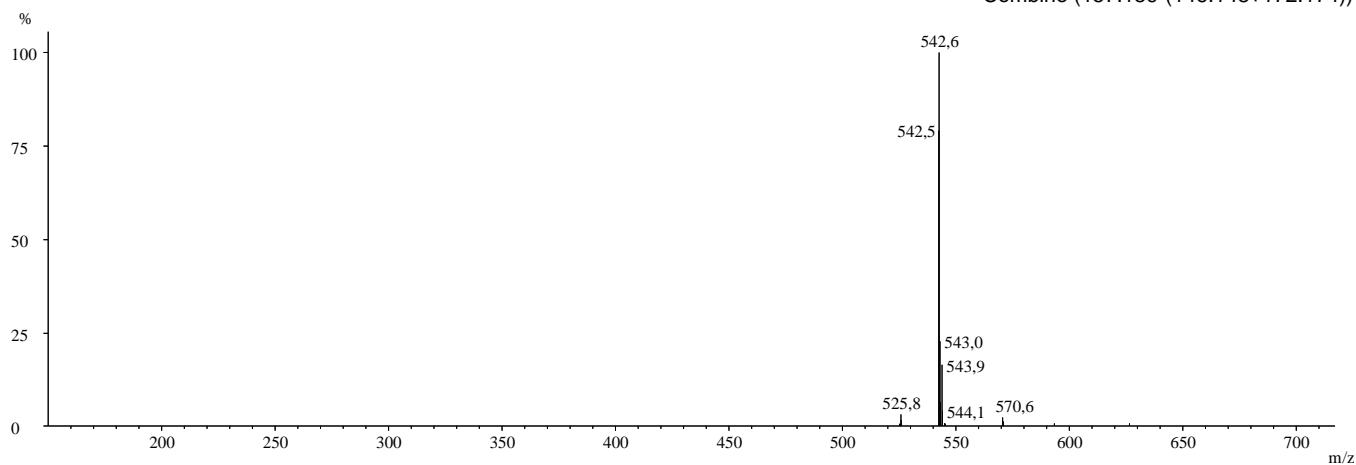

| Peak_ID | Compound | Time | Mass found |
|---------|----------|------|------------|
| 2       | Found    | 2.66 | 524.2700   |
