# Supplementary material for: Selective androgen receptor degrader (SARD) to overcome antiandrogen resistance in castration-resistant prostate cancer
Source: eLife journal article supplement (doi:10.7554/elife.70700), 2023-01-19

|                        |             |                |                                                                 |                        |             |
|------------------------|-------------|----------------|-----------------------------------------------------------------|------------------------|-------------|
| Acquisition Time (sec) | 2.9884      | Comment        | 2009765-112207-D                                                | Date                   | Jul 22 2016 |
| Date Stamp             | Jul 22 2016 | File Name      | D:\20160720-KG 112207-D_20160722_01\112207-D_PSLABEL_01.FID.FID |                        |             |
| Frequency (MHz)        | 499.91      | Nucleus        | 1H                                                              | Number of Transients   | 16          |
| Points Count           | 32768       | Pulse Sequence | s2pul                                                           | Receiver Gain          | 46.00       |
| Spectrum Offset (Hz)   | 4504.6592   | Spectrum Type  | STANDARD                                                        | Sweep Width (Hz)       | 10964.91    |
|                        |             |                |                                                                 | Solvent                | DMSO-d6     |
|                        |             |                |                                                                 | Temperature (degree C) | 25.000      |

$^1\text{H}$  NMR (500 MHz, DMSO- $d_6$ )  $\delta$  ppm 10.18 (s, 1 H) 9.37 (br. s., 1 H) 9.28 (d,  $J=1.67$  Hz, 1 H) 8.98 (s, 1 H) 8.69 (dd,  $J=4.69, 1.67$  Hz, 1 H) 8.52 (d,  $J=5.02$  Hz, 1 H) 8.48 (dt,  $J=8.03, 1.84$  Hz, 1 H) 8.08 (d,  $J=2.01$  Hz, 1 H) 7.95 (d,  $J=8.03$  Hz, 2 H) 7.53 (dd,  $J=8.03, 4.68$  Hz, 1 H) 7.47 - 7.51 (m, 2 H) 7.46 (br. s., 1 H) 7.43 (d,  $J=5.02$  Hz, 1 H) 7.21 (d,  $J=8.37$  Hz, 1 H) 3.65 (br. s., 2 H) 3.40 (br. s., 2 H) 3.04 (br. s., 2 H) 2.93 (d,  $J=10.71$  Hz, 2 H) 2.79 (br. s., 3 H) 2.25 - 2.44 (m, 5 H) 2.23 (s, 3 H)

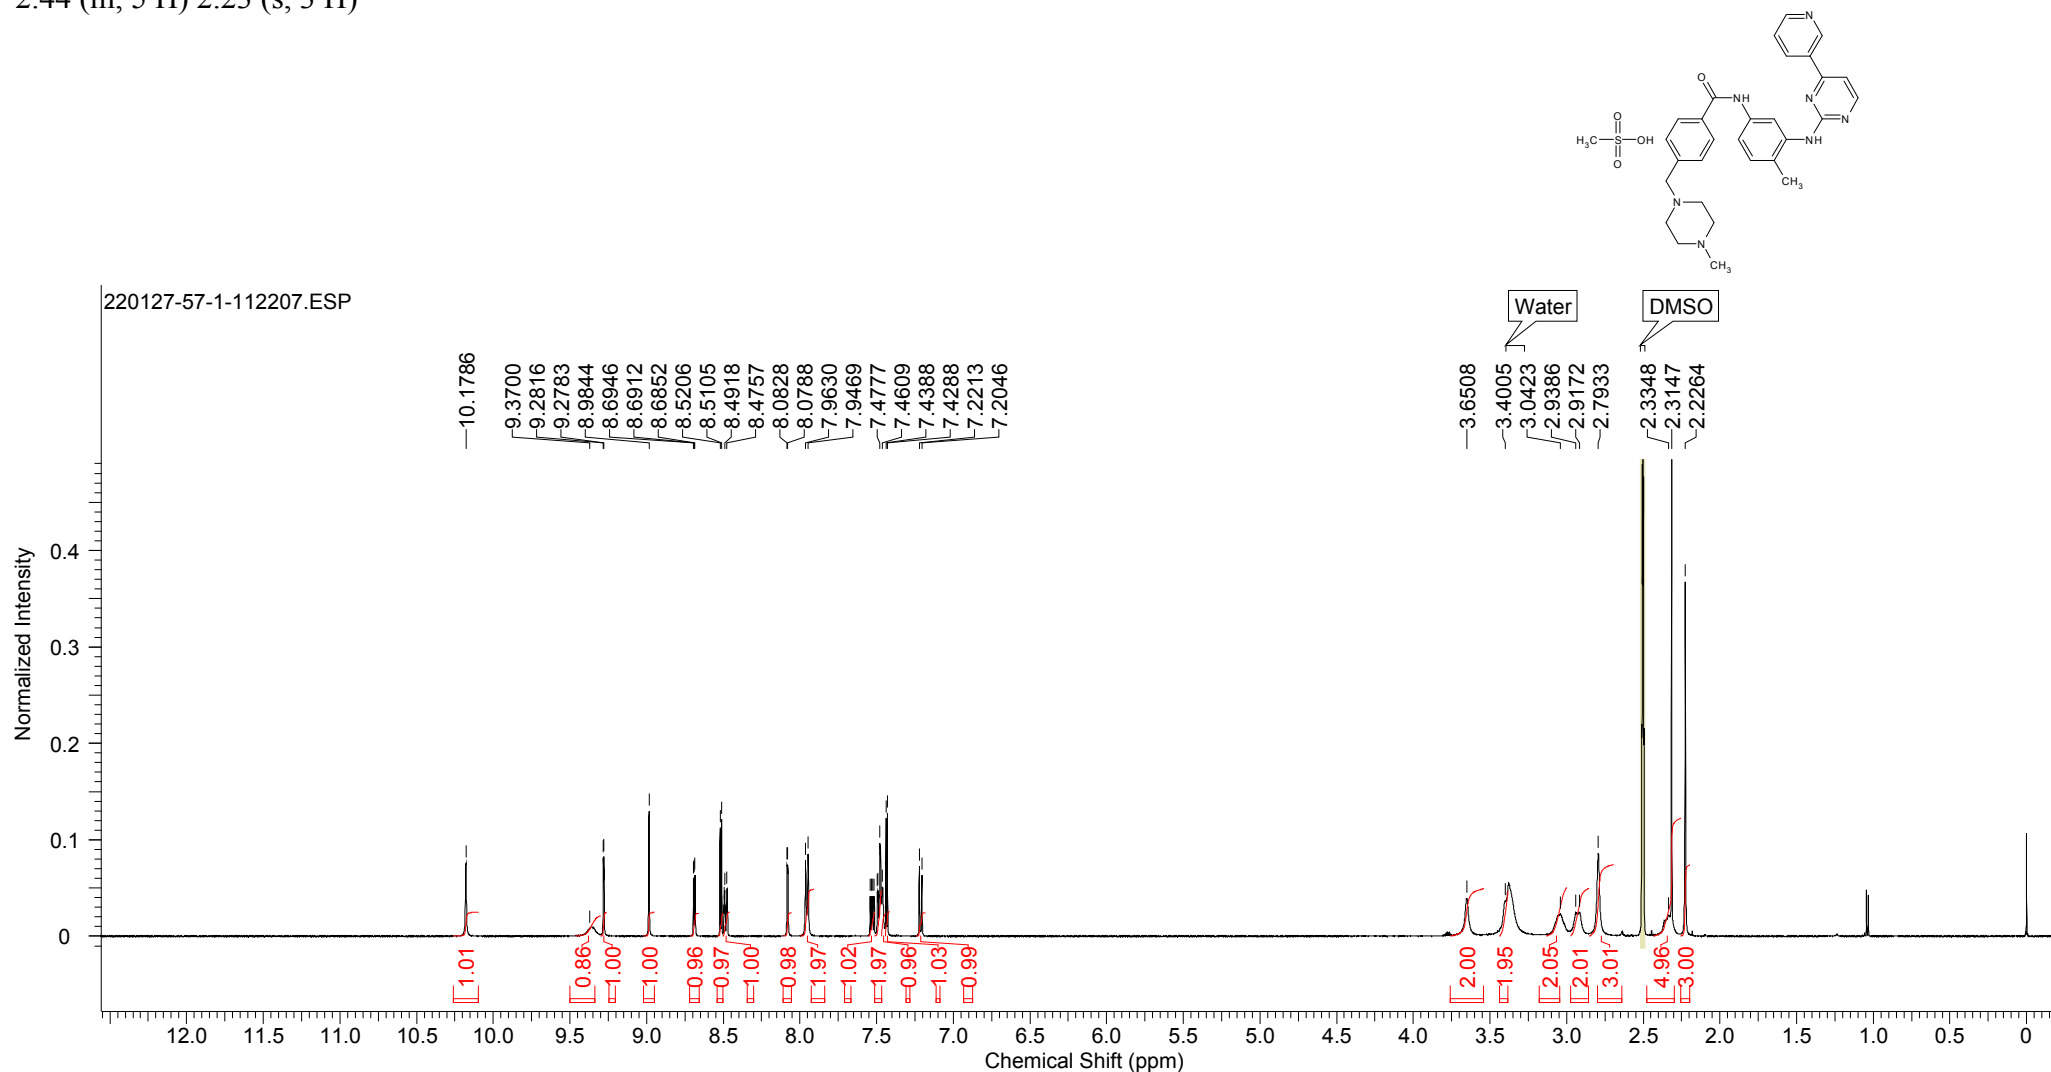

Supplement: data2 [file elife-70700-data2-v2.zip]
