# Supplementary material for: Selective androgen receptor degrader (SARD) to overcome antiandrogen resistance in castration-resistant prostate cancer
Source: eLife journal article supplement (doi:10.7554/elife.70700), 2023-01-19
Supplement: data2 [file elife-70700-data2-v2.zip]

Sample: 119  
File: Ar20357\_32  
Vial: C/3

Date: 20-Jun-2007  
Time: 06:22:29  
Description: 20583426

Page 1.  
AMRI code: ALB-H10713478  
Vial label: 222991-1

## DAD: 220

max. intensity: 1.2E6

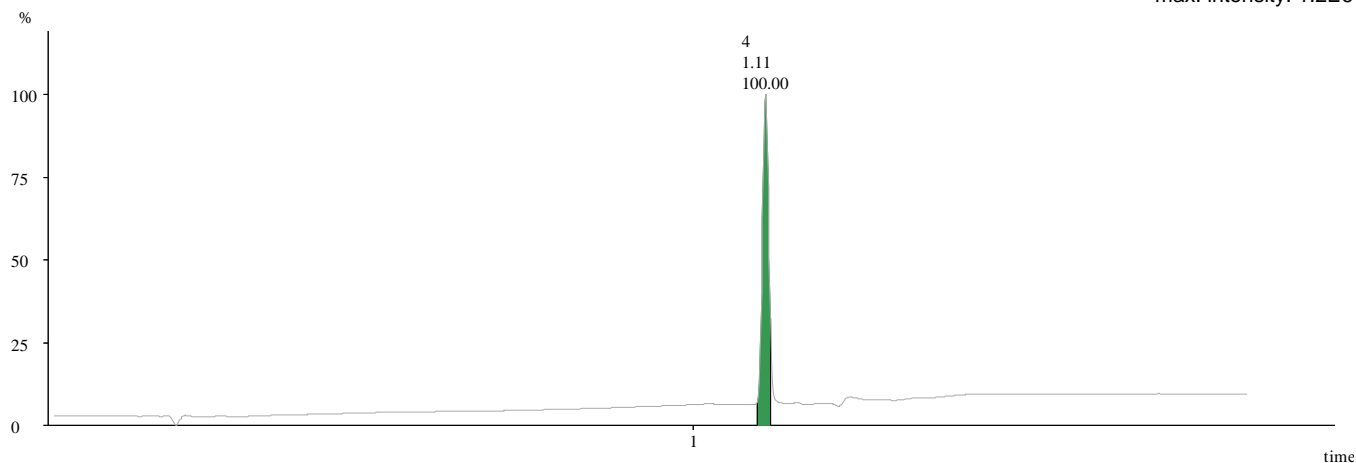

| Peak_ID | Peak      | Area | Area% | Height | Time | Mass Found |
|---------|-----------|------|-------|--------|------|------------|
| 4       | 1.10 1.12 | 1.E4 | 100   | 1.E6   | 1.11 | 540.24     |

## MS ES+ :543.24+1081.48+558.24+541.24

max. intensity: 6.1E6

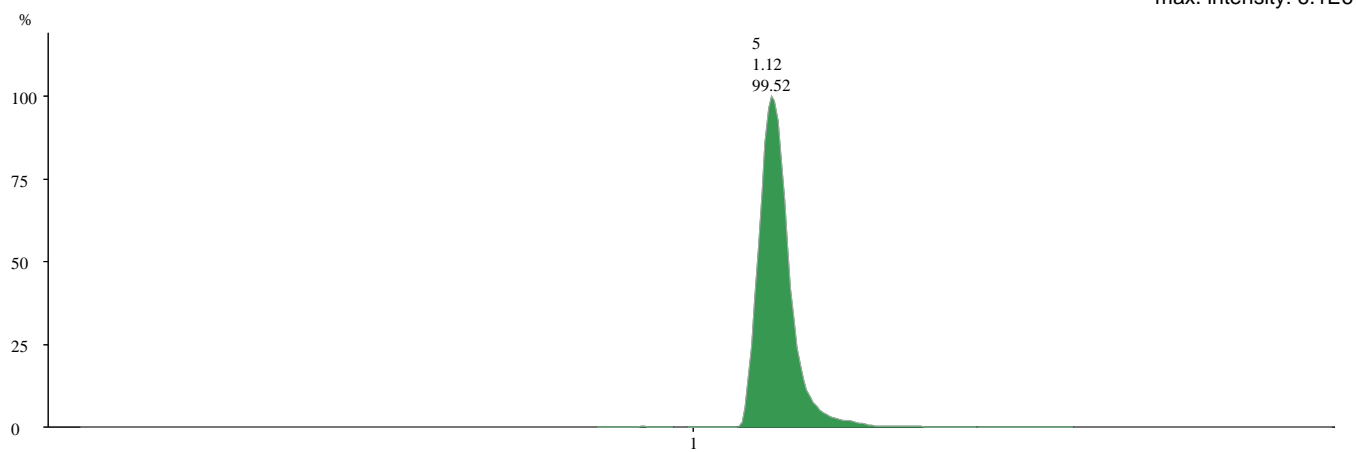

| Peak_ID | Peak      | Area | Area% | Height | Time | Mass Found |
|---------|-----------|------|-------|--------|------|------------|
| 2       | 0.85 0.97 | 7.E2 | 0.21  | 2.E4   | 0.92 | 540.24     |
| 3       | 0.99 1.07 | 5.E2 | 0.14  | 1.E4   | 1.04 | 540.24     |
| 5       | 1.07 1.44 | 3.E5 | 99.52 | 6.E6   | 1.12 | 540.24     |
| 7       | 1.44 1.59 | 4.E2 | 0.11  | 5.E3   | 1.49 | 540.24     |
| 9       | 1.71 1.80 | 5.E1 | 0.02  | 1.E3   | 1.75 | 540.24     |

Sample: 119  
File: Ar20357\_32  
Vial: C/3

Date: 20-Jun-2007  
Time: 06:22:29  
Description: 20583426

Page 2.  
AMRI code: ALB-H10713478  
Vial label: 222991-1

## MS ES+ :TIC

max. intensity: 9.6E6

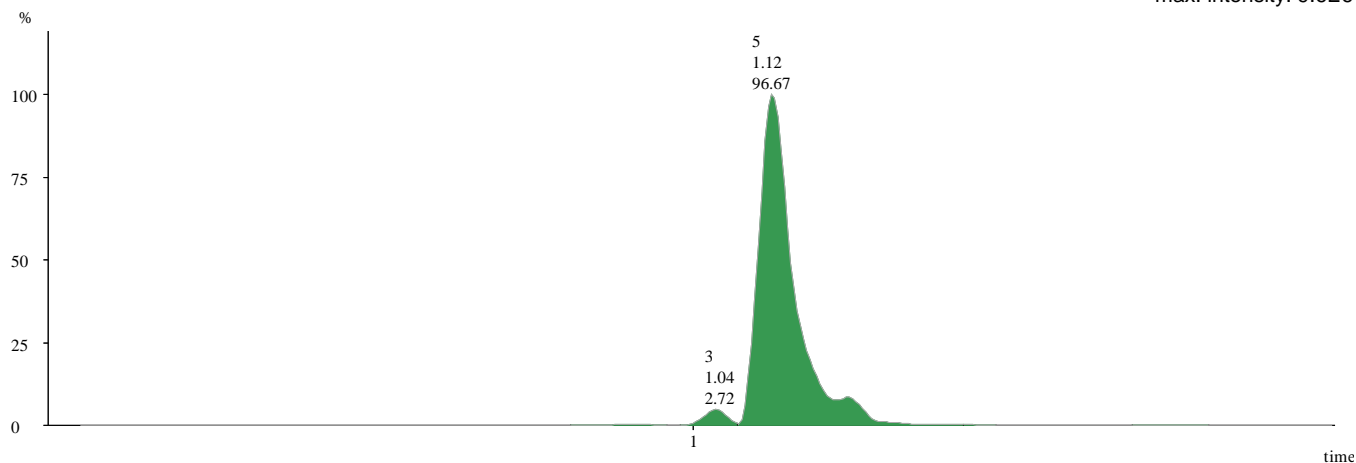

| Peak_ID | Peak      | Area | Area% | Height | Time | Mass Found |
|---------|-----------|------|-------|--------|------|------------|
| 1       | 0.81 0.96 | 3.E3 | 0.47  | 5.E4   | 0.91 | 540.24     |
| 3       | 0.98 1.07 | 2.E4 | 2.72  | 4.E5   | 1.04 | 540.24     |
| 5       | 1.07 1.42 | 6.E5 | 96.67 | 1.E7   | 1.12 | 540.24     |
| 6       | 1.42 1.47 | 3.E2 | 0.05  | 1.E4   | 1.43 | 540.24     |
| 8       | 1.68 1.80 | 6.E2 | 0.1   | 1.E4   | 1.73 | 540.24     |

## MS: ES+

Combine (217:223-(204:210+231:237))

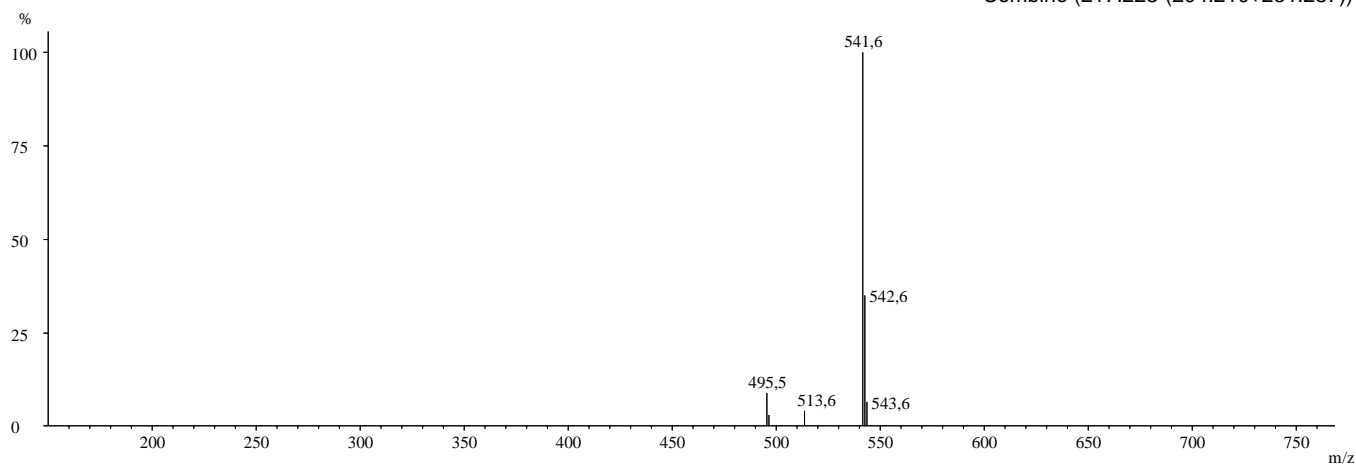

| Peak_ID | Compound | Time | Mass found |
|---------|----------|------|------------|
| 4       | Found    | 1.11 | 540.2400   |
