# Supplementary material for: Selective androgen receptor degrader (SARD) to overcome antiandrogen resistance in castration-resistant prostate cancer
Source: eLife journal article supplement (doi:10.7554/elife.70700), 2023-01-19
Supplement: data2 [file elife-70700-data2-v2.zip]

Sample: 185  
File: Ar23492\_85  
Vial: E/11

Date: 22-Apr-2008  
Time: 02:50:28  
Description: 10165737

Page 1.  
AMRI code: ALB-H01332277  
Vial label: M1305155ACC0031

## (1) ELSD Signal

max. intensity: 6.3E5

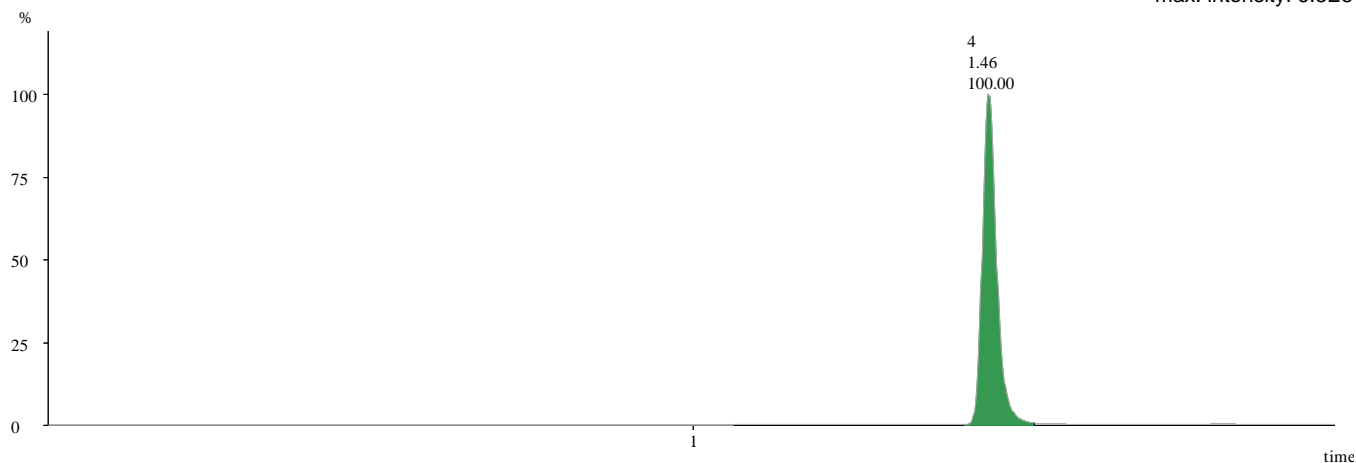

| Peak_ID | Peak      | Area | Area% | Height | Time | Mass Found |
|---------|-----------|------|-------|--------|------|------------|
| 4       | 1.42 1.53 | 2.E4 | 100   | 6.E5   | 1.46 | 520.26     |

## DAD: 220

max. intensity: 1.7E6

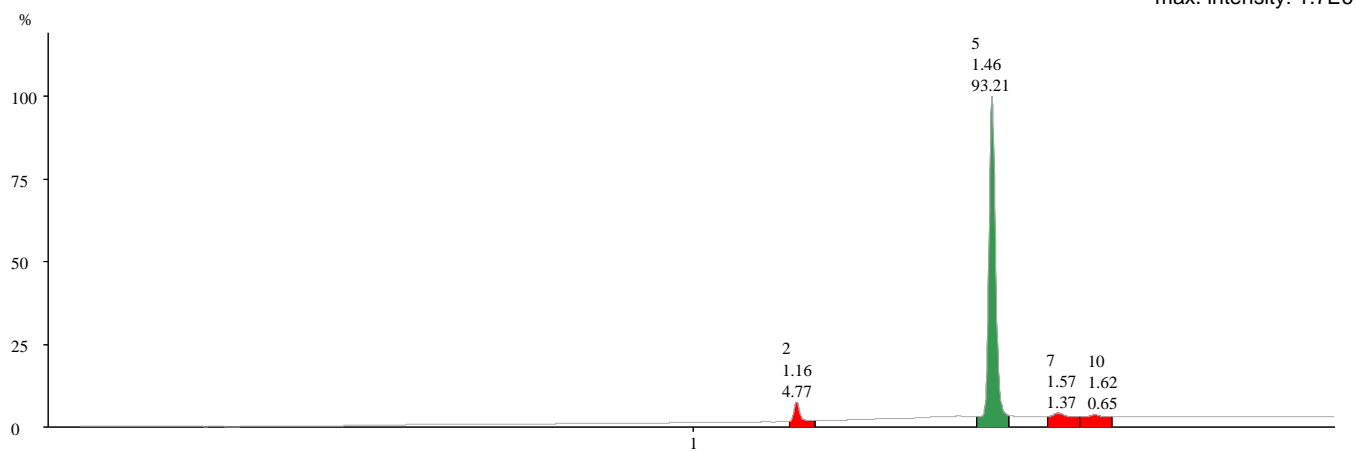

| Peak_ID | Peak      | Area | Area% | Height | Time | Mass Found |
|---------|-----------|------|-------|--------|------|------------|
| 2       | 1.15 1.19 | 1.E3 | 4.77  | 1.E5   | 1.16 |            |
| 5       | 1.44 1.49 | 2.E4 | 93.21 | 2.E6   | 1.46 | 520.26     |
| 7       | 1.55 1.60 | 3.E2 | 1.37  | 2.E4   | 1.57 |            |
| 10      | 1.60 1.65 | 1.E2 | 0.65  | 1.E4   | 1.62 |            |

Sample: 185  
File: Ar23492\_85  
Vial: E/11

Date: 22-Apr-2008  
Time: 02:50:28  
Description: 10165737

Page 2.  
AMRI code: ALB-H01332277  
Vial label: M1305155ACC0031

## MS AP+ :1041.52+538.26+521.26

max. intensity: 4.1E7

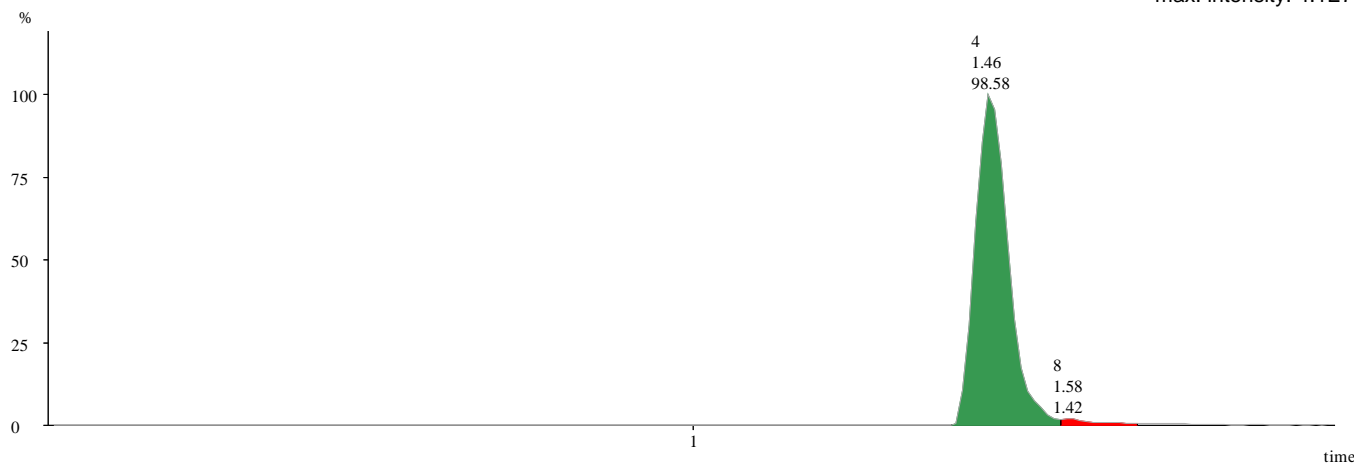

| Peak_ID | Peak      | Area | Area% | Height | Time | Mass Found |
|---------|-----------|------|-------|--------|------|------------|
| 4       | 1.40 1.57 | 2.E6 | 98.58 | 4.E7   | 1.46 | 520.26     |
| 8       | 1.57 1.69 | 4.E4 | 1.42  | 7.E5   | 1.58 |            |

## MS AP+ :TIC

max. intensity: 9.9E7

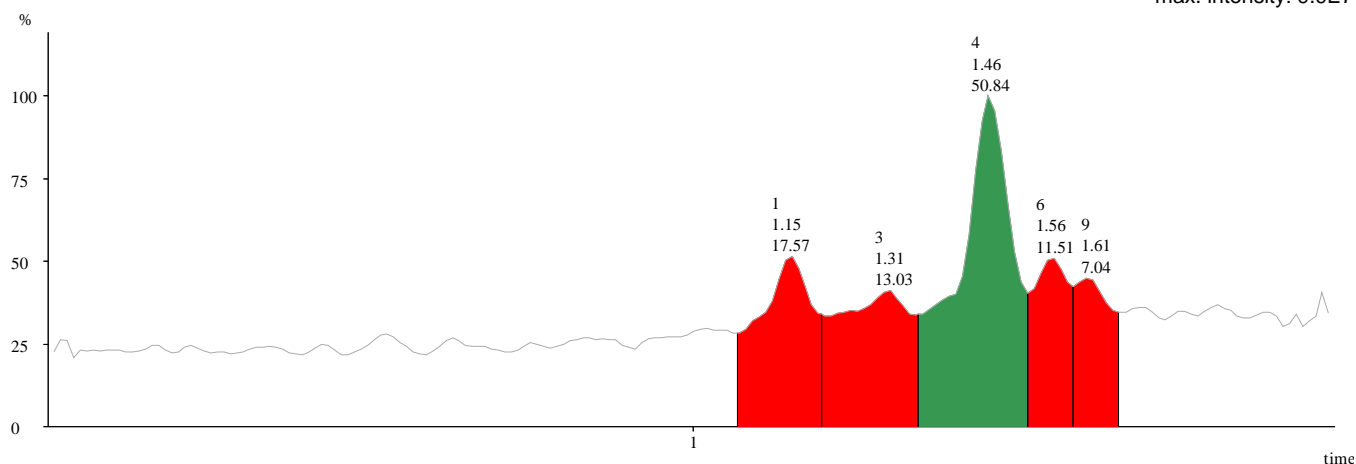

| Peak_ID | Peak      | Area | Area% | Height | Time | Mass Found |
|---------|-----------|------|-------|--------|------|------------|
| 1       | 1.07 1.20 | 2.E6 | 17.57 | 2.E7   | 1.15 |            |
| 3       | 1.20 1.35 | 1.E6 | 13.03 | 1.E7   | 1.31 |            |
| 4       | 1.35 1.52 | 5.E6 | 50.84 | 7.E7   | 1.46 | 520.26     |
| 6       | 1.52 1.59 | 1.E6 | 11.51 | 2.E7   | 1.56 |            |
| 9       | 1.59 1.66 | 7.E5 | 7.04  | 1.E7   | 1.61 |            |

Sample: 185  
File: Ar23492\_85  
Vial: E/11

Date: 22-Apr-2008  
Time: 02:50:28  
Description: 10165737

Page 3.  
AMRI code: ALB-H01332277  
Vial label: M1305155ACC0031

## MS: AP+

Combine (113:116-(106:109+121:124))

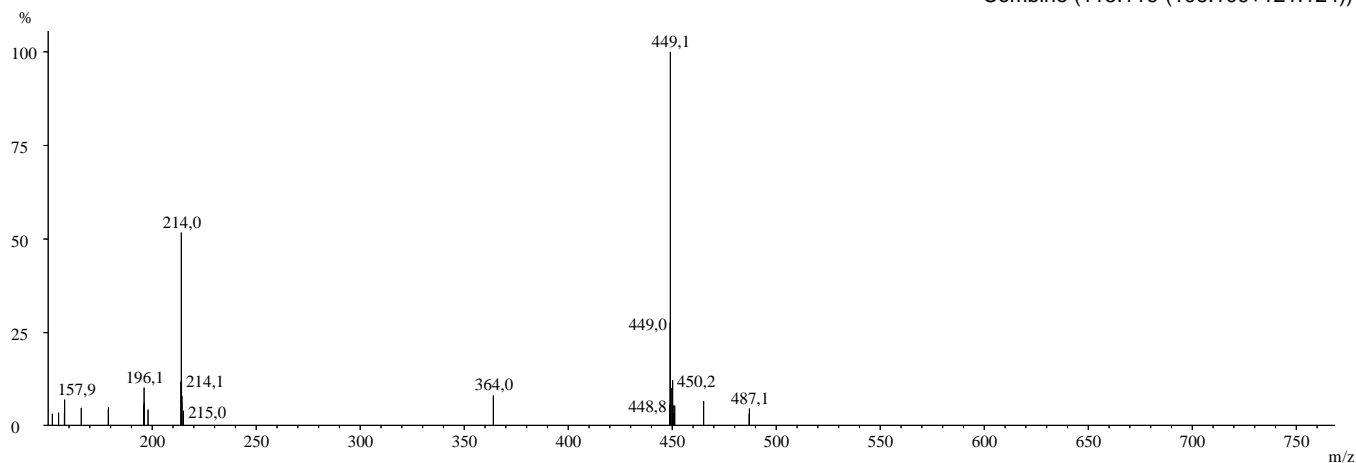

| Peak_ID | Compound | Time | Mass found |
|---------|----------|------|------------|
| 2       |          | 1.16 |            |

## MS: AP+

Combine (143:146-(136:139+151:154))

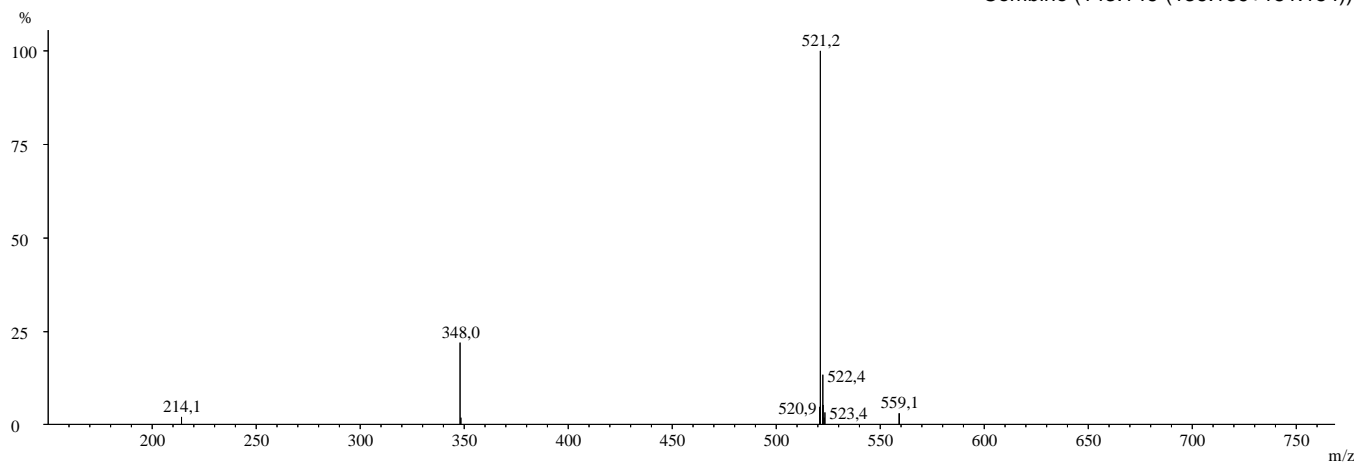

| Peak_ID | Compound | Time | Mass found |
|---------|----------|------|------------|
| 5       | Found    | 1.46 | 520.2600   |

Sample: 185  
File: Ar23492\_85  
Vial: E/11

Date: 22-Apr-2008  
Time: 02:50:28  
Description: 10165737

Page 4.  
AMRI code: ALB-H01332277  
Vial label: M1305155ACC0031

# **MS: AP+**

Combine (153:156-(146:149+162:165))

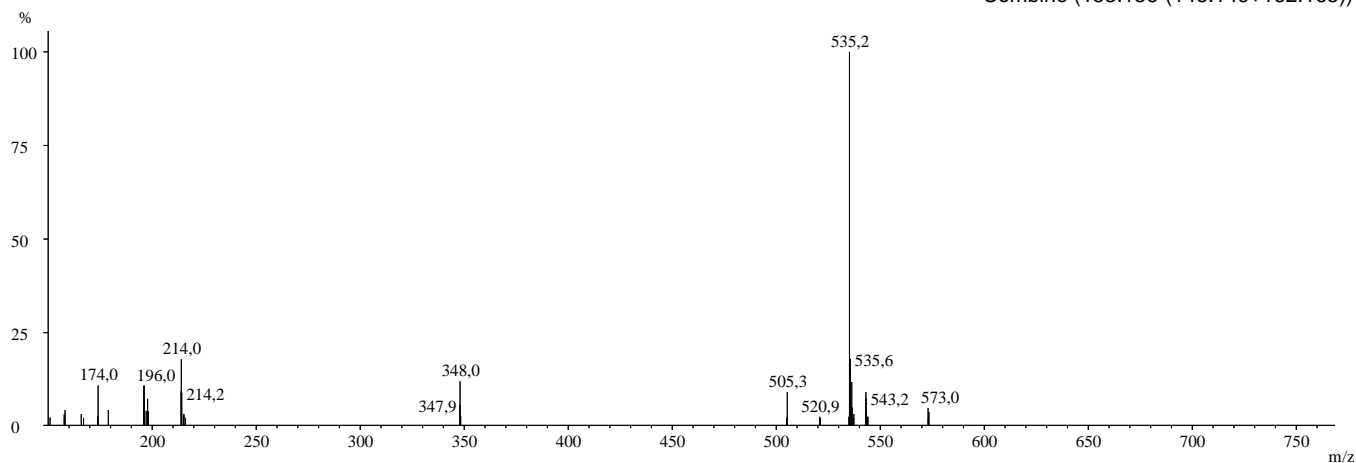

| Peak_ID | Compound | Time | Mass found |
|---------|----------|------|------------|
| 7       |          | 1.57 |            |
