# Supplementary material for: Selective androgen receptor degrader (SARD) to overcome antiandrogen resistance in castration-resistant prostate cancer
Source: eLife journal article supplement (doi:10.7554/elife.70700), 2023-01-19

MaxPeak: 98.23%  
Ret\_Time: 0.524 min

1754730

OK

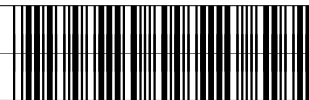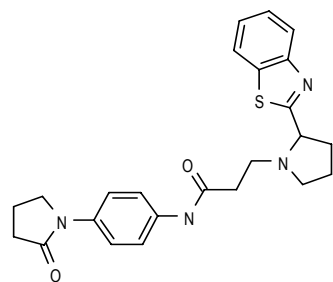

mw = 434.56

| # | Time  | Area% |
|---|-------|-------|
| 1 | 0.499 | 1.77  |
| 2 | 0.524 | 98.23 |

DAD1 A, Sig=215,10 Ref=off (D:\DATA\09\_10\09\_10\_09\SAMPL020.D)

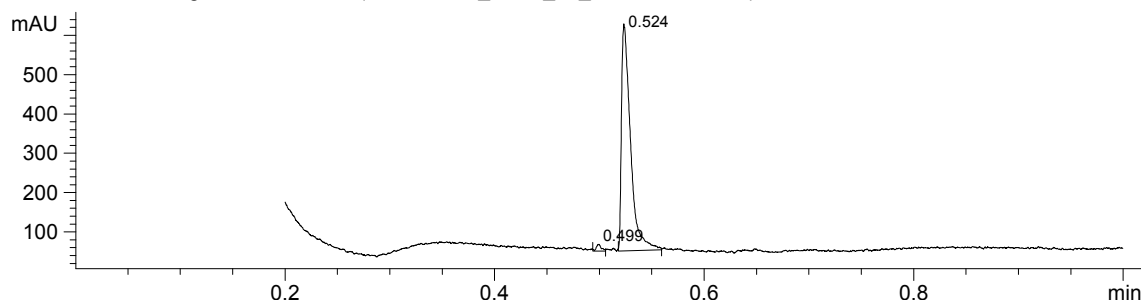

MSD1 TIC, MS File (D:\DATA\09\_10\09\_10\_09\SAMPL020.D) MM-APCI, Fast Scan, Frag: 120, "pos"

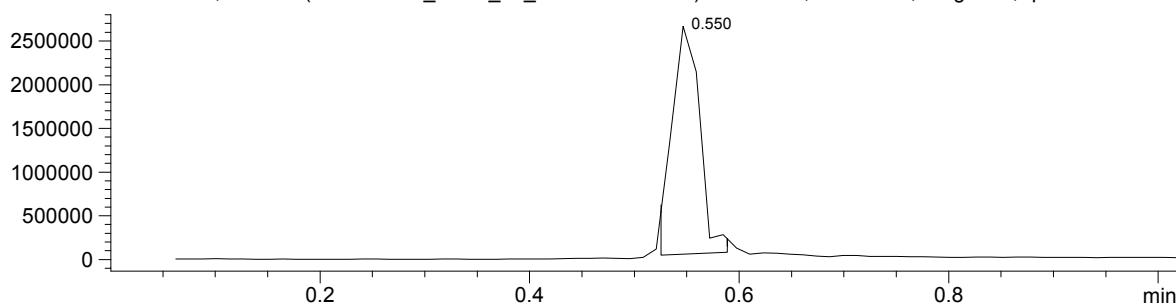

ADC1 A, ELSD (D:\DATA\09\_10\09\_10\_09\SAMPL020.D)

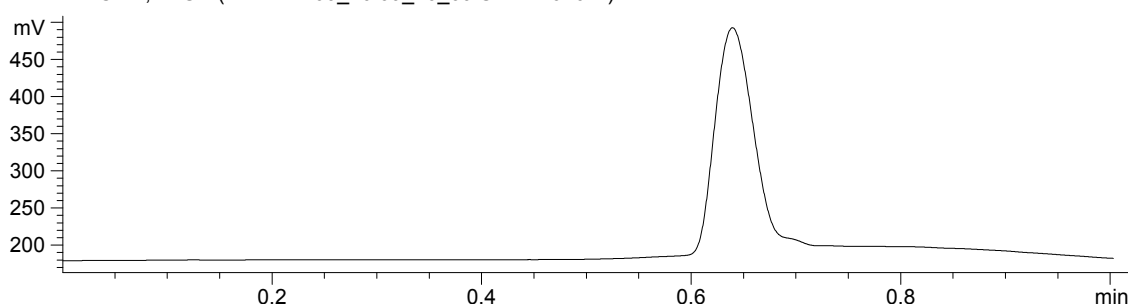

\*MSD1 SPC, time=0.546 of D:\DATA\09\_10\09\_10\_09\SAMPL020.D MM-APCI, Fast Scan, Frag: 120, "pos"

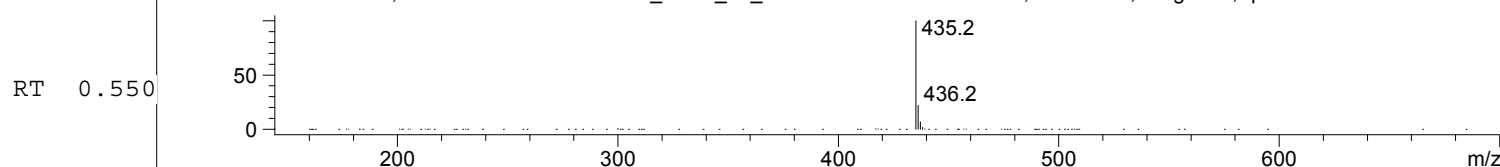

Supplement: data2 [file elife-70700-data2-v2.zip]
