# Supplementary material for: Selective androgen receptor degrader (SARD) to overcome antiandrogen resistance in castration-resistant prostate cancer
Source: eLife journal article supplement (doi:10.7554/elife.70700), 2023-01-19

MaxPeak: 100.00%  
Ret\_Time: 0.717 min

1910060

OK

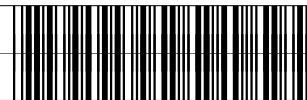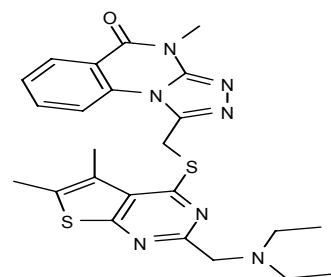

mw = 493.66

| # | Time  | Area%  |
|---|-------|--------|
| 1 | 0.717 | 100.00 |

DAD1 A, Sig=215,10 Ref=off (D:\DATA\09\_11\09\_11\_18\SAMPL020.D)

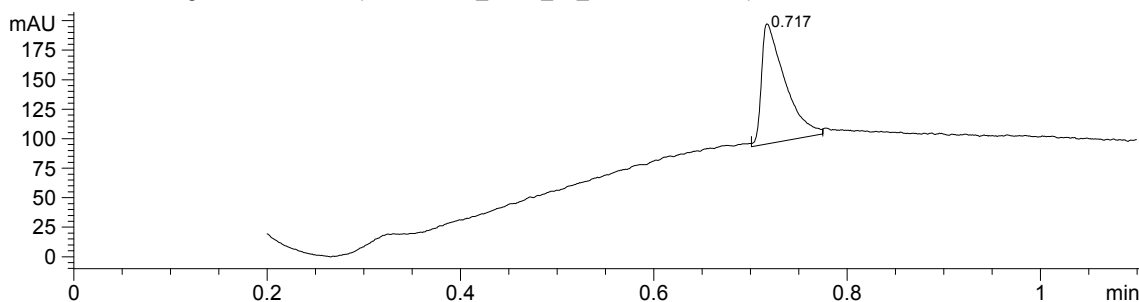

MSD1 TIC, MS File (D:\DATA\09\_11\09\_11\_18\SAMPL020.D) APCI, Scan, Frag: 120, "Pos"

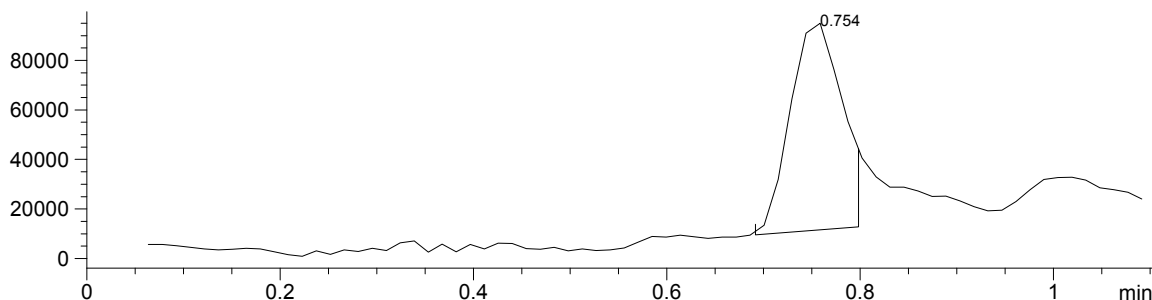

ADC1 A, ADC1 ELSD (D:\DATA\09\_11\09\_11\_18\SAMPL020.D)

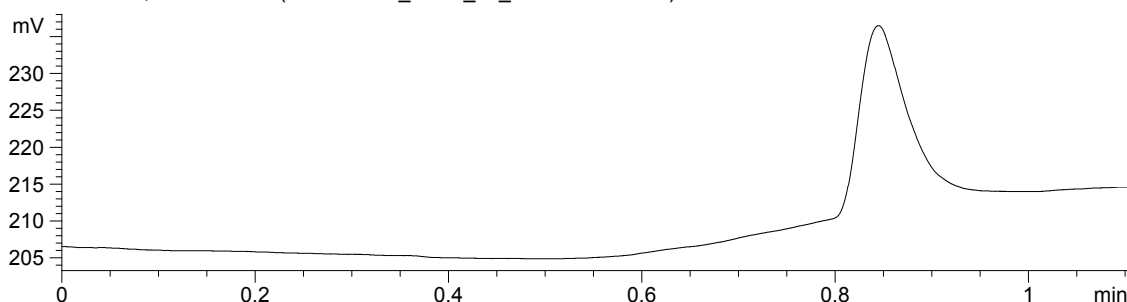

\*MSD1 SPC, time=0.759 of D:\DATA\09\_11\09\_11\_18\SAMPL020.D APCI, Scan, Frag: 120, "Pos"

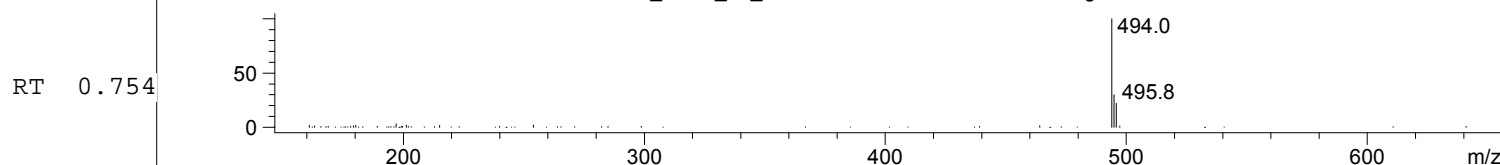

Supplement: data2 [file elife-70700-data2-v2.zip]
