# Supplementary material for: Selective androgen receptor degrader (SARD) to overcome antiandrogen resistance in castration-resistant prostate cancer
Source: eLife journal article supplement (doi:10.7554/elife.70700), 2023-01-19

/nmru vt02274 ivx07891

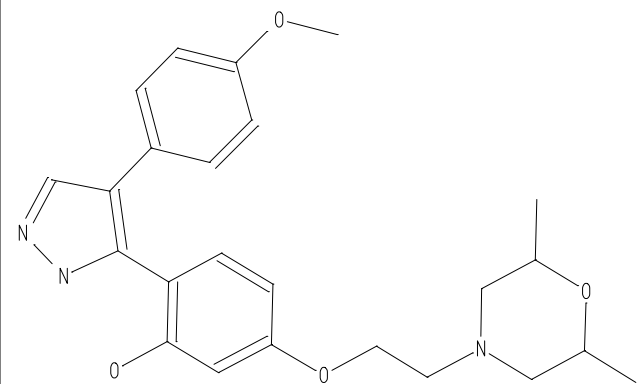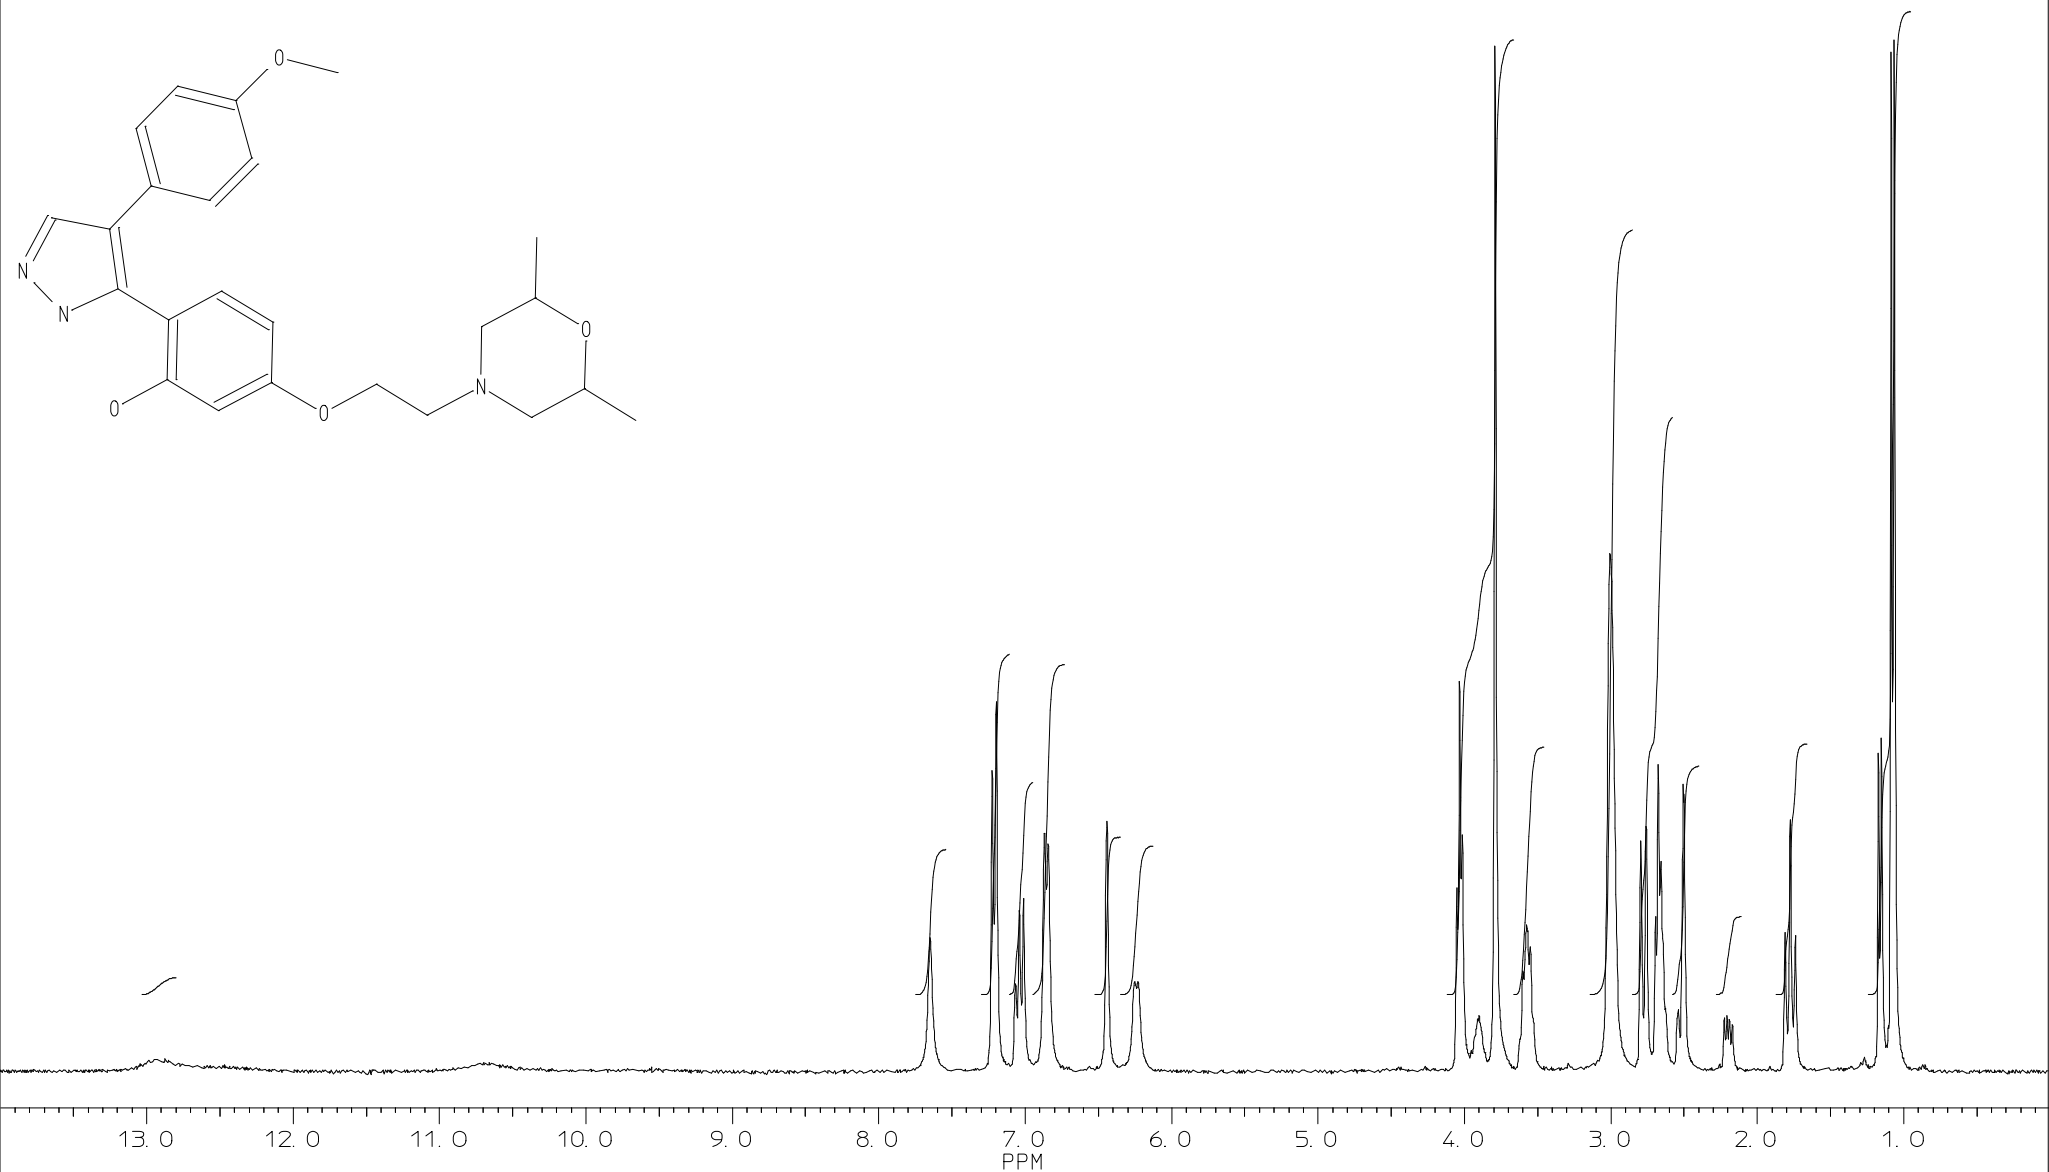

/nmru vt02274 ivx07891

AC-300 SF=300.13 MHz

SI=16K, SW=5376.34, PW=5.0

AQ=1.333, RD=3.00, NS=16

SR=4858.26, TE=318K

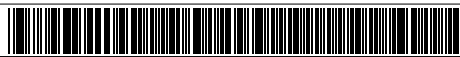

Moscow, 20 June 2014

Opr: STEPANOV A V.;

Solv: DMSO+CCl<sub>4</sub>;

Prep: VT-63;

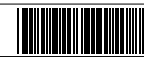

Supplement: data2 [file elife-70700-data2-v2.zip]
