# Supplementary material for: Selective androgen receptor degrader (SARD) to overcome antiandrogen resistance in castration-resistant prostate cancer
Source: eLife journal article supplement (doi:10.7554/elife.70700), 2023-01-19
Supplement: data2 [file elife-70700-data2-v2.zip]

Sample: 15  
File: 8323\_05  
Vial: E/1

Date: 27-Feb-2004  
Time: 12:53:09  
Description: 909561

Page 1.  
AMRI code: ALB-H05180684  
Vial label: M5173041AMP0009

## DAD: 220

max. intensity: 2.8E6

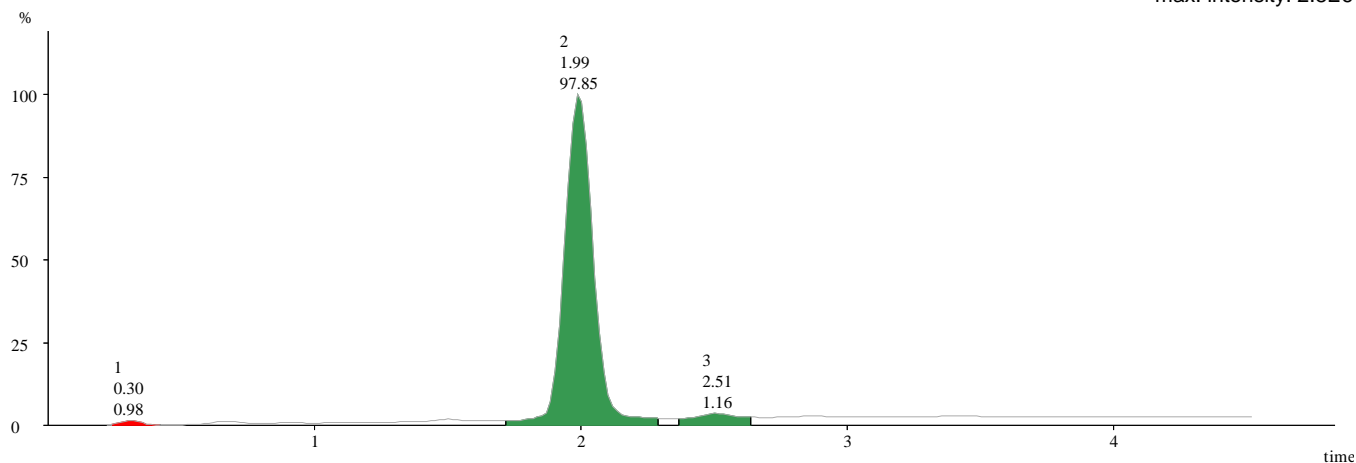

## MS ES+ :473.26+456.26

max. intensity: 9.3E4

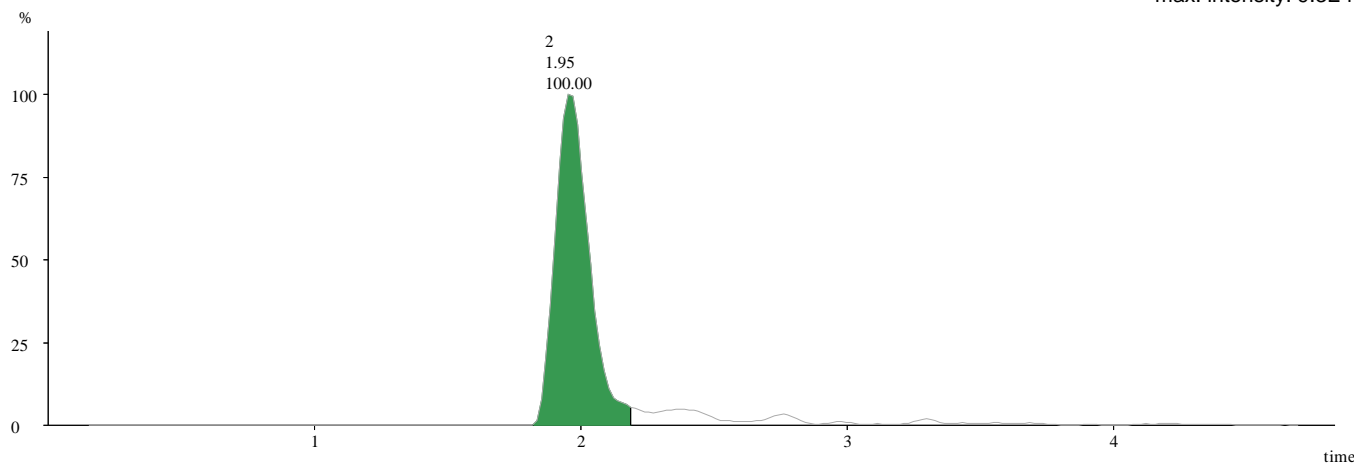

Sample: 15  
File: 8323\_05  
Vial: E/1

Date: 27-Feb-2004  
Time: 12:53:09  
Description: 909561

Page 2.  
AMRI code: ALB-H05180684  
Vial label: M5173041AMP0009

## MS ES+ :TIC

max. intensity: 1.2E5

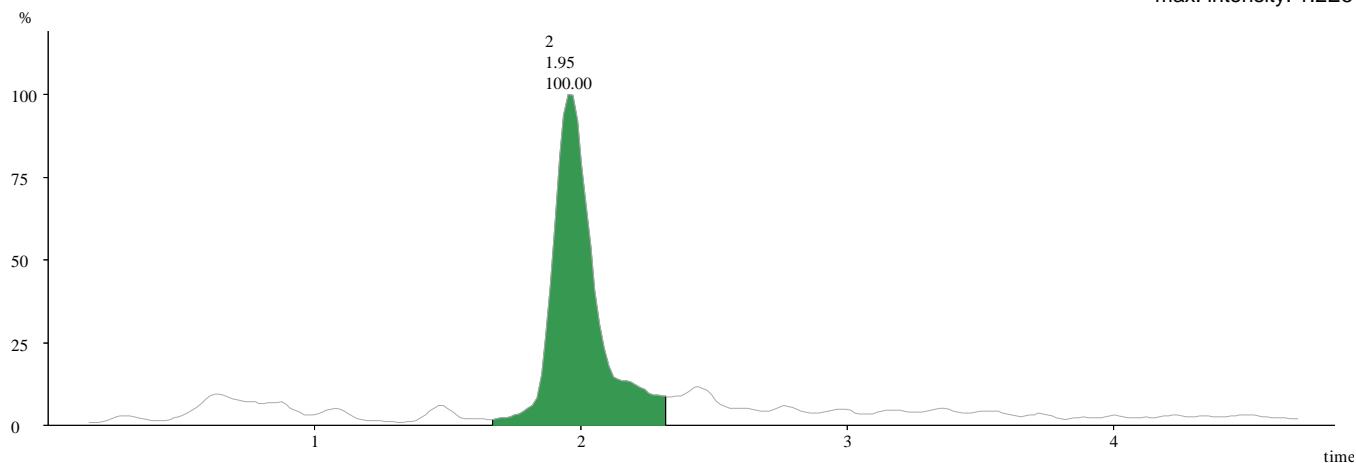

| Peak_ID | Peak      | Area | Area% | Height | Time | Mass Found |
|---------|-----------|------|-------|--------|------|------------|
| 2       | 1.67 2.32 | 2.E4 | 100   | 1.E5   | 1.95 | 455.26     |

## MS: ES+

Combine (116:118-(96:98+141:143))

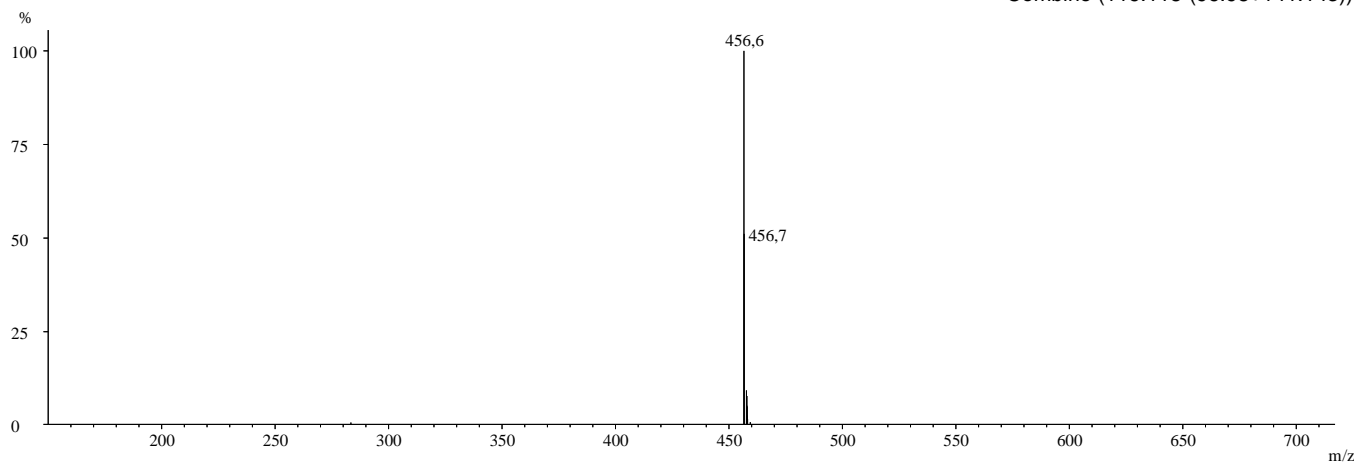

| Peak_ID | Compound | Time | Mass found |
|---------|----------|------|------------|
| 2       | Found    | 1.95 | 455.2600   |

Sample: 15  
File: 8323\_05  
Vial: E/1

Date: 27-Feb-2004  
Time: 12:53:09  
Description: 909561

Page 3.  
AMRI code: ALB-H05180684  
Vial label: M5173041AMP0009

# **MS: ES+**

Combine (149:151-(138:139+160:162))

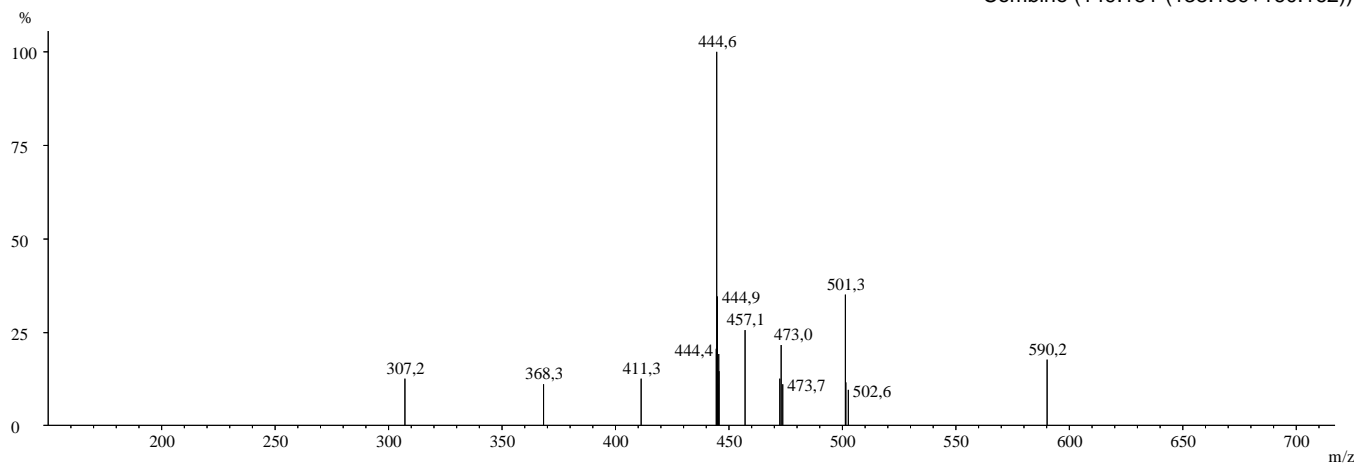

| Peak_ID | Compound  | Time | Mass found |
|---------|-----------|------|------------|
| 3       | Tentative | 2.51 | 455.2600   |
