# Supplementary material for: Selective androgen receptor degrader (SARD) to overcome antiandrogen resistance in castration-resistant prostate cancer
Source: eLife journal article supplement (doi:10.7554/elife.70700), 2023-01-19

MaxPeak: 94.41%  
Ret\_Time: 0.771 min

1892367

OK

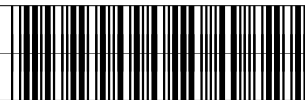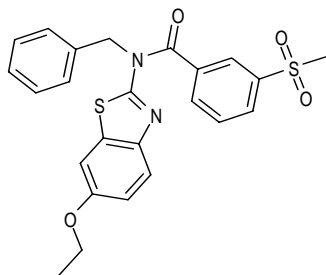

mw = 466.58

| # | Time  | Area% |
|---|-------|-------|
| 1 | 0.771 | 94.41 |
| 2 | 0.801 | 5.59  |

DAD1 A, Sig=215,10 Ref=off (D:\DATA\JUNE\07\_06\V0705\_08\SAMPL031.D)

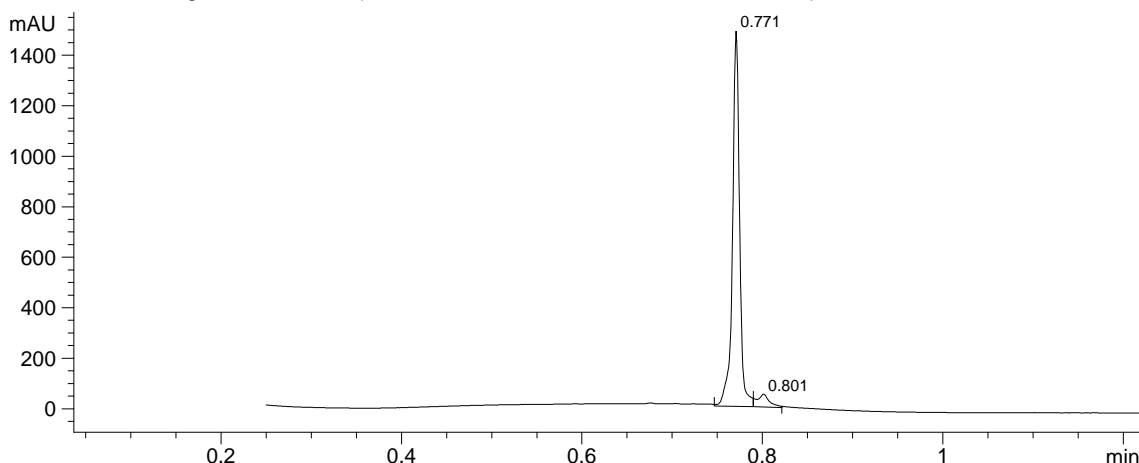

MSD1 TIC, MS File (D:\DATA\JUNE\07\_06\V0705\_08\SAMPL031.D) APCI, Scan, Frag: 120

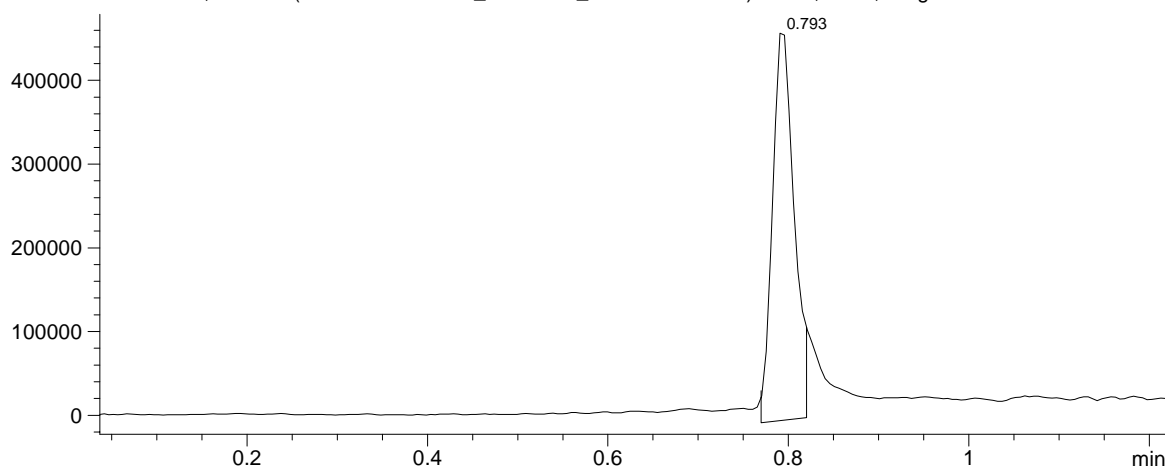

\*MSD1 SPC, time=0.791 of D:\DATA\JUNE\07\_06\V0705\_08\SAMPL031.D APCI, Scan, Frag: 120

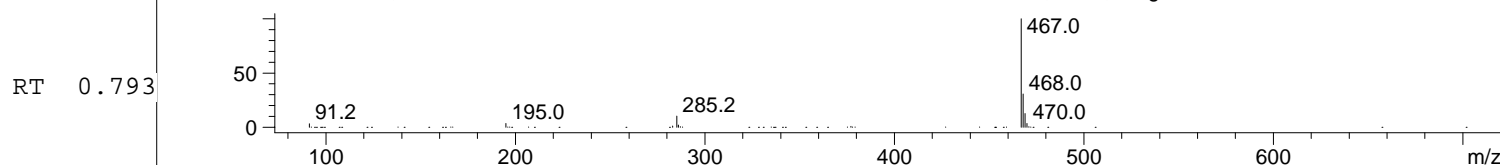

Supplement: data2 [file elife-70700-data2-v2.zip]
