# Supplementary material for: Selective androgen receptor degrader (SARD) to overcome antiandrogen resistance in castration-resistant prostate cancer
Source: eLife journal article supplement (doi:10.7554/elife.70700), 2023-01-19
Supplement: data2 [file elife-70700-data2-v2.zip]

Sample: 16  
File: Ar17704\_68  
Vial: F/1

Date: 10-Oct-2006  
Time: 13:43:29  
Description: 20370720

Page 1.  
AMRI code: ALB-H11202313  
Vial label: 300000194253

## DAD: 220

max. intensity: 1.6E6

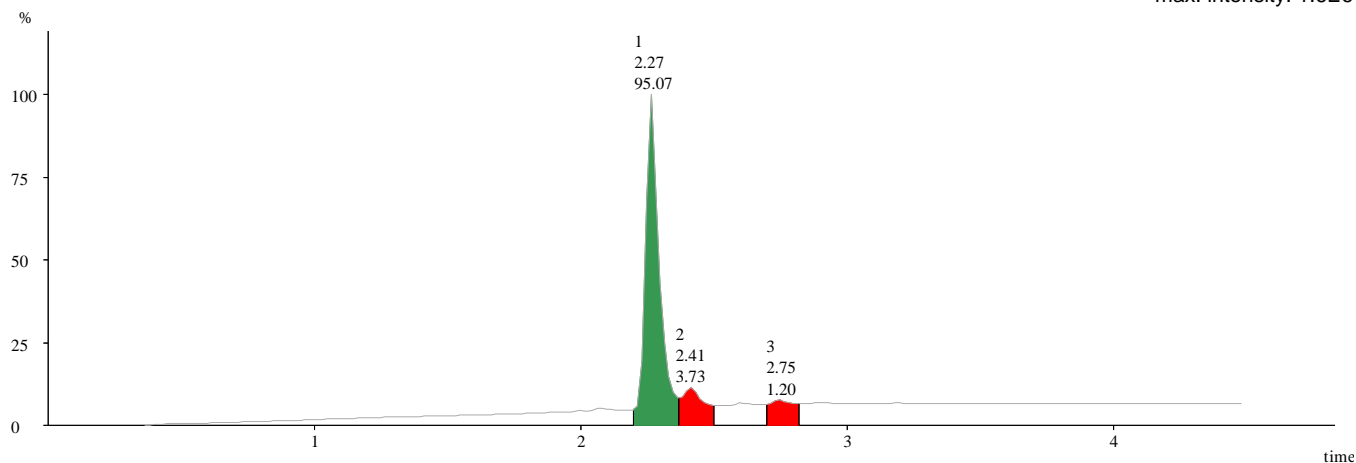

## MS ES+ :543.19+1051.38+526.19

max. intensity: 5.7E4

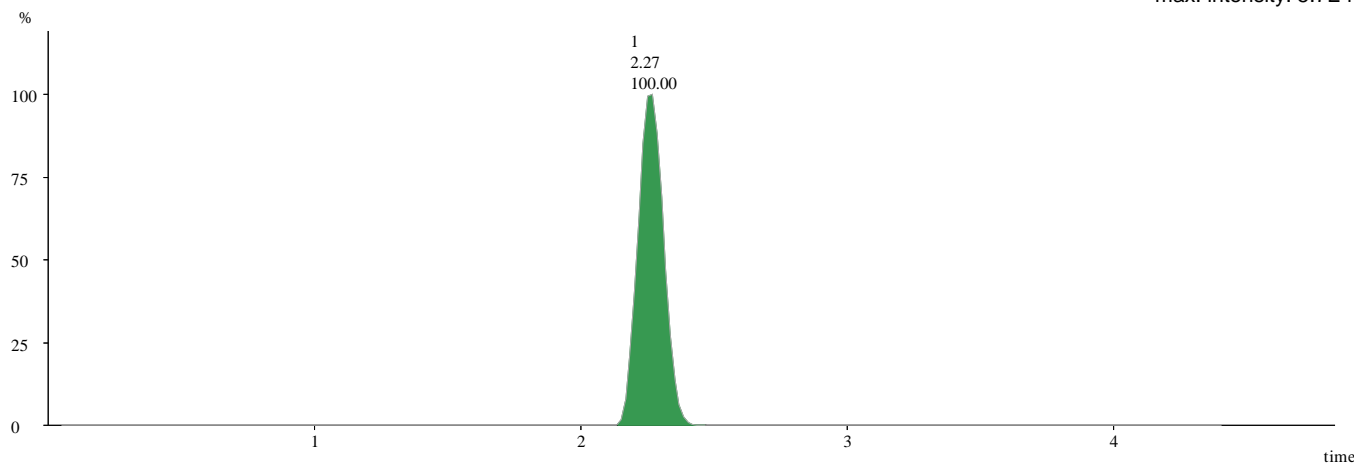

Sample: 16  
File: Ar17704\_68  
Vial: F/1

Date: 10-Oct-2006  
Time: 13:43:29  
Description: 20370720

Page 2.  
AMRI code: ALB-H11202313  
Vial label: 300000194253

## MS ES+ :TIC

max. intensity: 7.5E4

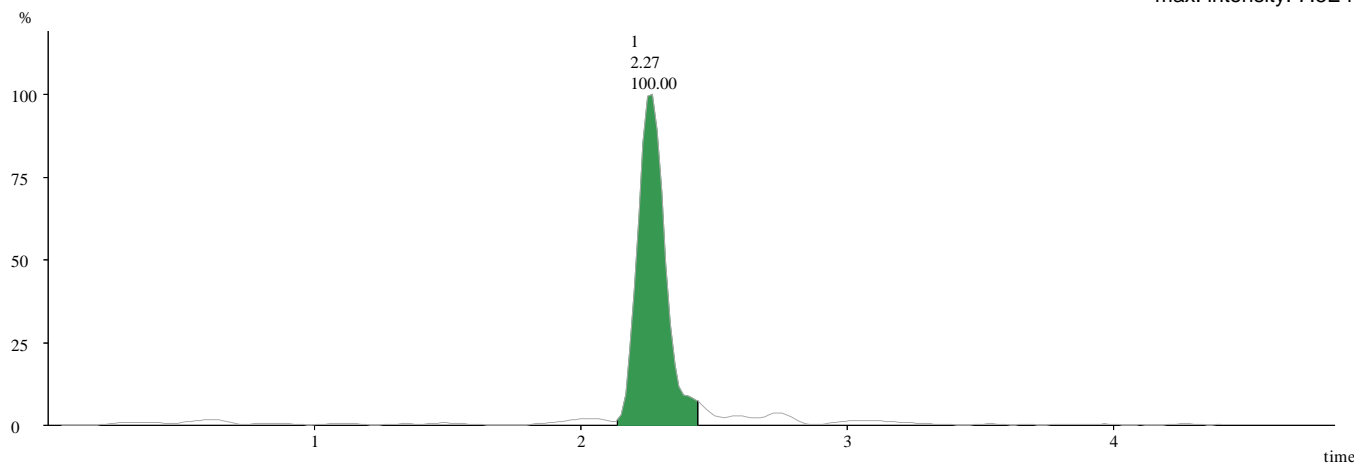

| Peak_ID | Peak      | Area | Area% | Height | Time | Mass Found |
|---------|-----------|------|-------|--------|------|------------|
| 1       | 2.14 2.44 | 8.E3 | 100   | 7.E4   | 2.27 | 525.19     |

## MS: ES+

Combine (134:136-(123:125+147:149))

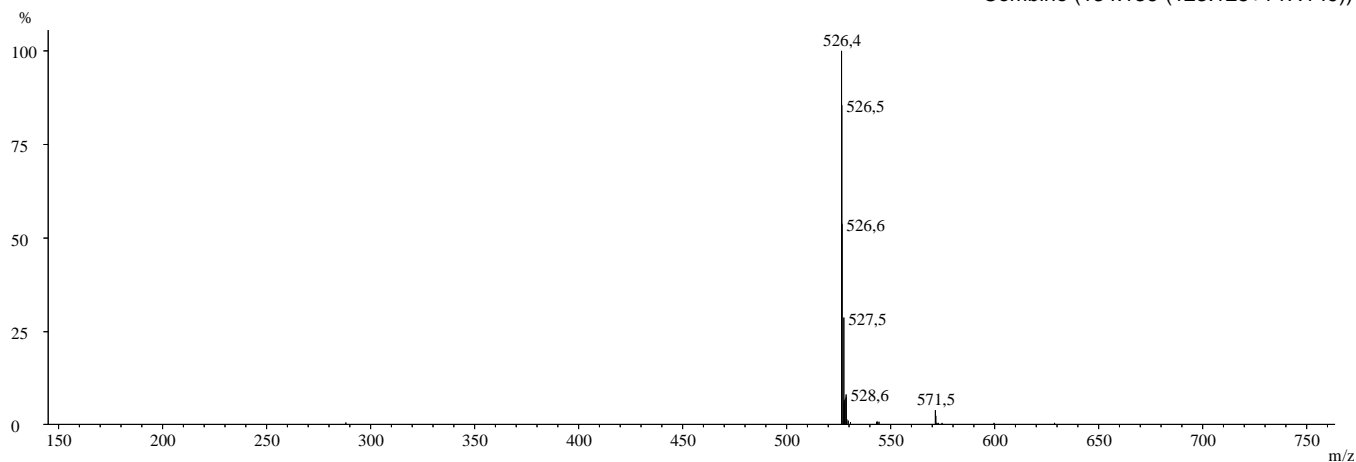

| Peak_ID | Compound | Time | Mass found |
|---------|----------|------|------------|
| 1       | Found    | 2.27 | 525.1900   |

Sample: 16  
File: Ar17704\_68  
Vial: F/1

Date: 10-Oct-2006  
Time: 13:43:29  
Description: 20370720

Page 3.  
AMRI code: ALB-H11202313  
Vial label: 300000194253

## MS: ES+

Combine (143:145-(136:138+151:153))

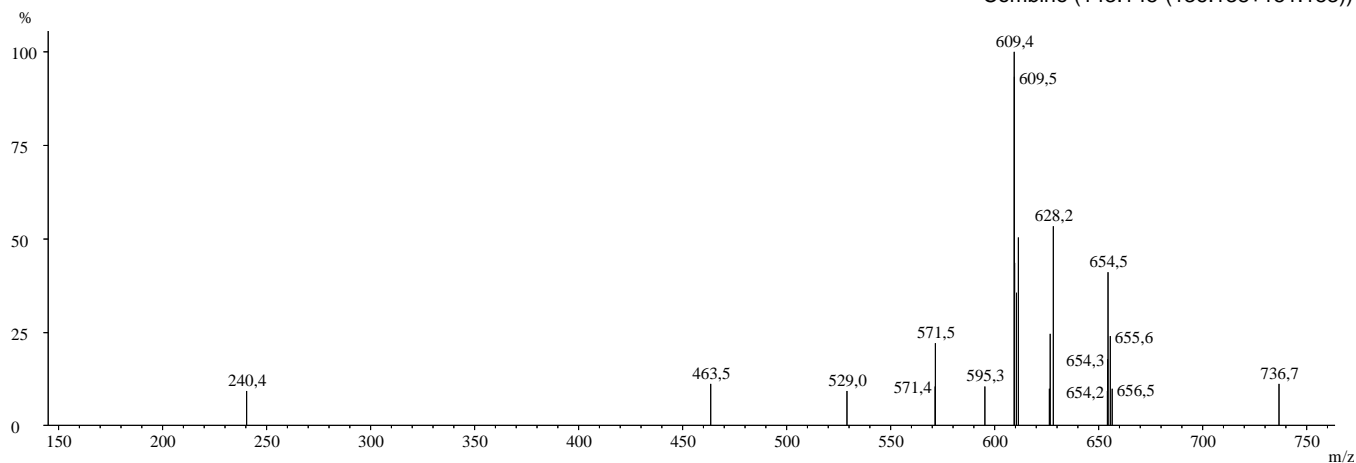

| Peak_ID | Compound | Time | Mass found |
|---------|----------|------|------------|
| 2       |          | 2.41 |            |

## MS: ES+

Combine (163:164-(156:158+170:172))

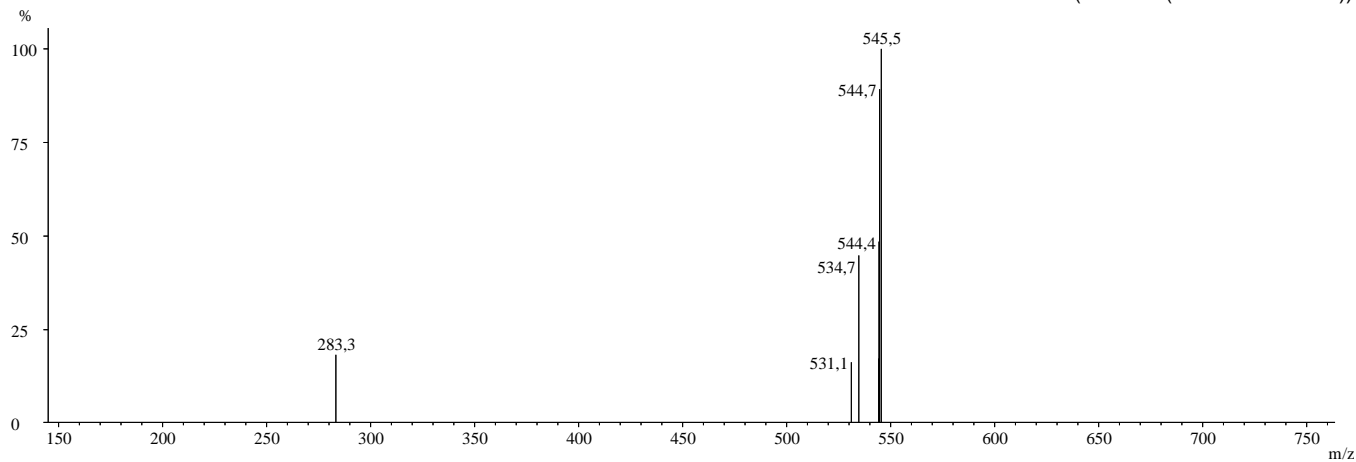

| Peak_ID | Compound | Time | Mass found |
|---------|----------|------|------------|
| 3       |          | 2.75 |            |
