# Supplementary material for: Selective androgen receptor degrader (SARD) to overcome antiandrogen resistance in castration-resistant prostate cancer
Source: eLife journal article supplement (doi:10.7554/elife.70700), 2023-01-19

Sample Name: 550247 OK  
DFN: C:\HPCHEM\1\DATA\OLD\V04\_20\V0420\_09\  
SAMPL028.D

-----  
MaxPeak: 91.45% Ret\_Time: 0.708 min  
-----

The method for the Gradient Sample using  
short rapid resolution HT Cartridge ZORBAX  
SB-C18 4.6x15 mm (p/n 821975-932). For  
testing purity of syntez.

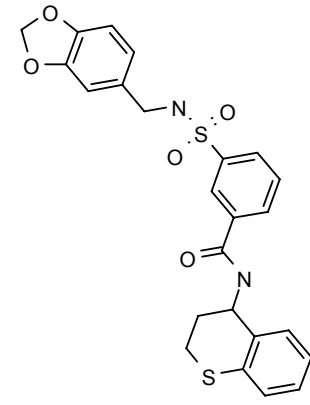

mw = 482,58

| # | Time  | Area% |
|---|-------|-------|
| 1 | 0.469 | 1.14  |
| 2 | 0.535 | 2.62  |
| 3 | 0.708 | 91.45 |
| 4 | 0.763 | 4.79  |

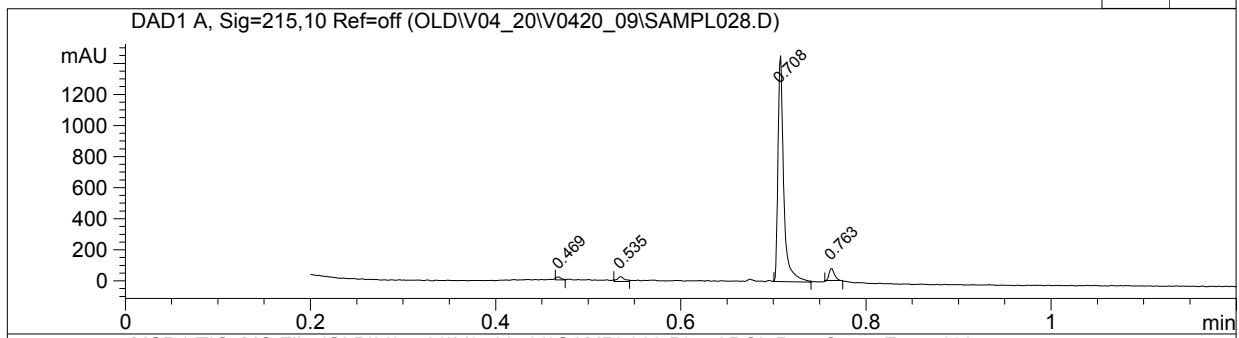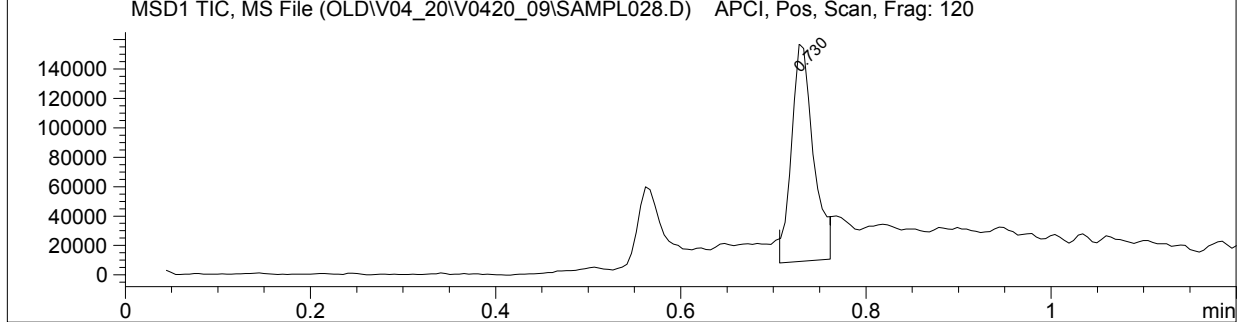

RT 0.730

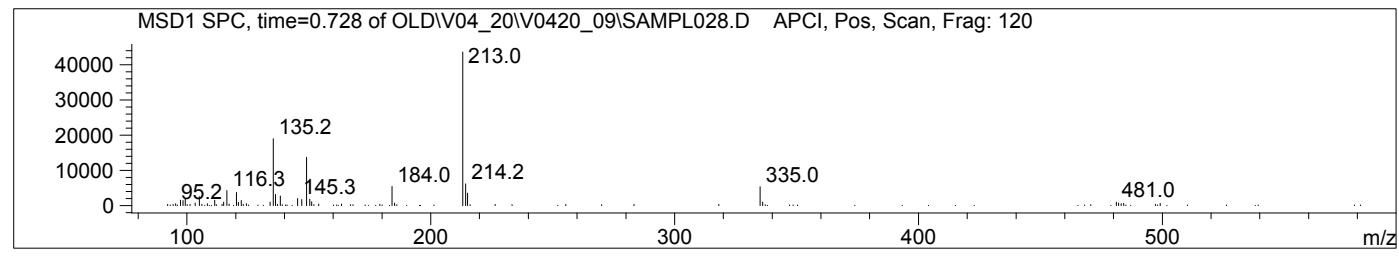

Supplement: data2 [file elife-70700-data2-v2.zip]
