# Supplementary material for: Selective androgen receptor degrader (SARD) to overcome antiandrogen resistance in castration-resistant prostate cancer
Source: eLife journal article supplement (doi:10.7554/elife.70700), 2023-01-19

DFN: D:\DATA~1\APRIL\04\_27\04\_26\_06\SAMPL043.D

MaxPeak: 96.75% Ret\_Time: 0.616 min

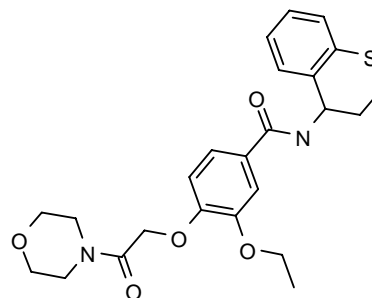

mw = 456,57

The method for the Gradient Sample using short rapid resolution HT Cartridge ZORBAX SB-C18 4.6x15 mm (p/n 821975-932). For testing purity of synteZ.

| # | Time  | Area% |
|---|-------|-------|
| 1 | 0.616 | 96.75 |
| 2 | 0.691 | 3.25  |

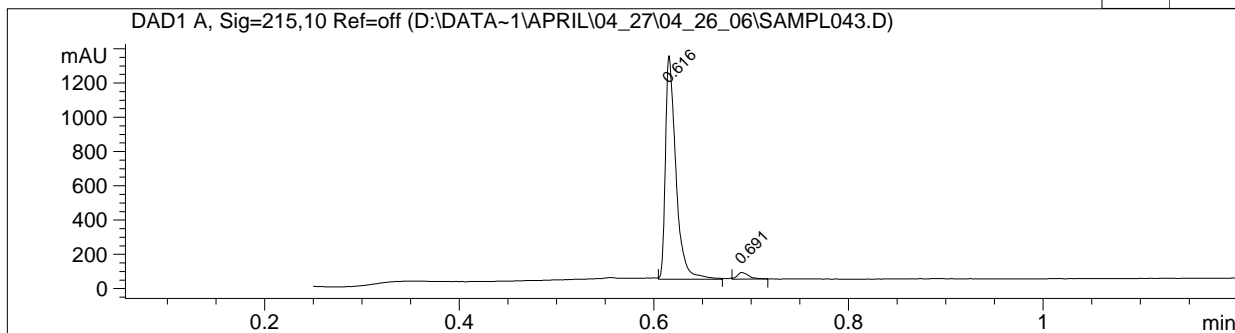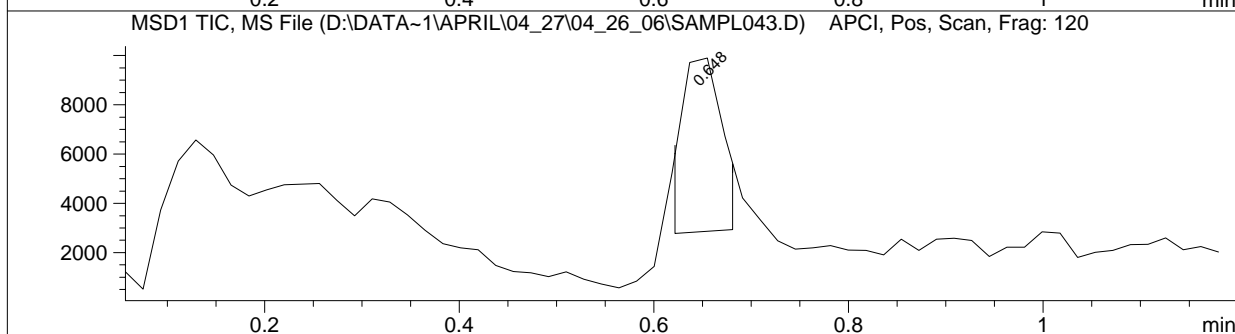

RT 0.648

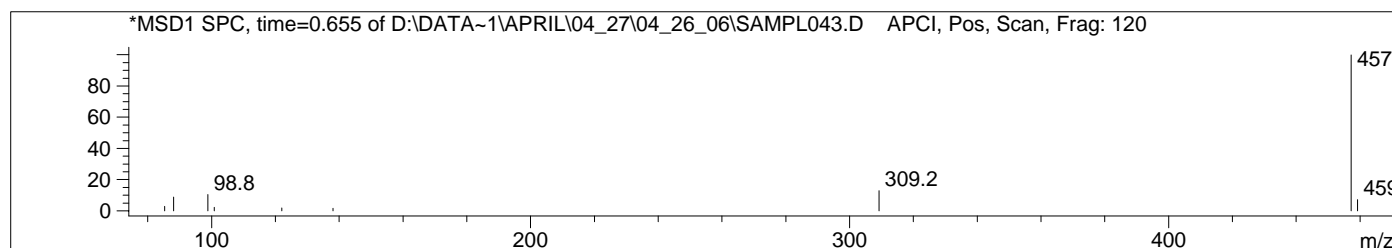

Supplement: data2 [file elife-70700-data2-v2.zip]
