# Supplementary material for: Selective androgen receptor degrader (SARD) to overcome antiandrogen resistance in castration-resistant prostate cancer
Source: eLife journal article supplement (doi:10.7554/elife.70700), 2023-01-19
Supplement: data2 [file elife-70700-data2-v2.zip]

Sample: 144  
File: Ar20781\_44  
Vial: D/6

Date: 19-Jul-2007  
Time: 05:20:51  
Description: 20588572

Page 1.  
AMRI code: ALB-H10738727  
Vial label: 279138-1

## DAD: 220

max. intensity: 2.6E6

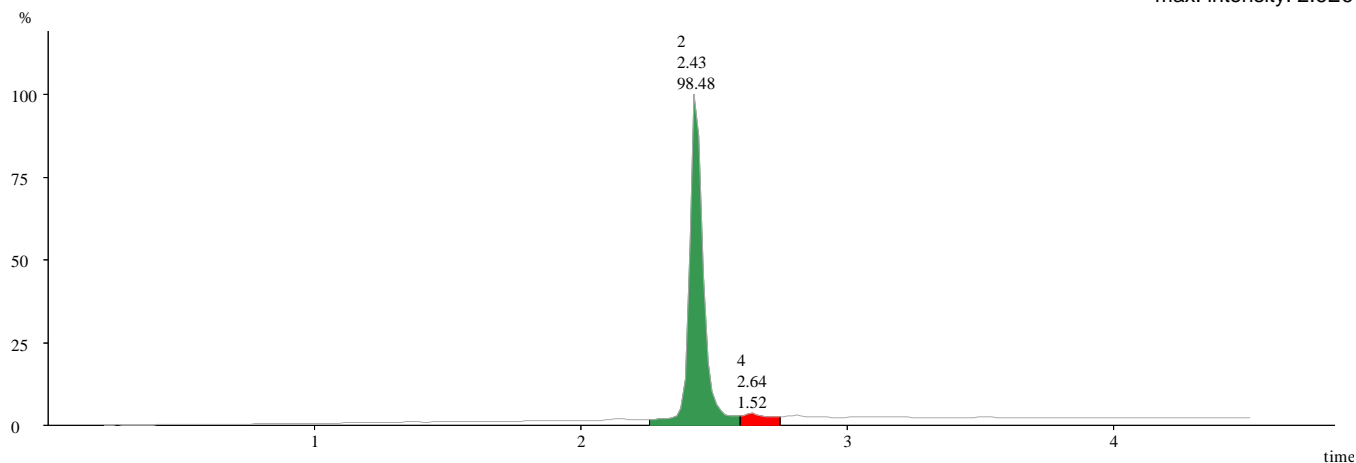

| Peak_ID | Peak      | Area | Area% | Height | Time | Mass Found |
|---------|-----------|------|-------|--------|------|------------|
| 2       | 2.26 2.60 | 1.E5 | 98.48 | 3.E6   | 2.43 | 543.2      |
| 4       | 2.60 2.75 | 2.E3 | 1.52  | 3.E4   | 2.64 |            |

## MS ES+ :561.2+544.2

max. intensity: 1.5E3

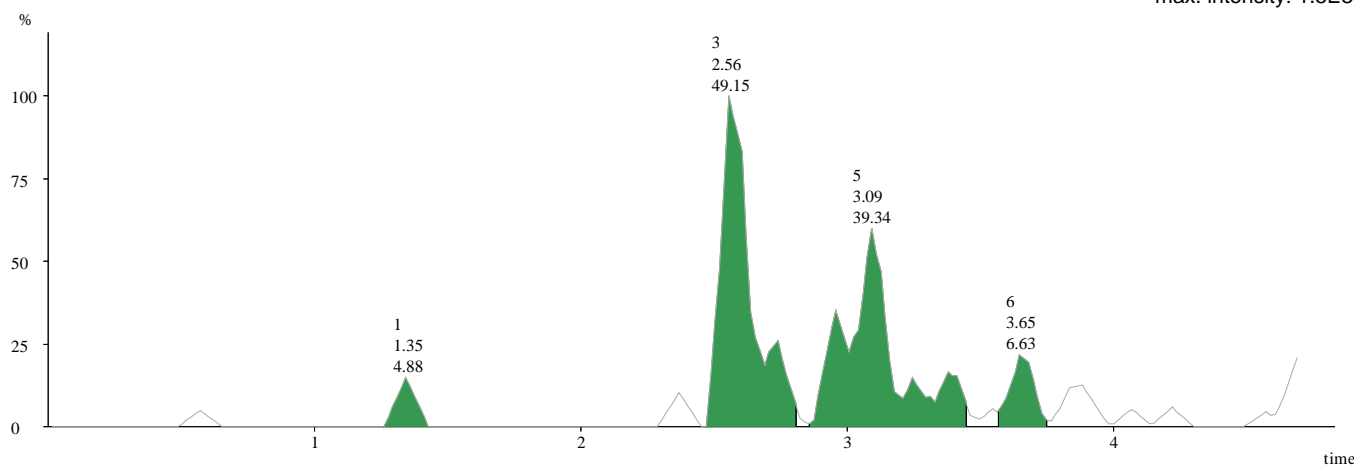

| Peak_ID | Peak      | Area | Area% | Height | Time | Mass Found |
|---------|-----------|------|-------|--------|------|------------|
| 1       | 1.26 1.43 | 2.E1 | 4.88  | 2.E2   | 1.35 | 543.2      |
| 3       | 2.47 2.81 | 2.E2 | 49.15 | 1.E3   | 2.56 | 543.2      |
| 5       | 2.86 3.45 | 1.E2 | 39.34 | 8.E2   | 3.09 | 543.2      |
| 6       | 3.57 3.75 | 3.E1 | 6.63  | 3.E2   | 3.65 | 543.2      |

Sample: 144  
File: Ar20781\_44  
Vial: D/6

Date: 19-Jul-2007  
Time: 05:20:51  
Description: 20588572

Page 2.  
AMRI code: ALB-H10738727  
Vial label: 279138-1

## MS ES+ :TIC

max. intensity: 8.6E4

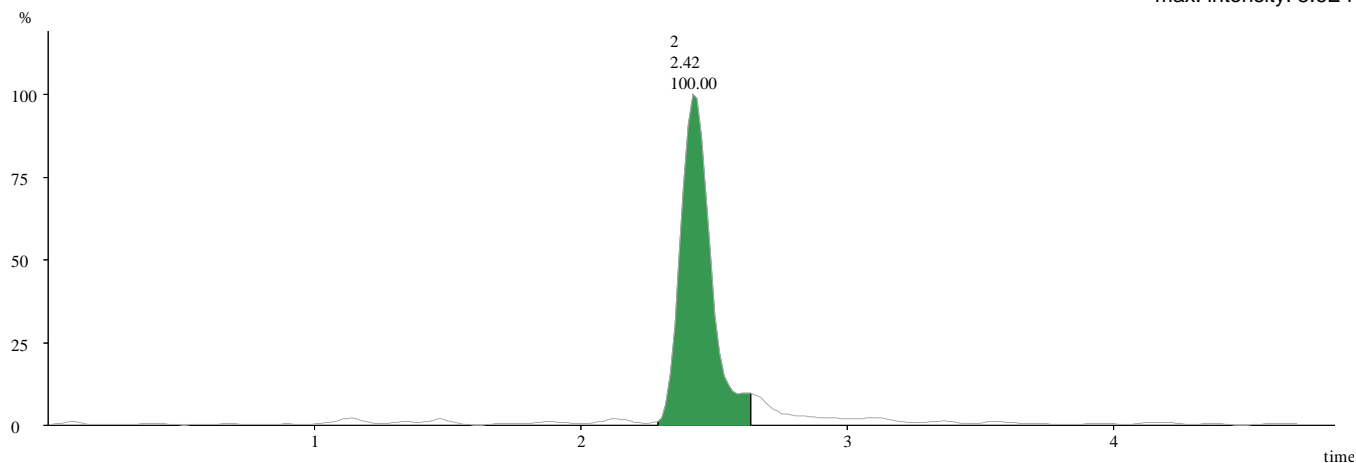

| Peak_ID | Peak      | Area | Area% | Height | Time | Mass Found |
|---------|-----------|------|-------|--------|------|------------|
| 2       | 2.29 2.64 | 1.E4 | 100   | 8.E4   | 2.42 | 543.2      |

## MS: ES+

Combine (143:145-(132:134+159:161))

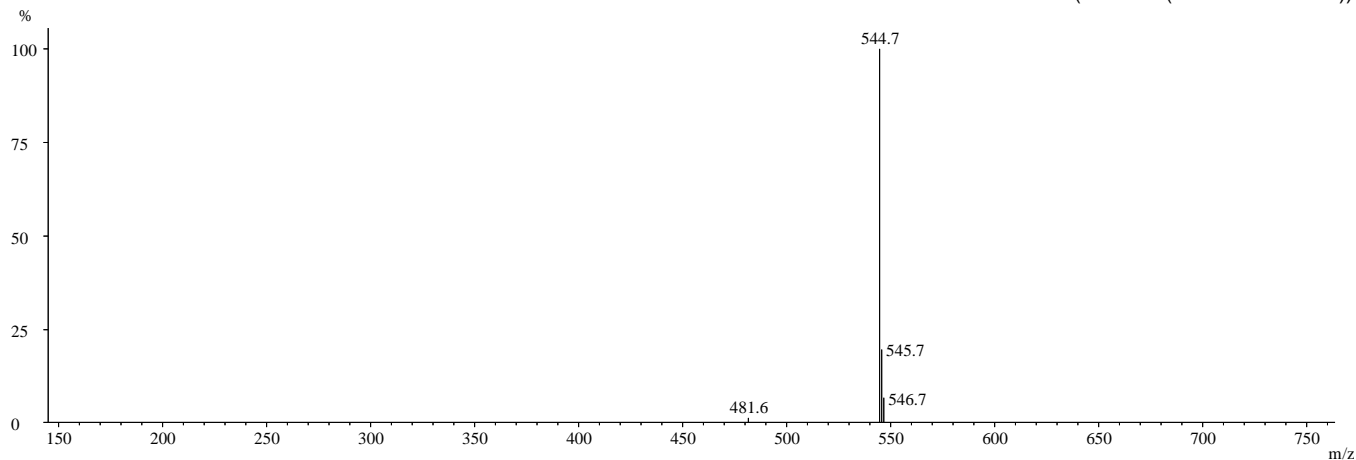

| Peak_ID | Compound | Time | Mass found |
|---------|----------|------|------------|
| 2       | Found    | 2.42 | 543.2000   |

Sample: 144  
File: Ar20781\_44  
Vial: D/6

Date: 19-Jul-2007  
Time: 05:20:51  
Description: 20588572

Page 3.  
AMRI code: ALB-H10738727  
Vial label: 279138-1

# **MS: ES+**

Combine (156:158-(150:152+166:167))

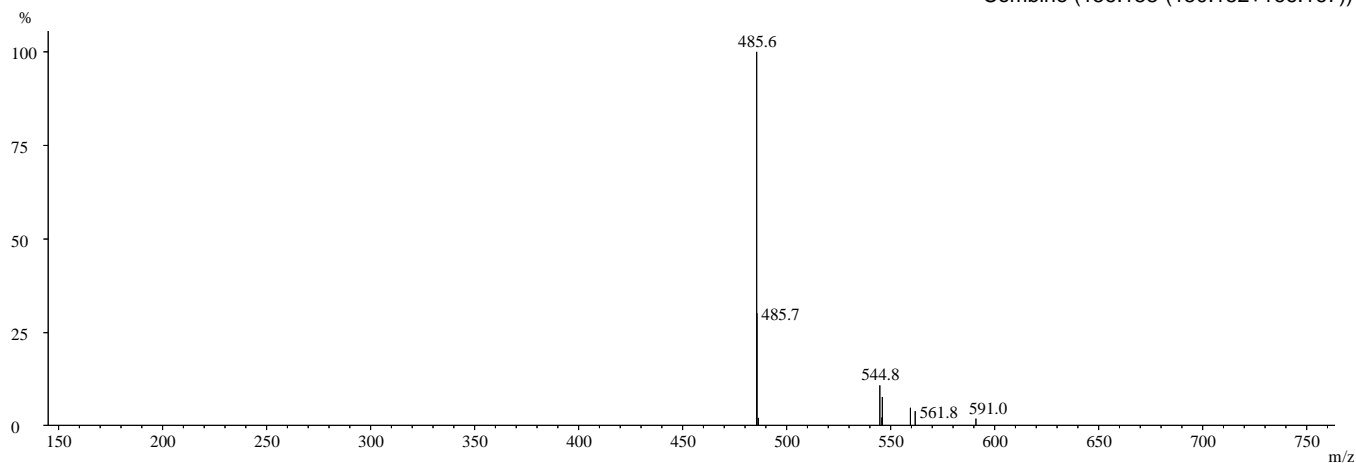

| Peak_ID | Compound | Time | Mass found |
|---------|----------|------|------------|
| 4       |          | 2.64 |            |
