# Supplementary material for: Selective androgen receptor degrader (SARD) to overcome antiandrogen resistance in castration-resistant prostate cancer
Source: eLife journal article supplement (doi:10.7554/elife.70700), 2023-01-19

DFN: E:\DATATY~1\NEW\10\10\_11\10\_11\_02\  
SAMPL078.D-----  
MaxPeak: 100.00% Ret\_Time: 0.676 min  
-----

Could not execute user defined Macro -&gt;

The method for the Gradient Sample using  
short rapid resolution HT Cartridge ZORBAX  
SB-C18 4.6x15 mm (p/n 821975-932). For  
testing purity of synteZ.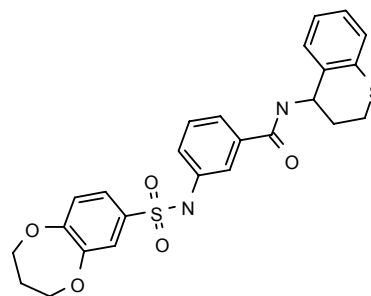

mw = 496,61

-----  
# Time Area%  
-----  
1 0.676 100.00  
-----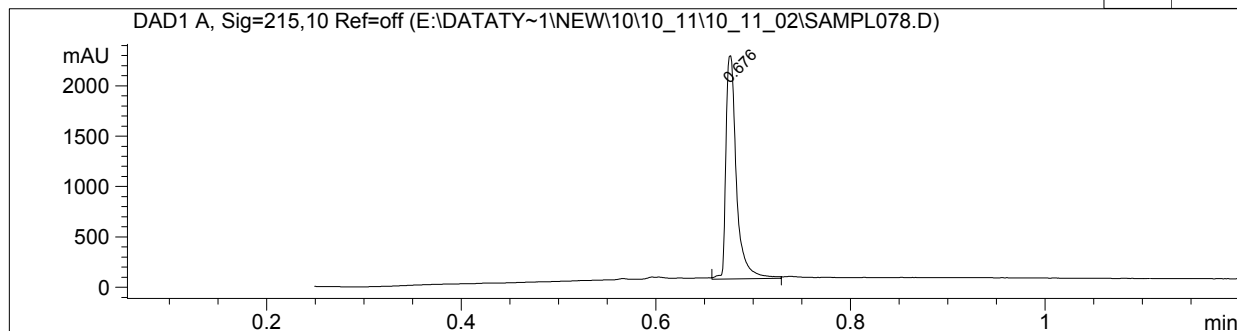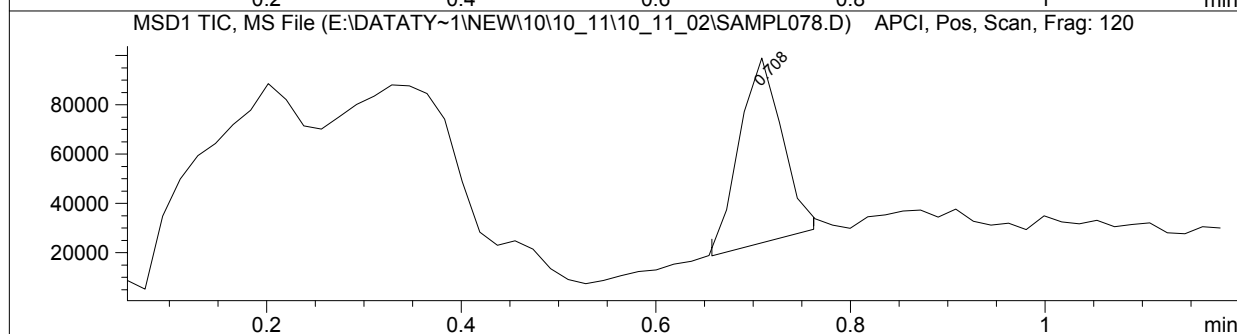

RT 0.708

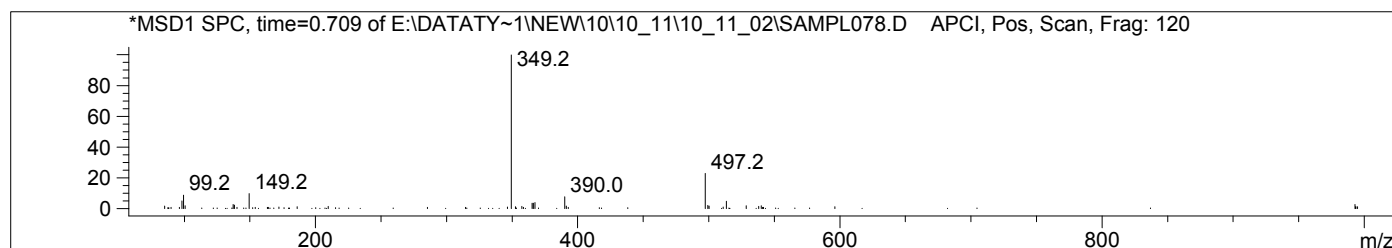

Supplement: data2 [file elife-70700-data2-v2.zip]
