# Supplementary material for: Selective androgen receptor degrader (SARD) to overcome antiandrogen resistance in castration-resistant prostate cancer
Source: eLife journal article supplement (doi:10.7554/elife.70700), 2023-01-19

Raw data file name: D:\MYWORK~1\VRABOT~1\11\_12\_08\SAMPL014.D  
The method for the Gradient Sample using short rapid resolution HT Cartridge ZORBAX SB-C18 4.6x15 mm (p/n 821975-932). For testing purity of syntez.

| # | Time  | Area % |
|---|-------|--------|
| 1 | 0.722 | 94.62  |
| 2 | 0.768 | 5.38   |

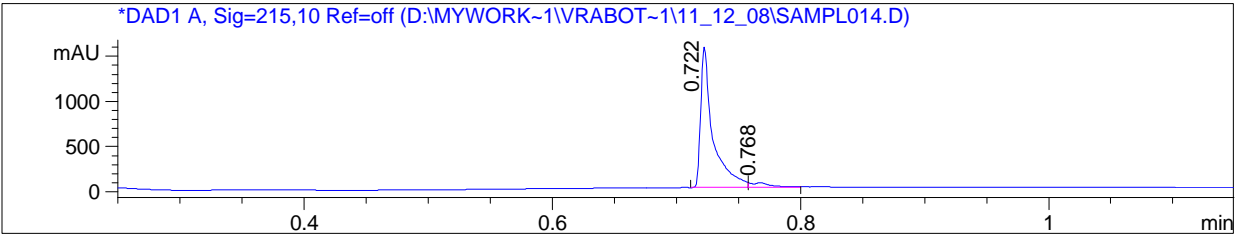

| # | Time  | Area % |
|---|-------|--------|
| 1 | 0.764 | 100.00 |

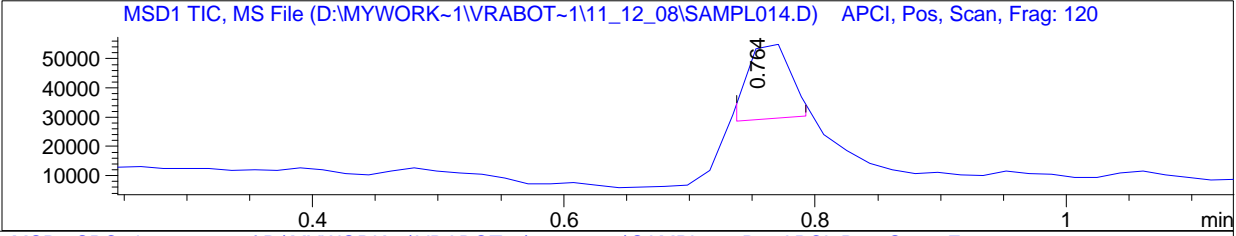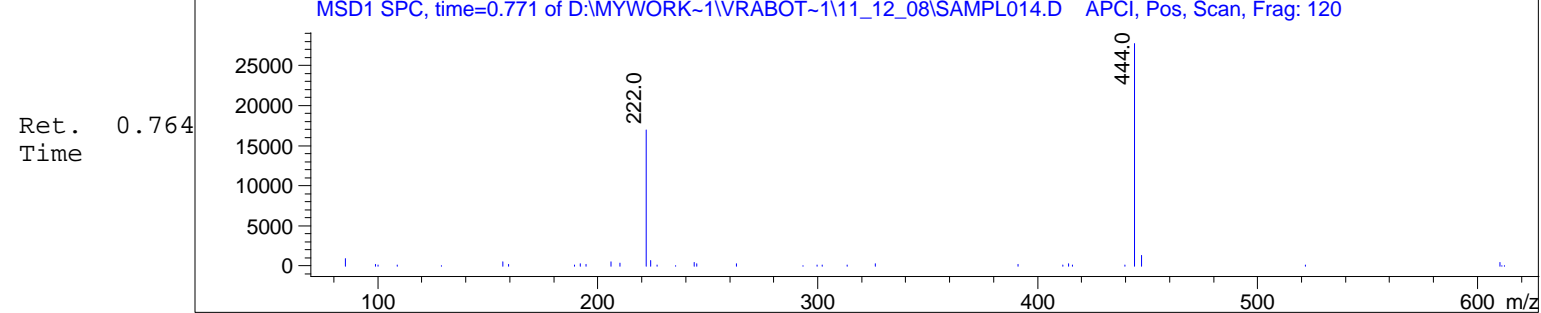

Supplement: data2 [file elife-70700-data2-v2.zip]
