# Supplementary material for: Selective androgen receptor degrader (SARD) to overcome antiandrogen resistance in castration-resistant prostate cancer
Source: eLife journal article supplement (doi:10.7554/elife.70700), 2023-01-19

MaxPeak: 96.59%  
Ret\_Time: 1.269 min

5466878

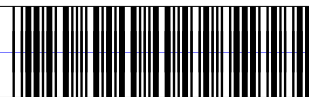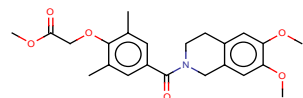

Mol Wt 413.46  
Exact Mass 413.21

| # | Time  | Area% |
|---|-------|-------|
| 1 | 1.058 | 2.53  |
| 2 | 1.195 | 0.88  |
| 3 | 1.269 | 96.59 |

DAD1 A, Sig=215,16 Ref=off (D:\DATE\06\_07\06\_06\_19\SAMPL005.D)

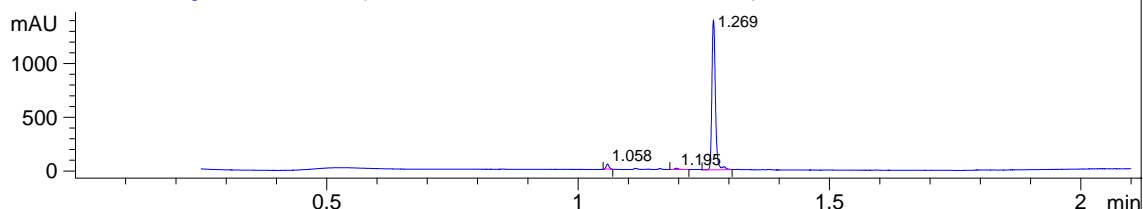

DAD1 B, Sig=254,16 Ref=off (D:\DATE\06\_07\06\_06\_19\SAMPL005.D)

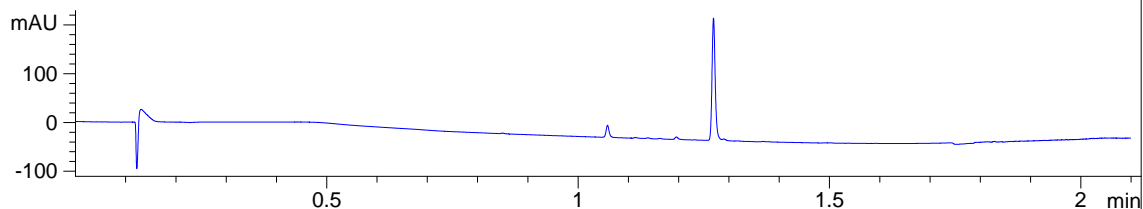

MSD1 TIC, MS File (D:\DATE\06\_07\06\_06\_19\SAMPL005.D) ES-API, Scan, Frag: 100, "POS"

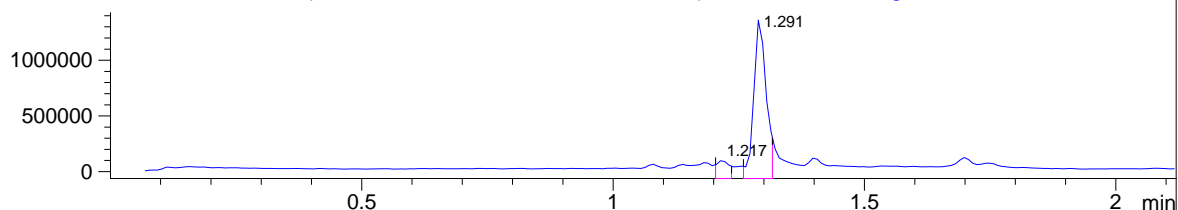

MSD2 TIC, MS File (D:\DATE\06\_07\06\_06\_19\SAMPL005.D) ES-API, Scan, Frag: 100, "NEG"

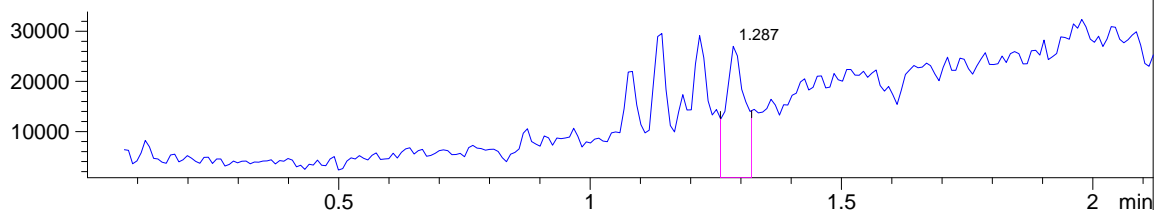

ADC1 A, ELSD (D:\DATE\06\_07\06\_06\_19\SAMPL005.D)

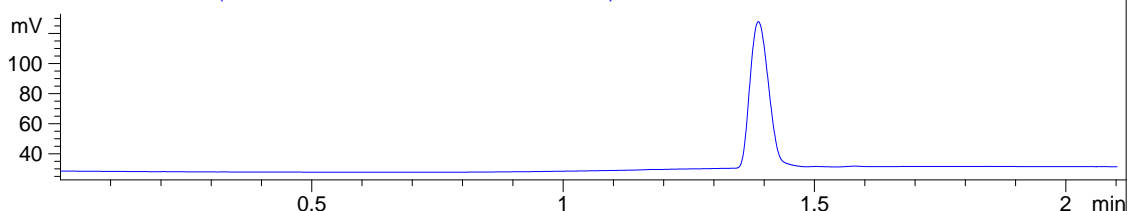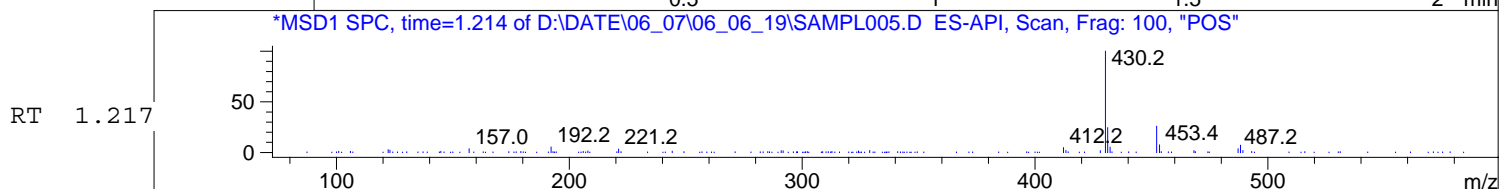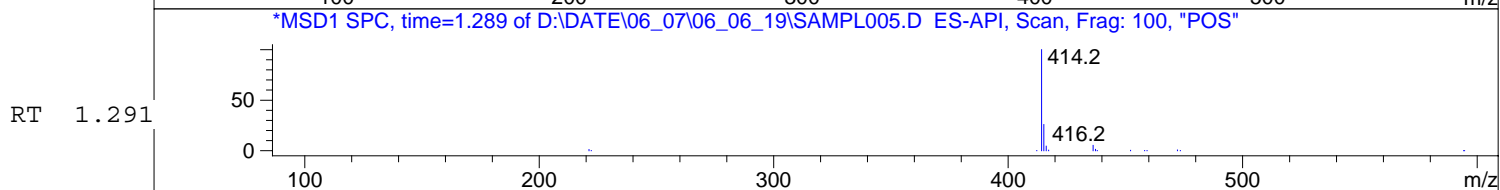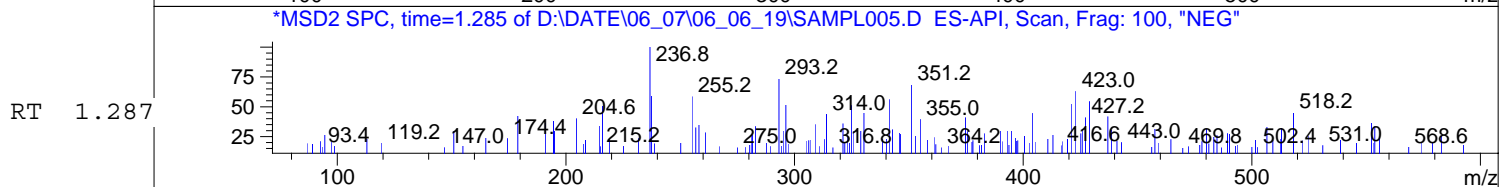

Supplement: data2 [file elife-70700-data2-v2.zip]
