# Supplementary material for: Selective androgen receptor degrader (SARD) to overcome antiandrogen resistance in castration-resistant prostate cancer
Source: eLife journal article supplement (doi:10.7554/elife.70700), 2023-01-19
Supplement: data2 [file Figure 1-figure supplement 2A.xls]

## Sheet: Figure 1-figure supplement 2A
Cell lines	PC-3
Plasmids	PSA 100 ng	wt-AR 20 ng	Renilla 3 ng
Firefly (PSA-luc)
140373	23030	7219	106990		143771	3929		62244	190172	23473	42150	89407		136451	92653		322193	168039	34377	452893		326662	183624			145964	52404	82241	45964		346653	165460	93586		108011	29082	34143	60036
171756	52897	4941	142972		105739	3656		65243	143708	16186	36489	24569		45742	109956		283526	144101	72509	237713		213607	219440			80568	48216	85266	80568		314016	165221	78376		100249	31243	20998	48281
110990	64009	48377	125463		77088	5603		23181	165481	15045	79397	39387		231988	163306		287695	250032	63475	182477		191838	147178			62947	50733	49251	62947		192780	87792	139850		106065	34352	65600	33529
Renilla
22846030	7517674	6090106	22670444		33599940	5124967		44068976	33194898	37823000	15345985	38315588		28260170	32991764		16270919	18858142	3449525	28508734		17342254	34104412			3280759	4207819	6758818	3280759		16252457	12746861	15001449		8531052	6292111	7840815	10013724
20179514	12435879	5310232	30477844		20665950	6311915		33795320	28082410	28153230	8695035	15359899		18147330	32949260		18934476	16259024	9217349	30585282		19562072	37918060			2734697	3780975	3767802	4734697		16460222	16964602	10629198		10456380	5893272	6734446	9586203
21512772	14722562	16801612	29736310		24945094	11938497		18696146	23407856	24861922	15839326	9312913		20601292	33998416		15027031	14153688	8688984	25149664		19144976	30902752			3200837	3483114	3575060	5200837		14899049	14880598	21455478		14298344	10524863	18685436	8785438
Firefly/Renilla
0.00614431	0.00306345	0.00118537	0.00471936		0.00427891	0.000766639		0.00141242	0.00572895	0.000620601	0.00274665	0.00233344		0.00482839	0.00280837		0.0198018	0.00891069	0.00996572	0.0158861		0.0188362	0.00538417			0.012454	0.0444909	0.012168	0.0140102		0.0213293	0.0129805	0.00623846		0.0126609	0.00462198	0.00435452	0.00599537
0.0085114	0.00425358	0.000930468	0.00469101		0.00511658	0.000579222		0.00193053	0.00511737	0.000574925	0.00419653	0.00159955		0.00252059	0.00333713		0.0149741	0.00886283	0.00786658	0.00777214		0.0109194	0.00578722			0.0127523	0.0294614	0.0226302	0.0170165		0.0190773	0.00973916	0.00737365		0.00958735	0.00530147	0.003118	0.00503651
0.00515926	0.00434768	0.00287931	0.00421919		0.00309031	0.000469322		0.00123988	0.00706946	0.000605142	0.00501265	0.00422929		0.0112608	0.00480334		0.0191452	0.0176655	0.00730523	0.00725564		0.0100203	0.00476262			0.0145654	0.0196658	0.0137763	0.0121032		0.0129391	0.00589976	0.00651815		0.00741799	0.00326389	0.00351076	0.00381643
DHT 5 nM	Z3 10 μM	Z5 10 μM	Z8 10 μM		DHT 5 nM	Z15 10 μM		DMSO	DHT 5 nM	ENZa 5 μM	Z27 10 μM	Z34 10 μM		DHT 5 nM	Z37 10 μM		DHT 5 nM	Z39 10 μM	Z41 10 μM	Z43 10 μM		DHT 5 nM	Z54 10 μM			DHT 5 nM	Z60 10 μM	Z63 10 μM	Z65 10 μM		DHT 5 nM	Z66 10 μM	Z70 10 μM		DHT 5 nM	Z71 10 μM	Z7510 μM	Z76 10 μM
% of DHT group
93.0251	46.3807	17.9465	71.4513		102.809	18.42		23.6507	95.9302	10.3918	45.9921	39.073		77.8772	45.2963		110.193	49.5865	55.4575	88.4035		142.053	40.6046			142.599	39.9165	38.9999	44.9044		119.962	73.0059	35.087		128.03	46.7386	44.034	60.6267
128.863	64.3994	14.0873	71.0222		122.936	13.9169		32.3264	85.6893	9.62701	70.2701	26.7842		40.6547	53.8247		83.3281	49.3202	43.7762	43.2506		82.3488	43.6442			94.4276	40.8726	72.5326	54.5401		107.296	54.7759	41.4716		96.9497	53.6098	31.53	50.9304
78.1114	65.8241	43.5928	63.8787		74.2505	11.2764		20.7616	118.377	10.133	83.9359	70.8186		181.627	77.4732		106.54	98.3055	40.6523	40.3764		75.5677	35.9172			63.0314	46.684	44.1547	38.7924		72.7732	33.182	36.66		75.0126	33.0053	35.5016	38.5927
DHT 5 nM	Z3 10 μM	Z5 10 μM	Z8 10 μM		DHT 5 nM	Z15 10 μM		DMSO	DHT 5 nM	ENZa 5 μM	Z27 10 μM	Z34 10 μM		DHT 5 nM	Z37 10 μM		DHT 5 nM	Z39 10 μM	Z41 10 μM	Z43 10 μM		DHT 5 nM	Z54 10 μM			DHT 5 nM	Z60 10 μM	Z63 10 μM	Z65 10 μM		DHT 5 nM	Z66 10 μM	Z70 10 μM		DHT 5 nM	Z71 10 μM	Z7510 μM	Z76 10 μM
