# Supplementary material for: Selective androgen receptor degrader (SARD) to overcome antiandrogen resistance in castration-resistant prostate cancer
Source: eLife journal article supplement (doi:10.7554/elife.70700), 2023-01-19
Supplement: data2 [file Figure 1-figure supplement 2B.xls]

## Sheet: Figure 1-figure supplement 2B
Cell lines	PC-3
Plasmids	PSA 100 ng	wt-AR 20 ng	Renilla 3 ng
Firefly (PSA-luc)
18578	254618	39111	34001
71287	236519	28683	15413
39709	206271	30460	19740
Renilla
20153146	18641582	20654600	12908009
20041492	19806264	21673970	14826853
16074225	21062508	25889778	13814360
Firefly/Renilla
0.000921841	0.0136586	0.00189357	0.0026341
0.00355697	0.0119416	0.00132338	0.00103953
0.00247035	0.00979328	0.00117653	0.00142895
DMSO	DHT 5 nM	ENZa 5 μM	Z15 10 μM
% of DHT group
7.81221	115.751	16.0472	22.3229
30.1438	101.2	11.2151	8.8096
20.9352	82.9939	9.97056	12.1097
DMSO	DHT 5 nM	ENZa 5 μM	Z15 10 μM
