# Supplementary material for: Selective androgen receptor degrader (SARD) to overcome antiandrogen resistance in castration-resistant prostate cancer
Source: eLife journal article supplement (doi:10.7554/elife.70700), 2023-01-19
Supplement: data2 [file Figure 1-figure supplement 2C.xls]

## Sheet: Figure 1-figure supplement 2C
Cell lines	PC-3
Plasmids	MMTV 100 ng	Renilla 3 ng
Firefly (MMTV-luc)
19756	1214510	51911	582305
9623	1980222	38128	1548563
8402	1401459	59229	1411822
Renilla
24401622	46244112	22671348	32393558
18768914	44168236	20570028	40752132
17804318	35759952	30406926	55500108
Firefly/Renilla
0.000809618	0.026263	0.00228972	0.017976
0.000512709	0.0448336	0.00185357	0.0379996
0.000471908	0.0391907	0.00194788	0.0254382
DMSO	Dex 100 nM	Mif 1 μM	Z15 10 μM
% of DHT group
2.20244	71.4446	6.22883	48.9008
1.39475	121.963	5.04236	103.372
1.28375	106.612	5.29891	69.2007
DMSO	Dex 100 nM	Mif 1 μM	Z15 10 μM
