# Supplementary material for: Selective androgen receptor degrader (SARD) to overcome antiandrogen resistance in castration-resistant prostate cancer
Source: eLife journal article supplement (doi:10.7554/elife.70700), 2023-01-19
Supplement: data2 [file Figure 1-figure supplement 3A-D.xls]

## Sheet: Figure 1-figure supplement 3A
Cell lines	PC-3
Plasmids	PSA 100 ng	wt-AR 20 ng	Renilla 3 ng
Firefly (PSA-luc)
	462154	45379	60417	62755	161743	251523	387878	456906
	416927	41343	37129	34871	124350	235845	488728	470627
	434198	52709	46416	50731	117458	394257	465633	482639
Renilla
	1903098	1650639	1551118	1750763	2178564	2384090	1820245	2130746
	1663837	1714006	1301797	1528245	1879959	2034437	2432576	2071419
	1926194	1960410	1418859	1686032	1882677	1856215	2220592	1995607
Firefly/Renilla
	0.242843	0.0274918	0.0389506	0.0358444	0.0742429	0.105501	0.213091	0.214435
	0.250582	0.0241207	0.0285213	0.0228177	0.0661451	0.115926	0.20091	0.2272
	0.225418	0.0268867	0.0327136	0.030089	0.0623888	0.212398	0.209689	0.241851
	DHT 5 nM	ENZa 5 μM	Z15 20 μM	Z15 5 μM	Z15 1.25 μM	Z15 0.31 μM	Z15 0.078 μM	Z15 0.019 μM
% of DHT group
	101.353	11.474	16.2565	14.9601	30.9862	44.032	88.9362	89.497
	104.583	10.0671	11.9037	9.52324	27.6065	48.3833	83.8521	94.8248
	94.0808	11.2215	13.6534	12.558	26.0387	88.6471	87.5161	100.939
	DHT 5 nM	ENZa 5 μM	Z15 20 μM	Z15 5 μM	Z15 1.25 μM	Z15 0.31 μM	Z15 0.078 μM	Z15 0.019 μM

## Sheet: Figure 1-figure supplement 3B
Cell lines	PC-3
Plasmids		MMTV 100 ng + Renilla 3 ng
Firefly (MMTV-luc)
	1252909	81359	385958	905002	1205835	1424498	1551828	1317777
	1900294	91001	526864	1087104	1017839	1437517	2317526	1731629
	1530808	102375	389443	1266855	922429	1879943	1957432	1940032
Renilla
	2999147	2013763	1306013	2795499	2837336	2978257	2816793	3386255
	2576584	2365858	1148782	2629136	2327920	2666488	3405263	3544169
	2907168	2181925	1088916	3077772	2339996	2549078	2943848	2767495
Firefly/Renilla
	0.417755	0.0404015	0.295524	0.323735	0.424988	0.478299	0.55092	0.389155
	0.737525	0.0384643	0.458628	0.413483	0.437231	0.539105	0.680572	0.488585
	0.526563	0.0469196	0.357643	0.411614	0.394201	0.737499	0.664923	0.701007
	Dex 100 nM	Mif 1 μM	Z15 20 μM	Z15 5 μM	Z15 1.25 μM	Z15 0.31 μM	Z15 0.078 μM	Z15 0.019 μM
% of Dex group
	74.518	7.2067	52.7147	57.747	75.8082	85.3176	98.2716	69.4163
	131.558	6.86115	81.8088	73.756	77.992	96.164	121.398	87.1524
	93.9268	8.36938	63.7953	73.4226	70.3165	131.553	118.607	125.044
	Dex 100 nM	Mif 1 μM	Z15 20 μM	Z15 5 μM	Z15 1.25 μM	Z15 0.31 μM	Z15 0.078 μM	Z15 0.019 μM

## Sheet: Figure 1-figure supplement 33C
Cell lines	PC-3
Plasmids		ERE 100 ng + Renilla 3 ng
Firefly (ERE-luc)
	7969678	2157572	6000731	9572590	9302933	8921580	10597011	9635995
	9427912	2552026	7722132	8104526	11373500	10472291	9585362	7854379
	6491248	2149000	6325018	9125373	9544399	13176455	8300895	10523276
Renilla
	26678954	34160592	19000732	33806400	26193580	15674481	18402634	22343404
	29349598	36849700	18887368	27641882	22984016	18598592	18045118	21784728
	31682116	31364062	16867176	28405776	23492844	22365166	17492528	29885960
Firefly/Renilla
	0.298725	0.0631597	0.315816	0.283159	0.355161	0.569179	0.575842	0.431268
	0.321228	0.069255	0.408852	0.293197	0.494844	0.563069	0.531189	0.360545
	0.204887	0.0685179	0.37499	0.321251	0.406268	0.589151	0.474539	0.352114
	Dien 100 nM	Ful 1 μM	Z15 20 μM	Z15 5 μM	Z15 1.25 μM	Z15 0.31 μM	Z15 0.078 μM	Z15 0.019 μM
% of Dien group
	108.647	22.9713	114.863	102.986	129.173	207.012	209.435	156.853
	116.831	25.1882	148.7	106.637	179.976	204.79	193.195	131.131
	74.5178	24.9201	136.385	116.84	147.761	214.276	172.591	128.065
	Dien 100 nM	Ful 1 μM	Z15 20 μM	Z15 5 μM	Z15 1.25 μM	Z15 0.31 μM	Z15 0.078 μM	Z15 0.019 μM

## Sheet: Figure 1-figure supplement 3D
Cell lines	MCF7
Plasmids		GRE 100 ng + Renilla 3 ng
Firefly (GRE-luc)
	207916	27562	2445	73470	113316	163275	241483	230082
	199814	34055	1960	73156	160169	163430	259604	352010
	157972	19660	1643	43769	139473	222267	289463	188564
Renilla
	9588745	10182750	877515	4989721	7524666	10054308	10775786	10615351
	11111645	11598730	578709	4910057	8326936	9164930	11313583	12341981
	10003763	10788315	519775	4430278	8074046	10410680	11752066	11176763
Firefly/Renilla
	0.0216833	0.00270673	0.00278628	0.0147243	0.0150593	0.0162393	0.0224098	0.0216745
	0.0179824	0.0029361	0.00338685	0.0148992	0.019235	0.0178321	0.0229462	0.0285214
	0.0157913	0.00182234	0.00316098	0.00987952	0.0172742	0.0213499	0.0246308	0.0168711
	Pro 100 nM	Mif 1 μM	Z15 20 μM	Z15 5 μM	Z15 1.25 μM	Z15 0.31 μM	Z15 0.078 μM	Z15 0.019 μM
% of Pro group
	117.207	14.631	15.061	79.5906	81.4015	87.78	121.134	117.159
	97.2021	15.8708	18.3073	80.5363	103.973	96.3898	124.034	154.169
	85.3581	9.8505	17.0864	53.4028	93.3743	115.405	133.14	91.195
	Pro 100 nM	Mif 1 μM	Z15 20 μM	Z15 5 μM	Z15 1.25 μM	Z15 0.31 μM	Z15 0.078 μM	Z15 0.019 μM
