# Supplementary material for: Selective androgen receptor degrader (SARD) to overcome antiandrogen resistance in castration-resistant prostate cancer
Source: eLife journal article supplement (doi:10.7554/elife.70700), 2023-01-19
Supplement: data2 [file Figure 2-figure supplement 1A-G.xls]

## Sheet: Figure 2-figure supplement 1A-B
	Analysis of figure 2D
			Area	Mean	Min	Max	IntDen	RawIntDen		original ratio
	actin	1	517	159.193	12	249	82303	82303			AR/actin	PSA/actin
		2	460	171.565	36	248	78920	78920		1	1.09577	0.247014
		3	552	160.232	29	247	88448	88448		2	1.89693	1.49361
		4	612	153.668	28	246	94045	94045		3	0.625441	0.265614
		5	611	140.293	26	245	85719	85719		4	0.0180977	0.0834707
		6	689	168.978	24	247	116426	116426		5	0.258624	0.446622
										6	0.314474	0.445605
	AR	1	848	106.35	11	234	90185	90185	β	Relative ratio	AR/actin	PSA/actin
		2	901	166.155	40	233	149706	149706		1	0.577652	0.16538
		3	612	90.391	12	184	55319	55319		2	1	1			1.49361
		4	376	4.527	0	13	1702	1702		3	0.329711	0.177833
		5	550	40.307	13	73	22169	22169		4	0.00954051	0.055885
		6	572	64.009	16	120	36613	36613		5	0.136338	0.299021
										6	0.16578	0.29834
	PSA	1	638	31.865	6	46	20330	20330
		2	1288	91.519	16	157	117876	117876
		3	770	30.51	0	56	23493	23493
		4	728	10.783	3	18	7850	7850
		5	832	46.014	7	68	38284	38284
		6	867	59.839	20	89	51880	51880

## Sheet: Figure 2-figure supplement 1C-E
	Analysis of figure 2E
			Area	Mean	Min	Max	IntDen	RawIntDen		original ratio
	actin	1	896	185.729	16	252	166413	166413			AR/actin	ARV7/actin	PSA/actin
		2	969	175.179	26	252	169748	169748		1	0.411879	0.711525	0.623803
		3	810	172.791	33	252	139961	139961		2	0.655902	1.18794	0.551099
		4	945	143.905	27	252	135990	135990		3	0.546209	0.961482	0.558548
		5	770	171.283	22	252	131888	131888		4	0.160387	0.256497	0.260835
		6	944	139.218	8	252	131422	131422		5	0.530844	1.17588	0.490674
										6	0.471215	0.768646	0.457762
	AR	1	708	96.811	36	163	68542	68542		Relative ratio
		2	1003	111.005	15	221	111338	111338			AR/actin	ARV7/actin	PSA/actin
		3	896	85.321	23	163	76448	76448		1	0.62796	0.598957	1.13192
		4	770	28.326	7	60	21811	21811		2	1	1	0.999999				0.5511
		5	696	100.592	18	172	70012	70012		3	0.832763	0.809369	1.01352
		6	702	88.217	20	162	61928	61928		4	0.244529	0.215917	0.4733
										5	0.809337	0.989851	0.890354
	ARV7	7	840	140.961	47	190	118407	118407		6	0.718425	0.647041	0.830633
		8	1218	165.559	37	241	201651	201651
		9	1008	133.502	30	198	134570	134570
		10	912	38.247	12	62	34881	34881
		11	1080	143.597	32	222	155085	155085
		12	848	119.124	31	177	101017	101017
	PSA	1	1008	102.985	18	174	103809	103809
		2	980	95.457	13	171	93548	93548
		3	850	91.971	13	159	78175	78175
		4	616	57.583	19	83	35471	35471
		5	598	108.217	36	163	64714	64714
		6	676	88.994	27	129	60160	60160

## Sheet: Figure 2-figure supplement 1F-G
	Analysis of figure 2F
			Area	Mean	Min	Max	IntDen	RawIntDen			original ratio
	actin	1	574	188.427	30	249	108157	108157				AR/actin	PSA/actin
		2	494	197.923	49	249	97774	97774			1	0.932478	0.133399
		3	532	159	44	249	84588	84588			2	0.404729	0.679209
		4	504	142.742	33	248	71942	71942			3	0.600818	0.878813
		5	481	160.31	39	247	77109	77109			4	0.192252	0.0370715
		6	600	138.942	27	249	83365	83365			5	0.424127	0.567405
											6	0.409045	0.345445
	AR	1	561	179.775	49	244	100854	100854
		2	320	123.662	40	187	39572	39572			Relative ratio	AR/actin	PSA/actin
		3	330	154.006	72	233	50822	50822			1	1	0.196403		0.932478
		4	189	73.18	38	107	13831	13831			2	0.434036	0.999999			0.67921
		5	256	127.75	47	172	32704	32704			3	0.644324	1.29387
		6	288	118.403	43	160	34100	34100			4	0.206173	0.0545804
											5	0.454838	0.835389
											6	0.438664	0.508598
	psa	1	403	35.801	3	64	14428	14428
		2	493	134.704	20	207	66409	66409
		3	504	147.494	22	209	74337	74337
		4	224	11.906	0	31	2667	2667
		5	261	167.632	74	222	43752	43752
		6	341	84.452	25	126	28798	28798
