# Supplementary material for: Selective androgen receptor degrader (SARD) to overcome antiandrogen resistance in castration-resistant prostate cancer
Source: eLife journal article supplement (doi:10.7554/elife.70700), 2023-01-19
Supplement: data2 [file Figure 2-figure supplement 1H.xls]

	Area	Mean	Min	Max	IntDen	RawIntDen	Z15 concentration£¨uM)
1	692	134.199	12	249	92866	92866	0	actin
2	589	155.652	32	247	91679	91679	0.31
3	660	143.017	33	247	94391	94391	0.62
4	660	148.921	37	247	98288	98288	1.25
5	536	154.808	38	247	82977	82977	2.5
6	624	120.835	22	247	75401	75401	5
7	701	146.79	34	247	102900	102900	10
8	782	97.584	5	207	76311	76311	0	AR-1
9	660	97.811	14	188	64555	64555	0.31
10	596	69.81	15	124	41607	41607	0.62
11	484	70.574	20	115	34158	34158	1.25
12	708	68.075	11	149	48197	48197	2.5
13	428	62.379	21	121	26698	26698	5
14	596	30.871	8	66	18399	18399	10
	Area	Mean	Min	Max	IntDen	RawIntDen	Z15 concentration£¨uM)
1	648	157.347	34	241	101961	101961	0	actin
2	814	150.106	40	241	122186	122186	0.31
3	540	181.563	54	242	98044	98044	0.62
4	800	155.659	39	243	124527	124527	1.25
5	680	165.931	47	244	112833	112833	2.5
6	536	155.59	38	246	83396	83396	5
7	496	161.897	36	247	80301	80301	10
8	720	131.317	17	251	94548	94548	0	AR-1
9	642	179.564	58	251	115280	115280	0.31
10	387	145.256	32	251	56214	56214	0.62
11	256	164.754	54	243	42177	42177	1.25
12	312	125.151	66	199	39047	39047	2.5
13	223	111.525	35	166	24870	24870	5
14	380	21.35	5	44	8113	8113	10
	Area	Mean	Min	Max	IntDen	RawIntDen	Z15 concentration£¨uM)
1	549	167.268	26	245	91830	91830	0	actin
2	487	185.129	54	241	90158	90158	0.31
3	496	181.169	57	242	89860	89860	0.62
4	440	185.177	62	241	81478	81478	1.25
5	376	190.146	76	242	71495	71495	2.5
6	497	134.115	33	246	66655	66655	5
7	944	93.011	13	236	87802	87802	10
8	648	161.369	41	239	104567	104567	0	AR-1
9	376	163.061	67	238	61311	61311	0.31
10	376	104.348	40	181	39235	39235	0.62
11	474	84.85	17	156	40219	40219	1.25
12	369	69.732	25	117	25731	25731	2.5
13	384	40.591	13	78	15587	15587	5
14	287	21.822	5	39	6263	6263	10
