# Supplementary material for: Selective androgen receptor degrader (SARD) to overcome antiandrogen resistance in castration-resistant prostate cancer
Source: eLife journal article supplement (doi:10.7554/elife.70700), 2023-01-19
Supplement: data2 [file Figure 2-figure supplement 1I.xlsx]

## Sheet: Figure 2-figure supplement 1I
	Area	Mean	Min	Max	IntDen	RawIntDen	Z15 concentration（uM)
1	352	191.886	44	245	67544	67544	0	actin
2	364	182.033	72	238	66260	66260	0.31
3	392	182.574	65	241	71569	71569	0.62
4	301	207.103	80	240	62338	62338	1.25
5	285	194.4	67	241	55404	55404	2.5
6	383	189.363	53	243	72526	72526	5
7	334	142.048	52	225	47444	47444	10
8	364	155.956	47	224	56768	56768	0	AR
9	320	154.906	31	210	49570	49570	0.31
10	350	131.011	31	182	45854	45854	0.62
11	302	123.93	30	183	37427	37427	1.25
12	174	59.885	13	84	10420	10420	2.5
13	190	39.689	6	59	7541	7541	5
14	302	1.974	0	7	596	596	10
15	572	121.89	22	183	69721	69721	0	ARV7
16	662	133.595	28	205	88440	88440	0.31
17	519	143.262	47	205	74353	74353	0.62
18	440	117.982	30	169	51912	51912	1.25
19	368	62.671	18	88	23063	23063	2.5
20	352	39.443	11	55	13884	13884	5
21	452	2.777	0	8	1255	1255	10
	Area	Mean	Min	Max	IntDen	RawIntDen	Z15 concentration（uM)
1	756	157.185	15	252	83512	83512	0	actin
2	562	172.897	38	251	97168	97168	0.31
3	597	159.662	30	251	95318	95318	0.62
4	595	145.561	24	233	86609	86609	1.25
5	484	139.87	22	219	67697	67697	2.5
6	410	159.359	34	238	65337	65337	5
7	452	131.96	14	221	59646	59646	10
8	450	181.698	5	250	81764	81764	0	AR
9	377	168.438	22	247	63501	63501	0.31
10	232	165.159	8	247	38317	38317	0.62
11	328	95.646	8	178	31372	31372	1.25
12	342	85.088	7	204	29100	29100	2.5
13	269	73.249	3	175	19704	19704	5
14	220	8.277	0	25	1821	1821	10
15	710	106.432	10	236	75567	75567	0	ARV7
16	648	106.096	12	247	68750	68750	0.31
17	616	141.781	11	248	87337	87337	0.62
18	599	103.594	27	223	62053	62053	1.25
19	660	60.689	6	166	40055	40055	2.5
20	540	87.637	8	214	47324	47324	5
21	456	4.25	0	13	1938	1938	10
	Area	Mean	Min	Max	IntDen	RawIntDen	Z15 concentration（uM)
1	1016	109.236	7	246	110984	110984	0	actin
2	853	119.115	15	239	101605	101605	0.31
3	898	120.762	15	244	108444	108444	0.62
4	838	108.706	23	198	91096	91096	1.25
5	884	93.133	16	182	82330	82330	2.5
6	913	104.273	13	246	95201	95201	5
7	1714	60.917	3	219	104411	104411	10
8	681	123.433	3	249	84058	84058	0	AR
9	764	86.402	3	200	66011	66011	0.31
10	528	103.292	28	172	54538	54538	0.62
11	495	87.281	19	139	43204	43204	1.25
12	484	103.622	6	199	50153	50153	2.5
13	474	78.418	6	195	37170	37170	5
14	469	12.303	0	44	5770	5770	10
15	668	102.868	5	224	68716	68716	0	ARV7
16	420	90.517	31	137	38017	38017	0.31
17	502	93.259	33	164	46816	46816	0.62
18	474	100.458	35	169	47617	47617	1.25
19	390	116.441	27	181	45412	45412	2.5
20	456	123.215	28	219	56186	56186	5
21	447	19.105	1	48	8540	8540	10
	Area	Mean	Min	Max	IntDen	RawIntDen	Z15 concentration（uM)
1	518	159.046	17	245	82386	82386	0	actin
2	579	144.582	37	238	83713	83713	0.31
3	536	155.231	44	241	83204	83204	0.62
4	630	154.625	40	240	97414	97414	1.25
5	568	139.653	39	241	79323	79323	2.5
6	601	153.824	52	243	92448	92448	5
7	632	101.296	26	225	64019	64019	10
8	764	103.319	4	224	78936	78936	0	AR
9	512	126.559	22	210	64798	64798	0.31
10	551	102.936	22	182	56718	56718	0.62
11	498	97.701	19	183	48655	48655	1.25
12	300	50.673	7	84	15202	15202	2.5
13	415	29.687	7	59	12320	12320	5
14	369	1.751	0	8	646	646	10
15	861	103.197	0	183	88853	88853	0	ARV7
16	552	140.879	35	205	77765	77765	0.31
17	502	138.659	29	205	69607	69607	0.62
18	671	97.917	14	169	65702	65702	1.25
19	532	54.485	20	88	28986	28986	2.5
20	506	34.978	5	55	17699	17699	5
21	552	2.708	0	8	1495	1495	10
