# Supplementary material for: Selective androgen receptor degrader (SARD) to overcome antiandrogen resistance in castration-resistant prostate cancer
Source: eLife journal article supplement (doi:10.7554/elife.70700), 2023-01-19
Supplement: data2 [file Figure 2-figure supplement 2A-B.xlsx]

## Sheet: Diff_distribution
Compared sample name	Up-regulated	Down-regulated
LN2/LN1	11	34
LN3/LN1	33	69
LN3/LN2	16	20
LN1=DHT 5nM treated group
LN2=DHT 5nM + ARV-110 5 uM treated group
LN3=DHT 5nM + Z15 5 uM treated group

## Sheet: Figure 2-figure supplement 2A
Protein accession	Protein description	Gene name	LN2/LN1 Ratio	LN2/LN1 P value	Regulated Type	MW [kDa]	Coverage [%]	Peptides	Unique peptides	Razor + unique peptides	Razor + unique peptides LN1_1	Razor + unique peptides LN1_2	Razor + unique peptides LN1_3	Razor + unique peptides LN2_1	Razor + unique peptides LN2_2	Razor + unique peptides LN2_3	Razor + unique peptides LN3_1	Razor + unique peptides LN3_2	Razor + unique peptides LN3_3	LN1_1	LN1_2	LN1_3	LN2_1	LN2_2	LN2_3	LN3_1	LN3_2	LN3_3	Subcellular localization	KEGG KO No.	KEGG Gene	KEGG pathway	Biological Process	Cellular Component	Molecular Function	Pfam ID	Domain description	KOG category	KOG NO.	KOG description
O00488	Zinc finger protein 593 OS=Homo sapiens OX=9606 GN=ZNF593 PE=1 SV=2	ZNF593	0.592	0.0244026	Down	15.199	32.1	3	3	3	2	3	3	2	2	1	2	1	2	1.18234	1.51833	1.3591	0.712703	0.889312		0.742534		0.595683	nucleus	K14821			GO:0000054 ribosomal subunit export from nucleus; GO:0000055 ribosomal large subunit export from nucleus; GO:0006355 regulation of transcription, DNA-templated; GO:0006357 regulation of transcription by RNA polymerase II; GO:0006403 RNA localization; GO:0006405 RNA export from nucleus; GO:0006611 protein export from nucleus; GO:0006810 transport; GO:0006886 intracellular protein transport; GO:000…	GO:0005622 intracellular; GO:0005623 cell; GO:0005634 nucleus; GO:0005730 nucleolus; GO:0030684 preribosome; GO:0030687 preribosome, large subunit precursor; GO:0031974 membrane-enclosed lumen; GO:0031981 nuclear lumen; GO:0032991 protein-containing complex; GO:0043226 organelle; GO:0043227 membrane-bounded organelle; GO:0043228 non-membrane-bounded organelle; GO:0043229 intracellular organelle; …	GO:0000981 DNA-binding transcription factor activity, RNA polymerase II-specific; GO:0003700 DNA-binding transcription factor activity; GO:0005488 binding; GO:0008270 zinc ion binding; GO:0043021 ribonucleoprotein complex binding; GO:0043023 ribosomal large subunit binding; GO:0043167 ion binding; GO:0043169 cation binding; GO:0044877 protein-containing complex binding; GO:0046872 metal ion bindi…			K	KOG3408	U1-like Zn-finger-containing protein, probabl erole in RNA processing/splicing
O14965	Aurora kinase A OS=Homo sapiens OX=9606 GN=AURKA PE=1 SV=2	AURKA	0.551	0.00880712	Down	45.809	14.6	5	4	4	4	4	3	3	1	2	2	3	3	1.48329	1.44646	1.1718	0.75239		0.755603	0.546565	0.900047	0.943849	cytoplasm	K11481	AURKA; aurora kinase A [EC:2.7.11.1]	hsa04914 Progesterone-mediated oocyte maturation; hsa04114 Oocyte meiosis	GO:0000003 reproduction; GO:0000075 cell cycle checkpoint; GO:0000077 DNA damage checkpoint; GO:0000086 G2/M transition of mitotic cell cycle; GO:0000212 meiotic spindle organization; GO:0000226 microtubule cytoskeleton organization; GO:0000278 mitotic cell cycle; GO:0000280 nuclear division; GO:0000902 cell morphogenesis; GO:0001889 liver development; GO:0003002 regionalization; GO:0006325 chrom…	GO:0000228 nuclear chromosome; GO:0000775 chromosome, centromeric region; GO:0000779 condensed chromosome, centromeric region; GO:0000780 condensed nuclear chromosome, centromeric region; GO:0000793 condensed chromosome; GO:0000794 condensed nuclear chromosome; GO:0000922 spindle pole; GO:0001674 female germ cell nucleus; GO:0005622 intracellular; GO:0005623 cell; GO:0005634 nucleus; GO:0005654 n…	GO:0003824 catalytic activity; GO:0004672 protein kinase activity; GO:0004674 protein serine/threonine kinase activity; GO:0004712 protein serine/threonine/tyrosine kinase activity; GO:0005488 binding; GO:0005515 protein binding; GO:0016301 kinase activity; GO:0016740 transferase activity; GO:0016772 transferase activity, transferring phosphorus-containing groups; GO:0016773 phosphotransferase ac…	PF00069	Protein kinase domain	D	KOG0580	Serine/threonine protein kinase
O15270	Serine palmitoyltransferase 2 OS=Homo sapiens OX=9606 GN=SPTLC2 PE=1 SV=1	SPTLC2	0.65	0.0340383	Down	62.924	14.4	5	5	5	3	4	3	2	3	3	4	3	3	1.29176	1.52955	1.2558	0.991216	0.677248	0.981551	0.822898	0.685961	0.76402	cytoplasm	K00654	SPT; serine palmitoyltransferase [EC:2.3.1.50]	hsa00600 Sphingolipid metabolism; hsa04071 Sphingolipid signaling pathway; hsa01100 Metabolic pathways	GO:0006629 lipid metabolic process; GO:0006643 membrane lipid metabolic process; GO:0006665 sphingolipid metabolic process; GO:0006672 ceramide metabolic process; GO:0006807 nitrogen compound metabolic process; GO:0008152 metabolic process; GO:0008610 lipid biosynthetic process; GO:0009058 biosynthetic process; GO:0009893 positive regulation of metabolic process; GO:0009894 regulation of cataboli…	GO:0002178 palmitoyltransferase complex; GO:0005622 intracellular; GO:0005623 cell; GO:0005737 cytoplasm; GO:0005783 endoplasmic reticulum; GO:0005789 endoplasmic reticulum membrane; GO:0012505 endomembrane system; GO:0016020 membrane; GO:0017059 serine C-palmitoyltransferase complex; GO:0031211 endoplasmic reticulum palmitoyltransferase complex; GO:0031984 organelle subcompartment; GO:0032991 pr…	GO:0003824 catalytic activity; GO:0004758 serine C-palmitoyltransferase activity; GO:0016408 C-acyltransferase activity; GO:0016409 palmitoyltransferase activity; GO:0016454 C-palmitoyltransferase activity; GO:0016740 transferase activity; GO:0016746 transferase activity, transferring acyl groups; GO:0016747 transferase activity, transferring acyl groups other than amino-acyl groups;	PF00155	Aminotransferase class I and II	E	KOG1357	Serine palmitoyltransferase
O15393	Transmembrane protease serine 2 OS=Homo sapiens OX=9606 GN=TMPRSS2 PE=1 SV=3	TMPRSS2	0.661	0.000386601	Down	53.859	19.7	7	7	7	6	7	6	7	6	6	6	6	6	1.32519	1.34388	1.36349	0.830259	0.89266	0.94275	0.747521	0.787689	0.766559	plasma membrane	K09633	TMPRSS2; transmembrane protease serine 2 [EC:3.4.21.-]	hsa05215 Prostate cancer; hsa05164 Influenza A; hsa05202 Transcriptional misregulation in cancer; hsa05171 Coronavirus disease - COVID-19	GO:0006508 proteolysis; GO:0006807 nitrogen compound metabolic process; GO:0008152 metabolic process; GO:0010467 gene expression; GO:0016485 protein processing; GO:0016540 protein autoprocessing; GO:0019538 protein metabolic process; GO:0043170 macromolecule metabolic process; GO:0043900 regulation of multi-organism process; GO:0043902 positive regulation of multi-organism process; GO:0043903 reg…	GO:0005623 cell; GO:0005886 plasma membrane; GO:0005887 integral component of plasma membrane; GO:0016020 membrane; GO:0016021 integral component of membrane; GO:0031224 intrinsic component of membrane; GO:0031226 intrinsic component of plasma membrane; GO:0071944 cell periphery;	GO:0003824 catalytic activity; GO:0008233 peptidase activity; GO:0008236 serine-type peptidase activity; GO:0016787 hydrolase activity; GO:0017171 serine hydrolase activity; GO:0070011 peptidase activity, acting on L-amino acid peptides; GO:0140096 catalytic activity, acting on a protein;	PF00089	Trypsin	E	KOG3627	Trypsin
O95235	Kinesin-like protein KIF20A OS=Homo sapiens OX=9606 GN=KIF20A PE=1 SV=1	KIF20A	0.568	0.000187145	Down	100.28	26.6	18	18	18	10	17	14	9	11	11	8	8	5	1.48167	1.47872	1.46988	0.815874	0.790851	0.910472	0.703464	0.630476	0.71859	cytoplasm,nucleus	K10402			GO:0000226 microtubule cytoskeleton organization; GO:0000278 mitotic cell cycle; GO:0000281 mitotic cytokinesis; GO:0000910 cytokinesis; GO:0000920 septum digestion after cytokinesis; GO:0001578 microtubule bundle formation; GO:0006810 transport; GO:0006928 movement of cell or subcellular component; GO:0006996 organelle organization; GO:0007010 cytoskeleton organization; GO:0007017 microtubule-ba…	GO:0005576 extracellular region; GO:0005622 intracellular; GO:0005623 cell; GO:0005634 nucleus; GO:0005654 nucleoplasm; GO:0005737 cytoplasm; GO:0005794 Golgi apparatus; GO:0005819 spindle; GO:0005856 cytoskeleton; GO:0005871 kinesin complex; GO:0005875 microtubule associated complex; GO:0005886 plasma membrane; GO:0012505 endomembrane system; GO:0015630 microtubule cytoskeleton; GO:0016020 membr…	GO:0003774 motor activity; GO:0003777 microtubule motor activity; GO:0003824 catalytic activity; GO:0005215 transporter activity; GO:0005488 binding; GO:0005515 protein binding; GO:0016462 pyrophosphatase activity; GO:0016787 hydrolase activity; GO:0016817 hydrolase activity, acting on acid anhydrides; GO:0016818 hydrolase activity, acting on acid anhydrides, in phosphorus-containing anhydrides; …	PF00225	Kinesin motor domain	Z	KOG0247	Kinesin-like protein
P07288	Prostate-specific antigen OS=Homo sapiens OX=9606 GN=KLK3 PE=1 SV=2	KLK3	0.573	2.94783e-05	Down	28.741	58.2	8	8	8	8	7	8	7	7	7	6	5	6	1.50031	1.4379	1.54386	0.8581	0.879157	0.831074	0.677109	0.637946	0.634547	extracellular	K01351	KLK3; semenogelase [EC:3.4.21.77]	hsa05215 Prostate cancer; hsa05200 Pathways in cancer	GO:0002376 immune system process; GO:0002440 production of molecular mediator of immune response; GO:0002775 antimicrobial peptide production; GO:0002778 antibacterial peptide production; GO:0006508 proteolysis; GO:0006807 nitrogen compound metabolic process; GO:0006950 response to stress; GO:0006952 defense response; GO:0006955 immune response; GO:0006959 humoral immune response; GO:0008152 meta…	GO:0005576 extracellular region; GO:0005615 extracellular space; GO:0032991 protein-containing complex;	GO:0003824 catalytic activity; GO:0004175 endopeptidase activity; GO:0004252 serine-type endopeptidase activity; GO:0008233 peptidase activity; GO:0008236 serine-type peptidase activity; GO:0016787 hydrolase activity; GO:0016810 hydrolase activity, acting on carbon-nitrogen (but not peptide) bonds; GO:0016811 hydrolase activity, acting on carbon-nitrogen (but not peptide) bonds, in linear amides;…	PF00089	Trypsin	O	KOG3627	Trypsin
P10275	Androgen receptor OS=Homo sapiens OX=9606 GN=AR PE=1 SV=3	AR	0.205	1.38689e-07	Down	99.187	20.7	13	13	13	11	10	11	5	3	6	7	8	8	1.83927	1.92893	1.95195	0.386869	0.391948	0.396525	0.679154	0.712578	0.712768	nucleus	K08557	AR; androgen receptor	hsa05215 Prostate cancer; hsa05200 Pathways in cancer; hsa05207 Chemical carcinogenesis - receptor activation; hsa04114 Oocyte meiosis	GO:0000003 reproduction; GO:0000122 negative regulation of transcription by RNA polymerase II; GO:0001655 urogenital system development; GO:0003006 developmental process involved in reproduction; GO:0006139 nucleobase-containing compound metabolic process; GO:0006351 transcription, DNA-templated; GO:0006352 DNA-templated transcription, initiation; GO:0006355 regulation of transcription, DNA-templ…	GO:0000228 nuclear chromosome; GO:0000785 chromatin; GO:0000790 nuclear chromatin; GO:0005622 intracellular; GO:0005623 cell; GO:0005634 nucleus; GO:0005654 nucleoplasm; GO:0005694 chromosome; GO:0005737 cytoplasm; GO:0005829 cytosol; GO:0016604 nuclear body; GO:0016607 nuclear speck; GO:0031974 membrane-enclosed lumen; GO:0031981 nuclear lumen; GO:0032991 protein-containing complex; GO:0043226 o…	GO:0000976 transcription regulatory region sequence-specific DNA binding; GO:0000977 RNA polymerase II transcription regulatory region sequence-specific DNA binding; GO:0000978 RNA polymerase II cis-regulatory region sequence-specific DNA binding; GO:0000981 DNA-binding transcription factor activity, RNA polymerase II-specific; GO:0000987 cis-regulatory region sequence-specific DNA binding; GO:00…	PF00105; PF00104	Zinc finger, C4 type (two domains); Ligand-binding domain of nuclear hormone receptor	K	KOG3575	FOG: Hormone receptors
P18440	Arylamine N-acetyltransferase 1 OS=Homo sapiens OX=9606 GN=NAT1 PE=1 SV=2	NAT1	0.584	0.00159209	Down	33.898	23.4	6	6	6	4	4	6	5	5	4	5	4	3	1.37553	1.25997	1.58708	0.789784	0.83534	0.83997	0.835569	0.859804	0.616955	cytoplasm	K00622	nat; arylamine N-acetyltransferase [EC:2.3.1.5]	hsa00232 Caffeine metabolism; hsa05204 Chemical carcinogenesis - DNA adducts; hsa00983 Drug metabolism - other enzymes; hsa01100 Metabolic pathways	GO:0001666 response to hypoxia; GO:0002237 response to molecule of bacterial origin; GO:0003333 amino acid transmembrane transport; GO:0006805 xenobiotic metabolic process; GO:0006810 transport; GO:0006811 ion transport; GO:0006820 anion transport; GO:0006865 amino acid transport; GO:0006950 response to stress; GO:0007275 multicellular organism development; GO:0008152 metabolic process; GO:000941…	GO:0005622 intracellular; GO:0005623 cell; GO:0005737 cytoplasm; GO:0005829 cytosol; GO:0005886 plasma membrane; GO:0016020 membrane; GO:0071944 cell periphery;	GO:0003824 catalytic activity; GO:0004060 arylamine N-acetyltransferase activity; GO:0005215 transporter activity; GO:0005342 organic acid transmembrane transporter activity; GO:0008080 N-acetyltransferase activity; GO:0008509 anion transmembrane transporter activity; GO:0008514 organic anion transmembrane transporter activity; GO:0015075 ion transmembrane transporter activity; GO:0015171 amino a…
P30519	Heme oxygenase 2 OS=Homo sapiens OX=9606 GN=HMOX2 PE=1 SV=2	HMOX2	0.594	0.000398215	Down	36.032	56.6	12	12	12	11	10	10	8	9	9	10	12	9	1.18269	1.13367	1.22035	0.746296	0.709257	0.644947	1.15127	1.14518	1.06634	cytoplasm	K21418	HMOX2; heme oxygenase 2 [EC:1.14.14.18]	hsa00860 Porphyrin metabolism; hsa04978 Mineral absorption; hsa01100 Metabolic pathways	GO:0001666 response to hypoxia; GO:0001775 cell activation; GO:0002252 immune effector process; GO:0002263 cell activation involved in immune response; GO:0002274 myeloid leukocyte activation; GO:0002275 myeloid cell activation involved in immune response; GO:0002283 neutrophil activation involved in immune response; GO:0002366 leukocyte activation involved in immune response; GO:0002376 immune s…	GO:0005622 intracellular; GO:0005623 cell; GO:0005737 cytoplasm; GO:0005783 endoplasmic reticulum; GO:0005789 endoplasmic reticulum membrane; GO:0005886 plasma membrane; GO:0012505 endomembrane system; GO:0012506 vesicle membrane; GO:0016020 membrane; GO:0030141 secretory granule; GO:0030659 cytoplasmic vesicle membrane; GO:0030667 secretory granule membrane; GO:0031090 organelle membrane; GO:003…	GO:0003824 catalytic activity; GO:0004392 heme oxygenase (decyclizing) activity; GO:0005488 binding; GO:0016491 oxidoreductase activity; GO:0016705 oxidoreductase activity, acting on paired donors, with incorporation or reduction of molecular oxygen; GO:0020037 heme binding; GO:0046906 tetrapyrrole binding; GO:0048037 cofactor binding; GO:0097159 organic cyclic compound binding; GO:1901363 hetero…	PF01126	Heme oxygenase	P	KOG4480	Heme oxygenase
P31350	Ribonucleoside-diphosphate reductase subunit M2 OS=Homo sapiens OX=9606 GN=RRM2 PE=1 SV=1	RRM2	0.646	8.28323e-06	Down	44.877	52.4	16	14	16	16	16	16	15	15	16	15	16	14	1.36368	1.40252	1.37503	0.908651	0.870594	0.894686	0.712635	0.732689	0.739515	cytoplasm	K10808	RRM2; ribonucleoside-diphosphate reductase subunit M2 [EC:1.17.4.1]	hsa00983 Drug metabolism - other enzymes; hsa00480 Glutathione metabolism; hsa00240 Pyrimidine metabolism; hsa04115 p53 signaling pathway; hsa00230 Purine metabolism; hsa01100 Metabolic pathways	GO:0000082 G1/S transition of mitotic cell cycle; GO:0000083 regulation of transcription involved in G1/S transition of mitotic cell cycle; GO:0000278 mitotic cell cycle; GO:0006139 nucleobase-containing compound metabolic process; GO:0006355 regulation of transcription, DNA-templated; GO:0006725 cellular aromatic compound metabolic process; GO:0006753 nucleoside phosphate metabolic process; GO:0…	GO:0005622 intracellular; GO:0005623 cell; GO:0005737 cytoplasm; GO:0005829 cytosol; GO:0005971 ribonucleoside-diphosphate reductase complex; GO:0032991 protein-containing complex; GO:1902494 catalytic complex; GO:1990204 oxidoreductase complex;	GO:0003824 catalytic activity; GO:0004748 ribonucleoside-diphosphate reductase activity, thioredoxin disulfide as acceptor; GO:0016491 oxidoreductase activity; GO:0016725 oxidoreductase activity, acting on CH or CH2 groups; GO:0016728 oxidoreductase activity, acting on CH or CH2 groups, disulfide as acceptor; GO:0061731 ribonucleoside-diphosphate reductase activity;	PF00268	Ribonucleotide reductase, small chain	F	KOG1567	Ribonucleotide reductase, beta subunit
P36956	Sterol regulatory element-binding protein 1 OS=Homo sapiens OX=9606 GN=SREBF1 PE=1 SV=2	SREBF1	0.64	0.0335466	Down	121.67	6.5	5	5	5	1	4	4	2	1	4	1	2	3		1.33721	1.28436	0.907052		0.769622		0.914894	0.786863	nucleus	K07197	SREBP1; sterol regulatory element-binding transcription factor 1	hsa04936 Alcoholic liver disease; hsa04932 Non-alcoholic fatty liver disease; hsa04910 Insulin signaling pathway; hsa04931 Insulin resistance; hsa04152 AMPK signaling pathway	GO:0000122 negative regulation of transcription by RNA polymerase II; GO:0001101 response to acid chemical; GO:0002027 regulation of heart rate; GO:0002791 regulation of peptide secretion; GO:0002792 negative regulation of peptide secretion; GO:0003062 regulation of heart rate by chemical signal; GO:0006066 alcohol metabolic process; GO:0006139 nucleobase-containing compound metabolic process; GO…	GO:0000139 Golgi membrane; GO:0005622 intracellular; GO:0005623 cell; GO:0005634 nucleus; GO:0005635 nuclear envelope; GO:0005654 nucleoplasm; GO:0005737 cytoplasm; GO:0005783 endoplasmic reticulum; GO:0005789 endoplasmic reticulum membrane; GO:0005794 Golgi apparatus; GO:0005829 cytosol; GO:0012505 endomembrane system; GO:0016020 membrane; GO:0031090 organelle membrane; GO:0031967 organelle enve…	GO:0000976 transcription regulatory region sequence-specific DNA binding; GO:0000977 RNA polymerase II transcription regulatory region sequence-specific DNA binding; GO:0000978 RNA polymerase II cis-regulatory region sequence-specific DNA binding; GO:0000981 DNA-binding transcription factor activity, RNA polymerase II-specific; GO:0000987 cis-regulatory region sequence-specific DNA binding; GO:00…	PF00010	Helix-loop-helix DNA-binding domain	K	KOG2588	Predicted DNA-binding protein
P41567	Eukaryotic translation initiation factor 1 OS=Homo sapiens OX=9606 GN=EIF1 PE=1 SV=1	EIF1	0.611	0.00974477	Down	12.732	77.9	10	3	10	9	8	9	7	8	6	8	7	7	1.46936	1.14852	1.38207	0.879478	0.868228	0.695096	0.842046	0.841769	0.873436	cytoplasm	K03113			GO:0006412 translation; GO:0006413 translational initiation; GO:0006417 regulation of translation; GO:0006446 regulation of translational initiation; GO:0006518 peptide metabolic process; GO:0006807 nitrogen compound metabolic process; GO:0008152 metabolic process; GO:0009058 biosynthetic process; GO:0009059 macromolecule biosynthetic process; GO:0009889 regulation of biosynthetic process; GO:000…	GO:0005622 intracellular; GO:0005623 cell; GO:0005634 nucleus; GO:0005737 cytoplasm; GO:0043226 organelle; GO:0043227 membrane-bounded organelle; GO:0043229 intracellular organelle; GO:0043231 intracellular membrane-bounded organelle;	GO:0003676 nucleic acid binding; GO:0003723 RNA binding; GO:0003743 translation initiation factor activity; GO:0005488 binding; GO:0008135 translation factor activity, RNA binding; GO:0097159 organic cyclic compound binding; GO:1901363 heterocyclic compound binding;	PF01253	Translation initiation factor SUI1	J	KOG1770	Translation initiation factor 1 (eIF-1/SUI1)
P48200	Iron-responsive element-binding protein 2 OS=Homo sapiens OX=9606 GN=IREB2 PE=1 SV=4	IREB2	0.27	0.00113372	Down	105.06	10.8	6	6	6	4	6	4	4	3	1	1	0	0	1.5629	1.32512	1.34841	0.423346	0.340217					cytoplasm	K22416			GO:0000041 transition metal ion transport; GO:0001101 response to acid chemical; GO:0001666 response to hypoxia; GO:0002262 myeloid cell homeostasis; GO:0002376 immune system process; GO:0002520 immune system development; GO:0002521 leukocyte differentiation; GO:0002573 myeloid leukocyte differentiation; GO:0003008 system process; GO:0003012 muscle system process; GO:0006417 regulation of transla…	GO:0005622 intracellular; GO:0005623 cell; GO:0005737 cytoplasm; GO:0005783 endoplasmic reticulum; GO:0005794 Golgi apparatus; GO:0005829 cytosol; GO:0012505 endomembrane system; GO:0030424 axon; GO:0036477 somatodendritic compartment; GO:0042995 cell projection; GO:0043005 neuron projection; GO:0043025 neuronal cell body; GO:0043226 organelle; GO:0043227 membrane-bounded organelle; GO:0043229 in…	GO:0001067 regulatory region nucleic acid binding; GO:0001069 regulatory region RNA binding; GO:0003676 nucleic acid binding; GO:0003723 RNA binding; GO:0003729 mRNA binding; GO:0005488 binding; GO:0030350 iron-responsive element binding; GO:0030371 translation repressor activity; GO:0045182 translation regulator activity; GO:0048037 cofactor binding; GO:0051536 iron-sulfur cluster binding; GO:00…	PF00694	Aconitase C-terminal domain	AJ	KOG0452	RNA-binding translational regulator IRP (aconitase superfamily)
P48729	Casein kinase I isoform alpha OS=Homo sapiens OX=9606 GN=CSNK1A1 PE=1 SV=2	CSNK1A1	0.612	2.50649e-05	Down	38.914	47.5	13	13	13	11	13	11	10	10	9	10	11	11	1.2102	1.27514	1.24359	0.784713	0.755062	0.742462	1.01733	1.01291	0.958599	cytoplasm	K08957	CSNK1A; casein kinase 1, alpha [EC:2.7.11.1]	hsa04310 Wnt signaling pathway; hsa05224 Breast cancer; hsa05225 Hepatocellular carcinoma; hsa05165 Human papillomavirus infection; hsa05226 Gastric cancer; hsa05022 Pathways of neurodegeneration - multiple diseases; hsa04340 Hedgehog signaling pathway; hsa05010 Alzheimer disease	GO:0006464 cellular protein modification process; GO:0006468 protein phosphorylation; GO:0006793 phosphorus metabolic process; GO:0006796 phosphate-containing compound metabolic process; GO:0006807 nitrogen compound metabolic process; GO:0006810 transport; GO:0006897 endocytosis; GO:0006909 phagocytosis; GO:0006996 organelle organization; GO:0007010 cytoskeleton organization; GO:0007154 cell comm…	GO:0005622 intracellular; GO:0005623 cell; GO:0005634 nucleus; GO:0005654 nucleoplasm; GO:0005737 cytoplasm; GO:0005815 microtubule organizing center; GO:0005829 cytosol; GO:0005856 cytoskeleton; GO:0005929 cilium; GO:0015630 microtubule cytoskeleton; GO:0016604 nuclear body; GO:0016607 nuclear speck; GO:0030877 beta-catenin destruction complex; GO:0031974 membrane-enclosed lumen; GO:0031981 nucl…	GO:0000166 nucleotide binding; GO:0000287 magnesium ion binding; GO:0003824 catalytic activity; GO:0004672 protein kinase activity; GO:0004674 protein serine/threonine kinase activity; GO:0005488 binding; GO:0005515 protein binding; GO:0005524 ATP binding; GO:0008144 drug binding; GO:0016301 kinase activity; GO:0016740 transferase activity; GO:0016772 transferase activity, transferring phosphorus…	PF00069	Protein kinase domain	T	KOG1164	Casein kinase (serine/threonine/tyrosine protein kinase)
Q0VGL1	Ragulator complex protein LAMTOR4 OS=Homo sapiens OX=9606 GN=LAMTOR4 PE=1 SV=1	LAMTOR4	0.537	3.06672e-05	Down	10.741	28.3	2	2	2	2	2	2	1	2	2	1	1	2	1.25955	1.21652	1.24508		0.672597	0.660021			0.946226	extracellular	K20399	LAMTOR4; ragulator complex protein LAMTOR4	hsa04150 mTOR signaling pathway	GO:0001101 response to acid chemical; GO:0007049 cell cycle; GO:0007050 cell cycle arrest; GO:0008104 protein localization; GO:0008361 regulation of cell size; GO:0009719 response to endogenous stimulus; GO:0009894 regulation of catabolic process; GO:0009966 regulation of signal transduction; GO:0009967 positive regulation of signal transduction; GO:0009987 cellular process; GO:0010033 response t…	GO:0000323 lytic vacuole; GO:0005622 intracellular; GO:0005623 cell; GO:0005737 cytoplasm; GO:0005764 lysosome; GO:0005765 lysosomal membrane; GO:0005768 endosome; GO:0005770 late endosome; GO:0005773 vacuole; GO:0005774 vacuolar membrane; GO:0010008 endosome membrane; GO:0012505 endomembrane system; GO:0016020 membrane; GO:0031090 organelle membrane; GO:0031410 cytoplasmic vesicle; GO:0031902 la…
Q12834	Cell division cycle protein 20 homolog OS=Homo sapiens OX=9606 GN=CDC20 PE=1 SV=2	CDC20	0.474	0.000299672	Down	54.722	11.4	4	4	4	4	4	4	2	3	4	3	2	2	1.44538	1.55813	1.72781	0.782438	0.76511	0.694273	0.614149	0.787197	0.625516	nucleus	K03363	CDC20; cell division cycle 20, cofactor of APC complex	hsa04110 Cell cycle; hsa05203 Viral carcinogenesis; hsa05166 Human T-cell leukemia virus 1 infection; hsa04120 Ubiquitin mediated proteolysis; hsa04114 Oocyte meiosis	GO:0000070 mitotic sister chromatid segregation; GO:0000226 microtubule cytoskeleton organization; GO:0000278 mitotic cell cycle; GO:0000280 nuclear division; GO:0000819 sister chromatid segregation; GO:0006464 cellular protein modification process; GO:0006508 proteolysis; GO:0006511 ubiquitin-dependent protein catabolic process; GO:0006807 nitrogen compound metabolic process; GO:0006996 organell…	GO:0005622 intracellular; GO:0005623 cell; GO:0005634 nucleus; GO:0005654 nucleoplasm; GO:0005737 cytoplasm; GO:0005813 centrosome; GO:0005815 microtubule organizing center; GO:0005819 spindle; GO:0005829 cytosol; GO:0005856 cytoskeleton; GO:0015630 microtubule cytoskeleton; GO:0031974 membrane-enclosed lumen; GO:0031981 nuclear lumen; GO:0032991 protein-containing complex; GO:0043226 organelle; …	GO:0005488 binding; GO:0005515 protein binding; GO:0008022 protein C-terminus binding; GO:0019899 enzyme binding; GO:0042826 histone deacetylase binding;			DO	KOG0305	Anaphase promoting complex, Cdc20, Cdh1, and Ama1 subunits
Q12899	Tripartite motif-containing protein 26 OS=Homo sapiens OX=9606 GN=TRIM26 PE=1 SV=1	TRIM26	0.562	0.00362517	Down	62.165	17.1	7	7	7	4	6	6	3	3	4	2	4	5	1.37801	1.26536	1.4255	0.692872	0.690653	0.902394	0.803591	0.935245	0.906366	cytoplasm,nucleus	K12008			GO:0002376 immune system process; GO:0006355 regulation of transcription, DNA-templated; GO:0006950 response to stress; GO:0006952 defense response; GO:0006955 immune response; GO:0007154 cell communication; GO:0007165 signal transduction; GO:0007166 cell surface receptor signaling pathway; GO:0009889 regulation of biosynthetic process; GO:0009987 cellular process; GO:0010033 response to organic …	GO:0005622 intracellular; GO:0005623 cell; GO:0005737 cytoplasm; GO:0005829 cytosol;	GO:0003676 nucleic acid binding; GO:0003677 DNA binding; GO:0005488 binding; GO:0043167 ion binding; GO:0043169 cation binding; GO:0046872 metal ion binding; GO:0097159 organic cyclic compound binding; GO:1901363 heterocyclic compound binding;	PF00643	B-box zinc finger	K	KOG2177	Predicted E3 ubiquitin ligase
Q13433	Zinc transporter ZIP6 OS=Homo sapiens OX=9606 GN=SLC39A6 PE=1 SV=3	SLC39A6	0.446	0.0334988	Down	85.046	2.9	2	2	2	2	1	2	2	2	0	1	1	2	1.42178		1.2187	0.512086	0.666356				1.18107	plasma membrane	K14712	SLC39A6; solute carrier family 39 (zinc transporter), member 6	hsa05012 Parkinson disease; hsa05010 Alzheimer disease	GO:0000041 transition metal ion transport; GO:0006810 transport; GO:0006811 ion transport; GO:0006812 cation transport; GO:0006829 zinc ion transport; GO:0006873 cellular ion homeostasis; GO:0006875 cellular metal ion homeostasis; GO:0006882 cellular zinc ion homeostasis; GO:0009987 cellular process; GO:0019725 cellular homeostasis; GO:0030001 metal ion transport; GO:0030003 cellular cation homeo…	GO:0005622 intracellular; GO:0005623 cell; GO:0005737 cytoplasm; GO:0005783 endoplasmic reticulum; GO:0005886 plasma membrane; GO:0005887 integral component of plasma membrane; GO:0012505 endomembrane system; GO:0016020 membrane; GO:0016021 integral component of membrane; GO:0030027 lamellipodium; GO:0031224 intrinsic component of membrane; GO:0031226 intrinsic component of plasma membrane; GO:00…	GO:0005215 transporter activity; GO:0005385 zinc ion transmembrane transporter activity; GO:0008324 cation transmembrane transporter activity; GO:0015075 ion transmembrane transporter activity; GO:0015318 inorganic molecular entity transmembrane transporter activity; GO:0022857 transmembrane transporter activity; GO:0022890 inorganic cation transmembrane transporter activity; GO:0046873 metal ion…			P	KOG2693	Putative zinc transporter
Q15014	Mortality factor 4-like protein 2 OS=Homo sapiens OX=9606 GN=MORF4L2 PE=1 SV=1	MORF4L2	0.607	2.59231e-05	Down	32.307	37.5	9	7	9	8	8	8	6	7	7	7	8	7	1.39052	1.41714	1.3725	0.845032	0.81645	0.877574	0.789472	0.74091	0.750402	nucleus	K11342			GO:0006325 chromatin organization; GO:0006338 chromatin remodeling; GO:0006342 chromatin silencing; GO:0006355 regulation of transcription, DNA-templated; GO:0006357 regulation of transcription by RNA polymerase II; GO:0006464 cellular protein modification process; GO:0006473 protein acetylation; GO:0006475 internal protein amino acid acetylation; GO:0006476 protein deacetylation; GO:0006807 nitr…	GO:0000123 histone acetyltransferase complex; GO:0005622 intracellular; GO:0005623 cell; GO:0005634 nucleus; GO:0005654 nucleoplasm; GO:0005730 nucleolus; GO:0005886 plasma membrane; GO:0016020 membrane; GO:0031248 protein acetyltransferase complex; GO:0031974 membrane-enclosed lumen; GO:0031981 nuclear lumen; GO:0032991 protein-containing complex; GO:0035267 NuA4 histone acetyltransferase comple…				K	KOG3001	Dosage compensation regulatory complex/histone acetyltransferase complex, subunit MSL-3/MRG15/EAF3, and related CHROMO domain-containing proteins
Q6PIJ6	F-box only protein 38 OS=Homo sapiens OX=9606 GN=FBXO38 PE=1 SV=3	FBXO38	0.583	0.0151895	Down	133.94	6.7	6	6	6	4	5	3	5	3	4	4	4	4	1.39638	1.30283	1.03521	0.853292	0.609328	0.71493	0.998527	1.15724	0.932247	nucleus	K10313						PF00646	F-box domain
Q8IWF2	FAD-dependent oxidoreductase domain-containing protein 2 OS=Homo sapiens OX=9606 GN=FOXRED2 PE=1 SV=1	FOXRED2	0.664	0.0129469	Down	77.79	7.7	4	4	4	3	4	4	4	3	4	3	1	1	1.08228	1.42395	1.44325	0.860836	0.881461	0.878377	0.42984			extracellular				GO:0006508 proteolysis; GO:0006511 ubiquitin-dependent protein catabolic process; GO:0006807 nitrogen compound metabolic process; GO:0006950 response to stress; GO:0008152 metabolic process; GO:0009056 catabolic process; GO:0009057 macromolecule catabolic process; GO:0009987 cellular process; GO:0010033 response to organic substance; GO:0010243 response to organonitrogen compound; GO:0010498 prot…	GO:0005622 intracellular; GO:0005623 cell; GO:0005737 cytoplasm; GO:0005783 endoplasmic reticulum; GO:0005788 endoplasmic reticulum lumen; GO:0012505 endomembrane system; GO:0031974 membrane-enclosed lumen; GO:0043226 organelle; GO:0043227 membrane-bounded organelle; GO:0043229 intracellular organelle; GO:0043231 intracellular membrane-bounded organelle; GO:0043233 organelle lumen; GO:0070013 int…	GO:0000166 nucleotide binding; GO:0005488 binding; GO:0036094 small molecule binding; GO:0043167 ion binding; GO:0043168 anion binding; GO:0048037 cofactor binding; GO:0050660 flavin adenine dinucleotide binding; GO:0050662 coenzyme binding; GO:0097159 organic cyclic compound binding; GO:1901265 nucleoside phosphate binding; GO:1901363 heterocyclic compound binding;			O	KOG1399	Flavin-containing monooxygenase
Q8TF72	Protein Shroom3 OS=Homo sapiens OX=9606 GN=SHROOM3 PE=1 SV=2	SHROOM3	0.344	0.017201	Down	216.85	12.2	15	15	15	10	9	13	5	7	4	7	6	4	1.3704	1.92716	2.03961	0.656621	0.827329	0.352333	0.741658	0.786463	0.298423	nucleus	K18625			GO:0000902 cell morphogenesis; GO:0001838 embryonic epithelial tube formation; GO:0001841 neural tube formation; GO:0001843 neural tube closure; GO:0002009 morphogenesis of an epithelium; GO:0002064 epithelial cell development; GO:0002065 columnar/cuboidal epithelial cell differentiation; GO:0002066 columnar/cuboidal epithelial cell development; GO:0006996 organelle organization; GO:0007010 cytos…	GO:0005622 intracellular; GO:0005623 cell; GO:0005856 cytoskeleton; GO:0005886 plasma membrane; GO:0005911 cell-cell junction; GO:0005912 adherens junction; GO:0016020 membrane; GO:0016324 apical plasma membrane; GO:0030054 cell junction; GO:0043226 organelle; GO:0043228 non-membrane-bounded organelle; GO:0043229 intracellular organelle; GO:0043232 intracellular non-membrane-bounded organelle; GO…	GO:0003779 actin binding; GO:0005488 binding; GO:0005515 protein binding; GO:0008092 cytoskeletal protein binding;	PF00595	PDZ domain (Also known as DHR or GLGF)
Q92597	Protein NDRG1 OS=Homo sapiens OX=9606 GN=NDRG1 PE=1 SV=1	NDRG1	0.559	0.000245094	Down	42.835	47.2	11	11	11	10	10	10	9	10	9	11	11	11	1.31057	1.29741	1.41374	0.695236	0.761209	0.7917	0.945421	0.984677	0.800042	cytoplasm,nucleus	K18266			GO:0001666 response to hypoxia; GO:0001775 cell activation; GO:0002274 myeloid leukocyte activation; GO:0002376 immune system process; GO:0006950 response to stress; GO:0006974 cellular response to DNA damage stimulus; GO:0007009 plasma membrane organization; GO:0007154 cell communication; GO:0007165 signal transduction; GO:0007272 ensheathment of neurons; GO:0007275 multicellular organism develo…	GO:0005622 intracellular; GO:0005623 cell; GO:0005634 nucleus; GO:0005737 cytoplasm; GO:0005768 endosome; GO:0005813 centrosome; GO:0005815 microtubule organizing center; GO:0005829 cytosol; GO:0005856 cytoskeleton; GO:0005874 microtubule; GO:0005886 plasma membrane; GO:0005911 cell-cell junction; GO:0005912 adherens junction; GO:0010008 endosome membrane; GO:0012505 endomembrane system; GO:00156…	GO:0005488 binding; GO:0005515 protein binding; GO:0008017 microtubule binding; GO:0008092 cytoskeletal protein binding; GO:0015631 tubulin binding; GO:0017016 Ras GTPase binding; GO:0017137 Rab GTPase binding; GO:0019899 enzyme binding; GO:0031267 small GTPase binding; GO:0043015 gamma-tubulin binding; GO:0045296 cadherin binding; GO:0050839 cell adhesion molecule binding; GO:0051020 GTPase bind…	PF03096	Ndr family	S	KOG2931	Differentiation-related gene 1 protein (NDR1 protein), related proteins
Q96QD8	Sodium-coupled neutral amino acid transporter 2 OS=Homo sapiens OX=9606 GN=SLC38A2 PE=1 SV=2	SLC38A2	0.504	0.00086228	Down	56.025	7.3	2	2	2	2	2	2	1	1	2	2	2	2	1.20951	1.241	1.17317	0.571356		0.646381	1.02873	1.03126	1.09858	plasma membrane	K14207	SLC38A2; solute carrier family 38 (sodium-coupled neutral amino acid transporter), member 2	hsa04974 Protein digestion and absorption; hsa04724 Glutamatergic synapse; hsa04727 GABAergic synapse	GO:0000003 reproduction; GO:0003333 amino acid transmembrane transport; GO:0006810 transport; GO:0006811 ion transport; GO:0006812 cation transport; GO:0006820 anion transport; GO:0006835 dicarboxylic acid transport; GO:0006855 drug transmembrane transport; GO:0006865 amino acid transport; GO:0006868 glutamine transport; GO:0006950 response to stress; GO:0007154 cell communication; GO:0007275 mul…	GO:0005623 cell; GO:0005886 plasma membrane; GO:0005887 integral component of plasma membrane; GO:0005903 brush border; GO:0016020 membrane; GO:0016021 integral component of membrane; GO:0030424 axon; GO:0030425 dendrite; GO:0031224 intrinsic component of membrane; GO:0031226 intrinsic component of plasma membrane; GO:0036477 somatodendritic compartment; GO:0042383 sarcolemma; GO:0042995 cell pro…	GO:0005215 transporter activity; GO:0005342 organic acid transmembrane transporter activity; GO:0008324 cation transmembrane transporter activity; GO:0008509 anion transmembrane transporter activity; GO:0008514 organic anion transmembrane transporter activity; GO:0015075 ion transmembrane transporter activity; GO:0015171 amino acid transmembrane transporter activity; GO:0015175 neutral amino acid…			P	KOG1305	Amino acid transporter protein
Q99618	Cell division cycle-associated protein 3 OS=Homo sapiens OX=9606 GN=CDCA3 PE=1 SV=1	CDCA3	0.558	0.00623208	Down	28.998	15.3	2	2	2	2	2	2	2	1	2	1	1	1	1.09226	1.30221	1.24939	0.722801		0.633331				mitochondria					GO:0005911 cell-cell junction; GO:0005912 adherens junction; GO:0030054 cell junction; GO:0070161 anchoring junction;
Q99801	Homeobox protein Nkx-3.1 OS=Homo sapiens OX=9606 GN=NKX3-1 PE=1 SV=2	NKX3-1	0.534	0.00173733	Down	26.35	22.2	3	3	3	3	3	3	3	3	3	2	1	1	1.45019	1.4732	1.31422	0.795973	0.823701	0.644117	0.498596			nucleus	K09348	NKX3-1; homeobox protein Nkx-3.1	hsa05215 Prostate cancer; hsa05200 Pathways in cancer	GO:0000003 reproduction; GO:0001568 blood vessel development; GO:0001655 urogenital system development; GO:0001656 metanephros development; GO:0001666 response to hypoxia; GO:0001756 somitogenesis; GO:0001763 morphogenesis of a branching structure; GO:0001822 kidney development; GO:0001932 regulation of protein phosphorylation; GO:0001934 positive regulation of protein phosphorylation; GO:0001944…	GO:0005622 intracellular; GO:0005623 cell; GO:0005634 nucleus; GO:0043226 organelle; GO:0043227 membrane-bounded organelle; GO:0043229 intracellular organelle; GO:0043231 intracellular membrane-bounded organelle;	GO:0000976 transcription regulatory region sequence-specific DNA binding; GO:0000977 RNA polymerase II transcription regulatory region sequence-specific DNA binding; GO:0000978 RNA polymerase II cis-regulatory region sequence-specific DNA binding; GO:0000981 DNA-binding transcription factor activity, RNA polymerase II-specific; GO:0000987 cis-regulatory region sequence-specific DNA binding; GO:00…	PF00046	Homeobox domain	K	KOG0842	Transcription factor tinman/NKX2-3, contains HOX domain
Q9BW19	Kinesin-like protein KIFC1 OS=Homo sapiens OX=9606 GN=KIFC1 PE=1 SV=2	KIFC1	0.616	0.00083284	Down	73.747	23	11	11	11	9	10	9	6	6	8	6	5	3	1.39663	1.55316	1.30803	0.8413	0.888931	0.891273	0.746429	0.838774	0.535467	nucleus	K10405			GO:0000003 reproduction; GO:0000070 mitotic sister chromatid segregation; GO:0000226 microtubule cytoskeleton organization; GO:0000278 mitotic cell cycle; GO:0000280 nuclear division; GO:0000819 sister chromatid segregation; GO:0006810 transport; GO:0006928 movement of cell or subcellular component; GO:0006996 organelle organization; GO:0007010 cytoskeleton organization; GO:0007017 microtubule-ba…	GO:0000922 spindle pole; GO:0005622 intracellular; GO:0005623 cell; GO:0005634 nucleus; GO:0005737 cytoplasm; GO:0005813 centrosome; GO:0005815 microtubule organizing center; GO:0005819 spindle; GO:0005856 cytoskeleton; GO:0005871 kinesin complex; GO:0005875 microtubule associated complex; GO:0015630 microtubule cytoskeleton; GO:0030139 endocytic vesicle; GO:0030496 midbody; GO:0031410 cytoplasmi…	GO:0000166 nucleotide binding; GO:0003774 motor activity; GO:0003777 microtubule motor activity; GO:0003824 catalytic activity; GO:0005488 binding; GO:0005524 ATP binding; GO:0008144 drug binding; GO:0008569 ATP-dependent microtubule motor activity, minus-end-directed; GO:0016462 pyrophosphatase activity; GO:0016787 hydrolase activity; GO:0016817 hydrolase activity, acting on acid anhydrides; GO:…	PF00225	Kinesin motor domain	Z	KOG0239	Kinesin (KAR3 subfamily)
Q9BZQ6	ER degradation-enhancing alpha-mannosidase-like protein 3 OS=Homo sapiens OX=9606 GN=EDEM3 PE=1 SV=2	EDEM3	0.507	3.0413e-06	Down	104.66	11.8	8	8	8	5	7	6	5	3	4	4	4	3	1.4614	1.42619	1.4361	0.715737	0.721731	0.755102	0.787245	0.960987	0.735514	mitochondria	K10086	EDEM3; ER degradation enhancer, mannosidase alpha-like 3	hsa04141 Protein processing in endoplasmic reticulum	GO:0006464 cellular protein modification process; GO:0006491 N-glycan processing; GO:0006508 proteolysis; GO:0006511 ubiquitin-dependent protein catabolic process; GO:0006516 glycoprotein catabolic process; GO:0006517 protein deglycosylation; GO:0006807 nitrogen compound metabolic process; GO:0006950 response to stress; GO:0006986 response to unfolded protein; GO:0007154 cell communication; GO:00…	GO:0005622 intracellular; GO:0005623 cell; GO:0005737 cytoplasm; GO:0005783 endoplasmic reticulum; GO:0005788 endoplasmic reticulum lumen; GO:0012505 endomembrane system; GO:0031974 membrane-enclosed lumen; GO:0043226 organelle; GO:0043227 membrane-bounded organelle; GO:0043229 intracellular organelle; GO:0043231 intracellular membrane-bounded organelle; GO:0043233 organelle lumen; GO:0044322 end…	GO:0003824 catalytic activity; GO:0004553 hydrolase activity, hydrolyzing O-glycosyl compounds; GO:0004559 alpha-mannosidase activity; GO:0004571 mannosyl-oligosaccharide 1,2-alpha-mannosidase activity; GO:0015923 mannosidase activity; GO:0015924 mannosyl-oligosaccharide mannosidase activity; GO:0016787 hydrolase activity; GO:0016798 hydrolase activity, acting on glycosyl bonds;	PF01532	Glycosyl hydrolase family 47	G	KOG2430	Glycosyl hydrolase, family 47
Q9H0U9	Testis-specific Y-encoded-like protein 1 OS=Homo sapiens OX=9606 GN=TSPYL1 PE=1 SV=3	TSPYL1	0.638	0.00168727	Down	49.192	20.8	7	7	7	7	6	6	5	5	5	5	4	4	1.28576	1.35139	1.26184	0.737788	0.876286	0.87288	0.933321	0.796531	0.884205	cytoplasm	K11284				GO:0005622 intracellular; GO:0005623 cell; GO:0005634 nucleus; GO:0005730 nucleolus; GO:0031974 membrane-enclosed lumen; GO:0031981 nuclear lumen; GO:0043226 organelle; GO:0043227 membrane-bounded organelle; GO:0043228 non-membrane-bounded organelle; GO:0043229 intracellular organelle; GO:0043231 intracellular membrane-bounded organelle; GO:0043232 intracellular non-membrane-bounded organelle; GO…	GO:0005488 binding; GO:0005515 protein binding; GO:0019899 enzyme binding;			L	KOG1508	DNA replication factor/protein phosphatase inhibitor SET/SPR-2
Q9H967	WD repeat-containing protein 76 OS=Homo sapiens OX=9606 GN=WDR76 PE=1 SV=2	WDR76	0.648	0.00308941	Down	69.768	6.5	3	3	3	2	3	2	2	3	3	2	2	2	1.35071	1.15518	1.28562	0.73966	0.857799	0.860301	0.926155	1.09221	0.732367	nucleus	K24755			GO:0048583 regulation of response to stimulus; GO:0050789 regulation of biological process; GO:0050794 regulation of cellular process; GO:0051726 regulation of cell cycle; GO:0065007 biological regulation; GO:0080134 regulation of response to stress; GO:0080135 regulation of cellular response to stress; GO:1901976 regulation of cell cycle checkpoint; GO:2000001 regulation of DNA damage checkpoint…	GO:0005622 intracellular; GO:0005623 cell; GO:0005634 nucleus; GO:0043226 organelle; GO:0043227 membrane-bounded organelle; GO:0043229 intracellular organelle; GO:0043231 intracellular membrane-bounded organelle;	GO:0003676 nucleic acid binding; GO:0003677 DNA binding; GO:0005488 binding; GO:0097159 organic cyclic compound binding; GO:1901363 heterocyclic compound binding;			S	KOG4328	WD40 protein
Q9NV92	NEDD4 family-interacting protein 2 OS=Homo sapiens OX=9606 GN=NDFIP2 PE=1 SV=2	NDFIP2	0.572	0.0448038	Down	36.389	7.4	2	2	2	2	2	2	2	2	2	2	2	1	1.06094	1.87657	1.16635	0.765536	0.724417	0.857295	0.787932	0.760957		plasma membrane				GO:0009892 negative regulation of metabolic process; GO:0009893 positive regulation of metabolic process; GO:0009966 regulation of signal transduction; GO:0009967 positive regulation of signal transduction; GO:0010468 regulation of gene expression; GO:0010604 positive regulation of macromolecule metabolic process; GO:0010605 negative regulation of macromolecule metabolic process; GO:0010629 negat…	GO:0005622 intracellular; GO:0005623 cell; GO:0005737 cytoplasm; GO:0005739 mitochondrion; GO:0005783 endoplasmic reticulum; GO:0005794 Golgi apparatus; GO:0012505 endomembrane system; GO:0016020 membrane; GO:0016021 integral component of membrane; GO:0031224 intrinsic component of membrane; GO:0043226 organelle; GO:0043227 membrane-bounded organelle; GO:0043229 intracellular organelle; GO:004323…	GO:0005488 binding; GO:0005515 protein binding; GO:0019904 protein domain specific binding; GO:0050699 WW domain binding;			U	KOG4812	Golgi-associated protein/Nedd4 WW domain-binding protein
Q9NVP2	Histone chaperone ASF1B OS=Homo sapiens OX=9606 GN=ASF1B PE=1 SV=1	ASF1B	0.635	0.0160025	Down	22.433	45	6	5	6	6	6	6	5	5	5	6	4	5	1.42482	1.45066	1.37786	0.942102	0.712267	1.04845	0.65645	0.642613	0.744781	extracellular	K10753			GO:0006323 DNA packaging; GO:0006325 chromatin organization; GO:0006333 chromatin assembly or disassembly; GO:0006334 nucleosome assembly; GO:0006335 DNA replication-dependent nucleosome assembly; GO:0006336 DNA replication-independent nucleosome assembly; GO:0006996 organelle organization; GO:0009987 cellular process; GO:0016043 cellular component organization; GO:0022607 cellular component asse…	GO:0000228 nuclear chromosome; GO:0000785 chromatin; GO:0000790 nuclear chromatin; GO:0005622 intracellular; GO:0005623 cell; GO:0005634 nucleus; GO:0005654 nucleoplasm; GO:0005694 chromosome; GO:0031974 membrane-enclosed lumen; GO:0031981 nuclear lumen; GO:0032991 protein-containing complex; GO:0043226 organelle; GO:0043227 membrane-bounded organelle; GO:0043228 non-membrane-bounded organelle; G…	GO:0005488 binding; GO:0005515 protein binding; GO:0042393 histone binding;			B	KOG3265	Histone chaperone involved in gene silencing
Q9NYZ3	G2 and S phase-expressed protein 1 OS=Homo sapiens OX=9606 GN=GTSE1 PE=1 SV=3	GTSE1	0.656	0.0162753	Down	76.644	14.7	6	6	6	6	5	6	4	5	5	5	4	4	1.20815	1.36042	1.26816	0.798735	0.710173	1.00683	0.815082	0.943871	0.888575	nucleus	K10129	GTSE1; G-2 and S-phase expressed protein 1	hsa04115 p53 signaling pathway	GO:0000075 cell cycle checkpoint; GO:0000077 DNA damage checkpoint; GO:0000278 mitotic cell cycle; GO:0006950 response to stress; GO:0006974 cellular response to DNA damage stimulus; GO:0006977 DNA damage response, signal transduction by p53 class mediator resulting in cell cycle arrest; GO:0007017 microtubule-based process; GO:0007049 cell cycle; GO:0007093 mitotic cell cycle checkpoint; GO:0007…	GO:0005622 intracellular; GO:0005623 cell; GO:0005634 nucleus; GO:0005654 nucleoplasm; GO:0005737 cytoplasm; GO:0005829 cytosol; GO:0005856 cytoskeleton; GO:0005874 microtubule; GO:0005881 cytoplasmic microtubule; GO:0015630 microtubule cytoskeleton; GO:0031974 membrane-enclosed lumen; GO:0031981 nuclear lumen; GO:0043226 organelle; GO:0043227 membrane-bounded organelle; GO:0043228 non-membrane-b…
Q9Y4U1	Cyanocobalamin reductase / alkylcobalamin dealkylase OS=Homo sapiens OX=9606 GN=MMACHC PE=1 SV=3	MMACHC	0.556	0.0266127	Down	31.728	24.8	5	5	5	3	5	3	4	4	3	1	2	2	1.78116	1.31647	1.3973	1.09339	0.676066	0.730363		0.469294	0.535962	cytoplasm,nucleus	K14618	MMACHC; cyanocobalamin reductase (cyanide-eliminating) / alkylcobalamin dealkylase [EC:1.16.1.6 2.5.1.151]	hsa04977 Vitamin digestion and absorption	GO:0006518 peptide metabolic process; GO:0006575 cellular modified amino acid metabolic process; GO:0006725 cellular aromatic compound metabolic process; GO:0006749 glutathione metabolic process; GO:0006766 vitamin metabolic process; GO:0006767 water-soluble vitamin metabolic process; GO:0006790 sulfur compound metabolic process; GO:0006807 nitrogen compound metabolic process; GO:0008152 metaboli…	GO:0005622 intracellular; GO:0005623 cell; GO:0005737 cytoplasm; GO:0005829 cytosol;	GO:0000166 nucleotide binding; GO:0003824 catalytic activity; GO:0005488 binding; GO:0005515 protein binding; GO:0016491 oxidoreductase activity; GO:0016722 oxidoreductase activity, oxidizing metal ions; GO:0016723 oxidoreductase activity, oxidizing metal ions, NAD or NADP as acceptor; GO:0032451 demethylase activity; GO:0033218 amide binding; GO:0033787 cyanocobalamin reductase (cyanide-eliminat…			C	KOG4552	Vitamin-D-receptor interacting protein complex component
P07305	Histone H1.0 OS=Homo sapiens OX=9606 GN=H1-0 PE=1 SV=3	H1-0	1.772	0.0220737	Up	20.863	27.3	5	4	5	2	4	4	4	4	4	3	3	4	0.525783	0.886105	0.802722	1.27342	1.2518	1.39873	1.01316	1.01632	0.831953	nucleus	K11275			GO:0000737 DNA catabolic process, endonucleolytic; GO:0006139 nucleobase-containing compound metabolic process; GO:0006259 DNA metabolic process; GO:0006308 DNA catabolic process; GO:0006309 apoptotic DNA fragmentation; GO:0006725 cellular aromatic compound metabolic process; GO:0006807 nitrogen compound metabolic process; GO:0006915 apoptotic process; GO:0006921 cellular component disassembly in…	GO:0000228 nuclear chromosome; GO:0000785 chromatin; GO:0000790 nuclear chromatin; GO:0000791 euchromatin; GO:0005622 intracellular; GO:0005623 cell; GO:0005634 nucleus; GO:0005654 nucleoplasm; GO:0005694 chromosome; GO:0005719 nuclear euchromatin; GO:0005737 cytoplasm; GO:0005794 Golgi apparatus; GO:0005856 cytoskeleton; GO:0012505 endomembrane system; GO:0015629 actin cytoskeleton; GO:0016604 n…	GO:0003676 nucleic acid binding; GO:0003677 DNA binding; GO:0003680 AT DNA binding; GO:0003682 chromatin binding; GO:0003690 double-stranded DNA binding; GO:0005488 binding; GO:0031490 chromatin DNA binding; GO:0043565 sequence-specific DNA binding; GO:0097159 organic cyclic compound binding; GO:1901363 heterocyclic compound binding; GO:1990837 sequence-specific double-stranded DNA binding;	PF00538	linker histone H1 and H5 family	B	KOG4012	Histone H1
P14209	CD99 antigen OS=Homo sapiens OX=9606 GN=CD99 PE=1 SV=1	CD99	1.649	0.0260138	Up	18.848	29.7	3	3	3	3	3	3	3	3	3	3	3	3	0.628807	0.63612	0.60012	0.835456	0.92289	1.31696	1.36692	1.46637	1.22636	extracellular	K06520	CD99; CD99 antigen	hsa04670 Leukocyte transendothelial migration; hsa04514 Cell adhesion molecules	GO:0002682 regulation of immune system process; GO:0048583 regulation of response to stimulus; GO:0050776 regulation of immune response; GO:0050789 regulation of biological process; GO:0065007 biological regulation;	GO:0005622 intracellular; GO:0005623 cell; GO:0005737 cytoplasm; GO:0005886 plasma membrane; GO:0005887 integral component of plasma membrane; GO:0016020 membrane; GO:0016021 integral component of membrane; GO:0031224 intrinsic component of membrane; GO:0031226 intrinsic component of plasma membrane; GO:0071944 cell periphery;
P16401	Histone H1.5 OS=Homo sapiens OX=9606 GN=H1-5 PE=1 SV=3	H1-5	1.873	0.00463331	Up	22.58	25.7	6	5	5	2	4	3	4	3	4	4	3	3	0.593422	0.84934	0.781832	1.45593	1.32686	1.38413	0.893364	0.922428	0.792685	nucleus	K11275			GO:0000122 negative regulation of transcription by RNA polymerase II; GO:0001558 regulation of cell growth; GO:0006325 chromatin organization; GO:0006355 regulation of transcription, DNA-templated; GO:0006357 regulation of transcription by RNA polymerase II; GO:0006996 organelle organization; GO:0007275 multicellular organism development; GO:0007517 muscle organ development; GO:0008104 protein lo…	GO:0000228 nuclear chromosome; GO:0000785 chromatin; GO:0000790 nuclear chromatin; GO:0000792 heterochromatin; GO:0005622 intracellular; GO:0005623 cell; GO:0005634 nucleus; GO:0005694 chromosome; GO:0005720 nuclear heterochromatin; GO:0031974 membrane-enclosed lumen; GO:0031981 nuclear lumen; GO:0043226 organelle; GO:0043227 membrane-bounded organelle; GO:0043228 non-membrane-bounded organelle; …	GO:0003676 nucleic acid binding; GO:0003677 DNA binding; GO:0003682 chromatin binding; GO:0005488 binding; GO:0005515 protein binding; GO:0019899 enzyme binding; GO:0031490 chromatin DNA binding; GO:0042826 histone deacetylase binding; GO:0097159 organic cyclic compound binding; GO:1901363 heterocyclic compound binding;	PF00538	linker histone H1 and H5 family	B	KOG4012	Histone H1
P23769	Endothelial transcription factor GATA-2 OS=Homo sapiens OX=9606 GN=GATA2 PE=1 SV=3	GATA2	2.083	0.0235809	Up	50.499	17.5	6	6	6	2	2	3	5	5	6	5	5	3		0.448536	0.721841	1.25011	1.21866	1.18761	1.22294	1.07766	0.872641	nucleus	K17894			GO:0000003 reproduction; GO:0000122 negative regulation of transcription by RNA polymerase II; GO:0001655 urogenital system development; GO:0001701 in utero embryonic development; GO:0001709 cell fate determination; GO:0001764 neuron migration; GO:0001890 placenta development; GO:0001892 embryonic placenta development; GO:0001894 tissue homeostasis; GO:0001936 regulation of endothelial cell proli…	GO:0005622 intracellular; GO:0005623 cell; GO:0005634 nucleus; GO:0005654 nucleoplasm; GO:0005667 transcription regulator complex; GO:0005737 cytoplasm; GO:0031974 membrane-enclosed lumen; GO:0031981 nuclear lumen; GO:0032991 protein-containing complex; GO:0043226 organelle; GO:0043227 membrane-bounded organelle; GO:0043229 intracellular organelle; GO:0043231 intracellular membrane-bounded organe…	GO:0000976 transcription regulatory region sequence-specific DNA binding; GO:0000977 RNA polymerase II transcription regulatory region sequence-specific DNA binding; GO:0000978 RNA polymerase II cis-regulatory region sequence-specific DNA binding; GO:0000981 DNA-binding transcription factor activity, RNA polymerase II-specific; GO:0000987 cis-regulatory region sequence-specific DNA binding; GO:00…	PF00320	GATA zinc finger	K	KOG1601	GATA-4/5/6 transcription factors
P36941	Tumor necrosis factor receptor superfamily member 3 OS=Homo sapiens OX=9606 GN=LTBR PE=1 SV=1	LTBR	1.52	0.0183085	Up	46.709	5.7	2	2	2	2	1	2	1	2	2	2	2	1		0.850439	0.790606	1.32789	1.32459	1.09033	0.806224	0.809925		plasma membrane	K03159	TNFRSF3; lymphotoxin beta receptor TNFR superfamily member 3	hsa04066 HIF-1 signaling pathway; hsa04064 NF-kappa B signaling pathway; hsa04060 Cytokine-cytokine receptor interaction; hsa04672 Intestinal immune network for IgA production; hsa04061 Viral protein interaction with cytokine and cytokine receptor; hsa05203 Viral carcinogenesis; hsa05166 Human T-cell leukemia virus 1 infection	GO:0001773 myeloid dendritic cell activation; GO:0001775 cell activation; GO:0001932 regulation of protein phosphorylation; GO:0001934 positive regulation of protein phosphorylation; GO:0002237 response to molecule of bacterial origin; GO:0002274 myeloid leukocyte activation; GO:0002376 immune system process; GO:0002520 immune system development; GO:0002521 leukocyte differentiation; GO:0002573 m…	GO:0005622 intracellular; GO:0005623 cell; GO:0005737 cytoplasm; GO:0005794 Golgi apparatus; GO:0005886 plasma membrane; GO:0005887 integral component of plasma membrane; GO:0012505 endomembrane system; GO:0016020 membrane; GO:0016021 integral component of membrane; GO:0031224 intrinsic component of membrane; GO:0031226 intrinsic component of plasma membrane; GO:0043226 organelle; GO:0043227 memb…	GO:0004888 transmembrane signaling receptor activity; GO:0005031 tumor necrosis factor-activated receptor activity; GO:0005035 death receptor activity; GO:0005488 binding; GO:0005515 protein binding; GO:0019899 enzyme binding; GO:0031625 ubiquitin protein ligase binding; GO:0038023 signaling receptor activity; GO:0042802 identical protein binding; GO:0044389 ubiquitin-like protein ligase binding;…	PF00020	TNFR/NGFR cysteine-rich region
P37268	Squalene synthase OS=Homo sapiens OX=9606 GN=FDFT1 PE=1 SV=1	FDFT1	1.87	5.81259e-05	Up	48.115	49.6	17	17	17	11	14	13	17	14	16	10	11	10	0.87077	0.838653	0.794868	1.56367	1.62157	1.49719	0.61656	0.626824	0.569888	cytoplasm	K00801	FDFT1; farnesyl-diphosphate farnesyltransferase [EC:2.5.1.21]	hsa00100 Steroid biosynthesis; hsa01100 Metabolic pathways	GO:0006066 alcohol metabolic process; GO:0006629 lipid metabolic process; GO:0006644 phospholipid metabolic process; GO:0006694 steroid biosynthetic process; GO:0006695 cholesterol biosynthetic process; GO:0006720 isoprenoid metabolic process; GO:0006721 terpenoid metabolic process; GO:0006793 phosphorus metabolic process; GO:0006796 phosphate-containing compound metabolic process; GO:0008152 met…	GO:0005622 intracellular; GO:0005623 cell; GO:0005737 cytoplasm; GO:0005783 endoplasmic reticulum; GO:0005789 endoplasmic reticulum membrane; GO:0012505 endomembrane system; GO:0016020 membrane; GO:0016021 integral component of membrane; GO:0031224 intrinsic component of membrane; GO:0031984 organelle subcompartment; GO:0042175 nuclear outer membrane-endoplasmic reticulum membrane network; GO:004…	GO:0003824 catalytic activity; GO:0004310 farnesyl-diphosphate farnesyltransferase activity; GO:0004311 farnesyltranstransferase activity; GO:0004659 prenyltransferase activity; GO:0016740 transferase activity; GO:0016765 transferase activity, transferring alkyl or aryl (other than methyl) groups; GO:0051996 squalene synthase activity;	PF00494	Squalene/phytoene synthase	I	KOG1459	Squalene synthetase
P78540	Arginase-2, mitochondrial OS=Homo sapiens OX=9606 GN=ARG2 PE=1 SV=1	ARG2	1.625	0.00235721	Up	38.577	35.9	8	8	8	4	4	6	6	6	7	5	5	6	0.758868	0.752837	0.617633	1.10687	1.19983	1.15301	1.17912	1.1476	1.08424	mitochondria	K01476	E3.5.3.1; arginase [EC:3.5.3.1]	hsa05146 Amoebiasis; hsa00220 Arginine biosynthesis; hsa01230 Biosynthesis of amino acids; hsa00330 Arginine and proline metabolism; hsa01100 Metabolic pathways	GO:0000003 reproduction; GO:0000050 urea cycle; GO:0001101 response to acid chemical; GO:0001505 regulation of neurotransmitter levels; GO:0001655 urogenital system development; GO:0001657 ureteric bud development; GO:0001666 response to hypoxia; GO:0001817 regulation of cytokine production; GO:0001818 negative regulation of cytokine production; GO:0001822 kidney development; GO:0001823 mesonephr…	GO:0005622 intracellular; GO:0005623 cell; GO:0005737 cytoplasm; GO:0005739 mitochondrion; GO:0005759 mitochondrial matrix; GO:0031974 membrane-enclosed lumen; GO:0043226 organelle; GO:0043227 membrane-bounded organelle; GO:0043229 intracellular organelle; GO:0043231 intracellular membrane-bounded organelle; GO:0043233 organelle lumen; GO:0070013 intracellular organelle lumen;	GO:0003824 catalytic activity; GO:0004053 arginase activity; GO:0005488 binding; GO:0005515 protein binding; GO:0016787 hydrolase activity; GO:0016810 hydrolase activity, acting on carbon-nitrogen (but not peptide) bonds; GO:0016813 hydrolase activity, acting on carbon-nitrogen (but not peptide) bonds, in linear amidines; GO:0019899 enzyme binding; GO:0050998 nitric-oxide synthase binding;	PF00491	Arginase family	E	KOG2965	Arginase
Q14534	Squalene monooxygenase OS=Homo sapiens OX=9606 GN=SQLE PE=1 SV=3	SQLE	2.298	0.0012551	Up	63.922	20.2	7	7	7	4	5	6	7	6	5	4	3	3	0.662041	0.900571	0.67336	1.6365	1.80259	1.69996	0.597576	0.465277	0.562125	plasma membrane	K00511	SQLE; squalene monooxygenase [EC:1.14.14.17]	hsa00100 Steroid biosynthesis; hsa01100 Metabolic pathways	GO:0006066 alcohol metabolic process; GO:0006629 lipid metabolic process; GO:0006694 steroid biosynthetic process; GO:0006695 cholesterol biosynthetic process; GO:0006725 cellular aromatic compound metabolic process; GO:0008152 metabolic process; GO:0008202 steroid metabolic process; GO:0008203 cholesterol metabolic process; GO:0008610 lipid biosynthetic process; GO:0009058 biosynthetic process; …	GO:0005622 intracellular; GO:0005623 cell; GO:0005737 cytoplasm; GO:0005783 endoplasmic reticulum; GO:0005789 endoplasmic reticulum membrane; GO:0012505 endomembrane system; GO:0016020 membrane; GO:0031090 organelle membrane; GO:0031984 organelle subcompartment; GO:0042175 nuclear outer membrane-endoplasmic reticulum membrane network; GO:0043226 organelle; GO:0043227 membrane-bounded organelle; G…	GO:0003824 catalytic activity; GO:0004497 monooxygenase activity; GO:0004506 squalene monooxygenase activity; GO:0016491 oxidoreductase activity; GO:0016705 oxidoreductase activity, acting on paired donors, with incorporation or reduction of molecular oxygen; GO:0016709 oxidoreductase activity, acting on paired donors, with incorporation or reduction of molecular oxygen, NAD(P)H as one donor, and…	PF13450	NAD(P)-binding Rossmann-like domain	I	KOG1298	Squalene monooxygenase
Q71F23	Centromere protein U OS=Homo sapiens OX=9606 GN=CENPU PE=1 SV=1	CENPU	1.552	0.0369879	Up	47.521	13.4	4	4	4	3	3	3	2	3	4	3	4	2	0.656453	0.944198	0.829268	1.15244	1.11152	1.50713	0.928916	0.900811	0.969267	nucleus	K11513			GO:0006323 DNA packaging; GO:0006325 chromatin organization; GO:0006333 chromatin assembly or disassembly; GO:0006334 nucleosome assembly; GO:0006336 DNA replication-independent nucleosome assembly; GO:0006338 chromatin remodeling; GO:0006996 organelle organization; GO:0007275 multicellular organism development; GO:0009790 embryo development; GO:0009792 embryo development ending in birth or egg h…	GO:0000775 chromosome, centromeric region; GO:0000776 kinetochore; GO:0000777 condensed chromosome kinetochore; GO:0000779 condensed chromosome, centromeric region; GO:0000793 condensed chromosome; GO:0005622 intracellular; GO:0005623 cell; GO:0005634 nucleus; GO:0005654 nucleoplasm; GO:0005694 chromosome; GO:0005737 cytoplasm; GO:0005815 microtubule organizing center; GO:0005829 cytosol; GO:0005…
Q8NFQ8	Torsin-1A-interacting protein 2 OS=Homo sapiens OX=9606 GN=TOR1AIP2 PE=1 SV=1	TOR1AIP2	1.525	0.0123912	Up	51.263	32.3	11	10	10	8	7	7	8	6	8	6	6	5	0.706377	0.813365	0.692027	0.947645	1.21768	1.20762	1.15291	1.09576	1.16662	cytoplasm	K23001			GO:0006996 organelle organization; GO:0007029 endoplasmic reticulum organization; GO:0008104 protein localization; GO:0009987 cellular process; GO:0010256 endomembrane system organization; GO:0016043 cellular component organization; GO:0032781 positive regulation of ATPase activity; GO:0033036 macromolecule localization; GO:0033365 protein localization to organelle; GO:0034504 protein localizatio…	GO:0005622 intracellular; GO:0005623 cell; GO:0005634 nucleus; GO:0005635 nuclear envelope; GO:0005737 cytoplasm; GO:0005783 endoplasmic reticulum; GO:0005789 endoplasmic reticulum membrane; GO:0012505 endomembrane system; GO:0016020 membrane; GO:0031090 organelle membrane; GO:0031965 nuclear membrane; GO:0031967 organelle envelope; GO:0031975 envelope; GO:0031984 organelle subcompartment; GO:004…	GO:0001671 ATPase activator activity; GO:0005488 binding; GO:0005515 protein binding; GO:0008047 enzyme activator activity; GO:0019899 enzyme binding; GO:0030234 enzyme regulator activity; GO:0051117 ATPase binding; GO:0060589 nucleoside-triphosphatase regulator activity; GO:0060590 ATPase regulator activity; GO:0098772 molecular function regulator;
Q9NZC3	Glycerophosphodiester phosphodiesterase 1 OS=Homo sapiens OX=9606 GN=GDE1 PE=1 SV=1	GDE1	2.141	0.0357814	Up	37.718	7.6	2	2	2	1	2	2	2	1	2	2	1	1		0.547714	0.721396	1.27954		1.43738	1.01398			endoplasmic reticulum	K19179			GO:0006066 alcohol metabolic process; GO:0006576 cellular biogenic amine metabolic process; GO:0006629 lipid metabolic process; GO:0006644 phospholipid metabolic process; GO:0006650 glycerophospholipid metabolic process; GO:0006793 phosphorus metabolic process; GO:0006796 phosphate-containing compound metabolic process; GO:0006807 nitrogen compound metabolic process; GO:0007154 cell communication…	GO:0005623 cell; GO:0005886 plasma membrane; GO:0005887 integral component of plasma membrane; GO:0016020 membrane; GO:0016021 integral component of membrane; GO:0031224 intrinsic component of membrane; GO:0031226 intrinsic component of plasma membrane; GO:0071944 cell periphery;	GO:0003824 catalytic activity; GO:0004620 phospholipase activity; GO:0004622 lysophospholipase activity; GO:0008081 phosphoric diester hydrolase activity; GO:0008889 glycerophosphodiester phosphodiesterase activity; GO:0016298 lipase activity; GO:0016787 hydrolase activity; GO:0016788 hydrolase activity, acting on ester bonds; GO:0042578 phosphoric ester hydrolase activity; GO:0047395 glycerophos…			C	KOG2258	Glycerophosphoryl diester phosphodiesterase
	LN1=DHT 5nM treated group
	LN2=DHT 5nM + ARV-110 5 uM treated group
	LN3=DHT 5nM + Z15 5 uM treated group

## Sheet: Figure 2-figure supplement 2B
Protein accession	Protein description	Gene name	LN3/LN1 Ratio	LN3/LN1 P value	Regulated Type	MW [kDa]	Coverage [%]	Peptides	Unique peptides	Razor + unique peptides	Razor + unique peptides LN1_1	Razor + unique peptides LN1_2	Razor + unique peptides LN1_3	Razor + unique peptides LN2_1	Razor + unique peptides LN2_2	Razor + unique peptides LN2_3	Razor + unique peptides LN3_1	Razor + unique peptides LN3_2	Razor + unique peptides LN3_3	LN1_1	LN1_2	LN1_3	LN2_1	LN2_2	LN2_3	LN3_1	LN3_2	LN3_3	Subcellular localization	KEGG KO No.	KEGG Gene	KEGG pathway	Biological Process	Cellular Component	Molecular Function	Pfam ID	Domain description	KOG category	KOG NO.	KOG description
A0A096LP01	Small integral membrane protein 26 OS=Homo sapiens OX=9606 GN=SMIM26 PE=3 SV=1	SMIM26	0.417	0.00232644	Down	10.908	25.3	2	2	2	2	2	2	2	0	2	2	0	2	1.17159	1.43392	1.17528	1.16682		1.00007	0.543282		0.509037	mitochondria
O00488	Zinc finger protein 593 OS=Homo sapiens OX=9606 GN=ZNF593 PE=1 SV=2	ZNF593	0.494	0.0108695	Down	15.199	32.1	3	3	3	2	3	3	2	2	1	2	1	2	1.18234	1.51833	1.3591	0.712703	0.889312		0.742534		0.595683	nucleus	K14821			GO:0000054 ribosomal subunit export from nucleus; GO:0000055 ribosomal large subunit export from nucleus; GO:0006355 regulation of transcription, DNA-templated; GO:0006357 regulation of transcription by RNA polymerase II; GO:0006403 RNA localization; GO:0006405 RNA export from nucleus; GO:0006611 protein export from nucleus; GO:0006810 transport; GO:0006886 intracellular protein transport; GO:000…	GO:0005622 intracellular; GO:0005623 cell; GO:0005634 nucleus; GO:0005730 nucleolus; GO:0030684 preribosome; GO:0030687 preribosome, large subunit precursor; GO:0031974 membrane-enclosed lumen; GO:0031981 nuclear lumen; GO:0032991 protein-containing complex; GO:0043226 organelle; GO:0043227 membrane-bounded organelle; GO:0043228 non-membrane-bounded organelle; GO:0043229 intracellular organelle; …	GO:0000981 DNA-binding transcription factor activity, RNA polymerase II-specific; GO:0003700 DNA-binding transcription factor activity; GO:0005488 binding; GO:0008270 zinc ion binding; GO:0043021 ribonucleoprotein complex binding; GO:0043023 ribosomal large subunit binding; GO:0043167 ion binding; GO:0043169 cation binding; GO:0044877 protein-containing complex binding; GO:0046872 metal ion bindi…			K	KOG3408	U1-like Zn-finger-containing protein, probabl erole in RNA processing/splicing
O00762	Ubiquitin-conjugating enzyme E2 C OS=Homo sapiens OX=9606 GN=UBE2C PE=1 SV=1	UBE2C	0.619	0.0308965	Down	19.652	41.3	6	6	6	6	5	4	4	5	5	5	5	5	1.41991	1.36068	0.973398	0.794753	0.897055	1.2295	0.669778	0.766637	0.888286	cytoplasm	K06688	UBE2C; ubiquitin-conjugating enzyme E2 C [EC:2.3.2.23]	hsa04120 Ubiquitin mediated proteolysis	GO:0000209 protein polyubiquitination; GO:0000278 mitotic cell cycle; GO:0000280 nuclear division; GO:0006464 cellular protein modification process; GO:0006508 proteolysis; GO:0006511 ubiquitin-dependent protein catabolic process; GO:0006807 nitrogen compound metabolic process; GO:0006996 organelle organization; GO:0007049 cell cycle; GO:0007088 regulation of mitotic nuclear division; GO:0007096 …	GO:0000151 ubiquitin ligase complex; GO:0000152 nuclear ubiquitin ligase complex; GO:0005622 intracellular; GO:0005623 cell; GO:0005634 nucleus; GO:0005654 nucleoplasm; GO:0005680 anaphase-promoting complex; GO:0005737 cytoplasm; GO:0005829 cytosol; GO:0005886 plasma membrane; GO:0016020 membrane; GO:0031461 cullin-RING ubiquitin ligase complex; GO:0031974 membrane-enclosed lumen; GO:0031981 nucl…	GO:0003824 catalytic activity; GO:0004842 ubiquitin-protein transferase activity; GO:0005488 binding; GO:0005515 protein binding; GO:0016740 transferase activity; GO:0019787 ubiquitin-like protein transferase activity; GO:0019899 enzyme binding; GO:0031625 ubiquitin protein ligase binding; GO:0044389 ubiquitin-like protein ligase binding; GO:0061630 ubiquitin protein ligase activity; GO:0061631 u…	PF00179	Ubiquitin-conjugating enzyme	O	KOG0421	Ubiquitin-protein ligase
O14757	Serine/threonine-protein kinase Chk1 OS=Homo sapiens OX=9606 GN=CHEK1 PE=1 SV=2	CHEK1	0.567	0.000388115	Down	54.433	11.3	4	4	4	4	4	4	4	4	4	4	2	2	1.25859	1.29856	1.24595	1.01282	0.912562	1.11596	0.706024	0.662469	0.787071	cytoplasm	K02216	CHEK1; serine/threonine-protein kinase CHEK1 [EC:2.7.11.1]	hsa04110 Cell cycle; hsa04115 p53 signaling pathway; hsa04218 Cellular senescence; hsa05170 Human immunodeficiency virus 1 infection; hsa05203 Viral carcinogenesis; hsa05166 Human T-cell leukemia virus 1 infection	GO:0000018 regulation of DNA recombination; GO:0000075 cell cycle checkpoint; GO:0000077 DNA damage checkpoint; GO:0000086 G2/M transition of mitotic cell cycle; GO:0000278 mitotic cell cycle; GO:0001701 in utero embryonic development; GO:0001824 blastocyst development; GO:0001832 blastocyst growth; GO:0001833 inner cell mass cell proliferation; GO:0006139 nucleobase-containing compound metabolic…	GO:0000228 nuclear chromosome; GO:0000785 chromatin; GO:0000793 condensed chromosome; GO:0000794 condensed nuclear chromosome; GO:0005622 intracellular; GO:0005623 cell; GO:0005634 nucleus; GO:0005654 nucleoplasm; GO:0005657 replication fork; GO:0005694 chromosome; GO:0005737 cytoplasm; GO:0005813 centrosome; GO:0005815 microtubule organizing center; GO:0005829 cytosol; GO:0005856 cytoskeleton; G…	GO:0003824 catalytic activity; GO:0004672 protein kinase activity; GO:0004674 protein serine/threonine kinase activity; GO:0005488 binding; GO:0005515 protein binding; GO:0016301 kinase activity; GO:0016740 transferase activity; GO:0016772 transferase activity, transferring phosphorus-containing groups; GO:0016773 phosphotransferase activity, alcohol group as acceptor; GO:0019904 protein domain s…	PF00069	Protein kinase domain	D	KOG0590	Checkpoint kinase and related serine/threonine protein kinases
O14965	Aurora kinase A OS=Homo sapiens OX=9606 GN=AURKA PE=1 SV=2	AURKA	0.583	0.0414396	Down	45.809	14.6	5	4	4	4	4	3	3	1	2	2	3	3	1.48329	1.44646	1.1718	0.75239		0.755603	0.546565	0.900047	0.943849	cytoplasm	K11481	AURKA; aurora kinase A [EC:2.7.11.1]	hsa04914 Progesterone-mediated oocyte maturation; hsa04114 Oocyte meiosis	GO:0000003 reproduction; GO:0000075 cell cycle checkpoint; GO:0000077 DNA damage checkpoint; GO:0000086 G2/M transition of mitotic cell cycle; GO:0000212 meiotic spindle organization; GO:0000226 microtubule cytoskeleton organization; GO:0000278 mitotic cell cycle; GO:0000280 nuclear division; GO:0000902 cell morphogenesis; GO:0001889 liver development; GO:0003002 regionalization; GO:0006325 chrom…	GO:0000228 nuclear chromosome; GO:0000775 chromosome, centromeric region; GO:0000779 condensed chromosome, centromeric region; GO:0000780 condensed nuclear chromosome, centromeric region; GO:0000793 condensed chromosome; GO:0000794 condensed nuclear chromosome; GO:0000922 spindle pole; GO:0001674 female germ cell nucleus; GO:0005622 intracellular; GO:0005623 cell; GO:0005634 nucleus; GO:0005654 n…	GO:0003824 catalytic activity; GO:0004672 protein kinase activity; GO:0004674 protein serine/threonine kinase activity; GO:0004712 protein serine/threonine/tyrosine kinase activity; GO:0005488 binding; GO:0005515 protein binding; GO:0016301 kinase activity; GO:0016740 transferase activity; GO:0016772 transferase activity, transferring phosphorus-containing groups; GO:0016773 phosphotransferase ac…	PF00069	Protein kinase domain	D	KOG0580	Serine/threonine protein kinase
O15270	Serine palmitoyltransferase 2 OS=Homo sapiens OX=9606 GN=SPTLC2 PE=1 SV=1	SPTLC2	0.557	0.00198374	Down	62.924	14.4	5	5	5	3	4	3	2	3	3	4	3	3	1.29176	1.52955	1.2558	0.991216	0.677248	0.981551	0.822898	0.685961	0.76402	cytoplasm	K00654	SPT; serine palmitoyltransferase [EC:2.3.1.50]	hsa00600 Sphingolipid metabolism; hsa04071 Sphingolipid signaling pathway; hsa01100 Metabolic pathways	GO:0006629 lipid metabolic process; GO:0006643 membrane lipid metabolic process; GO:0006665 sphingolipid metabolic process; GO:0006672 ceramide metabolic process; GO:0006807 nitrogen compound metabolic process; GO:0008152 metabolic process; GO:0008610 lipid biosynthetic process; GO:0009058 biosynthetic process; GO:0009893 positive regulation of metabolic process; GO:0009894 regulation of cataboli…	GO:0002178 palmitoyltransferase complex; GO:0005622 intracellular; GO:0005623 cell; GO:0005737 cytoplasm; GO:0005783 endoplasmic reticulum; GO:0005789 endoplasmic reticulum membrane; GO:0012505 endomembrane system; GO:0016020 membrane; GO:0017059 serine C-palmitoyltransferase complex; GO:0031211 endoplasmic reticulum palmitoyltransferase complex; GO:0031984 organelle subcompartment; GO:0032991 pr…	GO:0003824 catalytic activity; GO:0004758 serine C-palmitoyltransferase activity; GO:0016408 C-acyltransferase activity; GO:0016409 palmitoyltransferase activity; GO:0016454 C-palmitoyltransferase activity; GO:0016740 transferase activity; GO:0016746 transferase activity, transferring acyl groups; GO:0016747 transferase activity, transferring acyl groups other than amino-acyl groups;	PF00155	Aminotransferase class I and II	E	KOG1357	Serine palmitoyltransferase
O15379	Histone deacetylase 3 OS=Homo sapiens OX=9606 GN=HDAC3 PE=1 SV=2	HDAC3	0.623	0.0041401	Down	48.847	16.4	5	4	4	2	2	2	3	3	4	3	3	3	1.23236	1.10223	1.31465	0.930657	1.21339	0.93361	0.847986	0.686634	0.738468	cytoplasm	K11404	HDAC3; histone deacetylase 3 [EC:3.5.1.98]	hsa04613 Neutrophil extracellular trap formation; hsa05203 Viral carcinogenesis; hsa04919 Thyroid hormone signaling pathway; hsa05034 Alcoholism	GO:0000122 negative regulation of transcription by RNA polymerase II; GO:0000226 microtubule cytoskeleton organization; GO:0001817 regulation of cytokine production; GO:0001818 negative regulation of cytokine production; GO:0001932 regulation of protein phosphorylation; GO:0001933 negative regulation of protein phosphorylation; GO:0001934 positive regulation of protein phosphorylation; GO:0006325…	GO:0000118 histone deacetylase complex; GO:0000785 chromatin; GO:0005622 intracellular; GO:0005623 cell; GO:0005634 nucleus; GO:0005654 nucleoplasm; GO:0005694 chromosome; GO:0005737 cytoplasm; GO:0005794 Golgi apparatus; GO:0005819 spindle; GO:0005829 cytosol; GO:0005856 cytoskeleton; GO:0005874 microtubule; GO:0005876 spindle microtubule; GO:0005886 plasma membrane; GO:0012505 endomembrane syst…	GO:0003676 nucleic acid binding; GO:0003677 DNA binding; GO:0003682 chromatin binding; GO:0003712 transcription coregulator activity; GO:0003714 transcription corepressor activity; GO:0003824 catalytic activity; GO:0004407 histone deacetylase activity; GO:0005488 binding; GO:0005515 protein binding; GO:0008134 transcription factor binding; GO:0016787 hydrolase activity; GO:0016810 hydrolase activ…	PF00850	Histone deacetylase domain	B	KOG1342	Histone deacetylase complex, catalytic component RPD3
O15393	Transmembrane protease serine 2 OS=Homo sapiens OX=9606 GN=TMPRSS2 PE=1 SV=3	TMPRSS2	0.571	5.28106e-06	Down	53.859	19.7	7	7	7	6	7	6	7	6	6	6	6	6	1.32519	1.34388	1.36349	0.830259	0.89266	0.94275	0.747521	0.787689	0.766559	plasma membrane	K09633	TMPRSS2; transmembrane protease serine 2 [EC:3.4.21.-]	hsa05215 Prostate cancer; hsa05164 Influenza A; hsa05202 Transcriptional misregulation in cancer; hsa05171 Coronavirus disease - COVID-19	GO:0006508 proteolysis; GO:0006807 nitrogen compound metabolic process; GO:0008152 metabolic process; GO:0010467 gene expression; GO:0016485 protein processing; GO:0016540 protein autoprocessing; GO:0019538 protein metabolic process; GO:0043170 macromolecule metabolic process; GO:0043900 regulation of multi-organism process; GO:0043902 positive regulation of multi-organism process; GO:0043903 reg…	GO:0005623 cell; GO:0005886 plasma membrane; GO:0005887 integral component of plasma membrane; GO:0016020 membrane; GO:0016021 integral component of membrane; GO:0031224 intrinsic component of membrane; GO:0031226 intrinsic component of plasma membrane; GO:0071944 cell periphery;	GO:0003824 catalytic activity; GO:0008233 peptidase activity; GO:0008236 serine-type peptidase activity; GO:0016787 hydrolase activity; GO:0017171 serine hydrolase activity; GO:0070011 peptidase activity, acting on L-amino acid peptides; GO:0140096 catalytic activity, acting on a protein;	PF00089	Trypsin	E	KOG3627	Trypsin
O43663	Protein regulator of cytokinesis 1 OS=Homo sapiens OX=9606 GN=PRC1 PE=1 SV=2	PRC1	0.666	0.00648581	Down	71.606	10	5	5	5	5	2	5	3	4	3	3	3	3	1.30724	1.06694	1.26103	0.791563	1.14659	1.00406	0.82565	0.737366	0.859563	nucleus	K16732			GO:0000022 mitotic spindle elongation; GO:0000070 mitotic sister chromatid segregation; GO:0000226 microtubule cytoskeleton organization; GO:0000278 mitotic cell cycle; GO:0000280 nuclear division; GO:0000819 sister chromatid segregation; GO:0006996 organelle organization; GO:0007010 cytoskeleton organization; GO:0007017 microtubule-based process; GO:0007049 cell cycle; GO:0007051 spindle organiz…	GO:0005622 intracellular; GO:0005623 cell; GO:0005634 nucleus; GO:0005737 cytoplasm; GO:0005819 spindle; GO:0005829 cytosol; GO:0005856 cytoskeleton; GO:0005874 microtubule; GO:0005876 spindle microtubule; GO:0015630 microtubule cytoskeleton; GO:0030496 midbody; GO:0043226 organelle; GO:0043227 membrane-bounded organelle; GO:0043228 non-membrane-bounded organelle; GO:0043229 intracellular organel…	GO:0005488 binding; GO:0005515 protein binding; GO:0008092 cytoskeletal protein binding; GO:0019894 kinesin binding; GO:0019899 enzyme binding; GO:0019900 kinase binding; GO:0019901 protein kinase binding; GO:0042802 identical protein binding;			Z	KOG4302	Microtubule-associated protein essential for anaphase spindle elongation
O60427	Acyl-CoA (8-3)-desaturase OS=Homo sapiens OX=9606 GN=FADS1 PE=1 SV=3	FADS1	0.635	0.0295117	Down	51.964	23.6	7	7	7	6	7	4	6	5	4	4	4	3	1.03047	1.57671	1.18792	1.13155	0.806418	0.856478	0.754599	0.874679	0.781179	plasma membrane	K10224	FADS1; acyl-CoA (8-3)-desaturase (Delta-5 desaturase) [EC:1.14.19.44]	hsa01040 Biosynthesis of unsaturated fatty acids; hsa01212 Fatty acid metabolism; hsa01100 Metabolic pathways	GO:0001676 long-chain fatty acid metabolic process; GO:0006082 organic acid metabolic process; GO:0006355 regulation of transcription, DNA-templated; GO:0006629 lipid metabolic process; GO:0006631 fatty acid metabolic process; GO:0006633 fatty acid biosynthetic process; GO:0006636 unsaturated fatty acid biosynthetic process; GO:0006644 phospholipid metabolic process; GO:0006690 icosanoid metaboli…	GO:0005622 intracellular; GO:0005623 cell; GO:0005634 nucleus; GO:0005737 cytoplasm; GO:0005783 endoplasmic reticulum; GO:0005789 endoplasmic reticulum membrane; GO:0012505 endomembrane system; GO:0016020 membrane; GO:0016021 integral component of membrane; GO:0031224 intrinsic component of membrane; GO:0031984 organelle subcompartment; GO:0042175 nuclear outer membrane-endoplasmic reticulum memb…	GO:0000248 C-5 sterol desaturase activity; GO:0003824 catalytic activity; GO:0016213 linoleoyl-CoA desaturase activity; GO:0016215 acyl-CoA desaturase activity; GO:0016491 oxidoreductase activity; GO:0016705 oxidoreductase activity, acting on paired donors, with incorporation or reduction of molecular oxygen; GO:0016717 oxidoreductase activity, acting on paired donors, with oxidation of a pair of…	PF00173; PF00487	Cytochrome b5-like Heme/Steroid binding domain; Fatty acid desaturase	I	KOG4232	Delta 6-fatty acid desaturase/delta-8 sphingolipid desaturase
O95070	Protein YIF1A OS=Homo sapiens OX=9606 GN=YIF1A PE=1 SV=2	YIF1A	0.551	0.0322174	Down	32.011	19.8	4	4	4	4	4	4	3	3	4	3	3	3	1.15382	1.54555	0.868237	1.32038	0.976003	1.17037	0.608032	0.619053	0.738559	plasma membrane	K20362			GO:0006810 transport; GO:0006888 endoplasmic reticulum to Golgi vesicle-mediated transport; GO:0006950 response to stress; GO:0006986 response to unfolded protein; GO:0007154 cell communication; GO:0007165 signal transduction; GO:0009987 cellular process; GO:0010033 response to organic substance; GO:0016192 vesicle-mediated transport; GO:0023052 signaling; GO:0030968 endoplasmic reticulum unfolde…	GO:0000139 Golgi membrane; GO:0005622 intracellular; GO:0005623 cell; GO:0005737 cytoplasm; GO:0005783 endoplasmic reticulum; GO:0005789 endoplasmic reticulum membrane; GO:0005793 endoplasmic reticulum-Golgi intermediate compartment; GO:0005794 Golgi apparatus; GO:0005798 Golgi-associated vesicle; GO:0012505 endomembrane system; GO:0016020 membrane; GO:0016021 integral component of membrane; GO:0…				U	KOG3094	Predicted membrane protein
O95235	Kinesin-like protein KIF20A OS=Homo sapiens OX=9606 GN=KIF20A PE=1 SV=1	KIF20A	0.463	4.52884e-05	Down	100.28	26.6	18	18	18	10	17	14	9	11	11	8	8	5	1.48167	1.47872	1.46988	0.815874	0.790851	0.910472	0.703464	0.630476	0.71859	cytoplasm,nucleus	K10402			GO:0000226 microtubule cytoskeleton organization; GO:0000278 mitotic cell cycle; GO:0000281 mitotic cytokinesis; GO:0000910 cytokinesis; GO:0000920 septum digestion after cytokinesis; GO:0001578 microtubule bundle formation; GO:0006810 transport; GO:0006928 movement of cell or subcellular component; GO:0006996 organelle organization; GO:0007010 cytoskeleton organization; GO:0007017 microtubule-ba…	GO:0005576 extracellular region; GO:0005622 intracellular; GO:0005623 cell; GO:0005634 nucleus; GO:0005654 nucleoplasm; GO:0005737 cytoplasm; GO:0005794 Golgi apparatus; GO:0005819 spindle; GO:0005856 cytoskeleton; GO:0005871 kinesin complex; GO:0005875 microtubule associated complex; GO:0005886 plasma membrane; GO:0012505 endomembrane system; GO:0015630 microtubule cytoskeleton; GO:0016020 membr…	GO:0003774 motor activity; GO:0003777 microtubule motor activity; GO:0003824 catalytic activity; GO:0005215 transporter activity; GO:0005488 binding; GO:0005515 protein binding; GO:0016462 pyrophosphatase activity; GO:0016787 hydrolase activity; GO:0016817 hydrolase activity, acting on acid anhydrides; GO:0016818 hydrolase activity, acting on acid anhydrides, in phosphorus-containing anhydrides; …	PF00225	Kinesin motor domain	Z	KOG0247	Kinesin-like protein
O95297	Myelin protein zero-like protein 1 OS=Homo sapiens OX=9606 GN=MPZL1 PE=1 SV=1	MPZL1	0.661	0.00102064	Down	29.082	27.1	5	5	5	4	5	5	4	4	4	5	3	5	1.2433	1.20051	1.22179	0.903667	0.980658	1.02665	0.780055	0.758323	0.88505	plasma membrane	K06770	MPZ; myelin protein zero	hsa04514 Cell adhesion molecules	GO:0007154 cell communication; GO:0007165 signal transduction; GO:0007166 cell surface receptor signaling pathway; GO:0007167 enzyme linked receptor protein signaling pathway; GO:0007169 transmembrane receptor protein tyrosine kinase signaling pathway; GO:0007267 cell-cell signaling; GO:0009987 cellular process; GO:0023052 signaling; GO:0050789 regulation of biological process; GO:0050794 regulat…	GO:0005623 cell; GO:0005886 plasma membrane; GO:0005887 integral component of plasma membrane; GO:0016020 membrane; GO:0016021 integral component of membrane; GO:0031224 intrinsic component of membrane; GO:0031226 intrinsic component of plasma membrane; GO:0071944 cell periphery;	GO:0005198 structural molecule activity;	PF07686	Immunoglobulin V-set domain
O95864	Acyl-CoA 6-desaturase OS=Homo sapiens OX=9606 GN=FADS2 PE=1 SV=1	FADS2	0.479	5.1824e-06	Down	52.259	27.3	12	12	12	11	10	10	10	11	11	10	10	9	1.3639	1.35145	1.28336	1.00888	1.04881	1.02929	0.643889	0.622885	0.647541	plasma membrane	K10226	FADS2; acyl-CoA 6-desaturase (Delta-6 desaturase) [EC:1.14.19.3]	hsa00592 alpha-Linolenic acid metabolism; hsa03320 PPAR signaling pathway; hsa01040 Biosynthesis of unsaturated fatty acids; hsa01212 Fatty acid metabolism; hsa01100 Metabolic pathways	GO:0000038 very long-chain fatty acid metabolic process; GO:0001676 long-chain fatty acid metabolic process; GO:0006082 organic acid metabolic process; GO:0006629 lipid metabolic process; GO:0006631 fatty acid metabolic process; GO:0006633 fatty acid biosynthetic process; GO:0006636 unsaturated fatty acid biosynthetic process; GO:0008152 metabolic process; GO:0008610 lipid biosynthetic process; G…	GO:0005622 intracellular; GO:0005623 cell; GO:0005737 cytoplasm; GO:0005783 endoplasmic reticulum; GO:0005789 endoplasmic reticulum membrane; GO:0005886 plasma membrane; GO:0005887 integral component of plasma membrane; GO:0012505 endomembrane system; GO:0016020 membrane; GO:0016021 integral component of membrane; GO:0031224 intrinsic component of membrane; GO:0031226 intrinsic component of plasm…	GO:0003824 catalytic activity; GO:0004768 stearoyl-CoA 9-desaturase activity; GO:0016213 linoleoyl-CoA desaturase activity; GO:0016215 acyl-CoA desaturase activity; GO:0016491 oxidoreductase activity; GO:0016705 oxidoreductase activity, acting on paired donors, with incorporation or reduction of molecular oxygen; GO:0016717 oxidoreductase activity, acting on paired donors, with oxidation of a pai…	PF00173; PF00487	Cytochrome b5-like Heme/Steroid binding domain; Fatty acid desaturase	I	KOG4232	Delta 6-fatty acid desaturase/delta-8 sphingolipid desaturase
P07288	Prostate-specific antigen OS=Homo sapiens OX=9606 GN=KLK3 PE=1 SV=2	KLK3	0.435	9.15589e-06	Down	28.741	58.2	8	8	8	8	7	8	7	7	7	6	5	6	1.50031	1.4379	1.54386	0.8581	0.879157	0.831074	0.677109	0.637946	0.634547	extracellular	K01351	KLK3; semenogelase [EC:3.4.21.77]	hsa05215 Prostate cancer; hsa05200 Pathways in cancer	GO:0002376 immune system process; GO:0002440 production of molecular mediator of immune response; GO:0002775 antimicrobial peptide production; GO:0002778 antibacterial peptide production; GO:0006508 proteolysis; GO:0006807 nitrogen compound metabolic process; GO:0006950 response to stress; GO:0006952 defense response; GO:0006955 immune response; GO:0006959 humoral immune response; GO:0008152 meta…	GO:0005576 extracellular region; GO:0005615 extracellular space; GO:0032991 protein-containing complex;	GO:0003824 catalytic activity; GO:0004175 endopeptidase activity; GO:0004252 serine-type endopeptidase activity; GO:0008233 peptidase activity; GO:0008236 serine-type peptidase activity; GO:0016787 hydrolase activity; GO:0016810 hydrolase activity, acting on carbon-nitrogen (but not peptide) bonds; GO:0016811 hydrolase activity, acting on carbon-nitrogen (but not peptide) bonds, in linear amides;…	PF00089	Trypsin	O	KOG3627	Trypsin
P07948	Tyrosine-protein kinase Lyn OS=Homo sapiens OX=9606 GN=LYN PE=1 SV=3	LYN	0.615	0.013084	Down	58.573	14.5	6	5	5	4	4	4	2	3	4	3	5	4	1.24516	1.44613	1.15799	0.878288	0.822682	1.08301	0.677446	0.935788	0.753511	cytoplasm,nucleus	K05854	LYN; tyrosine-protein kinase Lyn [EC:2.7.10.2]	hsa05120 Epithelial cell signaling in Helicobacter pylori infection; hsa04666 Fc gamma R-mediated phagocytosis; hsa04062 Chemokine signaling pathway; hsa04664 Fc epsilon RI signaling pathway; hsa04662 B cell receptor signaling pathway; hsa05203 Viral carcinogenesis; hsa05169 Epstein-Barr virus infection; hsa04730 Long-term depression; hsa04064 NF-kappa B signaling pathway; hsa05167 Kaposi sarcoma…	GO:0001101 response to acid chemical; GO:0001775 cell activation; GO:0001776 leukocyte homeostasis; GO:0001782 B cell homeostasis; GO:0001817 regulation of cytokine production; GO:0001932 regulation of protein phosphorylation; GO:0001933 negative regulation of protein phosphorylation; GO:0001934 positive regulation of protein phosphorylation; GO:0002218 activation of innate immune response; GO:00…	GO:0005622 intracellular; GO:0005623 cell; GO:0005634 nucleus; GO:0005737 cytoplasm; GO:0005794 Golgi apparatus; GO:0005829 cytosol; GO:0005886 plasma membrane; GO:0009898 cytoplasmic side of plasma membrane; GO:0012505 endomembrane system; GO:0016020 membrane; GO:0019897 extrinsic component of plasma membrane; GO:0019898 extrinsic component of membrane; GO:0031234 extrinsic component of cytoplas…	GO:0003824 catalytic activity; GO:0004672 protein kinase activity; GO:0004713 protein tyrosine kinase activity; GO:0004715 non-membrane spanning protein tyrosine kinase activity; GO:0005102 signaling receptor binding; GO:0005488 binding; GO:0005515 protein binding; GO:0016301 kinase activity; GO:0016740 transferase activity; GO:0016772 transferase activity, transferring phosphorus-containing grou…	PF00018; PF00017; PF07714	SH3 domain; SH2 domain; Protein tyrosine kinase	T	KOG0197	Tyrosine kinases
P10275	Androgen receptor OS=Homo sapiens OX=9606 GN=AR PE=1 SV=3	AR	0.368	2.06721e-06	Down	99.187	20.7	13	13	13	11	10	11	5	3	6	7	8	8	1.83927	1.92893	1.95195	0.386869	0.391948	0.396525	0.679154	0.712578	0.712768	nucleus	K08557	AR; androgen receptor	hsa05215 Prostate cancer; hsa05200 Pathways in cancer; hsa05207 Chemical carcinogenesis - receptor activation; hsa04114 Oocyte meiosis	GO:0000003 reproduction; GO:0000122 negative regulation of transcription by RNA polymerase II; GO:0001655 urogenital system development; GO:0003006 developmental process involved in reproduction; GO:0006139 nucleobase-containing compound metabolic process; GO:0006351 transcription, DNA-templated; GO:0006352 DNA-templated transcription, initiation; GO:0006355 regulation of transcription, DNA-templ…	GO:0000228 nuclear chromosome; GO:0000785 chromatin; GO:0000790 nuclear chromatin; GO:0005622 intracellular; GO:0005623 cell; GO:0005634 nucleus; GO:0005654 nucleoplasm; GO:0005694 chromosome; GO:0005737 cytoplasm; GO:0005829 cytosol; GO:0016604 nuclear body; GO:0016607 nuclear speck; GO:0031974 membrane-enclosed lumen; GO:0031981 nuclear lumen; GO:0032991 protein-containing complex; GO:0043226 o…	GO:0000976 transcription regulatory region sequence-specific DNA binding; GO:0000977 RNA polymerase II transcription regulatory region sequence-specific DNA binding; GO:0000978 RNA polymerase II cis-regulatory region sequence-specific DNA binding; GO:0000981 DNA-binding transcription factor activity, RNA polymerase II-specific; GO:0000987 cis-regulatory region sequence-specific DNA binding; GO:00…	PF00105; PF00104	Zinc finger, C4 type (two domains); Ligand-binding domain of nuclear hormone receptor	K	KOG3575	FOG: Hormone receptors
P15104	Glutamine synthetase OS=Homo sapiens OX=9606 GN=GLUL PE=1 SV=4	GLUL	0.629	3.0137e-05	Down	42.064	22	7	7	7	7	6	7	6	4	5	7	6	6	1.20345	1.25186	1.21144	0.963457	0.992711	1.07046	0.742917	0.772479	0.791215	cytoplasm	K01915	glnA; glutamine synthetase [EC:6.3.1.2]	hsa04724 Glutamatergic synapse; hsa00630 Glyoxylate and dicarboxylate metabolism; hsa04727 GABAergic synapse; hsa00910 Nitrogen metabolism; hsa00250 Alanine, aspartate and glutamate metabolism; hsa00220 Arginine biosynthesis; hsa04217 Necroptosis; hsa01230 Biosynthesis of amino acids; hsa01100 Metabolic pathways	GO:0001504 neurotransmitter uptake; GO:0001505 regulation of neurotransmitter levels; GO:0002791 regulation of peptide secretion; GO:0002793 positive regulation of peptide secretion; GO:0006082 organic acid metabolic process; GO:0006520 cellular amino acid metabolic process; GO:0006536 glutamate metabolic process; GO:0006538 glutamate catabolic process; GO:0006541 glutamine metabolic process; GO:…	GO:0005622 intracellular; GO:0005623 cell; GO:0005737 cytoplasm; GO:0005739 mitochondrion; GO:0005783 endoplasmic reticulum; GO:0005791 rough endoplasmic reticulum; GO:0005829 cytosol; GO:0012505 endomembrane system; GO:0030424 axon; GO:0032991 protein-containing complex; GO:0036477 somatodendritic compartment; GO:0042995 cell projection; GO:0043005 neuron projection; GO:0043025 neuronal cell bod…	GO:0000166 nucleotide binding; GO:0000287 magnesium ion binding; GO:0003824 catalytic activity; GO:0004356 glutamate-ammonia ligase activity; GO:0005488 binding; GO:0005515 protein binding; GO:0005524 ATP binding; GO:0008144 drug binding; GO:0016211 ammonia ligase activity; GO:0016595 glutamate binding; GO:0016597 amino acid binding; GO:0016874 ligase activity; GO:0016879 ligase activity, forming…	PF03951; PF00120	Glutamine synthetase, beta-Grasp domain; Glutamine synthetase, catalytic domain	E	KOG0683	Glutamine synthetase
P18440	Arylamine N-acetyltransferase 1 OS=Homo sapiens OX=9606 GN=NAT1 PE=1 SV=2	NAT1	0.548	0.00839538	Down	33.898	23.4	6	6	6	4	4	6	5	5	4	5	4	3	1.37553	1.25997	1.58708	0.789784	0.83534	0.83997	0.835569	0.859804	0.616955	cytoplasm	K00622	nat; arylamine N-acetyltransferase [EC:2.3.1.5]	hsa00232 Caffeine metabolism; hsa05204 Chemical carcinogenesis - DNA adducts; hsa00983 Drug metabolism - other enzymes; hsa01100 Metabolic pathways	GO:0001666 response to hypoxia; GO:0002237 response to molecule of bacterial origin; GO:0003333 amino acid transmembrane transport; GO:0006805 xenobiotic metabolic process; GO:0006810 transport; GO:0006811 ion transport; GO:0006820 anion transport; GO:0006865 amino acid transport; GO:0006950 response to stress; GO:0007275 multicellular organism development; GO:0008152 metabolic process; GO:000941…	GO:0005622 intracellular; GO:0005623 cell; GO:0005737 cytoplasm; GO:0005829 cytosol; GO:0005886 plasma membrane; GO:0016020 membrane; GO:0071944 cell periphery;	GO:0003824 catalytic activity; GO:0004060 arylamine N-acetyltransferase activity; GO:0005215 transporter activity; GO:0005342 organic acid transmembrane transporter activity; GO:0008080 N-acetyltransferase activity; GO:0008509 anion transmembrane transporter activity; GO:0008514 organic anion transmembrane transporter activity; GO:0015075 ion transmembrane transporter activity; GO:0015171 amino a…
P31350	Ribonucleoside-diphosphate reductase subunit M2 OS=Homo sapiens OX=9606 GN=RRM2 PE=1 SV=1	RRM2	0.528	1.3336e-06	Down	44.877	52.4	16	14	16	16	16	16	15	15	16	15	16	14	1.36368	1.40252	1.37503	0.908651	0.870594	0.894686	0.712635	0.732689	0.739515	cytoplasm	K10808	RRM2; ribonucleoside-diphosphate reductase subunit M2 [EC:1.17.4.1]	hsa00983 Drug metabolism - other enzymes; hsa00480 Glutathione metabolism; hsa00240 Pyrimidine metabolism; hsa04115 p53 signaling pathway; hsa00230 Purine metabolism; hsa01100 Metabolic pathways	GO:0000082 G1/S transition of mitotic cell cycle; GO:0000083 regulation of transcription involved in G1/S transition of mitotic cell cycle; GO:0000278 mitotic cell cycle; GO:0006139 nucleobase-containing compound metabolic process; GO:0006355 regulation of transcription, DNA-templated; GO:0006725 cellular aromatic compound metabolic process; GO:0006753 nucleoside phosphate metabolic process; GO:0…	GO:0005622 intracellular; GO:0005623 cell; GO:0005737 cytoplasm; GO:0005829 cytosol; GO:0005971 ribonucleoside-diphosphate reductase complex; GO:0032991 protein-containing complex; GO:1902494 catalytic complex; GO:1990204 oxidoreductase complex;	GO:0003824 catalytic activity; GO:0004748 ribonucleoside-diphosphate reductase activity, thioredoxin disulfide as acceptor; GO:0016491 oxidoreductase activity; GO:0016725 oxidoreductase activity, acting on CH or CH2 groups; GO:0016728 oxidoreductase activity, acting on CH or CH2 groups, disulfide as acceptor; GO:0061731 ribonucleoside-diphosphate reductase activity;	PF00268	Ribonucleotide reductase, small chain	F	KOG1567	Ribonucleotide reductase, beta subunit
P36873	Serine/threonine-protein phosphatase PP1-gamma catalytic subunit OS=Homo sapiens OX=9606 GN=PPP1CC PE=1 SV=1	PPP1CC	0.48	0.0092471	Down	36.983	47.7	16	2	2	2	2	2	2	2	2	2	2	2	1.52618	0.949716	1.35069	1.46534	1.26623	0.604121	0.604658	0.558833	0.674234	cytoplasm	K06269	PPP1C; serine/threonine-protein phosphatase PP1 catalytic subunit [EC:3.1.3.16]	hsa04510 Focal adhesion; hsa04270 Vascular smooth muscle contraction; hsa04921 Oxytocin signaling pathway; hsa05415 Diabetic cardiomyopathy; hsa04261 Adrenergic signaling in cardiomyocytes; hsa05168 Herpes simplex virus 1 infection; hsa04720 Long-term potentiation; hsa05205 Proteoglycans in cancer; hsa05034 Alcoholism; hsa04931 Insulin resistance; hsa04750 Inflammatory mediator regulation of TRP …	GO:0006464 cellular protein modification process; GO:0006470 protein dephosphorylation; GO:0006793 phosphorus metabolic process; GO:0006796 phosphate-containing compound metabolic process; GO:0006807 nitrogen compound metabolic process; GO:0007275 multicellular organism development; GO:0007399 nervous system development; GO:0007623 circadian rhythm; GO:0008152 metabolic process; GO:0008284 positi…	GO:0005622 intracellular; GO:0005623 cell; GO:0005737 cytoplasm; GO:0005739 mitochondrion; GO:0005740 mitochondrial envelope; GO:0005741 mitochondrial outer membrane; GO:0008287 protein serine/threonine phosphatase complex; GO:0016020 membrane; GO:0019867 outer membrane; GO:0030425 dendrite; GO:0031090 organelle membrane; GO:0031966 mitochondrial membrane; GO:0031967 organelle envelope; GO:003196…	GO:0003824 catalytic activity; GO:0004721 phosphoprotein phosphatase activity; GO:0004722 protein serine/threonine phosphatase activity; GO:0005488 binding; GO:0005515 protein binding; GO:0005521 lamin binding; GO:0008022 protein C-terminus binding; GO:0008157 protein phosphatase 1 binding; GO:0016787 hydrolase activity; GO:0016788 hydrolase activity, acting on ester bonds; GO:0016791 phosphatase…	PF00149	Calcineurin-like phosphoesterase	T	KOG0374	Serine/threonine specific protein phosphatase PP1, catalytic subunit
P36956	Sterol regulatory element-binding protein 1 OS=Homo sapiens OX=9606 GN=SREBF1 PE=1 SV=2	SREBF1	0.649	0.0307342	Down	121.67	6.5	5	5	5	1	4	4	2	1	4	1	2	3		1.33721	1.28436	0.907052		0.769622		0.914894	0.786863	nucleus	K07197	SREBP1; sterol regulatory element-binding transcription factor 1	hsa04936 Alcoholic liver disease; hsa04932 Non-alcoholic fatty liver disease; hsa04910 Insulin signaling pathway; hsa04931 Insulin resistance; hsa04152 AMPK signaling pathway	GO:0000122 negative regulation of transcription by RNA polymerase II; GO:0001101 response to acid chemical; GO:0002027 regulation of heart rate; GO:0002791 regulation of peptide secretion; GO:0002792 negative regulation of peptide secretion; GO:0003062 regulation of heart rate by chemical signal; GO:0006066 alcohol metabolic process; GO:0006139 nucleobase-containing compound metabolic process; GO…	GO:0000139 Golgi membrane; GO:0005622 intracellular; GO:0005623 cell; GO:0005634 nucleus; GO:0005635 nuclear envelope; GO:0005654 nucleoplasm; GO:0005737 cytoplasm; GO:0005783 endoplasmic reticulum; GO:0005789 endoplasmic reticulum membrane; GO:0005794 Golgi apparatus; GO:0005829 cytosol; GO:0012505 endomembrane system; GO:0016020 membrane; GO:0031090 organelle membrane; GO:0031967 organelle enve…	GO:0000976 transcription regulatory region sequence-specific DNA binding; GO:0000977 RNA polymerase II transcription regulatory region sequence-specific DNA binding; GO:0000978 RNA polymerase II cis-regulatory region sequence-specific DNA binding; GO:0000981 DNA-binding transcription factor activity, RNA polymerase II-specific; GO:0000987 cis-regulatory region sequence-specific DNA binding; GO:00…	PF00010	Helix-loop-helix DNA-binding domain	K	KOG2588	Predicted DNA-binding protein
P41567	Eukaryotic translation initiation factor 1 OS=Homo sapiens OX=9606 GN=EIF1 PE=1 SV=1	EIF1	0.639	0.00415382	Down	12.732	77.9	10	3	10	9	8	9	7	8	6	8	7	7	1.46936	1.14852	1.38207	0.879478	0.868228	0.695096	0.842046	0.841769	0.873436	cytoplasm	K03113			GO:0006412 translation; GO:0006413 translational initiation; GO:0006417 regulation of translation; GO:0006446 regulation of translational initiation; GO:0006518 peptide metabolic process; GO:0006807 nitrogen compound metabolic process; GO:0008152 metabolic process; GO:0009058 biosynthetic process; GO:0009059 macromolecule biosynthetic process; GO:0009889 regulation of biosynthetic process; GO:000…	GO:0005622 intracellular; GO:0005623 cell; GO:0005634 nucleus; GO:0005737 cytoplasm; GO:0043226 organelle; GO:0043227 membrane-bounded organelle; GO:0043229 intracellular organelle; GO:0043231 intracellular membrane-bounded organelle;	GO:0003676 nucleic acid binding; GO:0003723 RNA binding; GO:0003743 translation initiation factor activity; GO:0005488 binding; GO:0008135 translation factor activity, RNA binding; GO:0097159 organic cyclic compound binding; GO:1901363 heterocyclic compound binding;	PF01253	Translation initiation factor SUI1	J	KOG1770	Translation initiation factor 1 (eIF-1/SUI1)
P43357	Melanoma-associated antigen 3 OS=Homo sapiens OX=9606 GN=MAGEA3 PE=1 SV=1	MAGEA3	0.555	0.000109872	Down	34.747	18.2	4	3	4	4	4	4	4	4	4	3	3	3	1.24297	1.20482	1.33593	0.967339	1.12866	1.0209	0.668213	0.724216	0.706945	cytoplasm	K24127			GO:0000122 negative regulation of transcription by RNA polymerase II; GO:0006355 regulation of transcription, DNA-templated; GO:0006357 regulation of transcription by RNA polymerase II; GO:0006807 nitrogen compound metabolic process; GO:0006950 response to stress; GO:0007154 cell communication; GO:0007165 signal transduction; GO:0007568 aging; GO:0007569 cell aging; GO:0008152 metabolic process; …	GO:0005622 intracellular; GO:0005623 cell; GO:0005634 nucleus; GO:0005654 nucleoplasm; GO:0005737 cytoplasm; GO:0005783 endoplasmic reticulum; GO:0012505 endomembrane system; GO:0016604 nuclear body; GO:0016605 PML body; GO:0031974 membrane-enclosed lumen; GO:0031981 nuclear lumen; GO:0043226 organelle; GO:0043227 membrane-bounded organelle; GO:0043229 intracellular organelle; GO:0043231 intracel…	GO:0002020 protease binding; GO:0005488 binding; GO:0005515 protein binding; GO:0008134 transcription factor binding; GO:0019899 enzyme binding; GO:0031625 ubiquitin protein ligase binding; GO:0042826 histone deacetylase binding; GO:0044389 ubiquitin-like protein ligase binding; GO:0070491 repressing transcription factor binding; GO:0089720 caspase binding;			S	KOG4562	Uncharacterized conserved protein (tumor-rejection antigen MAGE in humans)
P50579	Methionine aminopeptidase 2 OS=Homo sapiens OX=9606 GN=METAP2 PE=1 SV=1	METAP2	0.535	1.51699e-05	Down	52.891	34.1	12	12	12	12	12	12	10	12	11	9	9	10	1.40923	1.37749	1.30203	0.894679	0.877844	0.953054	0.717214	0.729779	0.738676	cytoplasm	K01265			GO:0006464 cellular protein modification process; GO:0006508 proteolysis; GO:0006807 nitrogen compound metabolic process; GO:0008152 metabolic process; GO:0008277 regulation of G protein-coupled receptor signaling pathway; GO:0009966 regulation of signal transduction; GO:0009987 cellular process; GO:0010467 gene expression; GO:0010646 regulation of cell communication; GO:0016485 protein processin…	GO:0005622 intracellular; GO:0005623 cell; GO:0005737 cytoplasm; GO:0005829 cytosol; GO:0005886 plasma membrane; GO:0016020 membrane; GO:0071944 cell periphery;	GO:0003824 catalytic activity; GO:0004177 aminopeptidase activity; GO:0008233 peptidase activity; GO:0008235 metalloexopeptidase activity; GO:0008237 metallopeptidase activity; GO:0008238 exopeptidase activity; GO:0016787 hydrolase activity; GO:0070011 peptidase activity, acting on L-amino acid peptides; GO:0140096 catalytic activity, acting on a protein;	PF00557	Metallopeptidase family M24	O	KOG2775	Metallopeptidase
P53350	Serine/threonine-protein kinase PLK1 OS=Homo sapiens OX=9606 GN=PLK1 PE=1 SV=1	PLK1	0.636	0.00983387	Down	68.254	18.2	8	8	8	3	7	6	5	4	4	2	4	2	1.06385	1.46128	1.22	0.879088	0.891197	1.10231	0.780618	0.76352	0.838139	cytoplasm	K06631	PLK1; polo-like kinase 1 [EC:2.7.11.21]	hsa04110 Cell cycle; hsa04914 Progesterone-mediated oocyte maturation; hsa04068 FoxO signaling pathway; hsa04114 Oocyte meiosis	GO:0000070 mitotic sister chromatid segregation; GO:0000075 cell cycle checkpoint; GO:0000077 DNA damage checkpoint; GO:0000079 regulation of cyclin-dependent protein serine/threonine kinase activity; GO:0000086 G2/M transition of mitotic cell cycle; GO:0000122 negative regulation of transcription by RNA polymerase II; GO:0000226 microtubule cytoskeleton organization; GO:0000278 mitotic cell cycl…	GO:0000228 nuclear chromosome; GO:0000775 chromosome, centromeric region; GO:0000776 kinetochore; GO:0000777 condensed chromosome kinetochore; GO:0000778 condensed nuclear chromosome kinetochore; GO:0000779 condensed chromosome, centromeric region; GO:0000780 condensed nuclear chromosome, centromeric region; GO:0000793 condensed chromosome; GO:0000794 condensed nuclear chromosome; GO:0000922 spin…	GO:0000166 nucleotide binding; GO:0000287 magnesium ion binding; GO:0003824 catalytic activity; GO:0004672 protein kinase activity; GO:0004674 protein serine/threonine kinase activity; GO:0005488 binding; GO:0005515 protein binding; GO:0005524 ATP binding; GO:0008017 microtubule binding; GO:0008092 cytoskeletal protein binding; GO:0008144 drug binding; GO:0010997 anaphase-promoting complex bindin…	PF00069	Protein kinase domain	D	KOG0575	Polo-like serine/threonine protein kinase
P62487	DNA-directed RNA polymerase II subunit RPB7 OS=Homo sapiens OX=9606 GN=POLR2G PE=1 SV=1	POLR2G	0.636	0.0141372	Down	19.294	52.9	6	6	6	4	4	6	4	4	4	4	3	4	0.965786	1.34194	1.13454	1.44303	1.20805	0.715852	0.751579	0.77784	0.661387	cytoskeleton	K03015	RPB7; DNA-directed RNA polymerase II subunit RPB7	hsa05016 Huntington disease; hsa03020 RNA polymerase	GO:0000291 nuclear-transcribed mRNA catabolic process, exonucleolytic; GO:0000375 RNA splicing, via transesterification reactions; GO:0000377 RNA splicing, via transesterification reactions with bulged adenosine as nucleophile; GO:0000398 mRNA splicing, via spliceosome; GO:0000956 nuclear-transcribed mRNA catabolic process; GO:0006139 nucleobase-containing compound metabolic process; GO:0006259 D…	GO:0000428 DNA-directed RNA polymerase complex; GO:0000932 P-body; GO:0005622 intracellular; GO:0005623 cell; GO:0005634 nucleus; GO:0005654 nucleoplasm; GO:0005665 RNA polymerase II, core complex; GO:0005737 cytoplasm; GO:0016591 RNA polymerase II, holoenzyme; GO:0030880 RNA polymerase complex; GO:0031974 membrane-enclosed lumen; GO:0031981 nuclear lumen; GO:0032991 protein-containing complex; G…	GO:0003676 nucleic acid binding; GO:0003677 DNA binding; GO:0003697 single-stranded DNA binding; GO:0003723 RNA binding; GO:0003727 single-stranded RNA binding; GO:0005488 binding; GO:0005515 protein binding; GO:0031369 translation initiation factor binding; GO:0097159 organic cyclic compound binding; GO:1901363 heterocyclic compound binding;	PF03876; PF00575	SHS2 domain found in N terminus of Rpb7p/Rpc25p/MJ0397; S1 RNA binding domain	K	KOG3298	DNA-directed RNA polymerase subunit E'
P62841	40S ribosomal protein S15 OS=Homo sapiens OX=9606 GN=RPS15 PE=1 SV=2	RPS15	0.654	0.000221163	Down	17.04	41.4	7	7	7	7	7	7	5	6	5	7	6	6	1.20718	1.1674	1.13303	1.2047	1.21154	0.782933	0.788035	0.722246	0.782933	cytoplasm	K02958	RP-S15e; small subunit ribosomal protein S15e	hsa03010 Ribosome; hsa05171 Coronavirus disease - COVID-19	GO:0000028 ribosomal small subunit assembly; GO:0000054 ribosomal subunit export from nucleus; GO:0000056 ribosomal small subunit export from nucleus; GO:0000184 nuclear-transcribed mRNA catabolic process, nonsense-mediated decay; GO:0000956 nuclear-transcribed mRNA catabolic process; GO:0001889 liver development; GO:0006139 nucleobase-containing compound metabolic process; GO:0006364 rRNA proces…	GO:0005622 intracellular; GO:0005623 cell; GO:0005634 nucleus; GO:0005654 nucleoplasm; GO:0005737 cytoplasm; GO:0005783 endoplasmic reticulum; GO:0005789 endoplasmic reticulum membrane; GO:0005791 rough endoplasmic reticulum; GO:0005829 cytosol; GO:0005840 ribosome; GO:0012505 endomembrane system; GO:0015935 small ribosomal subunit; GO:0016020 membrane; GO:0022626 cytosolic ribosome; GO:0022627 c…	GO:0003676 nucleic acid binding; GO:0003677 DNA binding; GO:0003723 RNA binding; GO:0003735 structural constituent of ribosome; GO:0005198 structural molecule activity; GO:0005488 binding; GO:0097159 organic cyclic compound binding; GO:1901363 heterocyclic compound binding;	PF00203	Ribosomal protein S19	J	KOG0898	40S ribosomal protein S15
P98179	RNA-binding protein 3 OS=Homo sapiens OX=9606 GN=RBM3 PE=1 SV=1	RBM3	0.623	0.000655506	Down	17.17	24.2	3	3	3	3	2	2	3	3	3	3	3	3	1.169	1.18834	1.32535	1.03726	1.09791	0.888194	0.769734	0.80063	0.723577	nucleus	K13186			GO:0006139 nucleobase-containing compound metabolic process; GO:0006396 RNA processing; GO:0006412 translation; GO:0006417 regulation of translation; GO:0006518 peptide metabolic process; GO:0006725 cellular aromatic compound metabolic process; GO:0006807 nitrogen compound metabolic process; GO:0006950 response to stress; GO:0008152 metabolic process; GO:0009058 biosynthetic process; GO:0009059 m…	GO:0005622 intracellular; GO:0005623 cell; GO:0005634 nucleus; GO:0005654 nucleoplasm; GO:0005730 nucleolus; GO:0005737 cytoplasm; GO:0030425 dendrite; GO:0031974 membrane-enclosed lumen; GO:0031981 nuclear lumen; GO:0036477 somatodendritic compartment; GO:0042995 cell projection; GO:0043005 neuron projection; GO:0043226 organelle; GO:0043227 membrane-bounded organelle; GO:0043228 non-membrane-bo…	GO:0005488 binding; GO:0043021 ribonucleoprotein complex binding; GO:0043023 ribosomal large subunit binding; GO:0044877 protein-containing complex binding;	PF00076	RNA recognition motif. (a.k.a. RRM, RBD, or RNP domain)	A	KOG0118	FOG: RRM domain
Q01581	Hydroxymethylglutaryl-CoA synthase, cytoplasmic OS=Homo sapiens OX=9606 GN=HMGCS1 PE=1 SV=2	HMGCS1	0.575	0.000427103	Down	57.293	50.6	19	18	19	13	14	13	16	16	16	12	12	12	0.991568	0.952667	1.08165	1.40978	1.38455	1.44096	0.593124	0.539823	0.605868	cytoplasm	K01641	HMGCS; hydroxymethylglutaryl-CoA synthase [EC:2.3.3.10]	hsa00900 Terpenoid backbone biosynthesis; hsa03320 PPAR signaling pathway; hsa00650 Butanoate metabolism; hsa00280 Valine, leucine and isoleucine degradation; hsa01100 Metabolic pathways	GO:0000003 reproduction; GO:0001889 liver development; GO:0003006 developmental process involved in reproduction; GO:0006066 alcohol metabolic process; GO:0006629 lipid metabolic process; GO:0006694 steroid biosynthetic process; GO:0006695 cholesterol biosynthetic process; GO:0007275 multicellular organism development; GO:0007399 nervous system development; GO:0007417 central nervous system devel…	GO:0005622 intracellular; GO:0005623 cell; GO:0005737 cytoplasm; GO:0005829 cytosol;	GO:0003824 catalytic activity; GO:0004421 hydroxymethylglutaryl-CoA synthase activity; GO:0005488 binding; GO:0005515 protein binding; GO:0008144 drug binding; GO:0016740 transferase activity; GO:0016746 transferase activity, transferring acyl groups; GO:0016853 isomerase activity; GO:0036094 small molecule binding; GO:0042802 identical protein binding; GO:0042803 protein homodimerization activit…	PF01154; PF08540	Hydroxymethylglutaryl-coenzyme A synthase N terminal; Hydroxymethylglutaryl-coenzyme A synthase C terminal	H	KOG1393	Hydroxymethylglutaryl-CoA synthase
Q03111	Protein ENL OS=Homo sapiens OX=9606 GN=MLLT1 PE=1 SV=2	MLLT1	0.619	0.0448508	Down	62.055	12.7	6	6	6	3	3	4	2	2	3	5	3	4	1.2512	0.921837	1.49509	1.17664	1.21123	0.67198	0.643757	0.815354	0.812905	nucleus	K15187	MLLT1_3; YEATS domain-containing protein 1/3	hsa05202 Transcriptional misregulation in cancer	GO:0006139 nucleobase-containing compound metabolic process; GO:0006351 transcription, DNA-templated; GO:0006354 DNA-templated transcription, elongation; GO:0006355 regulation of transcription, DNA-templated; GO:0006357 regulation of transcription by RNA polymerase II; GO:0006366 transcription by RNA polymerase II; GO:0006368 transcription elongation from RNA polymerase II promoter; GO:0006725 ce…	GO:0001650 fibrillar center; GO:0005622 intracellular; GO:0005623 cell; GO:0005634 nucleus; GO:0005654 nucleoplasm; GO:0005730 nucleolus; GO:0005737 cytoplasm; GO:0005829 cytosol; GO:0008023 transcription elongation factor complex; GO:0031974 membrane-enclosed lumen; GO:0031981 nuclear lumen; GO:0032991 protein-containing complex; GO:0043226 organelle; GO:0043227 membrane-bounded organelle; GO:00…	GO:0000981 DNA-binding transcription factor activity, RNA polymerase II-specific; GO:0003676 nucleic acid binding; GO:0003677 DNA binding; GO:0003700 DNA-binding transcription factor activity; GO:0005488 binding; GO:0097159 organic cyclic compound binding; GO:0140110 transcription regulator activity; GO:1901363 heterocyclic compound binding;			K	KOG3149	Transcription initiation factor IIF, auxiliary subunit
Q12834	Cell division cycle protein 20 homolog OS=Homo sapiens OX=9606 GN=CDC20 PE=1 SV=2	CDC20	0.428	0.000862535	Down	54.722	11.4	4	4	4	4	4	4	2	3	4	3	2	2	1.44538	1.55813	1.72781	0.782438	0.76511	0.694273	0.614149	0.787197	0.625516	nucleus	K03363	CDC20; cell division cycle 20, cofactor of APC complex	hsa04110 Cell cycle; hsa05203 Viral carcinogenesis; hsa05166 Human T-cell leukemia virus 1 infection; hsa04120 Ubiquitin mediated proteolysis; hsa04114 Oocyte meiosis	GO:0000070 mitotic sister chromatid segregation; GO:0000226 microtubule cytoskeleton organization; GO:0000278 mitotic cell cycle; GO:0000280 nuclear division; GO:0000819 sister chromatid segregation; GO:0006464 cellular protein modification process; GO:0006508 proteolysis; GO:0006511 ubiquitin-dependent protein catabolic process; GO:0006807 nitrogen compound metabolic process; GO:0006996 organell…	GO:0005622 intracellular; GO:0005623 cell; GO:0005634 nucleus; GO:0005654 nucleoplasm; GO:0005737 cytoplasm; GO:0005813 centrosome; GO:0005815 microtubule organizing center; GO:0005819 spindle; GO:0005829 cytosol; GO:0005856 cytoskeleton; GO:0015630 microtubule cytoskeleton; GO:0031974 membrane-enclosed lumen; GO:0031981 nuclear lumen; GO:0032991 protein-containing complex; GO:0043226 organelle; …	GO:0005488 binding; GO:0005515 protein binding; GO:0008022 protein C-terminus binding; GO:0019899 enzyme binding; GO:0042826 histone deacetylase binding;			DO	KOG0305	Anaphase promoting complex, Cdc20, Cdh1, and Ama1 subunits
Q12899	Tripartite motif-containing protein 26 OS=Homo sapiens OX=9606 GN=TRIM26 PE=1 SV=1	TRIM26	0.65	0.00177386	Down	62.165	17.1	7	7	7	4	6	6	3	3	4	2	4	5	1.37801	1.26536	1.4255	0.692872	0.690653	0.902394	0.803591	0.935245	0.906366	cytoplasm,nucleus	K12008			GO:0002376 immune system process; GO:0006355 regulation of transcription, DNA-templated; GO:0006950 response to stress; GO:0006952 defense response; GO:0006955 immune response; GO:0007154 cell communication; GO:0007165 signal transduction; GO:0007166 cell surface receptor signaling pathway; GO:0009889 regulation of biosynthetic process; GO:0009987 cellular process; GO:0010033 response to organic …	GO:0005622 intracellular; GO:0005623 cell; GO:0005737 cytoplasm; GO:0005829 cytosol;	GO:0003676 nucleic acid binding; GO:0003677 DNA binding; GO:0005488 binding; GO:0043167 ion binding; GO:0043169 cation binding; GO:0046872 metal ion binding; GO:0097159 organic cyclic compound binding; GO:1901363 heterocyclic compound binding;	PF00643	B-box zinc finger	K	KOG2177	Predicted E3 ubiquitin ligase
Q12983	BCL2/adenovirus E1B 19 kDa protein-interacting protein 3 OS=Homo sapiens OX=9606 GN=BNIP3 PE=1 SV=3	BNIP3	0.631	0.00166764	Down	27.832	13.5	3	3	3	3	3	3	3	2	3	3	3	3	1.20494	1.30607	1.23513	0.957442	0.955521	0.977368	0.801476	0.856295	0.705771	cytoplasm	K15464	BNIP3; BCL2/adenovirus E1B 19 kDa protein-interacting protein 3	hsa05134 Legionellosis; hsa04137 Mitophagy - animal; hsa04140 Autophagy - animal; hsa04068 FoxO signaling pathway; hsa05131 Shigellosis	GO:0000302 response to reactive oxygen species; GO:0000422 autophagy of mitochondrion; GO:0001666 response to hypoxia; GO:0002252 immune effector process; GO:0002376 immune system process; GO:0006807 nitrogen compound metabolic process; GO:0006810 transport; GO:0006839 mitochondrial transport; GO:0006873 cellular ion homeostasis; GO:0006874 cellular calcium ion homeostasis; GO:0006875 cellular me…	GO:0005622 intracellular; GO:0005623 cell; GO:0005634 nucleus; GO:0005635 nuclear envelope; GO:0005654 nucleoplasm; GO:0005737 cytoplasm; GO:0005739 mitochondrion; GO:0005740 mitochondrial envelope; GO:0005741 mitochondrial outer membrane; GO:0005783 endoplasmic reticulum; GO:0012505 endomembrane system; GO:0014069 postsynaptic density; GO:0016020 membrane; GO:0016021 integral component of membra…	GO:0005488 binding; GO:0005515 protein binding; GO:0019899 enzyme binding; GO:0042802 identical protein binding; GO:0042803 protein homodimerization activity; GO:0046982 protein heterodimerization activity; GO:0046983 protein dimerization activity; GO:0051020 GTPase binding;
Q13426	DNA repair protein XRCC4 OS=Homo sapiens OX=9606 GN=XRCC4 PE=1 SV=2	XRCC4	0.64	0.0142151	Down	38.286	29.2	7	7	7	7	6	4	5	5	6	3	5	3	1.31116	1.00597	1.02006	1.09928	1.31494	1.1135	0.634704	0.711174	0.789222	nucleus	K10886	XRCC4; DNA-repair protein XRCC4	hsa03450 Non-homologous end-joining	GO:0000722 telomere maintenance via recombination; GO:0000723 telomere maintenance; GO:0000726 non-recombinational repair; GO:0001701 in utero embryonic development; GO:0001775 cell activation; GO:0002200 somatic diversification of immune receptors; GO:0002204 somatic recombination of immunoglobulin genes involved in immune response; GO:0002208 somatic diversification of immunoglobulins involved …	GO:0000109 nucleotide-excision repair complex; GO:0000228 nuclear chromosome; GO:0000781 chromosome, telomeric region; GO:0000784 nuclear chromosome, telomeric region; GO:0005622 intracellular; GO:0005623 cell; GO:0005634 nucleus; GO:0005654 nucleoplasm; GO:0005694 chromosome; GO:0005737 cytoplasm; GO:0005829 cytosol; GO:0005958 DNA-dependent protein kinase-DNA ligase 4 complex; GO:0031974 membra…	GO:0005488 binding; GO:0005515 protein binding; GO:0008022 protein C-terminus binding; GO:0042802 identical protein binding;
Q14493	Histone RNA hairpin-binding protein OS=Homo sapiens OX=9606 GN=SLBP PE=1 SV=1	SLBP	0.602	0.00944656	Down	31.285	15.2	4	4	4	3	3	3	3	3	3	2	3	3	1.40714	1.27609	1.13318	0.920153	0.940828	1.02565	0.643361	0.875087	0.778511	nucleus	K18710			GO:0006139 nucleobase-containing compound metabolic process; GO:0006259 DNA metabolic process; GO:0006260 DNA replication; GO:0006261 DNA-dependent DNA replication; GO:0006351 transcription, DNA-templated; GO:0006353 DNA-templated transcription, termination; GO:0006366 transcription by RNA polymerase II; GO:0006369 termination of RNA polymerase II transcription; GO:0006396 RNA processing; GO:0006…	GO:0005622 intracellular; GO:0005623 cell; GO:0005634 nucleus; GO:0005654 nucleoplasm; GO:0005730 nucleolus; GO:0005737 cytoplasm; GO:0005829 cytosol; GO:0031974 membrane-enclosed lumen; GO:0031981 nuclear lumen; GO:0032991 protein-containing complex; GO:0043226 organelle; GO:0043227 membrane-bounded organelle; GO:0043228 non-membrane-bounded organelle; GO:0043229 intracellular organelle; GO:0043…	GO:0003676 nucleic acid binding; GO:0003723 RNA binding; GO:0003729 mRNA binding; GO:0005488 binding; GO:0036002 pre-mRNA binding; GO:0071207 histone pre-mRNA stem-loop binding; GO:0071208 histone pre-mRNA DCP binding; GO:0097159 organic cyclic compound binding; GO:1901363 heterocyclic compound binding;			A	KOG3934	Histone mRNA stem-loop binding protein
Q14807	Kinesin-like protein KIF22 OS=Homo sapiens OX=9606 GN=KIF22 PE=1 SV=5	KIF22	0.59	0.000251828	Down	73.261	24.8	14	14	14	11	9	12	8	6	8	6	9	5	1.27902	1.29545	1.33375	0.962047	0.949649	0.873996	0.73239	0.740578	0.833125	mitochondria	K10403	KIF22; kinesin family member 22	hsa04914 Progesterone-mediated oocyte maturation	GO:0000070 mitotic sister chromatid segregation; GO:0000278 mitotic cell cycle; GO:0000280 nuclear division; GO:0000819 sister chromatid segregation; GO:0002376 immune system process; GO:0002478 antigen processing and presentation of exogenous peptide antigen; GO:0002495 antigen processing and presentation of peptide antigen via MHC class II; GO:0002504 antigen processing and presentation of pept…	GO:0000775 chromosome, centromeric region; GO:0000776 kinetochore; GO:0000785 chromatin; GO:0005622 intracellular; GO:0005623 cell; GO:0005634 nucleus; GO:0005654 nucleoplasm; GO:0005694 chromosome; GO:0005737 cytoplasm; GO:0005819 spindle; GO:0005829 cytosol; GO:0005856 cytoskeleton; GO:0005871 kinesin complex; GO:0005875 microtubule associated complex; GO:0015630 microtubule cytoskeleton; GO:00…	GO:0003676 nucleic acid binding; GO:0003677 DNA binding; GO:0003774 motor activity; GO:0003777 microtubule motor activity; GO:0003824 catalytic activity; GO:0005488 binding; GO:0016462 pyrophosphatase activity; GO:0016787 hydrolase activity; GO:0016817 hydrolase activity, acting on acid anhydrides; GO:0016818 hydrolase activity, acting on acid anhydrides, in phosphorus-containing anhydrides; GO:0…	PF00225; PF12836	Kinesin motor domain; Helix-hairpin-helix motif	Z	KOG0242	Kinesin-like protein
Q15014	Mortality factor 4-like protein 2 OS=Homo sapiens OX=9606 GN=MORF4L2 PE=1 SV=1	MORF4L2	0.546	9.42336e-06	Down	32.307	37.5	9	7	9	8	8	8	6	7	7	7	8	7	1.39052	1.41714	1.3725	0.845032	0.81645	0.877574	0.789472	0.74091	0.750402	nucleus	K11342			GO:0006325 chromatin organization; GO:0006338 chromatin remodeling; GO:0006342 chromatin silencing; GO:0006355 regulation of transcription, DNA-templated; GO:0006357 regulation of transcription by RNA polymerase II; GO:0006464 cellular protein modification process; GO:0006473 protein acetylation; GO:0006475 internal protein amino acid acetylation; GO:0006476 protein deacetylation; GO:0006807 nitr…	GO:0000123 histone acetyltransferase complex; GO:0005622 intracellular; GO:0005623 cell; GO:0005634 nucleus; GO:0005654 nucleoplasm; GO:0005730 nucleolus; GO:0005886 plasma membrane; GO:0016020 membrane; GO:0031248 protein acetyltransferase complex; GO:0031974 membrane-enclosed lumen; GO:0031981 nuclear lumen; GO:0032991 protein-containing complex; GO:0035267 NuA4 histone acetyltransferase comple…				K	KOG3001	Dosage compensation regulatory complex/histone acetyltransferase complex, subunit MSL-3/MRG15/EAF3, and related CHROMO domain-containing proteins
Q15036	Sorting nexin-17 OS=Homo sapiens OX=9606 GN=SNX17 PE=1 SV=1	SNX17	0.641	0.000578407	Down	52.901	20	6	6	6	5	6	4	5	5	4	5	4	4	1.23042	1.2441	1.20587	0.985227	0.958538	1.01691	0.849302	0.729307	0.780324	nucleus	K17929			GO:0001568 blood vessel development; GO:0001944 vasculature development; GO:0003205 cardiac chamber development; GO:0003279 cardiac septum development; GO:0006066 alcohol metabolic process; GO:0006629 lipid metabolic process; GO:0006706 steroid catabolic process; GO:0006707 cholesterol catabolic process; GO:0006810 transport; GO:0006886 intracellular protein transport; GO:0006897 endocytosis; GO:…	GO:0005622 intracellular; GO:0005623 cell; GO:0005737 cytoplasm; GO:0005768 endosome; GO:0005769 early endosome; GO:0005794 Golgi apparatus; GO:0005829 cytosol; GO:0010008 endosome membrane; GO:0012505 endomembrane system; GO:0012506 vesicle membrane; GO:0016020 membrane; GO:0030659 cytoplasmic vesicle membrane; GO:0031090 organelle membrane; GO:0031410 cytoplasmic vesicle; GO:0031982 vesicle; GO…	GO:0005102 signaling receptor binding; GO:0005488 binding; GO:0005515 protein binding; GO:0005543 phospholipid binding; GO:0008022 protein C-terminus binding; GO:0008289 lipid binding; GO:0035091 phosphatidylinositol binding; GO:0043167 ion binding; GO:0043168 anion binding; GO:0050750 low-density lipoprotein particle receptor binding; GO:0070325 lipoprotein particle receptor binding;	PF00787	PX domain	U	KOG3784	Sorting nexin protein SNX27
Q16763	Ubiquitin-conjugating enzyme E2 S OS=Homo sapiens OX=9606 GN=UBE2S PE=1 SV=2	UBE2S	0.648	6.67973e-06	Down	23.845	36.9	5	5	5	5	5	5	5	5	5	5	5	5	1.18944	1.22007	1.19803	0.979672	1.04768	1.02622	0.798244	0.771498	0.769142	cytoplasm	K10583	UBE2S; ubiquitin-conjugating enzyme E2 S [EC:2.3.2.23]	hsa04120 Ubiquitin mediated proteolysis	GO:0000209 protein polyubiquitination; GO:0000278 mitotic cell cycle; GO:0000280 nuclear division; GO:0006464 cellular protein modification process; GO:0006508 proteolysis; GO:0006511 ubiquitin-dependent protein catabolic process; GO:0006807 nitrogen compound metabolic process; GO:0006996 organelle organization; GO:0007049 cell cycle; GO:0008152 metabolic process; GO:0009056 catabolic process; GO…	GO:0000151 ubiquitin ligase complex; GO:0000152 nuclear ubiquitin ligase complex; GO:0005622 intracellular; GO:0005623 cell; GO:0005634 nucleus; GO:0005654 nucleoplasm; GO:0005680 anaphase-promoting complex; GO:0005737 cytoplasm; GO:0005829 cytosol; GO:0031461 cullin-RING ubiquitin ligase complex; GO:0031974 membrane-enclosed lumen; GO:0031981 nuclear lumen; GO:0032991 protein-containing complex;…	GO:0003824 catalytic activity; GO:0004842 ubiquitin-protein transferase activity; GO:0005488 binding; GO:0005515 protein binding; GO:0016740 transferase activity; GO:0019787 ubiquitin-like protein transferase activity; GO:0019899 enzyme binding; GO:0031625 ubiquitin protein ligase binding; GO:0044389 ubiquitin-like protein ligase binding; GO:0061630 ubiquitin protein ligase activity; GO:0061631 u…	PF00179	Ubiquitin-conjugating enzyme	O	KOG0423	Ubiquitin-protein ligase
Q3ZCM7	Tubulin beta-8 chain OS=Homo sapiens OX=9606 GN=TUBB8 PE=1 SV=2	TUBB8	0.626	0.00321302	Down	49.775	24.5	10	2	2	2	2	2	2	2	2	2	2	2	1.31163	1.11663	1.10457	1.18282	1.30643	0.767202	0.802187	0.731528	0.67701	cytoplasm	K07375	TUBB; tubulin beta	hsa05016 Huntington disease; hsa04540 Gap junction; hsa05012 Parkinson disease; hsa05010 Alzheimer disease; hsa05132 Salmonella infection; hsa04145 Phagosome; hsa05130 Pathogenic Escherichia coli infection; hsa05022 Pathways of neurodegeneration - multiple diseases; hsa05014 Amyotrophic lateral sclerosis; hsa05020 Prion disease	GO:0000003 reproduction; GO:0000212 meiotic spindle organization; GO:0000226 microtubule cytoskeleton organization; GO:0000280 nuclear division; GO:0001556 oocyte maturation; GO:0003006 developmental process involved in reproduction; GO:0006996 organelle organization; GO:0007010 cytoskeleton organization; GO:0007017 microtubule-based process; GO:0007049 cell cycle; GO:0007051 spindle organization…	GO:0005622 intracellular; GO:0005623 cell; GO:0005819 spindle; GO:0005856 cytoskeleton; GO:0015630 microtubule cytoskeleton; GO:0043226 organelle; GO:0043228 non-membrane-bounded organelle; GO:0043229 intracellular organelle; GO:0043232 intracellular non-membrane-bounded organelle; GO:0072687 meiotic spindle;		PF00091; PF03953	Tubulin/FtsZ family, GTPase domain; Tubulin C-terminal domain	Z	KOG1375	Beta tubulin
Q53GT1	Kelch-like protein 22 OS=Homo sapiens OX=9606 GN=KLHL22 PE=1 SV=2	KLHL22	0.585	0.0382773	Down	71.666	11	6	6	6	4	4	4	4	3	3	4	4	3	1.08575	1.29218	1.44061	0.971006	1.04526	0.9323	0.887533	0.52605	0.819304	cytoplasm	K10459			GO:0000070 mitotic sister chromatid segregation; GO:0000075 cell cycle checkpoint; GO:0000278 mitotic cell cycle; GO:0000280 nuclear division; GO:0000819 sister chromatid segregation; GO:0006464 cellular protein modification process; GO:0006513 protein monoubiquitination; GO:0006807 nitrogen compound metabolic process; GO:0006996 organelle organization; GO:0007049 cell cycle; GO:0007059 chromosom…	GO:0000151 ubiquitin ligase complex; GO:0000922 spindle pole; GO:0005622 intracellular; GO:0005623 cell; GO:0005737 cytoplasm; GO:0005813 centrosome; GO:0005815 microtubule organizing center; GO:0005819 spindle; GO:0005827 polar microtubule; GO:0005829 cytosol; GO:0005856 cytoskeleton; GO:0005874 microtubule; GO:0005876 spindle microtubule; GO:0015630 microtubule cytoskeleton; GO:0031461 cullin-R…		PF00651; PF07707; PF13415	BTB/POZ domain; BTB And C-terminal Kelch; Galactose oxidase, central domain	T	KOG4441	Proteins containing BTB/POZ and Kelch domains, involved in regulatory/signal transduction processes
Q58WW2	DDB1- and CUL4-associated factor 6 OS=Homo sapiens OX=9606 GN=DCAF6 PE=1 SV=1	DCAF6	0.464	0.0446499	Down	96.291	8.1	5	5	5	3	3	3	3	2	4	3	3	2	1.36816	1.29391	1.41563	1.05857		0.973625	0.330329	0.692805	0.866968	nucleus	K11795			GO:0006355 regulation of transcription, DNA-templated; GO:0006357 regulation of transcription by RNA polymerase II; GO:0006464 cellular protein modification process; GO:0006807 nitrogen compound metabolic process; GO:0008152 metabolic process; GO:0009889 regulation of biosynthetic process; GO:0009891 positive regulation of biosynthetic process; GO:0009893 positive regulation of metabolic process;…	GO:0000151 ubiquitin ligase complex; GO:0005622 intracellular; GO:0005623 cell; GO:0005634 nucleus; GO:0005654 nucleoplasm; GO:0005737 cytoplasm; GO:0005829 cytosol; GO:0005912 adherens junction; GO:0005925 focal adhesion; GO:0030054 cell junction; GO:0030055 cell-substrate junction; GO:0031461 cullin-RING ubiquitin ligase complex; GO:0031974 membrane-enclosed lumen; GO:0031981 nuclear lumen; GO:…	GO:0003712 transcription coregulator activity; GO:0003713 transcription coactivator activity; GO:0030374 nuclear receptor transcription coactivator activity; GO:0140110 transcription regulator activity;			S	KOG1334	WD40 repeat protein
Q6NUK4	Receptor expression-enhancing protein 3 OS=Homo sapiens OX=9606 GN=REEP3 PE=1 SV=1	REEP3	0.659	0.00202119	Down	29.264	18.8	4	4	4	3	2	3	2	4	3	3	3	1	1.19784	1.25821	1.18919	0.968578	0.740787	1.04497	0.763566	0.836858		mitochondria	K17338			GO:0000278 mitotic cell cycle; GO:0006996 organelle organization; GO:0006997 nucleus organization; GO:0006998 nuclear envelope organization; GO:0007049 cell cycle; GO:0007084 mitotic nuclear envelope reassembly; GO:0009987 cellular process; GO:0010256 endomembrane system organization; GO:0016043 cellular component organization; GO:0022402 cell cycle process; GO:0031468 nuclear envelope reassembly…					U	KOG1726	HVA22/DP1 gene product-related proteins
Q6PL18	ATPase family AAA domain-containing protein 2 OS=Homo sapiens OX=9606 GN=ATAD2 PE=1 SV=1	ATAD2	0.599	8.60864e-06	Down	158.55	28.9	28	28	28	28	26	25	23	23	22	21	20	23	1.28358	1.31119	1.32383	0.873186	0.911746	0.950305	0.771724	0.806049	0.768399	nucleus	K22531			GO:0006355 regulation of transcription, DNA-templated; GO:0006357 regulation of transcription by RNA polymerase II; GO:0009889 regulation of biosynthetic process; GO:0009891 positive regulation of biosynthetic process; GO:0009893 positive regulation of metabolic process; GO:0010468 regulation of gene expression; GO:0010556 regulation of macromolecule biosynthetic process; GO:0010557 positive regu…	GO:0005622 intracellular; GO:0005623 cell; GO:0005634 nucleus; GO:0005654 nucleoplasm; GO:0031974 membrane-enclosed lumen; GO:0031981 nuclear lumen; GO:0043226 organelle; GO:0043227 membrane-bounded organelle; GO:0043229 intracellular organelle; GO:0043231 intracellular membrane-bounded organelle; GO:0043233 organelle lumen; GO:0070013 intracellular organelle lumen;	GO:0003682 chromatin binding; GO:0003824 catalytic activity; GO:0005488 binding; GO:0005515 protein binding; GO:0016462 pyrophosphatase activity; GO:0016787 hydrolase activity; GO:0016817 hydrolase activity, acting on acid anhydrides; GO:0016818 hydrolase activity, acting on acid anhydrides, in phosphorus-containing anhydrides; GO:0016887 ATPase activity; GO:0017111 nucleoside-triphosphatase acti…	PF00004; PF00439	ATPase family associated with various cellular activities (AAA); Bromodomain	O	KOG0732	AAA+-type ATPase containing the bromodomain
Q71UM5	40S ribosomal protein S27-like OS=Homo sapiens OX=9606 GN=RPS27L PE=1 SV=3	RPS27L	0.527	0.0134403	Down	9.4771	39.3	4	2	2	2	2	2	2	2	1	2	2	1	1.08585	1.17815	1.16339	1.15759	1.21168		0.69773	0.505597		extracellular	K02978	RP-S27e; small subunit ribosomal protein S27e	hsa03010 Ribosome; hsa05171 Coronavirus disease - COVID-19	GO:0000028 ribosomal small subunit assembly; GO:0000075 cell cycle checkpoint; GO:0000077 DNA damage checkpoint; GO:0000278 mitotic cell cycle; GO:0006412 translation; GO:0006417 regulation of translation; GO:0006518 peptide metabolic process; GO:0006807 nitrogen compound metabolic process; GO:0006915 apoptotic process; GO:0006919 activation of cysteine-type endopeptidase activity involved in apo…	GO:0005622 intracellular; GO:0005623 cell; GO:0005634 nucleus; GO:0005737 cytoplasm; GO:0005829 cytosol; GO:0005840 ribosome; GO:0015935 small ribosomal subunit; GO:0022626 cytosolic ribosome; GO:0022627 cytosolic small ribosomal subunit; GO:0032991 protein-containing complex; GO:0043226 organelle; GO:0043227 membrane-bounded organelle; GO:0043228 non-membrane-bounded organelle; GO:0043229 intrac…	GO:0003676 nucleic acid binding; GO:0003735 structural constituent of ribosome; GO:0005198 structural molecule activity; GO:0005488 binding; GO:0008047 enzyme activator activity; GO:0008494 translation activator activity; GO:0008656 cysteine-type endopeptidase activator activity involved in apoptotic process; GO:0016504 peptidase activator activity; GO:0016505 peptidase activator activity involve…			J	KOG1779	40s ribosomal protein S27
Q86TB9	Protein PAT1 homolog 1 OS=Homo sapiens OX=9606 GN=PATL1 PE=1 SV=2	PATL1	0.539	0.00469574	Down	86.849	10.5	5	5	5	3	4	5	3	4	3	4	3	3	1.60262	1.16338	1.16727	1.26777	0.962267	0.717181	0.707655	0.715781	0.69607	nucleus	K12617	PATL1; DNA topoisomerase 2-associated protein PAT1	hsa03018 RNA degradation	GO:0000288 nuclear-transcribed mRNA catabolic process, deadenylation-dependent decay; GO:0000290 deadenylation-dependent decapping of nuclear-transcribed mRNA; GO:0000291 nuclear-transcribed mRNA catabolic process, exonucleolytic; GO:0000956 nuclear-transcribed mRNA catabolic process; GO:0006139 nucleobase-containing compound metabolic process; GO:0006401 RNA catabolic process; GO:0006402 mRNA ca…	GO:0000932 P-body; GO:0005622 intracellular; GO:0005623 cell; GO:0005634 nucleus; GO:0005654 nucleoplasm; GO:0005737 cytoplasm; GO:0005829 cytosol; GO:0016604 nuclear body; GO:0016605 PML body; GO:0016607 nuclear speck; GO:0031974 membrane-enclosed lumen; GO:0031981 nuclear lumen; GO:0032991 protein-containing complex; GO:0035770 ribonucleoprotein granule; GO:0036464 cytoplasmic ribonucleoprotein…	GO:0002151 G-quadruplex RNA binding; GO:0003676 nucleic acid binding; GO:0003723 RNA binding; GO:0003727 single-stranded RNA binding; GO:0005488 binding; GO:0008187 poly-pyrimidine tract binding; GO:0008266 poly(U) RNA binding; GO:0030371 translation repressor activity; GO:0034046 poly(G) binding; GO:0045182 translation regulator activity; GO:0070717 poly-purine tract binding; GO:0097159 organic …			A	KOG4592	Uncharacterized conserved protein
Q86Y07	Serine/threonine-protein kinase VRK2 OS=Homo sapiens OX=9606 GN=VRK2 PE=1 SV=3	VRK2	0.663	0.0327011	Down	58.14	15	5	5	5	3	4	3	4	3	5	4	2	4	1.24707	1.36074	1.07921	0.931853	1.061	0.876947	0.790121	0.984494	0.668564	cytoplasm	K08816			GO:0001932 regulation of protein phosphorylation; GO:0001959 regulation of cytokine-mediated signaling pathway; GO:0006464 cellular protein modification process; GO:0006468 protein phosphorylation; GO:0006793 phosphorus metabolic process; GO:0006796 phosphate-containing compound metabolic process; GO:0006807 nitrogen compound metabolic process; GO:0006950 response to stress; GO:0006979 response t…	GO:0005622 intracellular; GO:0005623 cell; GO:0005634 nucleus; GO:0005737 cytoplasm; GO:0005739 mitochondrion; GO:0005740 mitochondrial envelope; GO:0005783 endoplasmic reticulum; GO:0005789 endoplasmic reticulum membrane; GO:0012505 endomembrane system; GO:0016020 membrane; GO:0031090 organelle membrane; GO:0031966 mitochondrial membrane; GO:0031967 organelle envelope; GO:0031975 envelope; GO:00…	GO:0003824 catalytic activity; GO:0004672 protein kinase activity; GO:0004674 protein serine/threonine kinase activity; GO:0005488 binding; GO:0005515 protein binding; GO:0016301 kinase activity; GO:0016740 transferase activity; GO:0016772 transferase activity, transferring phosphorus-containing groups; GO:0016773 phosphotransferase activity, alcohol group as acceptor; GO:0019899 enzyme binding; …	PF00069	Protein kinase domain	T	KOG1164	Casein kinase (serine/threonine/tyrosine protein kinase)
Q8TF72	Protein Shroom3 OS=Homo sapiens OX=9606 GN=SHROOM3 PE=1 SV=2	SHROOM3	0.342	0.0275027	Down	216.85	12.2	15	15	15	10	9	13	5	7	4	7	6	4	1.3704	1.92716	2.03961	0.656621	0.827329	0.352333	0.741658	0.786463	0.298423	nucleus	K18625			GO:0000902 cell morphogenesis; GO:0001838 embryonic epithelial tube formation; GO:0001841 neural tube formation; GO:0001843 neural tube closure; GO:0002009 morphogenesis of an epithelium; GO:0002064 epithelial cell development; GO:0002065 columnar/cuboidal epithelial cell differentiation; GO:0002066 columnar/cuboidal epithelial cell development; GO:0006996 organelle organization; GO:0007010 cytos…	GO:0005622 intracellular; GO:0005623 cell; GO:0005856 cytoskeleton; GO:0005886 plasma membrane; GO:0005911 cell-cell junction; GO:0005912 adherens junction; GO:0016020 membrane; GO:0016324 apical plasma membrane; GO:0030054 cell junction; GO:0043226 organelle; GO:0043228 non-membrane-bounded organelle; GO:0043229 intracellular organelle; GO:0043232 intracellular non-membrane-bounded organelle; GO…	GO:0003779 actin binding; GO:0005488 binding; GO:0005515 protein binding; GO:0008092 cytoskeletal protein binding;	PF00595	PDZ domain (Also known as DHR or GLGF)
Q8WXA9	Splicing regulatory glutamine/lysine-rich protein 1 OS=Homo sapiens OX=9606 GN=SREK1 PE=1 SV=1	SREK1	0.441	0.000521675	Down	59.38	9.4	3	3	3	1	3	3	2	3	3	2	3	2		1.36759	1.23954	2.09171	1.2039	0.371816	0.604835	0.569583	0.551024	nucleus	K13165				GO:0005622 intracellular; GO:0005623 cell; GO:0005634 nucleus; GO:0005654 nucleoplasm; GO:0016604 nuclear body; GO:0016607 nuclear speck; GO:0031974 membrane-enclosed lumen; GO:0031981 nuclear lumen; GO:0043226 organelle; GO:0043227 membrane-bounded organelle; GO:0043229 intracellular organelle; GO:0043231 intracellular membrane-bounded organelle; GO:0043233 organelle lumen; GO:0070013 intracellu…		PF00076	RNA recognition motif. (a.k.a. RRM, RBD, or RNP domain)	A	KOG4676	Splicing factor, arginine/serine-rich
Q92995	Ubiquitin carboxyl-terminal hydrolase 13 OS=Homo sapiens OX=9606 GN=USP13 PE=1 SV=2	USP13	0.616	0.0015481	Down	97.326	15.3	10	8	8	6	6	5	8	6	7	7	5	8	1.24282	1.30029	1.1204	1.12156	1.06801	0.890135	0.819976	0.706281	0.730529	cytoplasm,nucleus	K11836			GO:0006355 regulation of transcription, DNA-templated; GO:0006464 cellular protein modification process; GO:0006508 proteolysis; GO:0006807 nitrogen compound metabolic process; GO:0006950 response to stress; GO:0008152 metabolic process; GO:0008283 cell population proliferation; GO:0009056 catabolic process; GO:0009057 macromolecule catabolic process; GO:0009889 regulation of biosynthetic process…	GO:0005622 intracellular; GO:0005623 cell; GO:0005634 nucleus; GO:0005654 nucleoplasm; GO:0005737 cytoplasm; GO:0005829 cytosol; GO:0031974 membrane-enclosed lumen; GO:0031981 nuclear lumen; GO:0043226 organelle; GO:0043227 membrane-bounded organelle; GO:0043229 intracellular organelle; GO:0043231 intracellular membrane-bounded organelle; GO:0043233 organelle lumen; GO:0070013 intracellular organ…	GO:0003824 catalytic activity; GO:0004175 endopeptidase activity; GO:0004197 cysteine-type endopeptidase activity; GO:0004843 thiol-dependent ubiquitin-specific protease activity; GO:0005488 binding; GO:0005515 protein binding; GO:0008233 peptidase activity; GO:0008234 cysteine-type peptidase activity; GO:0016787 hydrolase activity; GO:0019783 ubiquitin-like protein-specific protease activity; GO…	PF02148; PF00627	Zn-finger in ubiquitin-hydrolases and other protein; UBA/TS-N domain	O	KOG0944	Ubiquitin-specific protease UBP14
Q96F63	Coiled-coil domain-containing protein 97 OS=Homo sapiens OX=9606 GN=CCDC97 PE=1 SV=1	CCDC97	0.491	0.0108147	Down	38.946	22.7	4	4	4	4	3	2	2	3	2	3	1	2	1.35555	1.32944	1.0284	1.1049	1.46121	0.504545	0.569631		0.646323	cytoplasm					GO:0005622 intracellular; GO:0005623 cell; GO:0005634 nucleus; GO:0005686 U2 snRNP; GO:0030532 small nuclear ribonucleoprotein complex; GO:0032991 protein-containing complex; GO:0043226 organelle; GO:0043227 membrane-bounded organelle; GO:0043229 intracellular organelle; GO:0043231 intracellular membrane-bounded organelle; GO:0097525 spliceosomal snRNP complex; GO:0120114 Sm-like protein family c…				S	KOG3044	Uncharacterized conserved protein
Q96T88	E3 ubiquitin-protein ligase UHRF1 OS=Homo sapiens OX=9606 GN=UHRF1 PE=1 SV=1	UHRF1	0.655	0.000814916	Down	89.813	30	17	16	17	14	12	13	13	12	12	11	7	9	1.16106	1.14147	1.2003	1.05845	1.0355	1.10724	0.774718	0.703115	0.818148	nucleus	K10638			GO:0000122 negative regulation of transcription by RNA polymerase II; GO:0006139 nucleobase-containing compound metabolic process; GO:0006259 DNA metabolic process; GO:0006325 chromatin organization; GO:0006355 regulation of transcription, DNA-templated; GO:0006357 regulation of transcription by RNA polymerase II; GO:0006464 cellular protein modification process; GO:0006508 proteolysis; GO:000651…	GO:0000228 nuclear chromosome; GO:0000785 chromatin; GO:0000790 nuclear chromatin; GO:0000791 euchromatin; GO:0000792 heterochromatin; GO:0005622 intracellular; GO:0005623 cell; GO:0005634 nucleus; GO:0005654 nucleoplasm; GO:0005657 replication fork; GO:0005694 chromosome; GO:0005720 nuclear heterochromatin; GO:0005737 cytoplasm; GO:0005886 plasma membrane; GO:0016020 membrane; GO:0016363 nuclear…	GO:0000166 nucleotide binding; GO:0000976 transcription regulatory region sequence-specific DNA binding; GO:0000987 cis-regulatory region sequence-specific DNA binding; GO:0001067 regulatory region nucleic acid binding; GO:0003676 nucleic acid binding; GO:0003677 DNA binding; GO:0003682 chromatin binding; GO:0003690 double-stranded DNA binding; GO:0003700 DNA-binding transcription factor activity…	PF00240; PF12148; PF00628; PF02182	Ubiquitin family; Protein of unknown function (DUF3590); PHD-finger; YDG/SRA domain
Q9BPZ3	Polyadenylate-binding protein-interacting protein 2 OS=Homo sapiens OX=9606 GN=PAIP2 PE=1 SV=1	PAIP2	0.482	0.00462598	Down	14.984	26	2	2	2	2	2	2	2	2	2	2	2	2	1.55324	1.0486	1.45991	1.32776	0.774682	0.87684	0.617659	0.663561	0.677746	cytoplasm,nucleus				GO:0006417 regulation of translation; GO:0006446 regulation of translational initiation; GO:0009889 regulation of biosynthetic process; GO:0009890 negative regulation of biosynthetic process; GO:0009892 negative regulation of metabolic process; GO:0010468 regulation of gene expression; GO:0010556 regulation of macromolecule biosynthetic process; GO:0010558 negative regulation of macromolecule bio…	GO:0005622 intracellular; GO:0005623 cell; GO:0005737 cytoplasm;	GO:0030371 translation repressor activity; GO:0045182 translation regulator activity;
Q9BV36	Melanophilin OS=Homo sapiens OX=9606 GN=MLPH PE=1 SV=1	MLPH	0.636	0.0030834	Down	65.948	13.2	5	5	5	4	5	4	2	4	3	3	3	3	1.37617	1.11266	1.30683	1.05363	0.726419	1.01107	0.839953	0.760251	0.813028	nucleus	K22235			GO:0006605 protein targeting; GO:0006810 transport; GO:0006886 intracellular protein transport; GO:0006928 movement of cell or subcellular component; GO:0008104 protein localization; GO:0009987 cellular process; GO:0015031 protein transport; GO:0015833 peptide transport; GO:0030029 actin filament-based process; GO:0030048 actin filament-based movement; GO:0030050 vesicle transport along actin fil…	GO:0001725 stress fiber; GO:0005622 intracellular; GO:0005623 cell; GO:0005737 cytoplasm; GO:0005815 microtubule organizing center; GO:0005856 cytoskeleton; GO:0005938 cell cortex; GO:0015629 actin cytoskeleton; GO:0015630 microtubule cytoskeleton; GO:0016459 myosin complex; GO:0016461 unconventional myosin complex; GO:0030425 dendrite; GO:0030863 cortical cytoskeleton; GO:0030864 cortical actin …	GO:0003779 actin binding; GO:0005488 binding; GO:0005515 protein binding; GO:0008017 microtubule binding; GO:0008092 cytoskeletal protein binding; GO:0015631 tubulin binding; GO:0017016 Ras GTPase binding; GO:0017022 myosin binding; GO:0017137 Rab GTPase binding; GO:0019899 enzyme binding; GO:0030674 protein-macromolecule adaptor activity; GO:0031267 small GTPase binding; GO:0031489 myosin V bind…
Q9BW19	Kinesin-like protein KIFC1 OS=Homo sapiens OX=9606 GN=KIFC1 PE=1 SV=2	KIFC1	0.498	0.00769206	Down	73.747	23	11	11	11	9	10	9	6	6	8	6	5	3	1.39663	1.55316	1.30803	0.8413	0.888931	0.891273	0.746429	0.838774	0.535467	nucleus	K10405			GO:0000003 reproduction; GO:0000070 mitotic sister chromatid segregation; GO:0000226 microtubule cytoskeleton organization; GO:0000278 mitotic cell cycle; GO:0000280 nuclear division; GO:0000819 sister chromatid segregation; GO:0006810 transport; GO:0006928 movement of cell or subcellular component; GO:0006996 organelle organization; GO:0007010 cytoskeleton organization; GO:0007017 microtubule-ba…	GO:0000922 spindle pole; GO:0005622 intracellular; GO:0005623 cell; GO:0005634 nucleus; GO:0005737 cytoplasm; GO:0005813 centrosome; GO:0005815 microtubule organizing center; GO:0005819 spindle; GO:0005856 cytoskeleton; GO:0005871 kinesin complex; GO:0005875 microtubule associated complex; GO:0015630 microtubule cytoskeleton; GO:0030139 endocytic vesicle; GO:0030496 midbody; GO:0031410 cytoplasmi…	GO:0000166 nucleotide binding; GO:0003774 motor activity; GO:0003777 microtubule motor activity; GO:0003824 catalytic activity; GO:0005488 binding; GO:0005524 ATP binding; GO:0008144 drug binding; GO:0008569 ATP-dependent microtubule motor activity, minus-end-directed; GO:0016462 pyrophosphatase activity; GO:0016787 hydrolase activity; GO:0016817 hydrolase activity, acting on acid anhydrides; GO:…	PF00225	Kinesin motor domain	Z	KOG0239	Kinesin (KAR3 subfamily)
Q9BX46	RNA-binding protein 24 OS=Homo sapiens OX=9606 GN=RBM24 PE=1 SV=1	RBM24	0.642	0.000483911	Down	24.776	24.6	4	4	4	4	3	2	3	4	4	2	1	2	1.23141	1.18434	1.27083	0.939205	0.904953	0.890344	0.794712		0.784203	nucleus	K25006			GO:0000381 regulation of alternative mRNA splicing, via spliceosome; GO:0003197 endocardial cushion development; GO:0006417 regulation of translation; GO:0006950 response to stress; GO:0006974 cellular response to DNA damage stimulus; GO:0007275 multicellular organism development; GO:0007507 heart development; GO:0009888 tissue development; GO:0009889 regulation of biosynthetic process; GO:000989…	GO:0005622 intracellular; GO:0005623 cell; GO:0005634 nucleus; GO:0005654 nucleoplasm; GO:0005737 cytoplasm; GO:0005829 cytosol; GO:0031974 membrane-enclosed lumen; GO:0031981 nuclear lumen; GO:0043226 organelle; GO:0043227 membrane-bounded organelle; GO:0043229 intracellular organelle; GO:0043231 intracellular membrane-bounded organelle; GO:0043233 organelle lumen; GO:0070013 intracellular organ…	GO:0003676 nucleic acid binding; GO:0003723 RNA binding; GO:0003729 mRNA binding; GO:0003730 mRNA 3'-UTR binding; GO:0005488 binding; GO:0017091 AU-rich element binding; GO:0035925 mRNA 3'-UTR AU-rich region binding; GO:0036002 pre-mRNA binding; GO:0097157 pre-mRNA intronic binding; GO:0097159 organic cyclic compound binding; GO:1901363 heterocyclic compound binding; GO:1990715 mRNA CDS binding; …	PF00076	RNA recognition motif. (a.k.a. RRM, RBD, or RNP domain)	A	KOG4205	RNA-binding protein musashi/mRNA cleavage and polyadenylation factor I complex, subunit HRP1
Q9BZQ6	ER degradation-enhancing alpha-mannosidase-like protein 3 OS=Homo sapiens OX=9606 GN=EDEM3 PE=1 SV=2	EDEM3	0.574	0.00223813	Down	104.66	11.8	8	8	8	5	7	6	5	3	4	4	4	3	1.4614	1.42619	1.4361	0.715737	0.721731	0.755102	0.787245	0.960987	0.735514	mitochondria	K10086	EDEM3; ER degradation enhancer, mannosidase alpha-like 3	hsa04141 Protein processing in endoplasmic reticulum	GO:0006464 cellular protein modification process; GO:0006491 N-glycan processing; GO:0006508 proteolysis; GO:0006511 ubiquitin-dependent protein catabolic process; GO:0006516 glycoprotein catabolic process; GO:0006517 protein deglycosylation; GO:0006807 nitrogen compound metabolic process; GO:0006950 response to stress; GO:0006986 response to unfolded protein; GO:0007154 cell communication; GO:00…	GO:0005622 intracellular; GO:0005623 cell; GO:0005737 cytoplasm; GO:0005783 endoplasmic reticulum; GO:0005788 endoplasmic reticulum lumen; GO:0012505 endomembrane system; GO:0031974 membrane-enclosed lumen; GO:0043226 organelle; GO:0043227 membrane-bounded organelle; GO:0043229 intracellular organelle; GO:0043231 intracellular membrane-bounded organelle; GO:0043233 organelle lumen; GO:0044322 end…	GO:0003824 catalytic activity; GO:0004553 hydrolase activity, hydrolyzing O-glycosyl compounds; GO:0004559 alpha-mannosidase activity; GO:0004571 mannosyl-oligosaccharide 1,2-alpha-mannosidase activity; GO:0015923 mannosidase activity; GO:0015924 mannosyl-oligosaccharide mannosidase activity; GO:0016787 hydrolase activity; GO:0016798 hydrolase activity, acting on glycosyl bonds;	PF01532	Glycosyl hydrolase family 47	G	KOG2430	Glycosyl hydrolase, family 47
Q9GZY8	Mitochondrial fission factor OS=Homo sapiens OX=9606 GN=MFF PE=1 SV=1	MFF	0.657	0.00285551	Down	38.464	28.4	7	7	7	4	7	5	7	5	5	5	4	5	1.29943	1.08844	1.20305	1.13491	1.05588	0.85875	0.846143	0.770031	0.743358	mitochondria	K22076			GO:0000266 mitochondrial fission; GO:0001836 release of cytochrome c from mitochondria; GO:0006605 protein targeting; GO:0006626 protein targeting to mitochondrion; GO:0006810 transport; GO:0006839 mitochondrial transport; GO:0006886 intracellular protein transport; GO:0006915 apoptotic process; GO:0006996 organelle organization; GO:0007005 mitochondrion organization; GO:0007031 peroxisome organi…	GO:0005622 intracellular; GO:0005623 cell; GO:0005737 cytoplasm; GO:0005739 mitochondrion; GO:0005740 mitochondrial envelope; GO:0005741 mitochondrial outer membrane; GO:0005777 peroxisome; GO:0008021 synaptic vesicle; GO:0012505 endomembrane system; GO:0016020 membrane; GO:0016021 integral component of membrane; GO:0019867 outer membrane; GO:0030133 transport vesicle; GO:0031090 organelle membra…	GO:0005488 binding; GO:0005515 protein binding; GO:0019899 enzyme binding; GO:0042802 identical protein binding; GO:0042803 protein homodimerization activity; GO:0044877 protein-containing complex binding; GO:0046983 protein dimerization activity; GO:0051020 GTPase binding;
Q9HA47	Uridine-cytidine kinase 1 OS=Homo sapiens OX=9606 GN=UCK1 PE=1 SV=1	UCK1	0.599	0.0241048	Down	31.434	19.1	4	3	3	1	2	2	2	1	3	2	1	2		1.0906	1.2257	1.07902		1.21802	0.654335		0.732323	cytoplasm	K00876	udk; uridine kinase [EC:2.7.1.48]	hsa00983 Drug metabolism - other enzymes; hsa00240 Pyrimidine metabolism; hsa01100 Metabolic pathways	GO:0006139 nucleobase-containing compound metabolic process; GO:0006206 pyrimidine nucleobase metabolic process; GO:0006213 pyrimidine nucleoside metabolic process; GO:0006220 pyrimidine nucleotide metabolic process; GO:0006221 pyrimidine nucleotide biosynthetic process; GO:0006222 UMP biosynthetic process; GO:0006725 cellular aromatic compound metabolic process; GO:0006753 nucleoside phosphate m…	GO:0005622 intracellular; GO:0005623 cell; GO:0005737 cytoplasm; GO:0005829 cytosol;	GO:0003824 catalytic activity; GO:0004849 uridine kinase activity; GO:0016301 kinase activity; GO:0016740 transferase activity; GO:0016772 transferase activity, transferring phosphorus-containing groups; GO:0019205 nucleobase-containing compound kinase activity; GO:0019206 nucleoside kinase activity;	PF00485	Phosphoribulokinase / Uridine kinase family	F	KOG4203	Armadillo/beta-Catenin/plakoglobin
Q9NPD8	Ubiquitin-conjugating enzyme E2 T OS=Homo sapiens OX=9606 GN=UBE2T PE=1 SV=1	UBE2T	0.594	4.01815e-06	Down	22.521	48.2	7	7	7	7	7	7	5	6	7	4	5	4	1.26482	1.23133	1.21062	1.0048	1.05205	1.03357	0.737702	0.741888	0.723229	mitochondria	K13960	UBE2T; ubiquitin-conjugating enzyme E2 T [EC:2.3.2.23]	hsa03460 Fanconi anemia pathway	GO:0000209 protein polyubiquitination; GO:0006139 nucleobase-containing compound metabolic process; GO:0006259 DNA metabolic process; GO:0006281 DNA repair; GO:0006464 cellular protein modification process; GO:0006513 protein monoubiquitination; GO:0006725 cellular aromatic compound metabolic process; GO:0006807 nitrogen compound metabolic process; GO:0006950 response to stress; GO:0006974 cellul…	GO:0005622 intracellular; GO:0005623 cell; GO:0005634 nucleus; GO:0005654 nucleoplasm; GO:0005730 nucleolus; GO:0005737 cytoplasm; GO:0031974 membrane-enclosed lumen; GO:0031981 nuclear lumen; GO:0043226 organelle; GO:0043227 membrane-bounded organelle; GO:0043228 non-membrane-bounded organelle; GO:0043229 intracellular organelle; GO:0043231 intracellular membrane-bounded organelle; GO:0043232 in…	GO:0003682 chromatin binding; GO:0003824 catalytic activity; GO:0004842 ubiquitin-protein transferase activity; GO:0005488 binding; GO:0005515 protein binding; GO:0016740 transferase activity; GO:0019787 ubiquitin-like protein transferase activity; GO:0019899 enzyme binding; GO:0031625 ubiquitin protein ligase binding; GO:0044389 ubiquitin-like protein ligase binding; GO:0061630 ubiquitin protein…	PF00179	Ubiquitin-conjugating enzyme	O	KOG0417	Ubiquitin-protein ligase
Q9NRZ9	Lymphoid-specific helicase OS=Homo sapiens OX=9606 GN=HELLS PE=1 SV=1	HELLS	0.505	0.00482774	Down	97.073	6.8	5	5	5	5	5	4	4	3	3	3	2	1	1.27794	1.40399	1.12781	0.964067	0.838969	1.10386	0.609356	0.674016		cytoplasm	K19001			GO:0001655 urogenital system development; GO:0001775 cell activation; GO:0002376 immune system process; GO:0002520 immune system development; GO:0002521 leukocyte differentiation; GO:0006139 nucleobase-containing compound metabolic process; GO:0006259 DNA metabolic process; GO:0006304 DNA modification; GO:0006305 DNA alkylation; GO:0006306 DNA methylation; GO:0006323 DNA packaging; GO:0006325 chr…	GO:0000775 chromosome, centromeric region; GO:0000785 chromatin; GO:0000792 heterochromatin; GO:0005622 intracellular; GO:0005623 cell; GO:0005634 nucleus; GO:0005694 chromosome; GO:0005721 pericentric heterochromatin; GO:0043226 organelle; GO:0043227 membrane-bounded organelle; GO:0043228 non-membrane-bounded organelle; GO:0043229 intracellular organelle; GO:0043231 intracellular membrane-bounde…	GO:0003682 chromatin binding; GO:0005488 binding;			K	KOG0385	Chromatin remodeling complex WSTF-ISWI, small subunit
Q9NUQ2	1-acyl-sn-glycerol-3-phosphate acyltransferase epsilon OS=Homo sapiens OX=9606 GN=AGPAT5 PE=1 SV=3	AGPAT5	0.547	0.00175989	Down	42.072	19.8	5	5	5	5	5	5	5	4	4	4	2	3	1.45504	1.24709	1.25188	1.13694	0.949947	0.795648	0.641218	0.799253	0.722989	mitochondria	K19007	AGPAT5; lysophosphatidiate acyltransferase [EC:2.3.1.51]	hsa04072 Phospholipase D signaling pathway; hsa00561 Glycerolipid metabolism; hsa00564 Glycerophospholipid metabolism; hsa01100 Metabolic pathways	GO:0002244 hematopoietic progenitor cell differentiation; GO:0002376 immune system process; GO:0002520 immune system development; GO:0006629 lipid metabolic process; GO:0006638 neutral lipid metabolic process; GO:0006639 acylglycerol metabolic process; GO:0006644 phospholipid metabolic process; GO:0006650 glycerophospholipid metabolic process; GO:0006654 phosphatidic acid biosynthetic process; GO…	GO:0005622 intracellular; GO:0005623 cell; GO:0005737 cytoplasm; GO:0005739 mitochondrion; GO:0005740 mitochondrial envelope; GO:0005741 mitochondrial outer membrane; GO:0005783 endoplasmic reticulum; GO:0005789 endoplasmic reticulum membrane; GO:0012505 endomembrane system; GO:0016020 membrane; GO:0019867 outer membrane; GO:0031090 organelle membrane; GO:0031966 mitochondrial membrane; GO:003196…	GO:0003824 catalytic activity; GO:0003841 1-acylglycerol-3-phosphate O-acyltransferase activity; GO:0008374 O-acyltransferase activity; GO:0016411 acylglycerol O-acyltransferase activity; GO:0016740 transferase activity; GO:0016746 transferase activity, transferring acyl groups; GO:0016747 transferase activity, transferring acyl groups other than amino-acyl groups; GO:0042171 lysophosphatidic aci…			I	KOG1505	Lysophosphatidic acid acyltransferase LPAAT and related acyltransferases
Q9NVP2	Histone chaperone ASF1B OS=Homo sapiens OX=9606 GN=ASF1B PE=1 SV=1	ASF1B	0.481	0.000110231	Down	22.433	45	6	5	6	6	6	6	5	5	5	6	4	5	1.42482	1.45066	1.37786	0.942102	0.712267	1.04845	0.65645	0.642613	0.744781	extracellular	K10753			GO:0006323 DNA packaging; GO:0006325 chromatin organization; GO:0006333 chromatin assembly or disassembly; GO:0006334 nucleosome assembly; GO:0006335 DNA replication-dependent nucleosome assembly; GO:0006336 DNA replication-independent nucleosome assembly; GO:0006996 organelle organization; GO:0009987 cellular process; GO:0016043 cellular component organization; GO:0022607 cellular component asse…	GO:0000228 nuclear chromosome; GO:0000785 chromatin; GO:0000790 nuclear chromatin; GO:0005622 intracellular; GO:0005623 cell; GO:0005634 nucleus; GO:0005654 nucleoplasm; GO:0005694 chromosome; GO:0031974 membrane-enclosed lumen; GO:0031981 nuclear lumen; GO:0032991 protein-containing complex; GO:0043226 organelle; GO:0043227 membrane-bounded organelle; GO:0043228 non-membrane-bounded organelle; G…	GO:0005488 binding; GO:0005515 protein binding; GO:0042393 histone binding;			B	KOG3265	Histone chaperone involved in gene silencing
Q9NXV2	BTB/POZ domain-containing protein KCTD5 OS=Homo sapiens OX=9606 GN=KCTD5 PE=1 SV=1	KCTD5	0.595	0.00227514	Down	26.092	20.9	3	3	3	3	3	2	1	1	3	2	2	1	1.22803	1.12016	1.10084	1.12882	1.1806	1.1906	0.777624	0.647577	0.625743	cytoplasm	K21914			GO:0006508 proteolysis; GO:0006511 ubiquitin-dependent protein catabolic process; GO:0006807 nitrogen compound metabolic process; GO:0008152 metabolic process; GO:0009056 catabolic process; GO:0009057 macromolecule catabolic process; GO:0009987 cellular process; GO:0010498 proteasomal protein catabolic process; GO:0019538 protein metabolic process; GO:0019941 modification-dependent protein catabo…	GO:0000151 ubiquitin ligase complex; GO:0005622 intracellular; GO:0005623 cell; GO:0005634 nucleus; GO:0005737 cytoplasm; GO:0005829 cytosol; GO:0031461 cullin-RING ubiquitin ligase complex; GO:0031463 Cul3-RING ubiquitin ligase complex; GO:0032991 protein-containing complex; GO:0043226 organelle; GO:0043227 membrane-bounded organelle; GO:0043229 intracellular organelle; GO:0043231 intracellular …	GO:0005488 binding; GO:0005515 protein binding; GO:0042802 identical protein binding; GO:0044877 protein-containing complex binding; GO:0097602 cullin family protein binding;	PF02214	K+ channel tetramerisation domain	S	KOG2715	Uncharacterized conserved protein, contains BTB/POZ domain
Q9ULR0	Pre-mRNA-splicing factor ISY1 homolog OS=Homo sapiens OX=9606 GN=ISY1 PE=1 SV=3	ISY1	0.581	0.0165863	Down	32.992	16.1	3	3	3	2	2	2	2	3	2	3	3	3	1.40217	1.18567	1.29915	1.18105	0.898235	0.775781	0.594639	0.938647	0.724656	nucleus	K12870	ISY1; pre-mRNA-splicing factor ISY1	hsa03040 Spliceosome	GO:0000245 spliceosomal complex assembly; GO:0000350 generation of catalytic spliceosome for second transesterification step; GO:0000375 RNA splicing, via transesterification reactions; GO:0000377 RNA splicing, via transesterification reactions with bulged adenosine as nucleophile; GO:0000389 mRNA 3'-splice site recognition; GO:0000393 spliceosomal conformational changes to generate catalytic con…	GO:0000974 Prp19 complex; GO:0005622 intracellular; GO:0005623 cell; GO:0005634 nucleus; GO:0005654 nucleoplasm; GO:0005681 spliceosomal complex; GO:0031974 membrane-enclosed lumen; GO:0031981 nuclear lumen; GO:0032991 protein-containing complex; GO:0043226 organelle; GO:0043227 membrane-bounded organelle; GO:0043229 intracellular organelle; GO:0043231 intracellular membrane-bounded organelle; GO…				A	KOG3068	mRNA splicing factor
Q9Y2D8	Afadin- and alpha-actinin-binding protein OS=Homo sapiens OX=9606 GN=SSX2IP PE=1 SV=3	SSX2IP	0.631	0.0257086	Down	71.235	9.3	5	5	5	4	4	5	3	2	4	3	3	2	0.981898	1.44089	1.36635	1.02383	1.00709	0.788673	0.875777	0.747241	0.768253	nucleus	K06085	SSX2IP; synovial sarcoma, X breakpoint 2 interacting protein	hsa04520 Adherens junction	GO:0000226 microtubule cytoskeleton organization; GO:0006810 transport; GO:0006928 movement of cell or subcellular component; GO:0006996 organelle organization; GO:0007010 cytoskeleton organization; GO:0007017 microtubule-based process; GO:0007018 microtubule-based movement; GO:0007049 cell cycle; GO:0007098 centrosome cycle; GO:0009987 cellular process; GO:0010970 transport along microtubule; GO…	GO:0005622 intracellular; GO:0005623 cell; GO:0005737 cytoplasm; GO:0005813 centrosome; GO:0005815 microtubule organizing center; GO:0005856 cytoskeleton; GO:0005929 cilium; GO:0015630 microtubule cytoskeleton; GO:0032991 protein-containing complex; GO:0034451 centriolar satellite; GO:0036064 ciliary basal body; GO:0042995 cell projection; GO:0043226 organelle; GO:0043228 non-membrane-bounded org…
Q9Y4C2	TRPM8 channel-associated factor 1 OS=Homo sapiens OX=9606 GN=TCAF1 PE=1 SV=3	TCAF1	0.367	0.000327918	Down	102.12	19.5	15	15	15	12	14	11	12	10	9	4	9	7	1.50657	1.43934	1.42847	1.12682	0.93657	0.956762	0.585663	0.447321	0.572487	cytoplasm,nucleus				GO:0010359 regulation of anion channel activity; GO:0022898 regulation of transmembrane transporter activity; GO:0030334 regulation of cell migration; GO:0030336 negative regulation of cell migration; GO:0032386 regulation of intracellular transport; GO:0032388 positive regulation of intracellular transport; GO:0032409 regulation of transporter activity; GO:0032411 positive regulation of transpor…	GO:0005623 cell; GO:0005886 plasma membrane; GO:0016020 membrane; GO:0071944 cell periphery;	GO:0005488 binding; GO:0005515 protein binding; GO:0044325 ion channel binding;	PF13402	Peptidase M60-like family
Q9Y4U1	Cyanocobalamin reductase / alkylcobalamin dealkylase OS=Homo sapiens OX=9606 GN=MMACHC PE=1 SV=3	MMACHC	0.335	0.00353649	Down	31.728	24.8	5	5	5	3	5	3	4	4	3	1	2	2	1.78116	1.31647	1.3973	1.09339	0.676066	0.730363		0.469294	0.535962	cytoplasm,nucleus	K14618	MMACHC; cyanocobalamin reductase (cyanide-eliminating) / alkylcobalamin dealkylase [EC:1.16.1.6 2.5.1.151]	hsa04977 Vitamin digestion and absorption	GO:0006518 peptide metabolic process; GO:0006575 cellular modified amino acid metabolic process; GO:0006725 cellular aromatic compound metabolic process; GO:0006749 glutathione metabolic process; GO:0006766 vitamin metabolic process; GO:0006767 water-soluble vitamin metabolic process; GO:0006790 sulfur compound metabolic process; GO:0006807 nitrogen compound metabolic process; GO:0008152 metaboli…	GO:0005622 intracellular; GO:0005623 cell; GO:0005737 cytoplasm; GO:0005829 cytosol;	GO:0000166 nucleotide binding; GO:0003824 catalytic activity; GO:0005488 binding; GO:0005515 protein binding; GO:0016491 oxidoreductase activity; GO:0016722 oxidoreductase activity, oxidizing metal ions; GO:0016723 oxidoreductase activity, oxidizing metal ions, NAD or NADP as acceptor; GO:0032451 demethylase activity; GO:0033218 amide binding; GO:0033787 cyanocobalamin reductase (cyanide-eliminat…			C	KOG4552	Vitamin-D-receptor interacting protein complex component
O00257	E3 SUMO-protein ligase CBX4 OS=Homo sapiens OX=9606 GN=CBX4 PE=1 SV=3	CBX4	1.605	0.00186404	Up	61.367	28.4	11	11	11	6	5	6	7	7	7	8	10	8	0.726384	0.797603	0.86034	0.947976	0.935433	0.905945	1.31891	1.16996	1.33745	nucleus	K11452			GO:0000122 negative regulation of transcription by RNA polymerase II; GO:0006355 regulation of transcription, DNA-templated; GO:0006357 regulation of transcription by RNA polymerase II; GO:0006464 cellular protein modification process; GO:0006807 nitrogen compound metabolic process; GO:0008152 metabolic process; GO:0009889 regulation of biosynthetic process; GO:0009890 negative regulation of bios…	GO:0000151 ubiquitin ligase complex; GO:0000152 nuclear ubiquitin ligase complex; GO:0005622 intracellular; GO:0005623 cell; GO:0005634 nucleus; GO:0005654 nucleoplasm; GO:0016604 nuclear body; GO:0031519 PcG protein complex; GO:0031974 membrane-enclosed lumen; GO:0031981 nuclear lumen; GO:0032991 protein-containing complex; GO:0035102 PRC1 complex; GO:0043226 organelle; GO:0043227 membrane-bound…	GO:0001067 regulatory region nucleic acid binding; GO:0003676 nucleic acid binding; GO:0003677 DNA binding; GO:0003682 chromatin binding; GO:0003712 transcription coregulator activity; GO:0003714 transcription corepressor activity; GO:0003723 RNA binding; GO:0003727 single-stranded RNA binding; GO:0003824 catalytic activity; GO:0005488 binding; GO:0005515 protein binding; GO:0016740 transferase a…	PF00385	Chromo (CHRromatin Organisation MOdifier) domain	B	KOG2748	Uncharacterized conserved protein, contains chromo domain
O00391	Sulfhydryl oxidase 1 OS=Homo sapiens OX=9606 GN=QSOX1 PE=1 SV=3	QSOX1	1.613	0.00684934	Up	82.577	14.6	8	8	8	2	4	3	6	4	4	6	5	7	0.727186	0.920747	0.71476	0.774123	0.820379	1.23203	1.19351	1.38972	1.22754	Golgi apparatus	K10758			GO:0001775 cell activation; GO:0002252 immune effector process; GO:0002263 cell activation involved in immune response; GO:0002274 myeloid leukocyte activation; GO:0002275 myeloid cell activation involved in immune response; GO:0002283 neutrophil activation involved in immune response; GO:0002366 leukocyte activation involved in immune response; GO:0002376 immune system process; GO:0002443 leukoc…	GO:0000139 Golgi membrane; GO:0005576 extracellular region; GO:0005615 extracellular space; GO:0005622 intracellular; GO:0005623 cell; GO:0005737 cytoplasm; GO:0005783 endoplasmic reticulum; GO:0005788 endoplasmic reticulum lumen; GO:0005794 Golgi apparatus; GO:0012505 endomembrane system; GO:0016020 membrane; GO:0016021 integral component of membrane; GO:0030141 secretory granule; GO:0030173 int…	GO:0003756 protein disulfide isomerase activity; GO:0003824 catalytic activity; GO:0016491 oxidoreductase activity; GO:0016667 oxidoreductase activity, acting on a sulfur group of donors; GO:0016670 oxidoreductase activity, acting on a sulfur group of donors, oxygen as acceptor; GO:0016853 isomerase activity; GO:0016860 intramolecular oxidoreductase activity; GO:0016864 intramolecular oxidoreduct…	PF00085	Thioredoxin	D	KOG1731	FAD-dependent sulfhydryl oxidase/quiescin and related proteins
O14896	Interferon regulatory factor 6 OS=Homo sapiens OX=9606 GN=IRF6 PE=1 SV=1	IRF6	1.712	0.000249083	Up	53.129	10.3	4	4	4	3	4	4	3	3	3	4	4	4	0.714086	0.810054	0.769608	0.889544	0.875961	1.01368	1.36243	1.31017	1.25446	mitochondria	K10154			GO:0002376 immune system process; GO:0006139 nucleobase-containing compound metabolic process; GO:0006351 transcription, DNA-templated; GO:0006355 regulation of transcription, DNA-templated; GO:0006357 regulation of transcription by RNA polymerase II; GO:0006366 transcription by RNA polymerase II; GO:0006725 cellular aromatic compound metabolic process; GO:0006807 nitrogen compound metabolic proc…	GO:0005622 intracellular; GO:0005623 cell; GO:0005634 nucleus; GO:0005737 cytoplasm; GO:0005829 cytosol; GO:0030054 cell junction; GO:0043226 organelle; GO:0043227 membrane-bounded organelle; GO:0043229 intracellular organelle; GO:0043231 intracellular membrane-bounded organelle;	GO:0000981 DNA-binding transcription factor activity, RNA polymerase II-specific; GO:0001228 DNA-binding transcription activator activity, RNA polymerase II-specific; GO:0003676 nucleic acid binding; GO:0003677 DNA binding; GO:0003700 DNA-binding transcription factor activity; GO:0005488 binding; GO:0043565 sequence-specific DNA binding; GO:0097159 organic cyclic compound binding; GO:0140110 tran…	PF00605	Interferon regulatory factor transcription factor
O76080	AN1-type zinc finger protein 5 OS=Homo sapiens OX=9606 GN=ZFAND5 PE=1 SV=1	ZFAND5	1.544	0.00736345	Up	23.132	12.2	2	2	2	2	2	2	2	2	2	2	2	2	0.895693	0.937023	0.733671	0.687673	0.771951	1.01153	1.21532	1.41444	1.33271	nucleus	K24687			GO:0001501 skeletal system development; GO:0001667 ameboidal-type cell migration; GO:0001701 in utero embryonic development; GO:0001944 vasculature development; GO:0003008 system process; GO:0003016 respiratory system process; GO:0006928 movement of cell or subcellular component; GO:0007154 cell communication; GO:0007165 signal transduction; GO:0007166 cell surface receptor signaling pathway; GO:…					S	KOG3173	Predicted Zn-finger protein
P00395	Cytochrome c oxidase subunit 1 OS=Homo sapiens OX=9606 GN=MT-CO1 PE=1 SV=1	MT-CO1	1.738	0.0146961	Up	57.041	13.6	4	4	4	4	3	4	4	3	4	3	3	4	0.796865	0.865394	0.558172	0.629638	0.646641	1.6448	1.23489	1.36897	1.25464	plasma membrane	K02256	COX1; cytochrome c oxidase subunit 1 [EC:7.1.1.9]	hsa04932 Non-alcoholic fatty liver disease; hsa05208 Chemical carcinogenesis - reactive oxygen species; hsa05016 Huntington disease; hsa00190 Oxidative phosphorylation; hsa05415 Diabetic cardiomyopathy; hsa05012 Parkinson disease; hsa05010 Alzheimer disease; hsa04260 Cardiac muscle contraction; hsa04714 Thermogenesis; hsa05022 Pathways of neurodegeneration - multiple diseases; hsa05014 Amyotrophi…	GO:0006091 generation of precursor metabolites and energy; GO:0006119 oxidative phosphorylation; GO:0006123 mitochondrial electron transport, cytochrome c to oxygen; GO:0006139 nucleobase-containing compound metabolic process; GO:0006163 purine nucleotide metabolic process; GO:0006725 cellular aromatic compound metabolic process; GO:0006753 nucleoside phosphate metabolic process; GO:0006793 phosp…	GO:0005622 intracellular; GO:0005623 cell; GO:0005737 cytoplasm; GO:0005739 mitochondrion; GO:0005740 mitochondrial envelope; GO:0005743 mitochondrial inner membrane; GO:0005746 mitochondrial respirasome; GO:0005750 mitochondrial respiratory chain complex III; GO:0005751 mitochondrial respiratory chain complex IV; GO:0016020 membrane; GO:0019866 organelle inner membrane; GO:0031090 organelle memb…	GO:0003824 catalytic activity; GO:0004129 cytochrome-c oxidase activity; GO:0005215 transporter activity; GO:0008324 cation transmembrane transporter activity; GO:0009055 electron transfer activity; GO:0015002 heme-copper terminal oxidase activity; GO:0015075 ion transmembrane transporter activity; GO:0015077 monovalent inorganic cation transmembrane transporter activity; GO:0015078 proton transm…			C	KOG4769	Cytochrome c oxidase, subunit I
P06454	Prothymosin alpha OS=Homo sapiens OX=9606 GN=PTMA PE=1 SV=2	PTMA	1.525	0.0130476	Up	12.203	25.2	3	3	3	3	3	3	3	3	3	3	3	3	0.965469	0.790219	0.786788	0.569323	1.21754	0.793538	1.18589	1.48483	1.20639	cytoplasm	K13784			GO:0006355 regulation of transcription, DNA-templated; GO:0006357 regulation of transcription by RNA polymerase II; GO:0008283 cell population proliferation; GO:0009889 regulation of biosynthetic process; GO:0009891 positive regulation of biosynthetic process; GO:0009892 negative regulation of metabolic process; GO:0009893 positive regulation of metabolic process; GO:0009987 cellular process; GO:…	GO:0005622 intracellular; GO:0005623 cell; GO:0005634 nucleus; GO:0043226 organelle; GO:0043227 membrane-bounded organelle; GO:0043229 intracellular organelle; GO:0043231 intracellular membrane-bounded organelle;
P07602	Prosaposin OS=Homo sapiens OX=9606 GN=PSAP PE=1 SV=2	PSAP	1.769	0.00333148	Up	58.112	31.1	14	14	14	6	8	9	9	7	12	12	13	12	0.722257	0.622393	0.840001	0.889937	0.998405	1.06327	1.30255	1.21159	1.3496	plasma membrane	K12382	PSAP; saposin	hsa04142 Lysosome; hsa00600 Sphingolipid metabolism	GO:0000003 reproduction; GO:0001655 urogenital system development; GO:0001775 cell activation; GO:0001932 regulation of protein phosphorylation; GO:0001934 positive regulation of protein phosphorylation; GO:0002252 immune effector process; GO:0002263 cell activation involved in immune response; GO:0002274 myeloid leukocyte activation; GO:0002275 myeloid cell activation involved in immune response…	GO:0000323 lytic vacuole; GO:0005576 extracellular region; GO:0005615 extracellular space; GO:0005622 intracellular; GO:0005623 cell; GO:0005737 cytoplasm; GO:0005764 lysosome; GO:0005765 lysosomal membrane; GO:0005766 primary lysosome; GO:0005773 vacuole; GO:0005774 vacuolar membrane; GO:0005775 vacuolar lumen; GO:0005886 plasma membrane; GO:0012505 endomembrane system; GO:0012506 vesicle membra…	GO:0001664 G protein-coupled receptor binding; GO:0003824 catalytic activity; GO:0004553 hydrolase activity, hydrolyzing O-glycosyl compounds; GO:0004565 beta-galactosidase activity; GO:0005102 signaling receptor binding; GO:0005488 binding; GO:0005515 protein binding; GO:0005543 phospholipid binding; GO:0008047 enzyme activator activity; GO:0008289 lipid binding; GO:0015925 galactosidase activit…	PF05184	Saposin-like type B, region 1	GI	KOG1340	Prosaposin
P14209	CD99 antigen OS=Homo sapiens OX=9606 GN=CD99 PE=1 SV=1	CD99	2.177	0.000146425	Up	18.848	29.7	3	3	3	3	3	3	3	3	3	3	3	3	0.628807	0.63612	0.60012	0.835456	0.92289	1.31696	1.36692	1.46637	1.22636	extracellular	K06520	CD99; CD99 antigen	hsa04670 Leukocyte transendothelial migration; hsa04514 Cell adhesion molecules	GO:0002682 regulation of immune system process; GO:0048583 regulation of response to stimulus; GO:0050776 regulation of immune response; GO:0050789 regulation of biological process; GO:0065007 biological regulation;	GO:0005622 intracellular; GO:0005623 cell; GO:0005737 cytoplasm; GO:0005886 plasma membrane; GO:0005887 integral component of plasma membrane; GO:0016020 membrane; GO:0016021 integral component of membrane; GO:0031224 intrinsic component of membrane; GO:0031226 intrinsic component of plasma membrane; GO:0071944 cell periphery;
P17029	Zinc finger protein with KRAB and SCAN domains 1 OS=Homo sapiens OX=9606 GN=ZKSCAN1 PE=1 SV=3	ZKSCAN1	1.512	0.00152565	Up	63.629	13.7	5	5	5	3	4	4	4	4	4	4	5	5	0.772111	0.763535	0.872166	0.962571	0.795874	1.19263	1.29309	1.16158	1.18645	nucleus	K09229			GO:0006355 regulation of transcription, DNA-templated; GO:0006357 regulation of transcription by RNA polymerase II; GO:0009889 regulation of biosynthetic process; GO:0010468 regulation of gene expression; GO:0010556 regulation of macromolecule biosynthetic process; GO:0019219 regulation of nucleobase-containing compound metabolic process; GO:0019222 regulation of metabolic process; GO:0031323 reg…	GO:0005622 intracellular; GO:0005623 cell; GO:0005634 nucleus; GO:0043226 organelle; GO:0043227 membrane-bounded organelle; GO:0043229 intracellular organelle; GO:0043231 intracellular membrane-bounded organelle;	GO:0000981 DNA-binding transcription factor activity, RNA polymerase II-specific; GO:0003700 DNA-binding transcription factor activity; GO:0140110 transcription regulator activity;	PF02023; PF00096	SCAN domain; Zinc finger, C2H2 type	K	KOG1721	FOG: Zn-finger
P32929	Cystathionine gamma-lyase OS=Homo sapiens OX=9606 GN=CTH PE=1 SV=3	CTH	1.695	4.63922e-05	Up	44.508	35.1	11	11	11	8	10	9	11	11	11	11	11	11	0.80157	0.742321	0.785224	0.831195	0.904935	0.987183	1.35356	1.28075	1.31326	cytoplasm	K01758	CTH; cystathionine gamma-lyase [EC:4.4.1.1]	hsa00450 Selenocompound metabolism; hsa00260 Glycine, serine and threonine metabolism; hsa00270 Cysteine and methionine metabolism; hsa01230 Biosynthesis of amino acids; hsa01100 Metabolic pathways	GO:0000096 sulfur amino acid metabolic process; GO:0000097 sulfur amino acid biosynthetic process; GO:0000098 sulfur amino acid catabolic process; GO:0001558 regulation of cell growth; GO:0006082 organic acid metabolic process; GO:0006355 regulation of transcription, DNA-templated; GO:0006464 cellular protein modification process; GO:0006518 peptide metabolic process; GO:0006520 cellular amino ac…	GO:0005622 intracellular; GO:0005623 cell; GO:0005737 cytoplasm; GO:0005829 cytosol;	GO:0003824 catalytic activity; GO:0003962 cystathionine gamma-synthase activity; GO:0004121 cystathionine beta-lyase activity; GO:0004123 cystathionine gamma-lyase activity; GO:0005488 binding; GO:0005515 protein binding; GO:0008144 drug binding; GO:0016740 transferase activity; GO:0016765 transferase activity, transferring alkyl or aryl (other than methyl) groups; GO:0016829 lyase activity; GO:0…	PF01053	Cys/Met metabolism PLP-dependent enzyme	E	KOG0053	Cystathionine beta-lyases/cystathionine gamma-synthases
P78540	Arginase-2, mitochondrial OS=Homo sapiens OX=9606 GN=ARG2 PE=1 SV=1	ARG2	1.602	0.00269918	Up	38.577	35.9	8	8	8	4	4	6	6	6	7	5	5	6	0.758868	0.752837	0.617633	1.10687	1.19983	1.15301	1.17912	1.1476	1.08424	mitochondria	K01476	E3.5.3.1; arginase [EC:3.5.3.1]	hsa05146 Amoebiasis; hsa00220 Arginine biosynthesis; hsa01230 Biosynthesis of amino acids; hsa00330 Arginine and proline metabolism; hsa01100 Metabolic pathways	GO:0000003 reproduction; GO:0000050 urea cycle; GO:0001101 response to acid chemical; GO:0001505 regulation of neurotransmitter levels; GO:0001655 urogenital system development; GO:0001657 ureteric bud development; GO:0001666 response to hypoxia; GO:0001817 regulation of cytokine production; GO:0001818 negative regulation of cytokine production; GO:0001822 kidney development; GO:0001823 mesonephr…	GO:0005622 intracellular; GO:0005623 cell; GO:0005737 cytoplasm; GO:0005739 mitochondrion; GO:0005759 mitochondrial matrix; GO:0031974 membrane-enclosed lumen; GO:0043226 organelle; GO:0043227 membrane-bounded organelle; GO:0043229 intracellular organelle; GO:0043231 intracellular membrane-bounded organelle; GO:0043233 organelle lumen; GO:0070013 intracellular organelle lumen;	GO:0003824 catalytic activity; GO:0004053 arginase activity; GO:0005488 binding; GO:0005515 protein binding; GO:0016787 hydrolase activity; GO:0016810 hydrolase activity, acting on carbon-nitrogen (but not peptide) bonds; GO:0016813 hydrolase activity, acting on carbon-nitrogen (but not peptide) bonds, in linear amidines; GO:0019899 enzyme binding; GO:0050998 nitric-oxide synthase binding;	PF00491	Arginase family	E	KOG2965	Arginase
Q12986	Transcriptional repressor NF-X1 OS=Homo sapiens OX=9606 GN=NFX1 PE=1 SV=2	NFX1	1.571	0.00155821	Up	124.39	5.7	5	5	5	3	4	3	3	3	1	3	5	4	0.783926	0.761258	0.879864	0.807936	0.956439		1.28634	1.17811	1.34613	nucleus	K12236	NFX1; transcriptional repressor NF-X1	hsa05165 Human papillomavirus infection	GO:0000122 negative regulation of transcription by RNA polymerase II; GO:0006139 nucleobase-containing compound metabolic process; GO:0006351 transcription, DNA-templated; GO:0006355 regulation of transcription, DNA-templated; GO:0006357 regulation of transcription by RNA polymerase II; GO:0006366 transcription by RNA polymerase II; GO:0006725 cellular aromatic compound metabolic process; GO:0006…	GO:0005622 intracellular; GO:0005623 cell; GO:0005634 nucleus; GO:0005730 nucleolus; GO:0005737 cytoplasm; GO:0005829 cytosol; GO:0005886 plasma membrane; GO:0016020 membrane; GO:0031974 membrane-enclosed lumen; GO:0031981 nuclear lumen; GO:0043226 organelle; GO:0043227 membrane-bounded organelle; GO:0043228 non-membrane-bounded organelle; GO:0043229 intracellular organelle; GO:0043231 intracellu…	GO:0000976 transcription regulatory region sequence-specific DNA binding; GO:0000977 RNA polymerase II transcription regulatory region sequence-specific DNA binding; GO:0000981 DNA-binding transcription factor activity, RNA polymerase II-specific; GO:0001067 regulatory region nucleic acid binding; GO:0001227 DNA-binding transcription repressor activity, RNA polymerase II-specific; GO:0003676 nucl…	PF01424	R3H domain	K	KOG1952	Transcription factor NF-X1, contains NFX-type Zn2+-binding and R3H domains
Q15390	Mitochondrial fission regulator 1 OS=Homo sapiens OX=9606 GN=MTFR1 PE=1 SV=2	MTFR1	1.97	0.000473161	Up	37	12	3	3	3	1	3	3	3	2	3	3	3	2		0.638769	0.688666	0.852885	1.01598	0.881922	1.26534	1.36592	1.29051	mitochondria				GO:0000266 mitochondrial fission; GO:0006091 generation of precursor metabolites and energy; GO:0006996 organelle organization; GO:0007005 mitochondrion organization; GO:0008152 metabolic process; GO:0009060 aerobic respiration; GO:0009987 cellular process; GO:0015980 energy derivation by oxidation of organic compounds; GO:0016043 cellular component organization; GO:0044237 cellular metabolic pro…	GO:0005622 intracellular; GO:0005623 cell; GO:0005737 cytoplasm; GO:0005739 mitochondrion; GO:0005829 cytosol; GO:0005886 plasma membrane; GO:0016020 membrane; GO:0043226 organelle; GO:0043227 membrane-bounded organelle; GO:0043229 intracellular organelle; GO:0043231 intracellular membrane-bounded organelle; GO:0071944 cell periphery;
Q3V6T2	Girdin OS=Homo sapiens OX=9606 GN=CCDC88A PE=1 SV=2	CCDC88A	1.665	0.0146602	Up	216.04	1.9	3	3	3	2	2	2	3	2	1	2	2	2	0.80222	0.741177	0.852336	0.650001	0.964297		1.18335	1.64802	1.1586	nucleus				GO:0000226 microtubule cytoskeleton organization; GO:0001932 regulation of protein phosphorylation; GO:0001934 positive regulation of protein phosphorylation; GO:0006275 regulation of DNA replication; GO:0006810 transport; GO:0006928 movement of cell or subcellular component; GO:0006996 organelle organization; GO:0007010 cytoskeleton organization; GO:0007017 microtubule-based process; GO:0007154 …	GO:0005622 intracellular; GO:0005623 cell; GO:0005737 cytoplasm; GO:0005783 endoplasmic reticulum; GO:0005794 Golgi apparatus; GO:0005813 centrosome; GO:0005814 centriole; GO:0005815 microtubule organizing center; GO:0005829 cytosol; GO:0005856 cytoskeleton; GO:0005886 plasma membrane; GO:0005929 cilium; GO:0012505 endomembrane system; GO:0015630 microtubule cytoskeleton; GO:0016020 membrane; GO:…	GO:0003779 actin binding; GO:0005488 binding; GO:0005515 protein binding; GO:0005543 phospholipid binding; GO:0008017 microtubule binding; GO:0008092 cytoskeletal protein binding; GO:0008289 lipid binding; GO:0015631 tubulin binding; GO:0019899 enzyme binding; GO:0019900 kinase binding; GO:0019901 protein kinase binding; GO:0035091 phosphatidylinositol binding; GO:0042802 identical protein bindin…			S	KOG4643	Uncharacterized coiled-coil protein
Q53EL6	Programmed cell death protein 4 OS=Homo sapiens OX=9606 GN=PDCD4 PE=1 SV=2	PDCD4	1.516	0.00030444	Up	51.735	43.7	15	15	15	14	13	14	12	13	13	13	13	14	0.814451	0.778441	0.862922	0.933074	0.973778	0.914591	1.25709	1.27175	1.19391	nucleus	K16865	PDCD4; programmed cell death protein 4	hsa05205 Proteoglycans in cancer; hsa05206 MicroRNAs in cancer	GO:0001817 regulation of cytokine production; GO:0001818 negative regulation of cytokine production; GO:0001837 epithelial to mesenchymal transition; GO:0001932 regulation of protein phosphorylation; GO:0001933 negative regulation of protein phosphorylation; GO:0002237 response to molecule of bacterial origin; GO:0003007 heart morphogenesis; GO:0006355 regulation of transcription, DNA-templated; …	GO:0005622 intracellular; GO:0005623 cell; GO:0005634 nucleus; GO:0005737 cytoplasm; GO:0005829 cytosol; GO:0043226 organelle; GO:0043227 membrane-bounded organelle; GO:0043229 intracellular organelle; GO:0043231 intracellular membrane-bounded organelle;				K	KOG0403	Neoplastic transformation suppressor Pdcd4/MA-3, contains MA3 domain
Q5T3J3	Ligand-dependent nuclear receptor-interacting factor 1 OS=Homo sapiens OX=9606 GN=LRIF1 PE=1 SV=1	LRIF1	1.843	0.0147053	Up	84.567	7.3	5	5	5	3	3	2	3	2	4	3	4	3	0.756501	0.823902	0.574349	1.14731	0.8409	0.886169	1.36953	1.52216	1.07918	nucleus	K23220				GO:0005622 intracellular; GO:0005623 cell; GO:0005634 nucleus; GO:0005815 microtubule organizing center; GO:0005856 cytoskeleton; GO:0015630 microtubule cytoskeleton; GO:0043226 organelle; GO:0043227 membrane-bounded organelle; GO:0043228 non-membrane-bounded organelle; GO:0043229 intracellular organelle; GO:0043231 intracellular membrane-bounded organelle; GO:0043232 intracellular non-membrane-b…
Q6P1L5	Protein FAM117B OS=Homo sapiens OX=9606 GN=FAM117B PE=1 SV=2	FAM117B	1.52	0.00592091	Up	61.967	7.3	3	3	3	1	2	2	2	2	3	3	2	2		0.737608	0.782157	0.887572	0.926427	1.20012	1.11519	1.25553	1.09541	mitochondria
Q76FK4	Nucleolar protein 8 OS=Homo sapiens OX=9606 GN=NOL8 PE=1 SV=1	NOL8	1.572	5.3582e-05	Up	131.61	9	8	8	8	4	4	3	4	3	3	4	6	7	0.771674	0.796408	0.790182	0.898472	0.885953	1.15095	1.24478	1.18269	1.2789	nucleus	K14836			GO:0006139 nucleobase-containing compound metabolic process; GO:0006364 rRNA processing; GO:0006396 RNA processing; GO:0006725 cellular aromatic compound metabolic process; GO:0006807 nitrogen compound metabolic process; GO:0008104 protein localization; GO:0008152 metabolic process; GO:0009987 cellular process; GO:0010033 response to organic substance; GO:0010467 gene expression; GO:0016070 RNA m…	GO:0005622 intracellular; GO:0005623 cell; GO:0005634 nucleus; GO:0005730 nucleolus; GO:0031974 membrane-enclosed lumen; GO:0031981 nuclear lumen; GO:0043226 organelle; GO:0043227 membrane-bounded organelle; GO:0043228 non-membrane-bounded organelle; GO:0043229 intracellular organelle; GO:0043231 intracellular membrane-bounded organelle; GO:0043232 intracellular non-membrane-bounded organelle; GO…		PF00076	RNA recognition motif. (a.k.a. RRM, RBD, or RNP domain)	A	KOG4365	Uncharacterized conserved protein
Q7Z7K0	COX assembly mitochondrial protein homolog OS=Homo sapiens OX=9606 GN=CMC1 PE=1 SV=1	CMC1	1.511	0.0453763	Up	12.49	35.8	4	4	4	3	2	1	3	3	3	3	3	3	0.734013	0.900433		0.81807	0.716658	1.12685	1.23704	1.07168	1.39525	extracellular	K18171				GO:0005622 intracellular; GO:0005623 cell; GO:0005737 cytoplasm; GO:0005739 mitochondrion; GO:0043226 organelle; GO:0043227 membrane-bounded organelle; GO:0043229 intracellular organelle; GO:0043231 intracellular membrane-bounded organelle;				S	KOG4624	Uncharacterized conserved protein
Q86SQ4	Adhesion G-protein coupled receptor G6 OS=Homo sapiens OX=9606 GN=ADGRG6 PE=1 SV=3	ADGRG6	1.715	0.00853191	Up	136.69	3.8	3	3	3	3	2	1	2	3	3	2	2	3	0.781024	0.767501		0.655882	0.814391	0.998444	1.46318	1.35434	1.16524	plasma membrane	K08463			GO:0003007 heart morphogenesis; GO:0003205 cardiac chamber development; GO:0003206 cardiac chamber morphogenesis; GO:0006996 organelle organization; GO:0007005 mitochondrion organization; GO:0007154 cell communication; GO:0007165 signal transduction; GO:0007166 cell surface receptor signaling pathway; GO:0007186 G protein-coupled receptor signaling pathway; GO:0007187 G protein-coupled receptor s…	GO:0005622 intracellular; GO:0005623 cell; GO:0005737 cytoplasm; GO:0005886 plasma membrane; GO:0009986 cell surface; GO:0016020 membrane; GO:0016021 integral component of membrane; GO:0031224 intrinsic component of membrane; GO:0071944 cell periphery;	GO:0004888 transmembrane signaling receptor activity; GO:0004930 G protein-coupled receptor activity; GO:0005488 binding; GO:0005515 protein binding; GO:0005518 collagen binding; GO:0038023 signaling receptor activity; GO:0043236 laminin binding; GO:0044877 protein-containing complex binding; GO:0050840 extracellular matrix binding; GO:0060089 molecular transducer activity;	PF00431; PF00354	CUB domain; Pentaxin family	T	KOG4193	G protein-coupled receptors
Q86XP1	Diacylglycerol kinase eta OS=Homo sapiens OX=9606 GN=DGKH PE=1 SV=1	DGKH	1.895	0.0453272	Up	134.86	9.8	7	7	7	5	3	3	3	6	4	6	7	7	0.454048	1.01866	0.628692	1.03255	1.02817	0.856013	1.24453	1.26403	1.47331	cytoplasm	K00901	dgkA; diacylglycerol kinase (ATP) [EC:2.7.1.107]	hsa05231 Choline metabolism in cancer; hsa04070 Phosphatidylinositol signaling system; hsa04072 Phospholipase D signaling pathway; hsa00561 Glycerolipid metabolism; hsa00564 Glycerophospholipid metabolism; hsa01100 Metabolic pathways	GO:0001775 cell activation; GO:0006629 lipid metabolic process; GO:0006644 phospholipid metabolic process; GO:0006650 glycerophospholipid metabolic process; GO:0006793 phosphorus metabolic process; GO:0006796 phosphate-containing compound metabolic process; GO:0006950 response to stress; GO:0007154 cell communication; GO:0007165 signal transduction; GO:0007186 G protein-coupled receptor signaling…	GO:0005622 intracellular; GO:0005623 cell; GO:0005737 cytoplasm; GO:0005768 endosome; GO:0005886 plasma membrane; GO:0012505 endomembrane system; GO:0016020 membrane; GO:0031410 cytoplasmic vesicle; GO:0031982 vesicle; GO:0043226 organelle; GO:0043227 membrane-bounded organelle; GO:0043229 intracellular organelle; GO:0071944 cell periphery; GO:0097708 intracellular vesicle;	GO:0003824 catalytic activity; GO:0004143 diacylglycerol kinase activity; GO:0016301 kinase activity; GO:0016740 transferase activity; GO:0016772 transferase activity, transferring phosphorus-containing groups; GO:0016773 phosphotransferase activity, alcohol group as acceptor;	PF00169; PF00130; PF07647	PH domain; Phorbol esters/diacylglycerol binding domain (C1 domain); SAM domain (Sterile alpha motif)	F	KOG1170	Diacylglycerol kinase
Q8N4Q1	Mitochondrial intermembrane space import and assembly protein 40 OS=Homo sapiens OX=9606 GN=CHCHD4 PE=1 SV=1	CHCHD4	1.828	4.80695e-06	Up	15.996	51.4	9	9	9	4	5	7	5	5	8	8	8	8	0.747406	0.729282	0.710109	0.800545	0.806155	1.20834	1.35623	1.30821	1.33373	extracellular	K17782			GO:0006457 protein folding; GO:0006458 'de novo' protein folding; GO:0006464 cellular protein modification process; GO:0006605 protein targeting; GO:0006626 protein targeting to mitochondrion; GO:0006807 nitrogen compound metabolic process; GO:0006810 transport; GO:0006839 mitochondrial transport; GO:0006886 intracellular protein transport; GO:0006996 organelle organization; GO:0007005 mitochondr…	GO:0005622 intracellular; GO:0005623 cell; GO:0005737 cytoplasm; GO:0005739 mitochondrion; GO:0005740 mitochondrial envelope; GO:0005758 mitochondrial intermembrane space; GO:0031967 organelle envelope; GO:0031970 organelle envelope lumen; GO:0031974 membrane-enclosed lumen; GO:0031975 envelope; GO:0043226 organelle; GO:0043227 membrane-bounded organelle; GO:0043229 intracellular organelle; GO:00…	GO:0003824 catalytic activity; GO:0015035 protein disulfide oxidoreductase activity; GO:0015036 disulfide oxidoreductase activity; GO:0016491 oxidoreductase activity; GO:0016667 oxidoreductase activity, acting on a sulfur group of donors;	PF06747	CHCH domain	S	KOG4149	Uncharacterized conserved protein
Q8NFQ8	Torsin-1A-interacting protein 2 OS=Homo sapiens OX=9606 GN=TOR1AIP2 PE=1 SV=1	TOR1AIP2	1.544	0.00129681	Up	51.263	32.3	11	10	10	8	7	7	8	6	8	6	6	5	0.706377	0.813365	0.692027	0.947645	1.21768	1.20762	1.15291	1.09576	1.16662	cytoplasm	K23001			GO:0006996 organelle organization; GO:0007029 endoplasmic reticulum organization; GO:0008104 protein localization; GO:0009987 cellular process; GO:0010256 endomembrane system organization; GO:0016043 cellular component organization; GO:0032781 positive regulation of ATPase activity; GO:0033036 macromolecule localization; GO:0033365 protein localization to organelle; GO:0034504 protein localizatio…	GO:0005622 intracellular; GO:0005623 cell; GO:0005634 nucleus; GO:0005635 nuclear envelope; GO:0005737 cytoplasm; GO:0005783 endoplasmic reticulum; GO:0005789 endoplasmic reticulum membrane; GO:0012505 endomembrane system; GO:0016020 membrane; GO:0031090 organelle membrane; GO:0031965 nuclear membrane; GO:0031967 organelle envelope; GO:0031975 envelope; GO:0031984 organelle subcompartment; GO:004…	GO:0001671 ATPase activator activity; GO:0005488 binding; GO:0005515 protein binding; GO:0008047 enzyme activator activity; GO:0019899 enzyme binding; GO:0030234 enzyme regulator activity; GO:0051117 ATPase binding; GO:0060589 nucleoside-triphosphatase regulator activity; GO:0060590 ATPase regulator activity; GO:0098772 molecular function regulator;
Q8NI08	Nuclear receptor coactivator 7 OS=Homo sapiens OX=9606 GN=NCOA7 PE=1 SV=2	NCOA7	1.901	0.00434082	Up	106.16	8.2	5	5	5	2	2	2	4	1	4	3	3	5		0.690367	0.723729	0.7289		0.825185	1.46992	1.37039	1.19151	nucleus	K25442	NCOA7; nuclear receptor coactivator 7	hsa04142 Lysosome	GO:0006355 regulation of transcription, DNA-templated; GO:0006357 regulation of transcription by RNA polymerase II; GO:0009889 regulation of biosynthetic process; GO:0009891 positive regulation of biosynthetic process; GO:0009892 negative regulation of metabolic process; GO:0009893 positive regulation of metabolic process; GO:0010468 regulation of gene expression; GO:0010556 regulation of macromo…	GO:0005622 intracellular; GO:0005623 cell;	GO:0003712 transcription coregulator activity; GO:0003713 transcription coactivator activity; GO:0005102 signaling receptor binding; GO:0005488 binding; GO:0005515 protein binding; GO:0008134 transcription factor binding; GO:0030374 nuclear receptor transcription coactivator activity; GO:0035257 nuclear hormone receptor binding; GO:0051427 hormone receptor binding; GO:0140110 transcription regula…	PF01476; PF07534	LysM domain; TLD	K	KOG2372	Oxidation resistance protein
Q8TCF1	AN1-type zinc finger protein 1 OS=Homo sapiens OX=9606 GN=ZFAND1 PE=1 SV=1	ZFAND1	2.105	0.0025306	Up	30.787	19.8	4	4	4	2	3	4	1	3	3	3	3	3	0.686076	0.71554	0.546231		0.744843	1.20614	1.53488	1.37123	1.19507	extracellular	K24684								S	KOG3183	Predicted Zn-finger protein
Q96KR6	Protein FAM210B, mitochondrial OS=Homo sapiens OX=9606 GN=FAM210B PE=1 SV=2	FAM210B	1.568	0.000575022	Up	20.424	26.6	3	3	3	3	3	3	3	3	2	2	2	2	0.769328	0.754193	0.78675	0.862829	0.904441	1.30035	1.10731	1.23672	1.27809	extracellular				GO:0002682 regulation of immune system process; GO:0002684 positive regulation of immune system process; GO:0009719 response to endogenous stimulus; GO:0009725 response to hormone; GO:0009987 cellular process; GO:0010033 response to organic substance; GO:0014070 response to organic cyclic compound; GO:0032355 response to estradiol; GO:0032870 cellular response to hormone stimulus; GO:0033993 resp…	GO:0005622 intracellular; GO:0005623 cell; GO:0005737 cytoplasm; GO:0005739 mitochondrion; GO:0005740 mitochondrial envelope; GO:0005741 mitochondrial outer membrane; GO:0016020 membrane; GO:0019867 outer membrane; GO:0031090 organelle membrane; GO:0031224 intrinsic component of membrane; GO:0031966 mitochondrial membrane; GO:0031967 organelle envelope; GO:0031968 organelle outer membrane; GO:003…				S	KOG4526	Predicted membrane protein
Q96LA8	Protein arginine N-methyltransferase 6 OS=Homo sapiens OX=9606 GN=PRMT6 PE=1 SV=1	PRMT6	1.548	0.0246755	Up	41.937	13.6	4	4	4	3	4	2	4	4	4	4	3	3	0.636575	0.95039	0.747782	1.00861	0.940722	1.10185	1.17229	1.11386	1.32792	nucleus	K11437			GO:0000122 negative regulation of transcription by RNA polymerase II; GO:0002682 regulation of immune system process; GO:0006139 nucleobase-containing compound metabolic process; GO:0006259 DNA metabolic process; GO:0006281 DNA repair; GO:0006284 base-excision repair; GO:0006325 chromatin organization; GO:0006355 regulation of transcription, DNA-templated; GO:0006357 regulation of transcription b…	GO:0005622 intracellular; GO:0005623 cell; GO:0005634 nucleus; GO:0005654 nucleoplasm; GO:0005730 nucleolus; GO:0005737 cytoplasm; GO:0005829 cytosol; GO:0031974 membrane-enclosed lumen; GO:0031981 nuclear lumen; GO:0043226 organelle; GO:0043227 membrane-bounded organelle; GO:0043228 non-membrane-bounded organelle; GO:0043229 intracellular organelle; GO:0043231 intracellular membrane-bounded orga…	GO:0003682 chromatin binding; GO:0003824 catalytic activity; GO:0005488 binding; GO:0005515 protein binding; GO:0008168 methyltransferase activity; GO:0008170 N-methyltransferase activity; GO:0008276 protein methyltransferase activity; GO:0008469 histone-arginine N-methyltransferase activity; GO:0008757 S-adenosylmethionine-dependent methyltransferase activity; GO:0016273 arginine N-methyltransfe…	PF13649	Methyltransferase domain	KOT	KOG1499	Protein arginine N-methyltransferase PRMT1 and related enzymes
Q96PC5	Melanoma inhibitory activity protein 2 OS=Homo sapiens OX=9606 GN=MIA2 PE=1 SV=4	MIA2	1.512	7.39898e-06	Up	159.83	17.6	22	15	22	19	21	18	20	20	20	20	21	20	0.820942	0.820536	0.836596	0.880895	0.91509	0.979284	1.27896	1.23922	1.22848	peroxisome	K23703			GO:0006810 transport; GO:0006886 intracellular protein transport; GO:0006888 endoplasmic reticulum to Golgi vesicle-mediated transport; GO:0008104 protein localization; GO:0009987 cellular process; GO:0015031 protein transport; GO:0015833 peptide transport; GO:0016043 cellular component organization; GO:0016192 vesicle-mediated transport; GO:0022607 cellular component assembly; GO:0032527 protein…	GO:0005622 intracellular; GO:0005623 cell; GO:0005737 cytoplasm; GO:0005783 endoplasmic reticulum; GO:0005789 endoplasmic reticulum membrane; GO:0012505 endomembrane system; GO:0016020 membrane; GO:0031984 organelle subcompartment; GO:0042175 nuclear outer membrane-endoplasmic reticulum membrane network; GO:0043226 organelle; GO:0043227 membrane-bounded organelle; GO:0043229 intracellular organel…	GO:0005215 transporter activity; GO:0008047 enzyme activator activity; GO:0030234 enzyme regulator activity; GO:0098772 molecular function regulator;	PF07653	Variant SH3 domain
Q99988	Growth/differentiation factor 15 OS=Homo sapiens OX=9606 GN=GDF15 PE=1 SV=3	GDF15	2.626	1.59334e-06	Up	34.14	57.8	13	13	13	8	7	9	9	9	8	12	13	12	0.634759	0.664938	0.659413	0.620521	0.598835	0.677362	1.67922	1.7716	1.69335	extracellular	K05504	GDF15; growth differentiation factor 15	hsa04060 Cytokine-cytokine receptor interaction	GO:0000187 activation of MAPK activity; GO:0001932 regulation of protein phosphorylation; GO:0001934 positive regulation of protein phosphorylation; GO:0002021 response to dietary excess; GO:0002023 reduction of food intake in response to dietary excess; GO:0006355 regulation of transcription, DNA-templated; GO:0006357 regulation of transcription by RNA polymerase II; GO:0007154 cell communicatio…	GO:0005576 extracellular region; GO:0005615 extracellular space; GO:0005622 intracellular; GO:0005623 cell; GO:0005634 nucleus; GO:0005737 cytoplasm; GO:0005794 Golgi apparatus; GO:0012505 endomembrane system; GO:0043226 organelle; GO:0043227 membrane-bounded organelle; GO:0043229 intracellular organelle; GO:0043231 intracellular membrane-bounded organelle;	GO:0005102 signaling receptor binding; GO:0005125 cytokine activity; GO:0005126 cytokine receptor binding; GO:0005160 transforming growth factor beta receptor binding; GO:0005488 binding; GO:0005515 protein binding; GO:0030545 receptor regulator activity; GO:0042802 identical protein binding; GO:0042803 protein homodimerization activity; GO:0046983 protein dimerization activity; GO:0048018 recept…	PF00019	Transforming growth factor beta like domain	T	KOG3900	Transforming growth factor beta, bone morphogenetic protein and related proteins
Q9BVK2	Probable dolichyl pyrophosphate Glc1Man9GlcNAc2 alpha-1,3-glucosyltransferase OS=Homo sapiens OX=9606 GN=ALG8 PE=1 SV=2	ALG8	1.604	0.0188168	Up	60.087	10.8	4	4	4	4	4	4	4	4	4	4	3	4	1.02032	0.747321	0.717381	0.58857	0.953776	0.986009	1.30431	1.2042	1.47811	plasma membrane	K03849	ALG8; alpha-1,3-glucosyltransferase [EC:2.4.1.265]	hsa00510 N-Glycan biosynthesis; hsa01100 Metabolic pathways	GO:0006464 cellular protein modification process; GO:0006486 protein glycosylation; GO:0006487 protein N-linked glycosylation; GO:0006488 dolichol-linked oligosaccharide biosynthetic process; GO:0006490 oligosaccharide-lipid intermediate biosynthetic process; GO:0006629 lipid metabolic process; GO:0006807 nitrogen compound metabolic process; GO:0008152 metabolic process; GO:0009058 biosynthetic p…	GO:0005622 intracellular; GO:0005623 cell; GO:0005737 cytoplasm; GO:0005783 endoplasmic reticulum; GO:0005789 endoplasmic reticulum membrane; GO:0012505 endomembrane system; GO:0016020 membrane; GO:0031984 organelle subcompartment; GO:0042175 nuclear outer membrane-endoplasmic reticulum membrane network; GO:0043226 organelle; GO:0043227 membrane-bounded organelle; GO:0043229 intracellular organel…	GO:0000030 mannosyltransferase activity; GO:0000033 alpha-1,3-mannosyltransferase activity; GO:0003824 catalytic activity; GO:0004583 dolichyl-phosphate-glucose-glycolipid alpha-glucosyltransferase activity; GO:0016740 transferase activity; GO:0016757 transferase activity, transferring glycosyl groups; GO:0016758 transferase activity, transferring hexosyl groups; GO:0042281 dolichyl pyrophosphate…			G	KOG2576	Glucosyltransferase - Alg8p
Q9H1E3	Nuclear ubiquitous casein and cyclin-dependent kinase substrate 1 OS=Homo sapiens OX=9606 GN=NUCKS1 PE=1 SV=1	NUCKS1	1.868	0.00483596	Up	27.296	11.5	2	2	2	2	2	2	2	2	2	2	2	2	0.768202	0.590951	0.791726	0.587712	1.18255	1.06104	1.19032	1.47016	1.35734	nucleus				GO:0000724 double-strand break repair via homologous recombination; GO:0000725 recombinational repair; GO:0001678 cellular glucose homeostasis; GO:0006139 nucleobase-containing compound metabolic process; GO:0006259 DNA metabolic process; GO:0006260 DNA replication; GO:0006261 DNA-dependent DNA replication; GO:0006275 regulation of DNA replication; GO:0006281 DNA repair; GO:0006302 double-strand …	GO:0000228 nuclear chromosome; GO:0000785 chromatin; GO:0000790 nuclear chromatin; GO:0005622 intracellular; GO:0005623 cell; GO:0005634 nucleus; GO:0005694 chromosome; GO:0005730 nucleolus; GO:0005737 cytoplasm; GO:0031974 membrane-enclosed lumen; GO:0031981 nuclear lumen; GO:0043226 organelle; GO:0043227 membrane-bounded organelle; GO:0043228 non-membrane-bounded organelle; GO:0043229 intracell…	GO:0000981 DNA-binding transcription factor activity, RNA polymerase II-specific; GO:0001228 DNA-binding transcription activator activity, RNA polymerase II-specific; GO:0003676 nucleic acid binding; GO:0003677 DNA binding; GO:0003682 chromatin binding; GO:0003690 double-stranded DNA binding; GO:0003697 single-stranded DNA binding; GO:0003700 DNA-binding transcription factor activity; GO:0005488 …
Q9H3H5	UDP-N-acetylglucosamine--dolichyl-phosphate N-acetylglucosaminephosphotransferase OS=Homo sapiens OX=9606 GN=DPAGT1 PE=1 SV=2	DPAGT1	2.049	0.0136168	Up	46.089	4.7	2	2	2	2	2	2	1	2	1	1	2	2	0.646186	0.861569	0.652172		0.889429			1.3464	1.60425	plasma membrane	K01001	ALG7; UDP-N-acetylglucosamine--dolichyl-phosphate N-acetylglucosaminephosphotransferase [EC:2.7.8.15]	hsa00510 N-Glycan biosynthesis; hsa01100 Metabolic pathways	GO:0006040 amino sugar metabolic process; GO:0006047 UDP-N-acetylglucosamine metabolic process; GO:0006066 alcohol metabolic process; GO:0006139 nucleobase-containing compound metabolic process; GO:0006464 cellular protein modification process; GO:0006486 protein glycosylation; GO:0006487 protein N-linked glycosylation; GO:0006488 dolichol-linked oligosaccharide biosynthetic process; GO:0006489 d…	GO:0005622 intracellular; GO:0005623 cell; GO:0005737 cytoplasm; GO:0005783 endoplasmic reticulum; GO:0005789 endoplasmic reticulum membrane; GO:0012505 endomembrane system; GO:0016020 membrane; GO:0016021 integral component of membrane; GO:0030176 integral component of endoplasmic reticulum membrane; GO:0031224 intrinsic component of membrane; GO:0031227 intrinsic component of endoplasmic reticu…	GO:0003824 catalytic activity; GO:0003975 UDP-N-acetylglucosamine-dolichyl-phosphate N-acetylglucosaminephosphotransferase activity; GO:0003976 UDP-N-acetylglucosamine-lysosomal-enzyme N-acetylglucosaminephosphotransferase activity; GO:0016740 transferase activity; GO:0016772 transferase activity, transferring phosphorus-containing groups; GO:0016780 phosphotransferase activity, for other substit…			G	KOG2788	Glycosyltransferase
Q9NVV5	Androgen-induced gene 1 protein OS=Homo sapiens OX=9606 GN=AIG1 PE=1 SV=3	AIG1	2.241	0.00268467	Up	27.458	10.5	3	3	3	3	3	3	2	3	3	2	3	3	0.639219	0.897425	0.685316		0.594754	0.2028	1.83892	1.67671	1.46485	plasma membrane				GO:0001676 long-chain fatty acid metabolic process; GO:0006082 organic acid metabolic process; GO:0006629 lipid metabolic process; GO:0006631 fatty acid metabolic process; GO:0008152 metabolic process; GO:0009056 catabolic process; GO:0009062 fatty acid catabolic process; GO:0009987 cellular process; GO:0016042 lipid catabolic process; GO:0016054 organic acid catabolic process; GO:0019752 carboxy…	GO:0005623 cell; GO:0012505 endomembrane system; GO:0016020 membrane;	GO:0003824 catalytic activity; GO:0016787 hydrolase activity;			W	KOG3989	Beta-2-glycoprotein I
	LN1=DHT 5nM treated group
	LN2=DHT 5nM + ARV-110 5 uM treated group
	LN3=DHT 5nM + Z15 5 uM treated group
