# Supplementary material for: Selective androgen receptor degrader (SARD) to overcome antiandrogen resistance in castration-resistant prostate cancer
Source: eLife journal article supplement (doi:10.7554/elife.70700), 2023-01-19
Supplement: data2 [file Figure 2-figure supplement 2C.xlsx]

## Sheet: Up
KEGG pathway	Mapping	Background	All Mapping	All Background	Fold Enrichment	Fisher's exact test p value	-log10(p value)	Related proteins
hsa00100 Steroid biosynthesis	2	14	5	2913	83.23	0.000212792	3.67	P37268 Q14534

## Sheet: Up Pathway2Protein
KEGG pathway	Fisher's exact test p value	Fold Enrichment	Protein accession	Protein description	Gene name	LN2/LN1 Ratio	LN2/LN1 P value	Regulated Type	MW [kDa]	Coverage [%]	KEGG KO No.	Peptides	Unique peptides	Razor + unique peptides	Razor + unique peptides LN1_1	Razor + unique peptides LN1_2	Razor + unique peptides LN1_3	Razor + unique peptides LN2_1	Razor + unique peptides LN2_2	Razor + unique peptides LN2_3	Razor + unique peptides LN3_1	Razor + unique peptides LN3_2	Razor + unique peptides LN3_3	LN1_1	LN1_2	LN1_3	LN2_1	LN2_2	LN2_3	LN3_1	LN3_2	LN3_3
hsa00100 Steroid biosynthesis	0.000212792	83.23	P37268	Squalene synthase OS=Homo sapiens OX=9606 GN=FDFT1 PE=1 SV=1	FDFT1	1.87	5.81259e-05	Up	48.115	49.6	K00801	17	17	17	11	14	13	17	14	16	10	11	10	0.87077	0.838653	0.794868	1.56367	1.62157	1.49719	0.61656	0.626824	0.569888
hsa00100 Steroid biosynthesis	0.000212792	83.23	Q14534	Squalene monooxygenase OS=Homo sapiens OX=9606 GN=SQLE PE=1 SV=3	SQLE	2.298	0.0012551	Up	63.922	20.2	K00511	7	7	7	4	5	6	7	6	5	4	3	3	0.662041	0.900571	0.67336	1.6365	1.80259	1.69996	0.597576	0.465277	0.562125

## Sheet: Down
KEGG pathway	Mapping	Background	All Mapping	All Background	Fold Enrichment	Fisher's exact test p value	-log10(p value)	Related proteins
hsa05215 Prostate cancer	4	46	18	2913	14.07	0.000141777	3.85	O15393 P07288 P10275 Q99801
hsa04114 Oocyte meiosis	3	63	18	2913	7.71	0.00624054	2.2	O14965 P10275 Q12834
hsa00983 Drug metabolism - other enzymes	2	33	18	2913	9.81	0.0170042	1.77	P18440 P31350
hsa04115 p53 signaling pathway	2	33	18	2913	9.81	0.0170042	1.77	P31350 Q9NYZ3

## Sheet: Down Pathway2Protein
KEGG pathway	Fisher's exact test p value	Fold Enrichment	Protein accession	Protein description	Gene name	LN2/LN1 Ratio	LN2/LN1 P value	Regulated Type	MW [kDa]	Coverage [%]	KEGG KO No.	Peptides	Unique peptides	Razor + unique peptides	Razor + unique peptides LN1_1	Razor + unique peptides LN1_2	Razor + unique peptides LN1_3	Razor + unique peptides LN2_1	Razor + unique peptides LN2_2	Razor + unique peptides LN2_3	Razor + unique peptides LN3_1	Razor + unique peptides LN3_2	Razor + unique peptides LN3_3	LN1_1	LN1_2	LN1_3	LN2_1	LN2_2	LN2_3	LN3_1	LN3_2	LN3_3
hsa00983 Drug metabolism - other enzymes	0.0170042	9.81	P18440	Arylamine N-acetyltransferase 1 OS=Homo sapiens OX=9606 GN=NAT1 PE=1 SV=2	NAT1	0.584	0.00159209	Down	33.898	23.4	K00622	6	6	6	4	4	6	5	5	4	5	4	3	1.37553	1.25997	1.58708	0.789784	0.83534	0.83997	0.835569	0.859804	0.616955
hsa00983 Drug metabolism - other enzymes	0.0170042	9.81	P31350	Ribonucleoside-diphosphate reductase subunit M2 OS=Homo sapiens OX=9606 GN=RRM2 PE=1 SV=1	RRM2	0.646	8.28323e-06	Down	44.877	52.4	K10808	16	14	16	16	16	16	15	15	16	15	16	14	1.36368	1.40252	1.37503	0.908651	0.870594	0.894686	0.712635	0.732689	0.739515
hsa04114 Oocyte meiosis	0.00624054	7.71	O14965	Aurora kinase A OS=Homo sapiens OX=9606 GN=AURKA PE=1 SV=2	AURKA	0.551	0.00880712	Down	45.809	14.6	K11481	5	4	4	4	4	3	3	1	2	2	3	3	1.48329	1.44646	1.1718	0.75239		0.755603	0.546565	0.900047	0.943849
hsa04114 Oocyte meiosis	0.00624054	7.71	P10275	Androgen receptor OS=Homo sapiens OX=9606 GN=AR PE=1 SV=3	AR	0.205	1.38689e-07	Down	99.187	20.7	K08557	13	13	13	11	10	11	5	3	6	7	8	8	1.83927	1.92893	1.95195	0.386869	0.391948	0.396525	0.679154	0.712578	0.712768
hsa04114 Oocyte meiosis	0.00624054	7.71	Q12834	Cell division cycle protein 20 homolog OS=Homo sapiens OX=9606 GN=CDC20 PE=1 SV=2	CDC20	0.474	0.000299672	Down	54.722	11.4	K03363	4	4	4	4	4	4	2	3	4	3	2	2	1.44538	1.55813	1.72781	0.782438	0.76511	0.694273	0.614149	0.787197	0.625516
hsa04115 p53 signaling pathway	0.0170042	9.81	P31350	Ribonucleoside-diphosphate reductase subunit M2 OS=Homo sapiens OX=9606 GN=RRM2 PE=1 SV=1	RRM2	0.646	8.28323e-06	Down	44.877	52.4	K10808	16	14	16	16	16	16	15	15	16	15	16	14	1.36368	1.40252	1.37503	0.908651	0.870594	0.894686	0.712635	0.732689	0.739515
hsa04115 p53 signaling pathway	0.0170042	9.81	Q9NYZ3	G2 and S phase-expressed protein 1 OS=Homo sapiens OX=9606 GN=GTSE1 PE=1 SV=3	GTSE1	0.656	0.0162753	Down	76.644	14.7	K10129	6	6	6	6	5	6	4	5	5	5	4	4	1.20815	1.36042	1.26816	0.798735	0.710173	1.00683	0.815082	0.943871	0.888575
hsa05010 Alzheimer disease	0.392469	1.49	P48729	Casein kinase I isoform alpha OS=Homo sapiens OX=9606 GN=CSNK1A1 PE=1 SV=2	CSNK1A1	0.612	2.50649e-05	Down	38.914	47.5	K08957	13	13	13	11	13	11	10	10	9	10	11	11	1.2102	1.27514	1.24359	0.784713	0.755062	0.742462	1.01733	1.01291	0.958599
hsa05010 Alzheimer disease	0.392469	1.49	Q13433	Zinc transporter ZIP6 OS=Homo sapiens OX=9606 GN=SLC39A6 PE=1 SV=3	SLC39A6	0.446	0.0334988	Down	85.046	2.9	K14712	2	2	2	2	1	2	2	2	0	1	1	2	1.42178		1.2187	0.512086	0.666356				1.18107
hsa05200 Pathways in cancer	0.0745198	3	P07288	Prostate-specific antigen OS=Homo sapiens OX=9606 GN=KLK3 PE=1 SV=2	KLK3	0.573	2.94783e-05	Down	28.741	58.2	K01351	8	8	8	8	7	8	7	7	7	6	5	6	1.50031	1.4379	1.54386	0.8581	0.879157	0.831074	0.677109	0.637946	0.634547
hsa05200 Pathways in cancer	0.0745198	3	P10275	Androgen receptor OS=Homo sapiens OX=9606 GN=AR PE=1 SV=3	AR	0.205	1.38689e-07	Down	99.187	20.7	K08557	13	13	13	11	10	11	5	3	6	7	8	8	1.83927	1.92893	1.95195	0.386869	0.391948	0.396525	0.679154	0.712578	0.712768
hsa05200 Pathways in cancer	0.0745198	3	Q99801	Homeobox protein Nkx-3.1 OS=Homo sapiens OX=9606 GN=NKX3-1 PE=1 SV=2	NKX3-1	0.534	0.00173733	Down	26.35	22.2	K09348	3	3	3	3	3	3	3	3	3	2	1	1	1.45019	1.4732	1.31422	0.795973	0.823701	0.644117	0.498596
hsa05215 Prostate cancer	0.000141777	14.07	O15393	Transmembrane protease serine 2 OS=Homo sapiens OX=9606 GN=TMPRSS2 PE=1 SV=3	TMPRSS2	0.661	0.000386601	Down	53.859	19.7	K09633	7	7	7	6	7	6	7	6	6	6	6	6	1.32519	1.34388	1.36349	0.830259	0.89266	0.94275	0.747521	0.787689	0.766559
hsa05215 Prostate cancer	0.000141777	14.07	P07288	Prostate-specific antigen OS=Homo sapiens OX=9606 GN=KLK3 PE=1 SV=2	KLK3	0.573	2.94783e-05	Down	28.741	58.2	K01351	8	8	8	8	7	8	7	7	7	6	5	6	1.50031	1.4379	1.54386	0.8581	0.879157	0.831074	0.677109	0.637946	0.634547
hsa05215 Prostate cancer	0.000141777	14.07	P10275	Androgen receptor OS=Homo sapiens OX=9606 GN=AR PE=1 SV=3	AR	0.205	1.38689e-07	Down	99.187	20.7	K08557	13	13	13	11	10	11	5	3	6	7	8	8	1.83927	1.92893	1.95195	0.386869	0.391948	0.396525	0.679154	0.712578	0.712768
hsa05215 Prostate cancer	0.000141777	14.07	Q99801	Homeobox protein Nkx-3.1 OS=Homo sapiens OX=9606 GN=NKX3-1 PE=1 SV=2	NKX3-1	0.534	0.00173733	Down	26.35	22.2	K09348	3	3	3	3	3	3	3	3	3	2	1	1	1.45019	1.4732	1.31422	0.795973	0.823701	0.644117	0.498596

## Sheet: all
KEGG pathway	Mapping	Background	All Mapping	All Background	Fold Enrichment	Fisher's exact test p value	-log10(p value)	Related proteins
hsa05215 Prostate cancer	4	46	23	2913	11.01	0.000387198	3.41	O15393 P07288 P10275 Q99801
hsa00100 Steroid biosynthesis	2	14	23	2913	18.09	0.00512371	2.29	P37268 Q14534
hsa04114 Oocyte meiosis	3	63	23	2913	6.03	0.0125424	1.9	O14965 P10275 Q12834
hsa00983 Drug metabolism - other enzymes	2	33	23	2913	7.68	0.0271455	1.57	P18440 P31350
hsa04115 p53 signaling pathway	2	33	23	2913	7.68	0.0271455	1.57	P31350 Q9NYZ3

## Sheet: all Pathway2Protein
KEGG pathway	Fisher's exact test p value	Fold Enrichment	Protein accession	Protein description	Gene name	LN2/LN1 Ratio	LN2/LN1 P value	Regulated Type	MW [kDa]	Coverage [%]	KEGG KO No.	Peptides	Unique peptides	Razor + unique peptides	Razor + unique peptides LN1_1	Razor + unique peptides LN1_2	Razor + unique peptides LN1_3	Razor + unique peptides LN2_1	Razor + unique peptides LN2_2	Razor + unique peptides LN2_3	Razor + unique peptides LN3_1	Razor + unique peptides LN3_2	Razor + unique peptides LN3_3	LN1_1	LN1_2	LN1_3	LN2_1	LN2_2	LN2_3	LN3_1	LN3_2	LN3_3
hsa00100 Steroid biosynthesis	0.00512371	18.09	P37268	Squalene synthase OS=Homo sapiens OX=9606 GN=FDFT1 PE=1 SV=1	FDFT1	1.87	5.81259e-05	Up	48.115	49.6	K00801	17	17	17	11	14	13	17	14	16	10	11	10	0.87077	0.838653	0.794868	1.56367	1.62157	1.49719	0.61656	0.626824	0.569888
hsa00100 Steroid biosynthesis	0.00512371	18.09	Q14534	Squalene monooxygenase OS=Homo sapiens OX=9606 GN=SQLE PE=1 SV=3	SQLE	2.298	0.0012551	Up	63.922	20.2	K00511	7	7	7	4	5	6	7	6	5	4	3	3	0.662041	0.900571	0.67336	1.6365	1.80259	1.69996	0.597576	0.465277	0.562125
hsa00983 Drug metabolism - other enzymes	0.0271455	7.68	P18440	Arylamine N-acetyltransferase 1 OS=Homo sapiens OX=9606 GN=NAT1 PE=1 SV=2	NAT1	0.584	0.00159209	Down	33.898	23.4	K00622	6	6	6	4	4	6	5	5	4	5	4	3	1.37553	1.25997	1.58708	0.789784	0.83534	0.83997	0.835569	0.859804	0.616955
hsa00983 Drug metabolism - other enzymes	0.0271455	7.68	P31350	Ribonucleoside-diphosphate reductase subunit M2 OS=Homo sapiens OX=9606 GN=RRM2 PE=1 SV=1	RRM2	0.646	8.28323e-06	Down	44.877	52.4	K10808	16	14	16	16	16	16	15	15	16	15	16	14	1.36368	1.40252	1.37503	0.908651	0.870594	0.894686	0.712635	0.732689	0.739515
hsa04114 Oocyte meiosis	0.0125424	6.03	O14965	Aurora kinase A OS=Homo sapiens OX=9606 GN=AURKA PE=1 SV=2	AURKA	0.551	0.00880712	Down	45.809	14.6	K11481	5	4	4	4	4	3	3	1	2	2	3	3	1.48329	1.44646	1.1718	0.75239		0.755603	0.546565	0.900047	0.943849
hsa04114 Oocyte meiosis	0.0125424	6.03	P10275	Androgen receptor OS=Homo sapiens OX=9606 GN=AR PE=1 SV=3	AR	0.205	1.38689e-07	Down	99.187	20.7	K08557	13	13	13	11	10	11	5	3	6	7	8	8	1.83927	1.92893	1.95195	0.386869	0.391948	0.396525	0.679154	0.712578	0.712768
hsa04114 Oocyte meiosis	0.0125424	6.03	Q12834	Cell division cycle protein 20 homolog OS=Homo sapiens OX=9606 GN=CDC20 PE=1 SV=2	CDC20	0.474	0.000299672	Down	54.722	11.4	K03363	4	4	4	4	4	4	2	3	4	3	2	2	1.44538	1.55813	1.72781	0.782438	0.76511	0.694273	0.614149	0.787197	0.625516
hsa04115 p53 signaling pathway	0.0271455	7.68	P31350	Ribonucleoside-diphosphate reductase subunit M2 OS=Homo sapiens OX=9606 GN=RRM2 PE=1 SV=1	RRM2	0.646	8.28323e-06	Down	44.877	52.4	K10808	16	14	16	16	16	16	15	15	16	15	16	14	1.36368	1.40252	1.37503	0.908651	0.870594	0.894686	0.712635	0.732689	0.739515
hsa04115 p53 signaling pathway	0.0271455	7.68	Q9NYZ3	G2 and S phase-expressed protein 1 OS=Homo sapiens OX=9606 GN=GTSE1 PE=1 SV=3	GTSE1	0.656	0.0162753	Down	76.644	14.7	K10129	6	6	6	6	5	6	4	5	5	5	4	4	1.20815	1.36042	1.26816	0.798735	0.710173	1.00683	0.815082	0.943871	0.888575
hsa05166 Human T-cell leukemia virus 1 infection	0.179999	2.58	P36941	Tumor necrosis factor receptor superfamily member 3 OS=Homo sapiens OX=9606 GN=LTBR PE=1 SV=1	LTBR	1.52	0.0183085	Up	46.709	5.7	K03159	2	2	2	2	1	2	1	2	2	2	2	1		0.850439	0.790606	1.32789	1.32459	1.09033	0.806224	0.809925
hsa05166 Human T-cell leukemia virus 1 infection	0.179999	2.58	Q12834	Cell division cycle protein 20 homolog OS=Homo sapiens OX=9606 GN=CDC20 PE=1 SV=2	CDC20	0.474	0.000299672	Down	54.722	11.4	K03363	4	4	4	4	4	4	2	3	4	3	2	2	1.44538	1.55813	1.72781	0.782438	0.76511	0.694273	0.614149	0.787197	0.625516
hsa05200 Pathways in cancer	0.132552	2.35	P07288	Prostate-specific antigen OS=Homo sapiens OX=9606 GN=KLK3 PE=1 SV=2	KLK3	0.573	2.94783e-05	Down	28.741	58.2	K01351	8	8	8	8	7	8	7	7	7	6	5	6	1.50031	1.4379	1.54386	0.8581	0.879157	0.831074	0.677109	0.637946	0.634547
hsa05200 Pathways in cancer	0.132552	2.35	P10275	Androgen receptor OS=Homo sapiens OX=9606 GN=AR PE=1 SV=3	AR	0.205	1.38689e-07	Down	99.187	20.7	K08557	13	13	13	11	10	11	5	3	6	7	8	8	1.83927	1.92893	1.95195	0.386869	0.391948	0.396525	0.679154	0.712578	0.712768
hsa05200 Pathways in cancer	0.132552	2.35	Q99801	Homeobox protein Nkx-3.1 OS=Homo sapiens OX=9606 GN=NKX3-1 PE=1 SV=2	NKX3-1	0.534	0.00173733	Down	26.35	22.2	K09348	3	3	3	3	3	3	3	3	3	2	1	1	1.45019	1.4732	1.31422	0.795973	0.823701	0.644117	0.498596
hsa05203 Viral carcinogenesis	0.203094	2.39	P36941	Tumor necrosis factor receptor superfamily member 3 OS=Homo sapiens OX=9606 GN=LTBR PE=1 SV=1	LTBR	1.52	0.0183085	Up	46.709	5.7	K03159	2	2	2	2	1	2	1	2	2	2	2	1		0.850439	0.790606	1.32789	1.32459	1.09033	0.806224	0.809925
hsa05203 Viral carcinogenesis	0.203094	2.39	Q12834	Cell division cycle protein 20 homolog OS=Homo sapiens OX=9606 GN=CDC20 PE=1 SV=2	CDC20	0.474	0.000299672	Down	54.722	11.4	K03363	4	4	4	4	4	4	2	3	4	3	2	2	1.44538	1.55813	1.72781	0.782438	0.76511	0.694273	0.614149	0.787197	0.625516
hsa05215 Prostate cancer	0.000387198	11.01	O15393	Transmembrane protease serine 2 OS=Homo sapiens OX=9606 GN=TMPRSS2 PE=1 SV=3	TMPRSS2	0.661	0.000386601	Down	53.859	19.7	K09633	7	7	7	6	7	6	7	6	6	6	6	6	1.32519	1.34388	1.36349	0.830259	0.89266	0.94275	0.747521	0.787689	0.766559
hsa05215 Prostate cancer	0.000387198	11.01	P07288	Prostate-specific antigen OS=Homo sapiens OX=9606 GN=KLK3 PE=1 SV=2	KLK3	0.573	2.94783e-05	Down	28.741	58.2	K01351	8	8	8	8	7	8	7	7	7	6	5	6	1.50031	1.4379	1.54386	0.8581	0.879157	0.831074	0.677109	0.637946	0.634547
hsa05215 Prostate cancer	0.000387198	11.01	P10275	Androgen receptor OS=Homo sapiens OX=9606 GN=AR PE=1 SV=3	AR	0.205	1.38689e-07	Down	99.187	20.7	K08557	13	13	13	11	10	11	5	3	6	7	8	8	1.83927	1.92893	1.95195	0.386869	0.391948	0.396525	0.679154	0.712578	0.712768
hsa05215 Prostate cancer	0.000387198	11.01	Q99801	Homeobox protein Nkx-3.1 OS=Homo sapiens OX=9606 GN=NKX3-1 PE=1 SV=2	NKX3-1	0.534	0.00173733	Down	26.35	22.2	K09348	3	3	3	3	3	3	3	3	3	2	1	1	1.45019	1.4732	1.31422	0.795973	0.823701	0.644117	0.498596
