# Supplementary material for: Selective androgen receptor degrader (SARD) to overcome antiandrogen resistance in castration-resistant prostate cancer
Source: eLife journal article supplement (doi:10.7554/elife.70700), 2023-01-19
Supplement: data2 [file Figure 2-figure supplement 2D.xlsx]

## Sheet: Up
KEGG pathway	Mapping	Background	All Mapping	All Background	Fold Enrichment	Fisher's exact test p value	-log10(p value)	Related proteins
hsa00510 N-Glycan biosynthesis	2	32	12	2913	15.17	0.00720552	2.14	Q9BVK2 Q9H3H5
hsa04142 Lysosome	2	80	12	2913	6.07	0.0411316	1.39	P07602 Q8NI08

## Sheet: Up Pathway2Protein
KEGG pathway	Fisher's exact test p value	Fold Enrichment	Protein accession	Protein description	Gene name	LN3/LN1 Ratio	LN3/LN1 P value	Regulated Type	MW [kDa]	Coverage [%]	KEGG KO No.	Peptides	Unique peptides	Razor + unique peptides	Razor + unique peptides LN1_1	Razor + unique peptides LN1_2	Razor + unique peptides LN1_3	Razor + unique peptides LN2_1	Razor + unique peptides LN2_2	Razor + unique peptides LN2_3	Razor + unique peptides LN3_1	Razor + unique peptides LN3_2	Razor + unique peptides LN3_3	LN1_1	LN1_2	LN1_3	LN2_1	LN2_2	LN2_3	LN3_1	LN3_2	LN3_3
hsa00510 N-Glycan biosynthesis	0.00720552	15.17	Q9BVK2	Probable dolichyl pyrophosphate Glc1Man9GlcNAc2 alpha-1,3-glucosyltransferase OS=Homo sapiens OX=9606 GN=ALG8 PE=1 SV=2	ALG8	1.604	0.0188168	Up	60.087	10.8	K03849	4	4	4	4	4	4	4	4	4	4	3	4	1.02032	0.747321	0.717381	0.58857	0.953776	0.986009	1.30431	1.2042	1.47811
hsa00510 N-Glycan biosynthesis	0.00720552	15.17	Q9H3H5	UDP-N-acetylglucosamine--dolichyl-phosphate N-acetylglucosaminephosphotransferase OS=Homo sapiens OX=9606 GN=DPAGT1 PE=1 SV=2	DPAGT1	2.049	0.0136168	Up	46.089	4.7	K01001	2	2	2	2	2	2	1	2	1	1	2	2	0.646186	0.861569	0.652172		0.889429			1.3464	1.60425
hsa04142 Lysosome	0.0411316	6.07	P07602	Prosaposin OS=Homo sapiens OX=9606 GN=PSAP PE=1 SV=2	PSAP	1.769	0.00333148	Up	58.112	31.1	K12382	14	14	14	6	8	9	9	7	12	12	13	12	0.722257	0.622393	0.840001	0.889937	0.998405	1.06327	1.30255	1.21159	1.3496
hsa04142 Lysosome	0.0411316	6.07	Q8NI08	Nuclear receptor coactivator 7 OS=Homo sapiens OX=9606 GN=NCOA7 PE=1 SV=2	NCOA7	1.901	0.00434082	Up	106.16	8.2	K25442	5	5	5	2	2	2	4	1	4	3	3	5		0.690367	0.723729	0.7289		0.825185	1.46992	1.37039	1.19151

## Sheet: Down
KEGG pathway	Mapping	Background	All Mapping	All Background	Fold Enrichment	Fisher's exact test p value	-log10(p value)	Related proteins
hsa04114 Oocyte meiosis	5	63	37	2913	6.25	0.00103058	2.99	O14965 P10275 P36873 P53350 Q12834
hsa00983 Drug metabolism - other enzymes	3	33	37	2913	7.16	0.00792053	2.1	P18440 P31350 Q9HA47
hsa05215 Prostate cancer	3	46	37	2913	5.13	0.0196827	1.71	O15393 P07288 P10275
hsa01040 Biosynthesis of unsaturated fatty acids	2	18	37	2913	8.75	0.021138	1.67	O60427 O95864
hsa04914 Progesterone-mediated oocyte maturation	3	50	37	2913	4.72	0.0245484	1.61	O14965 P53350 Q14807
hsa03320 PPAR signaling pathway	2	25	37	2913	6.3	0.0392095	1.41	O95864 Q01581
hsa05203 Viral carcinogenesis	4	106	37	2913	2.97	0.0435197	1.36	O14757 O15379 P07948 Q12834

## Sheet: Down Pathway2Protein
KEGG pathway	Fisher's exact test p value	Fold Enrichment	Protein accession	Protein description	Gene name	LN3/LN1 Ratio	LN3/LN1 P value	Regulated Type	MW [kDa]	Coverage [%]	KEGG KO No.	Peptides	Unique peptides	Razor + unique peptides	Razor + unique peptides LN1_1	Razor + unique peptides LN1_2	Razor + unique peptides LN1_3	Razor + unique peptides LN2_1	Razor + unique peptides LN2_2	Razor + unique peptides LN2_3	Razor + unique peptides LN3_1	Razor + unique peptides LN3_2	Razor + unique peptides LN3_3	LN1_1	LN1_2	LN1_3	LN2_1	LN2_2	LN2_3	LN3_1	LN3_2	LN3_3
hsa00240 Pyrimidine metabolism	0.0792048	4.26	P31350	Ribonucleoside-diphosphate reductase subunit M2 OS=Homo sapiens OX=9606 GN=RRM2 PE=1 SV=1	RRM2	0.528	1.3336e-06	Down	44.877	52.4	K10808	16	14	16	16	16	16	15	15	16	15	16	14	1.36368	1.40252	1.37503	0.908651	0.870594	0.894686	0.712635	0.732689	0.739515
hsa00240 Pyrimidine metabolism	0.0792048	4.26	Q9HA47	Uridine-cytidine kinase 1 OS=Homo sapiens OX=9606 GN=UCK1 PE=1 SV=1	UCK1	0.599	0.0241048	Down	31.434	19.1	K00876	4	3	3	1	2	2	2	1	3	2	1	2		1.0906	1.2257	1.07902		1.21802	0.654335		0.732323
hsa00983 Drug metabolism - other enzymes	0.00792053	7.16	P18440	Arylamine N-acetyltransferase 1 OS=Homo sapiens OX=9606 GN=NAT1 PE=1 SV=2	NAT1	0.548	0.00839538	Down	33.898	23.4	K00622	6	6	6	4	4	6	5	5	4	5	4	3	1.37553	1.25997	1.58708	0.789784	0.83534	0.83997	0.835569	0.859804	0.616955
hsa00983 Drug metabolism - other enzymes	0.00792053	7.16	P31350	Ribonucleoside-diphosphate reductase subunit M2 OS=Homo sapiens OX=9606 GN=RRM2 PE=1 SV=1	RRM2	0.528	1.3336e-06	Down	44.877	52.4	K10808	16	14	16	16	16	16	15	15	16	15	16	14	1.36368	1.40252	1.37503	0.908651	0.870594	0.894686	0.712635	0.732689	0.739515
hsa00983 Drug metabolism - other enzymes	0.00792053	7.16	Q9HA47	Uridine-cytidine kinase 1 OS=Homo sapiens OX=9606 GN=UCK1 PE=1 SV=1	UCK1	0.599	0.0241048	Down	31.434	19.1	K00876	4	3	3	1	2	2	2	1	3	2	1	2		1.0906	1.2257	1.07902		1.21802	0.654335		0.732323
hsa01040 Biosynthesis of unsaturated fatty acids	0.021138	8.75	O60427	Acyl-CoA (8-3)-desaturase OS=Homo sapiens OX=9606 GN=FADS1 PE=1 SV=3	FADS1	0.635	0.0295117	Down	51.964	23.6	K10224	7	7	7	6	7	4	6	5	4	4	4	3	1.03047	1.57671	1.18792	1.13155	0.806418	0.856478	0.754599	0.874679	0.781179
hsa01040 Biosynthesis of unsaturated fatty acids	0.021138	8.75	O95864	Acyl-CoA 6-desaturase OS=Homo sapiens OX=9606 GN=FADS2 PE=1 SV=1	FADS2	0.479	5.1824e-06	Down	52.259	27.3	K10226	12	12	12	11	10	10	10	11	11	10	10	9	1.3639	1.35145	1.28336	1.00888	1.04881	1.02929	0.643889	0.622885	0.647541
hsa03320 PPAR signaling pathway	0.0392095	6.3	O95864	Acyl-CoA 6-desaturase OS=Homo sapiens OX=9606 GN=FADS2 PE=1 SV=1	FADS2	0.479	5.1824e-06	Down	52.259	27.3	K10226	12	12	12	11	10	10	10	11	11	10	10	9	1.3639	1.35145	1.28336	1.00888	1.04881	1.02929	0.643889	0.622885	0.647541
hsa03320 PPAR signaling pathway	0.0392095	6.3	Q01581	Hydroxymethylglutaryl-CoA synthase, cytoplasmic OS=Homo sapiens OX=9606 GN=HMGCS1 PE=1 SV=2	HMGCS1	0.575	0.000427103	Down	57.293	50.6	K01641	19	18	19	13	14	13	16	16	16	12	12	12	0.991568	0.952667	1.08165	1.40978	1.38455	1.44096	0.593124	0.539823	0.605868
hsa04068 FoxO signaling pathway	0.158042	2.81	P53350	Serine/threonine-protein kinase PLK1 OS=Homo sapiens OX=9606 GN=PLK1 PE=1 SV=1	PLK1	0.636	0.00983387	Down	68.254	18.2	K06631	8	8	8	3	7	6	5	4	4	2	4	2	1.06385	1.46128	1.22	0.879088	0.891197	1.10231	0.780618	0.76352	0.838139
hsa04068 FoxO signaling pathway	0.158042	2.81	Q12983	BCL2/adenovirus E1B 19 kDa protein-interacting protein 3 OS=Homo sapiens OX=9606 GN=BNIP3 PE=1 SV=3	BNIP3	0.631	0.00166764	Down	27.832	13.5	K15464	3	3	3	3	3	3	3	2	3	3	3	3	1.20494	1.30607	1.23513	0.957442	0.955521	0.977368	0.801476	0.856295	0.705771
hsa04110 Cell cycle	0.0660324	3.19	O14757	Serine/threonine-protein kinase Chk1 OS=Homo sapiens OX=9606 GN=CHEK1 PE=1 SV=2	CHEK1	0.567	0.000388115	Down	54.433	11.3	K02216	4	4	4	4	4	4	4	4	4	4	2	2	1.25859	1.29856	1.24595	1.01282	0.912562	1.11596	0.706024	0.662469	0.787071
hsa04110 Cell cycle	0.0660324	3.19	P53350	Serine/threonine-protein kinase PLK1 OS=Homo sapiens OX=9606 GN=PLK1 PE=1 SV=1	PLK1	0.636	0.00983387	Down	68.254	18.2	K06631	8	8	8	3	7	6	5	4	4	2	4	2	1.06385	1.46128	1.22	0.879088	0.891197	1.10231	0.780618	0.76352	0.838139
hsa04110 Cell cycle	0.0660324	3.19	Q12834	Cell division cycle protein 20 homolog OS=Homo sapiens OX=9606 GN=CDC20 PE=1 SV=2	CDC20	0.428	0.000862535	Down	54.722	11.4	K03363	4	4	4	4	4	4	2	3	4	3	2	2	1.44538	1.55813	1.72781	0.782438	0.76511	0.694273	0.614149	0.787197	0.625516
hsa04114 Oocyte meiosis	0.00103058	6.25	O14965	Aurora kinase A OS=Homo sapiens OX=9606 GN=AURKA PE=1 SV=2	AURKA	0.583	0.0414396	Down	45.809	14.6	K11481	5	4	4	4	4	3	3	1	2	2	3	3	1.48329	1.44646	1.1718	0.75239		0.755603	0.546565	0.900047	0.943849
hsa04114 Oocyte meiosis	0.00103058	6.25	P10275	Androgen receptor OS=Homo sapiens OX=9606 GN=AR PE=1 SV=3	AR	0.368	2.06721e-06	Down	99.187	20.7	K08557	13	13	13	11	10	11	5	3	6	7	8	8	1.83927	1.92893	1.95195	0.386869	0.391948	0.396525	0.679154	0.712578	0.712768
hsa04114 Oocyte meiosis	0.00103058	6.25	P36873	Serine/threonine-protein phosphatase PP1-gamma catalytic subunit OS=Homo sapiens OX=9606 GN=PPP1CC PE=1 SV=1	PPP1CC	0.48	0.0092471	Down	36.983	47.7	K06269	16	2	2	2	2	2	2	2	2	2	2	2	1.52618	0.949716	1.35069	1.46534	1.26623	0.604121	0.604658	0.558833	0.674234
hsa04114 Oocyte meiosis	0.00103058	6.25	P53350	Serine/threonine-protein kinase PLK1 OS=Homo sapiens OX=9606 GN=PLK1 PE=1 SV=1	PLK1	0.636	0.00983387	Down	68.254	18.2	K06631	8	8	8	3	7	6	5	4	4	2	4	2	1.06385	1.46128	1.22	0.879088	0.891197	1.10231	0.780618	0.76352	0.838139
hsa04114 Oocyte meiosis	0.00103058	6.25	Q12834	Cell division cycle protein 20 homolog OS=Homo sapiens OX=9606 GN=CDC20 PE=1 SV=2	CDC20	0.428	0.000862535	Down	54.722	11.4	K03363	4	4	4	4	4	4	2	3	4	3	2	2	1.44538	1.55813	1.72781	0.782438	0.76511	0.694273	0.614149	0.787197	0.625516
hsa04115 p53 signaling pathway	0.0647931	4.77	O14757	Serine/threonine-protein kinase Chk1 OS=Homo sapiens OX=9606 GN=CHEK1 PE=1 SV=2	CHEK1	0.567	0.000388115	Down	54.433	11.3	K02216	4	4	4	4	4	4	4	4	4	4	2	2	1.25859	1.29856	1.24595	1.01282	0.912562	1.11596	0.706024	0.662469	0.787071
hsa04115 p53 signaling pathway	0.0647931	4.77	P31350	Ribonucleoside-diphosphate reductase subunit M2 OS=Homo sapiens OX=9606 GN=RRM2 PE=1 SV=1	RRM2	0.528	1.3336e-06	Down	44.877	52.4	K10808	16	14	16	16	16	16	15	15	16	15	16	14	1.36368	1.40252	1.37503	0.908651	0.870594	0.894686	0.712635	0.732689	0.739515
hsa04120 Ubiquitin mediated proteolysis	0.084248	2.88	O00762	Ubiquitin-conjugating enzyme E2 C OS=Homo sapiens OX=9606 GN=UBE2C PE=1 SV=1	UBE2C	0.619	0.0308965	Down	19.652	41.3	K06688	6	6	6	6	5	4	4	5	5	5	5	5	1.41991	1.36068	0.973398	0.794753	0.897055	1.2295	0.669778	0.766637	0.888286
hsa04120 Ubiquitin mediated proteolysis	0.084248	2.88	Q12834	Cell division cycle protein 20 homolog OS=Homo sapiens OX=9606 GN=CDC20 PE=1 SV=2	CDC20	0.428	0.000862535	Down	54.722	11.4	K03363	4	4	4	4	4	4	2	3	4	3	2	2	1.44538	1.55813	1.72781	0.782438	0.76511	0.694273	0.614149	0.787197	0.625516
hsa04120 Ubiquitin mediated proteolysis	0.084248	2.88	Q16763	Ubiquitin-conjugating enzyme E2 S OS=Homo sapiens OX=9606 GN=UBE2S PE=1 SV=2	UBE2S	0.648	6.67973e-06	Down	23.845	36.9	K10583	5	5	5	5	5	5	5	5	5	5	5	5	1.18944	1.22007	1.19803	0.979672	1.04768	1.02622	0.798244	0.771498	0.769142
hsa04218 Cellular senescence	0.227421	2.22	O14757	Serine/threonine-protein kinase Chk1 OS=Homo sapiens OX=9606 GN=CHEK1 PE=1 SV=2	CHEK1	0.567	0.000388115	Down	54.433	11.3	K02216	4	4	4	4	4	4	4	4	4	4	2	2	1.25859	1.29856	1.24595	1.01282	0.912562	1.11596	0.706024	0.662469	0.787071
hsa04218 Cellular senescence	0.227421	2.22	P36873	Serine/threonine-protein phosphatase PP1-gamma catalytic subunit OS=Homo sapiens OX=9606 GN=PPP1CC PE=1 SV=1	PPP1CC	0.48	0.0092471	Down	36.983	47.7	K06269	16	2	2	2	2	2	2	2	2	2	2	2	1.52618	0.949716	1.35069	1.46534	1.26623	0.604121	0.604658	0.558833	0.674234
hsa04611 Platelet activation	0.11475	3.42	P07948	Tyrosine-protein kinase Lyn OS=Homo sapiens OX=9606 GN=LYN PE=1 SV=3	LYN	0.615	0.013084	Down	58.573	14.5	K05854	6	5	5	4	4	4	2	3	4	3	5	4	1.24516	1.44613	1.15799	0.878288	0.822682	1.08301	0.677446	0.935788	0.753511
hsa04611 Platelet activation	0.11475	3.42	P36873	Serine/threonine-protein phosphatase PP1-gamma catalytic subunit OS=Homo sapiens OX=9606 GN=PPP1CC PE=1 SV=1	PPP1CC	0.48	0.0092471	Down	36.983	47.7	K06269	16	2	2	2	2	2	2	2	2	2	2	2	1.52618	0.949716	1.35069	1.46534	1.26623	0.604121	0.604658	0.558833	0.674234
hsa04910 Insulin signaling pathway	0.232153	2.19	P36873	Serine/threonine-protein phosphatase PP1-gamma catalytic subunit OS=Homo sapiens OX=9606 GN=PPP1CC PE=1 SV=1	PPP1CC	0.48	0.0092471	Down	36.983	47.7	K06269	16	2	2	2	2	2	2	2	2	2	2	2	1.52618	0.949716	1.35069	1.46534	1.26623	0.604121	0.604658	0.558833	0.674234
hsa04910 Insulin signaling pathway	0.232153	2.19	P36956	Sterol regulatory element-binding protein 1 OS=Homo sapiens OX=9606 GN=SREBF1 PE=1 SV=2	SREBF1	0.649	0.0307342	Down	121.67	6.5	K07197	5	5	5	1	4	4	2	1	4	1	2	3		1.33721	1.28436	0.907052		0.769622		0.914894	0.786863
hsa04914 Progesterone-mediated oocyte maturation	0.0245484	4.72	O14965	Aurora kinase A OS=Homo sapiens OX=9606 GN=AURKA PE=1 SV=2	AURKA	0.583	0.0414396	Down	45.809	14.6	K11481	5	4	4	4	4	3	3	1	2	2	3	3	1.48329	1.44646	1.1718	0.75239		0.755603	0.546565	0.900047	0.943849
hsa04914 Progesterone-mediated oocyte maturation	0.0245484	4.72	P53350	Serine/threonine-protein kinase PLK1 OS=Homo sapiens OX=9606 GN=PLK1 PE=1 SV=1	PLK1	0.636	0.00983387	Down	68.254	18.2	K06631	8	8	8	3	7	6	5	4	4	2	4	2	1.06385	1.46128	1.22	0.879088	0.891197	1.10231	0.780618	0.76352	0.838139
hsa04914 Progesterone-mediated oocyte maturation	0.0245484	4.72	Q14807	Kinesin-like protein KIF22 OS=Homo sapiens OX=9606 GN=KIF22 PE=1 SV=5	KIF22	0.59	0.000251828	Down	73.261	24.8	K10403	14	14	14	11	9	12	8	6	8	6	9	5	1.27902	1.29545	1.33375	0.962047	0.949649	0.873996	0.73239	0.740578	0.833125
hsa04931 Insulin resistance	0.123136	3.28	P36873	Serine/threonine-protein phosphatase PP1-gamma catalytic subunit OS=Homo sapiens OX=9606 GN=PPP1CC PE=1 SV=1	PPP1CC	0.48	0.0092471	Down	36.983	47.7	K06269	16	2	2	2	2	2	2	2	2	2	2	2	1.52618	0.949716	1.35069	1.46534	1.26623	0.604121	0.604658	0.558833	0.674234
hsa04931 Insulin resistance	0.123136	3.28	P36956	Sterol regulatory element-binding protein 1 OS=Homo sapiens OX=9606 GN=SREBF1 PE=1 SV=2	SREBF1	0.649	0.0307342	Down	121.67	6.5	K07197	5	5	5	1	4	4	2	1	4	1	2	3		1.33721	1.28436	0.907052		0.769622		0.914894	0.786863
hsa05034 Alcoholism	0.13167	3.15	O15379	Histone deacetylase 3 OS=Homo sapiens OX=9606 GN=HDAC3 PE=1 SV=2	HDAC3	0.623	0.0041401	Down	48.847	16.4	K11404	5	4	4	2	2	2	3	3	4	3	3	3	1.23236	1.10223	1.31465	0.930657	1.21339	0.93361	0.847986	0.686634	0.738468
hsa05034 Alcoholism	0.13167	3.15	P36873	Serine/threonine-protein phosphatase PP1-gamma catalytic subunit OS=Homo sapiens OX=9606 GN=PPP1CC PE=1 SV=1	PPP1CC	0.48	0.0092471	Down	36.983	47.7	K06269	16	2	2	2	2	2	2	2	2	2	2	2	1.52618	0.949716	1.35069	1.46534	1.26623	0.604121	0.604658	0.558833	0.674234
hsa05166 Human T-cell leukemia virus 1 infection	0.355464	1.61	O14757	Serine/threonine-protein kinase Chk1 OS=Homo sapiens OX=9606 GN=CHEK1 PE=1 SV=2	CHEK1	0.567	0.000388115	Down	54.433	11.3	K02216	4	4	4	4	4	4	4	4	4	4	2	2	1.25859	1.29856	1.24595	1.01282	0.912562	1.11596	0.706024	0.662469	0.787071
hsa05166 Human T-cell leukemia virus 1 infection	0.355464	1.61	Q12834	Cell division cycle protein 20 homolog OS=Homo sapiens OX=9606 GN=CDC20 PE=1 SV=2	CDC20	0.428	0.000862535	Down	54.722	11.4	K03363	4	4	4	4	4	4	2	3	4	3	2	2	1.44538	1.55813	1.72781	0.782438	0.76511	0.694273	0.614149	0.787197	0.625516
hsa05171 Coronavirus disease - COVID-19	0.180857	2.04	O15393	Transmembrane protease serine 2 OS=Homo sapiens OX=9606 GN=TMPRSS2 PE=1 SV=3	TMPRSS2	0.571	5.28106e-06	Down	53.859	19.7	K09633	7	7	7	6	7	6	7	6	6	6	6	6	1.32519	1.34388	1.36349	0.830259	0.89266	0.94275	0.747521	0.787689	0.766559
hsa05171 Coronavirus disease - COVID-19	0.180857	2.04	P62841	40S ribosomal protein S15 OS=Homo sapiens OX=9606 GN=RPS15 PE=1 SV=2	RPS15	0.654	0.000221163	Down	17.04	41.4	K02958	7	7	7	7	7	7	5	6	5	7	6	6	1.20718	1.1674	1.13303	1.2047	1.21154	0.782933	0.788035	0.722246	0.782933
hsa05171 Coronavirus disease - COVID-19	0.180857	2.04	Q71UM5	40S ribosomal protein S27-like OS=Homo sapiens OX=9606 GN=RPS27L PE=1 SV=3	RPS27L	0.527	0.0134403	Down	9.4771	39.3	K02978	4	2	2	2	2	2	2	2	1	2	2	1	1.08585	1.17815	1.16339	1.15759	1.21168		0.69773	0.505597
hsa05202 Transcriptional misregulation in cancer	0.110617	3.5	O15393	Transmembrane protease serine 2 OS=Homo sapiens OX=9606 GN=TMPRSS2 PE=1 SV=3	TMPRSS2	0.571	5.28106e-06	Down	53.859	19.7	K09633	7	7	7	6	7	6	7	6	6	6	6	6	1.32519	1.34388	1.36349	0.830259	0.89266	0.94275	0.747521	0.787689	0.766559
hsa05202 Transcriptional misregulation in cancer	0.110617	3.5	Q03111	Protein ENL OS=Homo sapiens OX=9606 GN=MLLT1 PE=1 SV=2	MLLT1	0.619	0.0448508	Down	62.055	12.7	K15187	6	6	6	3	3	4	2	2	3	5	3	4	1.2512	0.921837	1.49509	1.17664	1.21123	0.67198	0.643757	0.815354	0.812905
hsa05203 Viral carcinogenesis	0.0435197	2.97	O14757	Serine/threonine-protein kinase Chk1 OS=Homo sapiens OX=9606 GN=CHEK1 PE=1 SV=2	CHEK1	0.567	0.000388115	Down	54.433	11.3	K02216	4	4	4	4	4	4	4	4	4	4	2	2	1.25859	1.29856	1.24595	1.01282	0.912562	1.11596	0.706024	0.662469	0.787071
hsa05203 Viral carcinogenesis	0.0435197	2.97	O15379	Histone deacetylase 3 OS=Homo sapiens OX=9606 GN=HDAC3 PE=1 SV=2	HDAC3	0.623	0.0041401	Down	48.847	16.4	K11404	5	4	4	2	2	2	3	3	4	3	3	3	1.23236	1.10223	1.31465	0.930657	1.21339	0.93361	0.847986	0.686634	0.738468
hsa05203 Viral carcinogenesis	0.0435197	2.97	P07948	Tyrosine-protein kinase Lyn OS=Homo sapiens OX=9606 GN=LYN PE=1 SV=3	LYN	0.615	0.013084	Down	58.573	14.5	K05854	6	5	5	4	4	4	2	3	4	3	5	4	1.24516	1.44613	1.15799	0.878288	0.822682	1.08301	0.677446	0.935788	0.753511
hsa05203 Viral carcinogenesis	0.0435197	2.97	Q12834	Cell division cycle protein 20 homolog OS=Homo sapiens OX=9606 GN=CDC20 PE=1 SV=2	CDC20	0.428	0.000862535	Down	54.722	11.4	K03363	4	4	4	4	4	4	2	3	4	3	2	2	1.44538	1.55813	1.72781	0.782438	0.76511	0.694273	0.614149	0.787197	0.625516
hsa05215 Prostate cancer	0.0196827	5.13	O15393	Transmembrane protease serine 2 OS=Homo sapiens OX=9606 GN=TMPRSS2 PE=1 SV=3	TMPRSS2	0.571	5.28106e-06	Down	53.859	19.7	K09633	7	7	7	6	7	6	7	6	6	6	6	6	1.32519	1.34388	1.36349	0.830259	0.89266	0.94275	0.747521	0.787689	0.766559
hsa05215 Prostate cancer	0.0196827	5.13	P07288	Prostate-specific antigen OS=Homo sapiens OX=9606 GN=KLK3 PE=1 SV=2	KLK3	0.435	9.15589e-06	Down	28.741	58.2	K01351	8	8	8	8	7	8	7	7	7	6	5	6	1.50031	1.4379	1.54386	0.8581	0.879157	0.831074	0.677109	0.637946	0.634547
hsa05215 Prostate cancer	0.0196827	5.13	P10275	Androgen receptor OS=Homo sapiens OX=9606 GN=AR PE=1 SV=3	AR	0.368	2.06721e-06	Down	99.187	20.7	K08557	13	13	13	11	10	11	5	3	6	7	8	8	1.83927	1.92893	1.95195	0.386869	0.391948	0.396525	0.679154	0.712578	0.712768

## Sheet: all
KEGG pathway	Mapping	Background	All Mapping	All Background	Fold Enrichment	Fisher's exact test p value	-log10(p value)	Related proteins
hsa04114 Oocyte meiosis	5	63	49	2913	4.72	0.00369352	2.43	O14965 P10275 P36873 P53350 Q12834
hsa00220 Arginine biosynthesis	2	12	49	2913	9.91	0.0164319	1.78	P15104 P78540
hsa00983 Drug metabolism - other enzymes	3	33	49	2913	5.4	0.0171279	1.77	P18440 P31350 Q9HA47
hsa01040 Biosynthesis of unsaturated fatty acids	2	18	49	2913	6.61	0.0357301	1.45	O60427 O95864
hsa05215 Prostate cancer	3	46	49	2913	3.88	0.0409435	1.39	O15393 P07288 P10275
hsa00561 Glycerolipid metabolism	2	21	49	2913	5.66	0.0475048	1.32	Q86XP1 Q9NUQ2

## Sheet: all Pathway2Protein
KEGG pathway	Fisher's exact test p value	Fold Enrichment	Protein accession	Protein description	Gene name	LN3/LN1 Ratio	LN3/LN1 P value	Regulated Type	MW [kDa]	Coverage [%]	KEGG KO No.	Peptides	Unique peptides	Razor + unique peptides	Razor + unique peptides LN1_1	Razor + unique peptides LN1_2	Razor + unique peptides LN1_3	Razor + unique peptides LN2_1	Razor + unique peptides LN2_2	Razor + unique peptides LN2_3	Razor + unique peptides LN3_1	Razor + unique peptides LN3_2	Razor + unique peptides LN3_3	LN1_1	LN1_2	LN1_3	LN2_1	LN2_2	LN2_3	LN3_1	LN3_2	LN3_3
hsa00220 Arginine biosynthesis	0.0164319	9.91	P15104	Glutamine synthetase OS=Homo sapiens OX=9606 GN=GLUL PE=1 SV=4	GLUL	0.629	3.0137e-05	Down	42.064	22	K01915	7	7	7	7	6	7	6	4	5	7	6	6	1.20345	1.25186	1.21144	0.963457	0.992711	1.07046	0.742917	0.772479	0.791215
hsa00220 Arginine biosynthesis	0.0164319	9.91	P78540	Arginase-2, mitochondrial OS=Homo sapiens OX=9606 GN=ARG2 PE=1 SV=1	ARG2	1.602	0.00269918	Up	38.577	35.9	K01476	8	8	8	4	4	6	6	6	7	5	5	6	0.758868	0.752837	0.617633	1.10687	1.19983	1.15301	1.17912	1.1476	1.08424
hsa00240 Pyrimidine metabolism	0.127385	3.21	P31350	Ribonucleoside-diphosphate reductase subunit M2 OS=Homo sapiens OX=9606 GN=RRM2 PE=1 SV=1	RRM2	0.528	1.3336e-06	Down	44.877	52.4	K10808	16	14	16	16	16	16	15	15	16	15	16	14	1.36368	1.40252	1.37503	0.908651	0.870594	0.894686	0.712635	0.732689	0.739515
hsa00240 Pyrimidine metabolism	0.127385	3.21	Q9HA47	Uridine-cytidine kinase 1 OS=Homo sapiens OX=9606 GN=UCK1 PE=1 SV=1	UCK1	0.599	0.0241048	Down	31.434	19.1	K00876	4	3	3	1	2	2	2	1	3	2	1	2		1.0906	1.2257	1.07902		1.21802	0.654335		0.732323
hsa00510 N-Glycan biosynthesis	0.0999404	3.72	Q9BVK2	Probable dolichyl pyrophosphate Glc1Man9GlcNAc2 alpha-1,3-glucosyltransferase OS=Homo sapiens OX=9606 GN=ALG8 PE=1 SV=2	ALG8	1.604	0.0188168	Up	60.087	10.8	K03849	4	4	4	4	4	4	4	4	4	4	3	4	1.02032	0.747321	0.717381	0.58857	0.953776	0.986009	1.30431	1.2042	1.47811
hsa00510 N-Glycan biosynthesis	0.0999404	3.72	Q9H3H5	UDP-N-acetylglucosamine--dolichyl-phosphate N-acetylglucosaminephosphotransferase OS=Homo sapiens OX=9606 GN=DPAGT1 PE=1 SV=2	DPAGT1	2.049	0.0136168	Up	46.089	4.7	K01001	2	2	2	2	2	2	1	2	1	1	2	2	0.646186	0.861569	0.652172		0.889429			1.3464	1.60425
hsa00561 Glycerolipid metabolism	0.0475048	5.66	Q86XP1	Diacylglycerol kinase eta OS=Homo sapiens OX=9606 GN=DGKH PE=1 SV=1	DGKH	1.895	0.0453272	Up	134.86	9.8	K00901	7	7	7	5	3	3	3	6	4	6	7	7	0.454048	1.01866	0.628692	1.03255	1.02817	0.856013	1.24453	1.26403	1.47331
hsa00561 Glycerolipid metabolism	0.0475048	5.66	Q9NUQ2	1-acyl-sn-glycerol-3-phosphate acyltransferase epsilon OS=Homo sapiens OX=9606 GN=AGPAT5 PE=1 SV=3	AGPAT5	0.547	0.00175989	Down	42.072	19.8	K19007	5	5	5	5	5	5	5	4	4	4	2	3	1.45504	1.24709	1.25188	1.13694	0.949947	0.795648	0.641218	0.799253	0.722989
hsa00564 Glycerophospholipid metabolism	0.121758	3.3	Q86XP1	Diacylglycerol kinase eta OS=Homo sapiens OX=9606 GN=DGKH PE=1 SV=1	DGKH	1.895	0.0453272	Up	134.86	9.8	K00901	7	7	7	5	3	3	3	6	4	6	7	7	0.454048	1.01866	0.628692	1.03255	1.02817	0.856013	1.24453	1.26403	1.47331
hsa00564 Glycerophospholipid metabolism	0.121758	3.3	Q9NUQ2	1-acyl-sn-glycerol-3-phosphate acyltransferase epsilon OS=Homo sapiens OX=9606 GN=AGPAT5 PE=1 SV=3	AGPAT5	0.547	0.00175989	Down	42.072	19.8	K19007	5	5	5	5	5	5	5	4	4	4	2	3	1.45504	1.24709	1.25188	1.13694	0.949947	0.795648	0.641218	0.799253	0.722989
hsa00600 Sphingolipid metabolism	0.051705	5.4	O15270	Serine palmitoyltransferase 2 OS=Homo sapiens OX=9606 GN=SPTLC2 PE=1 SV=1	SPTLC2	0.557	0.00198374	Down	62.924	14.4	K00654	5	5	5	3	4	3	2	3	3	4	3	3	1.29176	1.52955	1.2558	0.991216	0.677248	0.981551	0.822898	0.685961	0.76402
hsa00600 Sphingolipid metabolism	0.051705	5.4	P07602	Prosaposin OS=Homo sapiens OX=9606 GN=PSAP PE=1 SV=2	PSAP	1.769	0.00333148	Up	58.112	31.1	K12382	14	14	14	6	8	9	9	7	12	12	13	12	0.722257	0.622393	0.840001	0.889937	0.998405	1.06327	1.30255	1.21159	1.3496
hsa00983 Drug metabolism - other enzymes	0.0171279	5.4	P18440	Arylamine N-acetyltransferase 1 OS=Homo sapiens OX=9606 GN=NAT1 PE=1 SV=2	NAT1	0.548	0.00839538	Down	33.898	23.4	K00622	6	6	6	4	4	6	5	5	4	5	4	3	1.37553	1.25997	1.58708	0.789784	0.83534	0.83997	0.835569	0.859804	0.616955
hsa00983 Drug metabolism - other enzymes	0.0171279	5.4	P31350	Ribonucleoside-diphosphate reductase subunit M2 OS=Homo sapiens OX=9606 GN=RRM2 PE=1 SV=1	RRM2	0.528	1.3336e-06	Down	44.877	52.4	K10808	16	14	16	16	16	16	15	15	16	15	16	14	1.36368	1.40252	1.37503	0.908651	0.870594	0.894686	0.712635	0.732689	0.739515
hsa00983 Drug metabolism - other enzymes	0.0171279	5.4	Q9HA47	Uridine-cytidine kinase 1 OS=Homo sapiens OX=9606 GN=UCK1 PE=1 SV=1	UCK1	0.599	0.0241048	Down	31.434	19.1	K00876	4	3	3	1	2	2	2	1	3	2	1	2		1.0906	1.2257	1.07902		1.21802	0.654335		0.732323
hsa01040 Biosynthesis of unsaturated fatty acids	0.0357301	6.61	O60427	Acyl-CoA (8-3)-desaturase OS=Homo sapiens OX=9606 GN=FADS1 PE=1 SV=3	FADS1	0.635	0.0295117	Down	51.964	23.6	K10224	7	7	7	6	7	4	6	5	4	4	4	3	1.03047	1.57671	1.18792	1.13155	0.806418	0.856478	0.754599	0.874679	0.781179
hsa01040 Biosynthesis of unsaturated fatty acids	0.0357301	6.61	O95864	Acyl-CoA 6-desaturase OS=Homo sapiens OX=9606 GN=FADS2 PE=1 SV=1	FADS2	0.479	5.1824e-06	Down	52.259	27.3	K10226	12	12	12	11	10	10	10	11	11	10	10	9	1.3639	1.35145	1.28336	1.00888	1.04881	1.02929	0.643889	0.622885	0.647541
hsa03320 PPAR signaling pathway	0.0650554	4.76	O95864	Acyl-CoA 6-desaturase OS=Homo sapiens OX=9606 GN=FADS2 PE=1 SV=1	FADS2	0.479	5.1824e-06	Down	52.259	27.3	K10226	12	12	12	11	10	10	10	11	11	10	10	9	1.3639	1.35145	1.28336	1.00888	1.04881	1.02929	0.643889	0.622885	0.647541
hsa03320 PPAR signaling pathway	0.0650554	4.76	Q01581	Hydroxymethylglutaryl-CoA synthase, cytoplasmic OS=Homo sapiens OX=9606 GN=HMGCS1 PE=1 SV=2	HMGCS1	0.575	0.000427103	Down	57.293	50.6	K01641	19	18	19	13	14	13	16	16	16	12	12	12	0.991568	0.952667	1.08165	1.40978	1.38455	1.44096	0.593124	0.539823	0.605868
hsa04068 FoxO signaling pathway	0.242438	2.12	P53350	Serine/threonine-protein kinase PLK1 OS=Homo sapiens OX=9606 GN=PLK1 PE=1 SV=1	PLK1	0.636	0.00983387	Down	68.254	18.2	K06631	8	8	8	3	7	6	5	4	4	2	4	2	1.06385	1.46128	1.22	0.879088	0.891197	1.10231	0.780618	0.76352	0.838139
hsa04068 FoxO signaling pathway	0.242438	2.12	Q12983	BCL2/adenovirus E1B 19 kDa protein-interacting protein 3 OS=Homo sapiens OX=9606 GN=BNIP3 PE=1 SV=3	BNIP3	0.631	0.00166764	Down	27.832	13.5	K15464	3	3	3	3	3	3	3	2	3	3	3	3	1.20494	1.30607	1.23513	0.957442	0.955521	0.977368	0.801476	0.856295	0.705771
hsa04072 Phospholipase D signaling pathway	0.138822	3.05	Q86XP1	Diacylglycerol kinase eta OS=Homo sapiens OX=9606 GN=DGKH PE=1 SV=1	DGKH	1.895	0.0453272	Up	134.86	9.8	K00901	7	7	7	5	3	3	3	6	4	6	7	7	0.454048	1.01866	0.628692	1.03255	1.02817	0.856013	1.24453	1.26403	1.47331
hsa04072 Phospholipase D signaling pathway	0.138822	3.05	Q9NUQ2	1-acyl-sn-glycerol-3-phosphate acyltransferase epsilon OS=Homo sapiens OX=9606 GN=AGPAT5 PE=1 SV=3	AGPAT5	0.547	0.00175989	Down	42.072	19.8	K19007	5	5	5	5	5	5	5	4	4	4	2	3	1.45504	1.24709	1.25188	1.13694	0.949947	0.795648	0.641218	0.799253	0.722989
hsa04110 Cell cycle	0.126676	2.41	O14757	Serine/threonine-protein kinase Chk1 OS=Homo sapiens OX=9606 GN=CHEK1 PE=1 SV=2	CHEK1	0.567	0.000388115	Down	54.433	11.3	K02216	4	4	4	4	4	4	4	4	4	4	2	2	1.25859	1.29856	1.24595	1.01282	0.912562	1.11596	0.706024	0.662469	0.787071
hsa04110 Cell cycle	0.126676	2.41	P53350	Serine/threonine-protein kinase PLK1 OS=Homo sapiens OX=9606 GN=PLK1 PE=1 SV=1	PLK1	0.636	0.00983387	Down	68.254	18.2	K06631	8	8	8	3	7	6	5	4	4	2	4	2	1.06385	1.46128	1.22	0.879088	0.891197	1.10231	0.780618	0.76352	0.838139
hsa04110 Cell cycle	0.126676	2.41	Q12834	Cell division cycle protein 20 homolog OS=Homo sapiens OX=9606 GN=CDC20 PE=1 SV=2	CDC20	0.428	0.000862535	Down	54.722	11.4	K03363	4	4	4	4	4	4	2	3	4	3	2	2	1.44538	1.55813	1.72781	0.782438	0.76511	0.694273	0.614149	0.787197	0.625516
hsa04114 Oocyte meiosis	0.00369352	4.72	O14965	Aurora kinase A OS=Homo sapiens OX=9606 GN=AURKA PE=1 SV=2	AURKA	0.583	0.0414396	Down	45.809	14.6	K11481	5	4	4	4	4	3	3	1	2	2	3	3	1.48329	1.44646	1.1718	0.75239		0.755603	0.546565	0.900047	0.943849
hsa04114 Oocyte meiosis	0.00369352	4.72	P10275	Androgen receptor OS=Homo sapiens OX=9606 GN=AR PE=1 SV=3	AR	0.368	2.06721e-06	Down	99.187	20.7	K08557	13	13	13	11	10	11	5	3	6	7	8	8	1.83927	1.92893	1.95195	0.386869	0.391948	0.396525	0.679154	0.712578	0.712768
hsa04114 Oocyte meiosis	0.00369352	4.72	P36873	Serine/threonine-protein phosphatase PP1-gamma catalytic subunit OS=Homo sapiens OX=9606 GN=PPP1CC PE=1 SV=1	PPP1CC	0.48	0.0092471	Down	36.983	47.7	K06269	16	2	2	2	2	2	2	2	2	2	2	2	1.52618	0.949716	1.35069	1.46534	1.26623	0.604121	0.604658	0.558833	0.674234
hsa04114 Oocyte meiosis	0.00369352	4.72	P53350	Serine/threonine-protein kinase PLK1 OS=Homo sapiens OX=9606 GN=PLK1 PE=1 SV=1	PLK1	0.636	0.00983387	Down	68.254	18.2	K06631	8	8	8	3	7	6	5	4	4	2	4	2	1.06385	1.46128	1.22	0.879088	0.891197	1.10231	0.780618	0.76352	0.838139
hsa04114 Oocyte meiosis	0.00369352	4.72	Q12834	Cell division cycle protein 20 homolog OS=Homo sapiens OX=9606 GN=CDC20 PE=1 SV=2	CDC20	0.428	0.000862535	Down	54.722	11.4	K03363	4	4	4	4	4	4	2	3	4	3	2	2	1.44538	1.55813	1.72781	0.782438	0.76511	0.694273	0.614149	0.787197	0.625516
hsa04115 p53 signaling pathway	0.105283	3.6	O14757	Serine/threonine-protein kinase Chk1 OS=Homo sapiens OX=9606 GN=CHEK1 PE=1 SV=2	CHEK1	0.567	0.000388115	Down	54.433	11.3	K02216	4	4	4	4	4	4	4	4	4	4	2	2	1.25859	1.29856	1.24595	1.01282	0.912562	1.11596	0.706024	0.662469	0.787071
hsa04115 p53 signaling pathway	0.105283	3.6	P31350	Ribonucleoside-diphosphate reductase subunit M2 OS=Homo sapiens OX=9606 GN=RRM2 PE=1 SV=1	RRM2	0.528	1.3336e-06	Down	44.877	52.4	K10808	16	14	16	16	16	16	15	15	16	15	16	14	1.36368	1.40252	1.37503	0.908651	0.870594	0.894686	0.712635	0.732689	0.739515
hsa04120 Ubiquitin mediated proteolysis	0.158036	2.17	O00762	Ubiquitin-conjugating enzyme E2 C OS=Homo sapiens OX=9606 GN=UBE2C PE=1 SV=1	UBE2C	0.619	0.0308965	Down	19.652	41.3	K06688	6	6	6	6	5	4	4	5	5	5	5	5	1.41991	1.36068	0.973398	0.794753	0.897055	1.2295	0.669778	0.766637	0.888286
hsa04120 Ubiquitin mediated proteolysis	0.158036	2.17	Q12834	Cell division cycle protein 20 homolog OS=Homo sapiens OX=9606 GN=CDC20 PE=1 SV=2	CDC20	0.428	0.000862535	Down	54.722	11.4	K03363	4	4	4	4	4	4	2	3	4	3	2	2	1.44538	1.55813	1.72781	0.782438	0.76511	0.694273	0.614149	0.787197	0.625516
hsa04120 Ubiquitin mediated proteolysis	0.158036	2.17	Q16763	Ubiquitin-conjugating enzyme E2 S OS=Homo sapiens OX=9606 GN=UBE2S PE=1 SV=2	UBE2S	0.648	6.67973e-06	Down	23.845	36.9	K10583	5	5	5	5	5	5	5	5	5	5	5	5	1.18944	1.22007	1.19803	0.979672	1.04768	1.02622	0.798244	0.771498	0.769142
hsa04142 Lysosome	0.391915	1.49	P07602	Prosaposin OS=Homo sapiens OX=9606 GN=PSAP PE=1 SV=2	PSAP	1.769	0.00333148	Up	58.112	31.1	K12382	14	14	14	6	8	9	9	7	12	12	13	12	0.722257	0.622393	0.840001	0.889937	0.998405	1.06327	1.30255	1.21159	1.3496
hsa04142 Lysosome	0.391915	1.49	Q8NI08	Nuclear receptor coactivator 7 OS=Homo sapiens OX=9606 GN=NCOA7 PE=1 SV=2	NCOA7	1.901	0.00434082	Up	106.16	8.2	K25442	5	5	5	2	2	2	4	1	4	3	3	5		0.690367	0.723729	0.7289		0.825185	1.46992	1.37039	1.19151
hsa04218 Cellular senescence	0.336693	1.67	O14757	Serine/threonine-protein kinase Chk1 OS=Homo sapiens OX=9606 GN=CHEK1 PE=1 SV=2	CHEK1	0.567	0.000388115	Down	54.433	11.3	K02216	4	4	4	4	4	4	4	4	4	4	2	2	1.25859	1.29856	1.24595	1.01282	0.912562	1.11596	0.706024	0.662469	0.787071
hsa04218 Cellular senescence	0.336693	1.67	P36873	Serine/threonine-protein phosphatase PP1-gamma catalytic subunit OS=Homo sapiens OX=9606 GN=PPP1CC PE=1 SV=1	PPP1CC	0.48	0.0092471	Down	36.983	47.7	K06269	16	2	2	2	2	2	2	2	2	2	2	2	1.52618	0.949716	1.35069	1.46534	1.26623	0.604121	0.604658	0.558833	0.674234
hsa04514 Cell adhesion molecules	0.051705	5.4	O95297	Myelin protein zero-like protein 1 OS=Homo sapiens OX=9606 GN=MPZL1 PE=1 SV=1	MPZL1	0.661	0.00102064	Down	29.082	27.1	K06770	5	5	5	4	5	5	4	4	4	5	3	5	1.2433	1.20051	1.22179	0.903667	0.980658	1.02665	0.780055	0.758323	0.88505
hsa04514 Cell adhesion molecules	0.051705	5.4	P14209	CD99 antigen OS=Homo sapiens OX=9606 GN=CD99 PE=1 SV=1	CD99	2.177	0.000146425	Up	18.848	29.7	K06520	3	3	3	3	3	3	3	3	3	3	3	3	0.628807	0.63612	0.60012	0.835456	0.92289	1.31696	1.36692	1.46637	1.22636
hsa04611 Platelet activation	0.180407	2.58	P07948	Tyrosine-protein kinase Lyn OS=Homo sapiens OX=9606 GN=LYN PE=1 SV=3	LYN	0.615	0.013084	Down	58.573	14.5	K05854	6	5	5	4	4	4	2	3	4	3	5	4	1.24516	1.44613	1.15799	0.878288	0.822682	1.08301	0.677446	0.935788	0.753511
hsa04611 Platelet activation	0.180407	2.58	P36873	Serine/threonine-protein phosphatase PP1-gamma catalytic subunit OS=Homo sapiens OX=9606 GN=PPP1CC PE=1 SV=1	PPP1CC	0.48	0.0092471	Down	36.983	47.7	K06269	16	2	2	2	2	2	2	2	2	2	2	2	1.52618	0.949716	1.35069	1.46534	1.26623	0.604121	0.604658	0.558833	0.674234
hsa04910 Insulin signaling pathway	0.342906	1.65	P36873	Serine/threonine-protein phosphatase PP1-gamma catalytic subunit OS=Homo sapiens OX=9606 GN=PPP1CC PE=1 SV=1	PPP1CC	0.48	0.0092471	Down	36.983	47.7	K06269	16	2	2	2	2	2	2	2	2	2	2	2	1.52618	0.949716	1.35069	1.46534	1.26623	0.604121	0.604658	0.558833	0.674234
hsa04910 Insulin signaling pathway	0.342906	1.65	P36956	Sterol regulatory element-binding protein 1 OS=Homo sapiens OX=9606 GN=SREBF1 PE=1 SV=2	SREBF1	0.649	0.0307342	Down	121.67	6.5	K07197	5	5	5	1	4	4	2	1	4	1	2	3		1.33721	1.28436	0.907052		0.769622		0.914894	0.786863
hsa04914 Progesterone-mediated oocyte maturation	0.0504664	3.57	O14965	Aurora kinase A OS=Homo sapiens OX=9606 GN=AURKA PE=1 SV=2	AURKA	0.583	0.0414396	Down	45.809	14.6	K11481	5	4	4	4	4	3	3	1	2	2	3	3	1.48329	1.44646	1.1718	0.75239		0.755603	0.546565	0.900047	0.943849
hsa04914 Progesterone-mediated oocyte maturation	0.0504664	3.57	P53350	Serine/threonine-protein kinase PLK1 OS=Homo sapiens OX=9606 GN=PLK1 PE=1 SV=1	PLK1	0.636	0.00983387	Down	68.254	18.2	K06631	8	8	8	3	7	6	5	4	4	2	4	2	1.06385	1.46128	1.22	0.879088	0.891197	1.10231	0.780618	0.76352	0.838139
hsa04914 Progesterone-mediated oocyte maturation	0.0504664	3.57	Q14807	Kinesin-like protein KIF22 OS=Homo sapiens OX=9606 GN=KIF22 PE=1 SV=5	KIF22	0.59	0.000251828	Down	73.261	24.8	K10403	14	14	14	11	9	12	8	6	8	6	9	5	1.27902	1.29545	1.33375	0.962047	0.949649	0.873996	0.73239	0.740578	0.833125
hsa04931 Insulin resistance	0.192631	2.48	P36873	Serine/threonine-protein phosphatase PP1-gamma catalytic subunit OS=Homo sapiens OX=9606 GN=PPP1CC PE=1 SV=1	PPP1CC	0.48	0.0092471	Down	36.983	47.7	K06269	16	2	2	2	2	2	2	2	2	2	2	2	1.52618	0.949716	1.35069	1.46534	1.26623	0.604121	0.604658	0.558833	0.674234
hsa04931 Insulin resistance	0.192631	2.48	P36956	Sterol regulatory element-binding protein 1 OS=Homo sapiens OX=9606 GN=SREBF1 PE=1 SV=2	SREBF1	0.649	0.0307342	Down	121.67	6.5	K07197	5	5	5	1	4	4	2	1	4	1	2	3		1.33721	1.28436	0.907052		0.769622		0.914894	0.786863
hsa05034 Alcoholism	0.204966	2.38	O15379	Histone deacetylase 3 OS=Homo sapiens OX=9606 GN=HDAC3 PE=1 SV=2	HDAC3	0.623	0.0041401	Down	48.847	16.4	K11404	5	4	4	2	2	2	3	3	4	3	3	3	1.23236	1.10223	1.31465	0.930657	1.21339	0.93361	0.847986	0.686634	0.738468
hsa05034 Alcoholism	0.204966	2.38	P36873	Serine/threonine-protein phosphatase PP1-gamma catalytic subunit OS=Homo sapiens OX=9606 GN=PPP1CC PE=1 SV=1	PPP1CC	0.48	0.0092471	Down	36.983	47.7	K06269	16	2	2	2	2	2	2	2	2	2	2	2	1.52618	0.949716	1.35069	1.46534	1.26623	0.604121	0.604658	0.558833	0.674234
hsa05171 Coronavirus disease - COVID-19	0.443852	1.54	O15393	Transmembrane protease serine 2 OS=Homo sapiens OX=9606 GN=TMPRSS2 PE=1 SV=3	TMPRSS2	0.571	5.28106e-06	Down	53.859	19.7	K09633	7	7	7	6	7	6	7	6	6	6	6	6	1.32519	1.34388	1.36349	0.830259	0.89266	0.94275	0.747521	0.787689	0.766559
hsa05171 Coronavirus disease - COVID-19	0.443852	1.54	P62841	40S ribosomal protein S15 OS=Homo sapiens OX=9606 GN=RPS15 PE=1 SV=2	RPS15	0.654	0.000221163	Down	17.04	41.4	K02958	7	7	7	7	7	7	5	6	5	7	6	6	1.20718	1.1674	1.13303	1.2047	1.21154	0.782933	0.788035	0.722246	0.782933
hsa05171 Coronavirus disease - COVID-19	0.443852	1.54	Q71UM5	40S ribosomal protein S27-like OS=Homo sapiens OX=9606 GN=RPS27L PE=1 SV=3	RPS27L	0.527	0.0134403	Down	9.4771	39.3	K02978	4	2	2	2	2	2	2	2	1	2	2	1	1.08585	1.17815	1.16339	1.15759	1.21168		0.69773	0.505597
hsa05202 Transcriptional misregulation in cancer	0.174344	2.64	O15393	Transmembrane protease serine 2 OS=Homo sapiens OX=9606 GN=TMPRSS2 PE=1 SV=3	TMPRSS2	0.571	5.28106e-06	Down	53.859	19.7	K09633	7	7	7	6	7	6	7	6	6	6	6	6	1.32519	1.34388	1.36349	0.830259	0.89266	0.94275	0.747521	0.787689	0.766559
hsa05202 Transcriptional misregulation in cancer	0.174344	2.64	Q03111	Protein ENL OS=Homo sapiens OX=9606 GN=MLLT1 PE=1 SV=2	MLLT1	0.619	0.0448508	Down	62.055	12.7	K15187	6	6	6	3	3	4	2	2	3	5	3	4	1.2512	0.921837	1.49509	1.17664	1.21123	0.67198	0.643757	0.815354	0.812905
hsa05203 Viral carcinogenesis	0.100694	2.24	O14757	Serine/threonine-protein kinase Chk1 OS=Homo sapiens OX=9606 GN=CHEK1 PE=1 SV=2	CHEK1	0.567	0.000388115	Down	54.433	11.3	K02216	4	4	4	4	4	4	4	4	4	4	2	2	1.25859	1.29856	1.24595	1.01282	0.912562	1.11596	0.706024	0.662469	0.787071
hsa05203 Viral carcinogenesis	0.100694	2.24	O15379	Histone deacetylase 3 OS=Homo sapiens OX=9606 GN=HDAC3 PE=1 SV=2	HDAC3	0.623	0.0041401	Down	48.847	16.4	K11404	5	4	4	2	2	2	3	3	4	3	3	3	1.23236	1.10223	1.31465	0.930657	1.21339	0.93361	0.847986	0.686634	0.738468
hsa05203 Viral carcinogenesis	0.100694	2.24	P07948	Tyrosine-protein kinase Lyn OS=Homo sapiens OX=9606 GN=LYN PE=1 SV=3	LYN	0.615	0.013084	Down	58.573	14.5	K05854	6	5	5	4	4	4	2	3	4	3	5	4	1.24516	1.44613	1.15799	0.878288	0.822682	1.08301	0.677446	0.935788	0.753511
hsa05203 Viral carcinogenesis	0.100694	2.24	Q12834	Cell division cycle protein 20 homolog OS=Homo sapiens OX=9606 GN=CDC20 PE=1 SV=2	CDC20	0.428	0.000862535	Down	54.722	11.4	K03363	4	4	4	4	4	4	2	3	4	3	2	2	1.44538	1.55813	1.72781	0.782438	0.76511	0.694273	0.614149	0.787197	0.625516
hsa05215 Prostate cancer	0.0409435	3.88	O15393	Transmembrane protease serine 2 OS=Homo sapiens OX=9606 GN=TMPRSS2 PE=1 SV=3	TMPRSS2	0.571	5.28106e-06	Down	53.859	19.7	K09633	7	7	7	6	7	6	7	6	6	6	6	6	1.32519	1.34388	1.36349	0.830259	0.89266	0.94275	0.747521	0.787689	0.766559
hsa05215 Prostate cancer	0.0409435	3.88	P07288	Prostate-specific antigen OS=Homo sapiens OX=9606 GN=KLK3 PE=1 SV=2	KLK3	0.435	9.15589e-06	Down	28.741	58.2	K01351	8	8	8	8	7	8	7	7	7	6	5	6	1.50031	1.4379	1.54386	0.8581	0.879157	0.831074	0.677109	0.637946	0.634547
hsa05215 Prostate cancer	0.0409435	3.88	P10275	Androgen receptor OS=Homo sapiens OX=9606 GN=AR PE=1 SV=3	AR	0.368	2.06721e-06	Down	99.187	20.7	K08557	13	13	13	11	10	11	5	3	6	7	8	8	1.83927	1.92893	1.95195	0.386869	0.391948	0.396525	0.679154	0.712578	0.712768
