# Supplementary material for: Selective androgen receptor degrader (SARD) to overcome antiandrogen resistance in castration-resistant prostate cancer
Source: eLife journal article supplement (doi:10.7554/elife.70700), 2023-01-19
Supplement: data2 [file Figure 4-figure supplement 1.xls]

## Sheet: Figure 4-figure supplement 1
Plate	Repeat	Well	Type	Time	S (RFU)	Time	P (RFU)	Time	FP-LYG (mP)
1	1	K01	M	1899-12-31 00:00:18	10374270	1899-12-31 00:00:18	4512566	1899-12-31 00:00:18	393.751
1	1	K02	M	1899-12-31 00:00:21	10428169	1899-12-31 00:00:21	4672851	1899-12-31 00:00:21	381.121
1	1	K03	M	1899-12-31 00:00:23	10022928	1899-12-31 00:00:23	4522138	1899-12-31 00:00:23	378.189
1	1	L01	M	1899-12-31 00:00:27	11141666	1899-12-31 00:00:27	4659407	1899-12-31 00:00:27	410.242
1	1	L02	M	1899-12-31 00:00:30	11099437	1899-12-31 00:00:30	4589387	1899-12-31 00:00:30	414.948
1	1	L03	M	1899-12-31 00:00:33	10612378	1899-12-31 00:00:33	4369983	1899-12-31 00:00:33	416.65
1	1	M01	M	1899-12-31 00:00:37	10187427	1899-12-31 00:00:37	3915792	1899-12-31 00:00:37	444.695
1	1	M02	M	1899-12-31 00:00:40	10151759	1899-12-31 00:00:40	4091873	1899-12-31 00:00:40	425.445
1	1	M03	M	1899-12-31 00:00:42	10117316	1899-12-31 00:00:42	3962082	1899-12-31 00:00:42	437.18
1	1	N01	M	1899-12-31 00:00:46	8847250	1899-12-31 00:00:46	4246938	1899-12-31 00:00:46	351.325
1	1	N02	M	1899-12-31 00:00:49	9926489	1899-12-31 00:00:49	4873804	1899-12-31 00:00:49	341.391
1	1	N03	M	1899-12-31 00:00:52	9083043	1899-12-31 00:00:52	4260342	1899-12-31 00:00:52	361.43
1	1	O01	M	1899-12-31 00:00:56	7357346	1899-12-31 00:00:56	2823880	1899-12-31 00:00:56	445.277
1	1	O02	M	1899-12-31 00:00:58	4567647	1899-12-31 00:00:58	1477733	1899-12-31 00:00:58	511.12
1	1	O03	M	1899-12-31 00:01:01	5924011	1899-12-31 00:01:01	2210534	1899-12-31 00:01:01	456.507
1	1	P01	M	1899-12-31 00:01:05	9171824	1899-12-31 00:01:05	4468585	1899-12-31 00:01:05	344.802
1	1	P02	M	1899-12-31 00:01:08	9496929	1899-12-31 00:01:08	4589946	1899-12-31 00:01:08	348.337
1	1	P03	M	1899-12-31 00:01:11	9563094	1899-12-31 00:01:11	4532493	1899-12-31 00:01:11	356.892
			Z15 10μM	Z15 2μM	Z15 0.4μM	R1881 10μM	Control	Tracer
			393.751	410.242	444.695	351.325	445.277	344.802
			381.121	414.948	425.445	341.391	511.12	348.337
			378.189	416.65	437.18	361.43	456.507	356.892

## Sheet: Plate_Page1
Plate	Repeat	End time	Start temp.	End temp.	BarCode
1	1	6:58:22 PM	17.2	17.2	N/A
S (RFU)
15696652
10374270	10428169	10022928
11141666	11099437	10612378
10187427	10151759	10117316
8847250	9926489	9083043
7357346	4567647	5924011
9171824	9496929	9563094
P (RFU)
2213935
4512566	4672851	4522138
4659407	4589387	4369983
3915792	4091873	3962082
4246938	4873804	4260342
2823880	1477733	2210534
4468585	4589946	4532493
FP-LYG (mP)
N/A
393.751	381.121	378.189
410.242	414.948	416.65
444.695	425.445	437.18
351.325	341.391	361.43
445.277	511.12	456.507
344.802	348.337	356.892

## Sheet: Protocol
Protocol description
Protocol name ..................... XYL665&620
Protocol number ................... N/A
Name of the plate type ............ NUNC 384
Number of wells in the plate ...... 16 X 24
Height of the plate ............... 14.4 mm
Offset of the wells ............... 9.000 mm, 12.000 mm
Distance between wells ............ 4.500 mm, 4.500 mm
Number of repeats ................. 1
Delay between repeats ............. 0 s
Measurement height ................ 8.00 mm
Protocol notes ....................
Name of the label ................. FP-LYG
Label technology .................. Fluorescence polarization
CW-lamp filter name ............... F485
CW-lamp filter slot ............... A5
Emission filter name .............. F535
Emission filter slot .............. A5
Measurement time .................. 1.0 s
Emission aperture ................. Normal
CW-lamp energy .................... 65535
Second measurement CW-lamp energy . 0
Emission side ..................... Above
CW-Lamp Control ................... Constant Voltage
Polarizer Aperture ................ Normal
G-factor .......................... 1.000
Plate map of plate 1
A | E E E E E E E E E E E E E E E E E E E E E E E E
B | E E E E E E E E E E E E E E E E E E E E E E E E
C | E E E E E E E E E E E E E E E E E E E E E E E E
D | E E E E E E E E E E E E E E E E E E E E E E E E
E | E E E E E E E E E E E E E E E E E E E E E E E E
F | E E E E E E E E E E E E E E E E E E E E E E E E
G | E E E E E E E E E E E E E E E E E E E E E E E E
H | E E E E E E E E E E E E E E E E E E E E E E E E
I | E E E E E E E E E E E E E E E E E E E E E E E E
J | E E E E E E E E E E E E E E E E E E E E E E E E
K | M M M E E E E E E E E E E E E E E E E E E E E E
L | M M M E E E E E E E E E E E E E E E E E E E E E
M | M M M E E E E E E E E E E E E E E E E E E E E E
N | M M M E E E E E E E E E E E E E E E E E E E E E
O | M M M E E E E E E E E E E E E E E E E E E E E E
P | M M M E E E E E E E E E E E E E E E E E E E E E
Protocol created by ............... Administrator
Protocol creation date ............ 9/20/2017
Protocol last edited by ........... Administrator
Protocol last edited .............. 11/25/2017
Instrument serial number: ......... 20300945
Assay ID: ........................ 1777
Measured on ....................... 11/25/2017 6:56:57 PM
