# Supplementary material for: Selective androgen receptor degrader (SARD) to overcome antiandrogen resistance in castration-resistant prostate cancer
Source: eLife journal article supplement (doi:10.7554/elife.70700), 2023-01-19
Supplement: data2 [file Figure 4-figure supplement 2B-C.xls]

## Sheet: Figure 4-figure supplement 2B-C
	Analysis of figure S7A
			Area	Mean	Min	Max	IntDen	RawIntDen			AR/actin	ARV7/actin
	ARV-110	1	792	82.057	2	199	64989	64989		1	0.544255	1.19805
		2	616	39.888	0	105	24571	24571		2	0.166094	1.13406
	AR	3	456	69.48	27	121	31683	31683		3	0.194908	0.968417
		4	360	59.247	32	96	21329	21329		4	0.152943	1.12788
		5	392	69.992	31	112	27437	27437		5	0.189097	1.09887
		6	480	81.94	17	149	19331	39331		6	0.141527	1.28134
		7	924	154.825	19	197	143058	143058			AR/actin	ARV7/actin
		8	960	174.756	58	193	167766	167766		1	0.999992	1
	ARV7	9	864	182.199	64	196	157420	157420		2	0.305175	0.946588
		10	864	182.05	63	203	157291	157291		3	0.358115	0.808327
		11	880	181.182	52	206	159440	159440		4	0.281011	0.941431
		12	1000	175.017	29	212	175017	175017		5	0.347438	0.917212
										6	0.260035	1.06952
		7	880	135.692	19	194	119409	119409
		8	1000	147.934	30	194	147934	147934
	actin	9	1080	150.513	42	197	162554	162554
		10	920	151.584	38	197	139457	139457
		11	1000	145.095	36	200	145095	145095
		12	1056	129.346	24	203	136589	136589
