# Supplementary material for: Selective androgen receptor degrader (SARD) to overcome antiandrogen resistance in castration-resistant prostate cancer
Source: eLife journal article supplement (doi:10.7554/elife.70700), 2023-01-19
Supplement: data2 [file Figure 4-figure supplement 2E-F.xls]

## Sheet: Figure 4-figure supplement 2E-F
Analysis of figure S7D										original ratio
			Area	Mean	Min	Max	IntDen	RawIntDen			AR/actin	ARV7/actin
	UT-34	1	864	98.443	4	201	65055	85055		1	0.625481	1.61586
		2	800	67.385	1	166	53908	53908		2	0.551122	1.57891
	AR	3	640	110.452	19	194	70689	70689		3	0.618516	1.48276
		4	828	79.508	1	198	65833	65833		4	0.533341	1.35112
		5	924	93.806	4	199	86677	86677		5	0.739041	1.42227
		6	756	84.345	4	206	63765	63765		6	0.526657	1.01807
										Relative ratio
		7	1040	171.213	32	204	168062	178062			AR/actin	ARV7/actin
		8	1056	146.251	40	196	154441	154441		1	1	0.999973
	ARV7	9	1104	153.498	39	196	169462	169462		2	0.881119	0.977108
		10	1144	145.782	32	196	166775	166775		3	0.988867	0.917608
		11	1056	157.962	41	199	166808	166808		4	0.852691	0.836138
		12	800	154.079	42	206	123263	123263		5	1.18156	0.880172
										6	0.842005	0.630034
		1	736	141.315	35	205	104008	104008
		2	756	129.385	29	200	97815	97815
		3	968	118.066	26	199	114288	114288
	actin	4	900	137.15	31	193	123435	123435
		5	756	155.136	40	193	117283	117283
		6	828	146.226	32	193	121075	121075
