# Supplementary material for: Selective androgen receptor degrader (SARD) to overcome antiandrogen resistance in castration-resistant prostate cancer
Source: eLife journal article supplement (doi:10.7554/elife.70700), 2023-01-19
Supplement: data2 [file Figure 5-figure supplement 1A-G.xls]

## Sheet: Figure 5-figure supplement 1A
	Analysis of figure 5A
			Area	Mean	Min	Max	IntDen			original ratio
	actin	1	810	168.995	3	252	106886				AR/actin
		2	494	214.536	11	248	105981			1	0.497951
		3	560	168.891	9	249	94579			2	0.376634
		4	444	191.752	17	250	85138			3	0.145497
		5	600	201.64	11	252	120984			4	0.362118
										5	0.33335
										Relative ratio
	AR	1	360	147.844	31	242	53224				AR/actin
		2	297	100.727	27	169	39916			1	1
		3	224	83.754	31	124	13761			2	0.756368
		4	240	128.458	43	175	30830			3	0.292193
		5	248	162.621	63	233	40330			4	0.727218
										5	0.669444

## Sheet: Figure 5-figure supplement 1B-C
											original ratio
			Area	Mean	Min	Max	IntDen	RawIntDen				AR/actin	ARV7/actin
		1	407	137.609	17	250	56007	56007			1	0.399879	0.75728
	actin	2	370	153.965	27	237	56967	56967			2	0.418295	0.715098
		3	297	178.714	34	251	53078	53078			3	0.110592	0.397528
		4	374	174.444	26	251	65242	65242			4	0.227675	0.552006
		5	380	187.979	41	251	71432	71432			5	0.273505	0.573062
											Relative ratio
		1	280	79.986	15	161	22396	22396				AR/actin	ARV7/actin
	ar	2	385	61.894	3	149	23829	23829			1	0.999996	1				0.75728
		3	217	27.051	2	59	5870	5870			2	1.04605	0.944298
		4	216	68.769	18	119	14854	14854			3	0.276563	0.524942
		5	245	79.743	5	162	19537	19537			4	0.569359	0.728933
											5	0.683967	0.756738
		6	338	125.482	42	182	42413	42413
	arv7	7	324	125.731	65	169	40737	40737
		8	324	65.123	29	100	21100	21100
		9	364	98.94	35	147	36014	36014
		10	300	136.45	44	194	40935	40935

## Sheet: Figure 5-figure supplement 1D
			Area	Mean	Min	Max	IntDen	RawIntDen			original ratio
	actin	1	468	149.838	27	250	70124	70124				AR/actin
		2	432	191.734	47	251	82829	82829			1	0.992927
		3	330	181.752	55	251	59978	59978			2	1.04566
		4	418	163	29	250	68134	68134			3	0.47164
		5	390	142.295	18	250	55495	55495			4	0.636334
											5	0.571205
	ar	1	418	166.574	38	247	69628	69628
		2	504	171.847	42	246	86611	86611			Relative ratio
		3	217	130.359	55	167	28288	28288				AR/actin
		4	296	146.473	59	188	43356	43356			1	0.999997		0.99293
		5	297	106.731	47	154	31699	31699			2	1.05311
											3	0.474998
											4	0.640865
											5	0.575272

## Sheet: Figure 5-figure supplement 1E
	Analysis of figure 5D									original ratio
			Area	Mean	Min	Max	IntDen	RawIntDen			AR/actin
	actin	1	588	195.389	15	248	114889	114889		1	0.56236
		2	462	196.565	54	246	90813	90813		2	0.494257
		3	574	165.948	37	246	95254	95254		3	0.458847
		4	546	158.311	35	248	86438	86438		4	0.462193
		5	494	151.727	19	251	74953	74953		5	0.513362
		6	518	162.938	24	251	84402	84402		6	0.181963
		7	420	166.474	22	251	69919	69919		7	0.132582
		8	520	153.208	22	248	79668	79668		8	1.01907
		9	532	167.758	41	247	89247	89247		9	0.666801
		10	480	193.321	63	246	92794	92794		10	0.268951
		11	494	184.935	49	247	91358	91358		11	0.264772
		12	492	209.305	43	247	102978	102978		12	0.161316
		13	533	188.417	38	247	100426	100426		13	0.0559616
		14	896	146.215	5	251	131009	131009		14	0.0216016
										Relative ratio
											AR/actin
	ar	1	370	174.619	25	246	64609	64609		1	1		0.56236
		2	315	142.492	14	245	44885	44885		2	0.878899
		3	300	145.69	33	245	43707	43707		3	0.815931
		4	297	134.515	22	244	39951	39951		4	0.82188
		5	297	129.556	19	243	38478	38478		5	0.91287
		6	217	70.774	24	121	15358	15358		6	0.323569
		7	210	44.143	18	80	9270	9270		7	0.23576
		8	420	193.302	20	244	81187	81187		8	0.999967		1.0191
		9	270	220.407	94	245	59510	59510		9	0.654304
		10	150	166.38	67	246	24957	24957		10	0.26391
		11	216	111.986	14	216	24189	24189		11	0.259809
		12	204	81.431	21	148	16612	16612		12	0.158293
		13	162	34.691	8	63	5620	5620		13	0.0549128
		14	161	17.578	0	49	2830	2830		14	0.0211967

## Sheet: Figure 5-figure supplement 1F-G
	Analysis of figure 5E
			Area	Mean	Min	Max	IntDen	RawIntDen				original ratio	LNCaP	VCaP
	actin	1	484	134.944	10	248	65313	65313		lncap			AR/actin	AR/actin
		2	451	135.94	16	244	61309	61309				1	0.654739	1.17118
		3	429	124.119	16	242	53247	53247				2	0.575071	1.46775
		4	637	122.367	12	246	77948	77948				3	0.347832	0.293977
												4	0.566455	0.749511
	ar	1	270	158.381	32	251	42763	42763		lncap
		2	286	123.276	30	215	35257	35257				Relative ratio	LNCaP	VCaP
		3	196	94.495	25	172	18521	18521					AR/actin	AR/actin
		4	256	172.477	48	250	44154	44154				1	0.999999	0.999986		0.65474	1.1712
												2	0.878319	1.2532
												3	0.531252	0.251005
												4	0.86516	0.639951
	actin	1	390	148.528	49	221	57926	57926		vcap
		2	304	163.493	42	240	49702	49702
		3	304	193.188	62	244	58729	58729
		4	410	169.561	31	245	69520	69520
	ar	1	340	199.535	49	249	67842	67842
		2	384	189.974	48	248	72950	72950
		3	128	134.883	46	250	17265	17265
		4	306	170.281	35	249	52106	52106
