# Supplementary material for: Selective androgen receptor degrader (SARD) to overcome antiandrogen resistance in castration-resistant prostate cancer
Source: eLife journal article supplement (doi:10.7554/elife.70700), 2023-01-19
Supplement: data2 [file Figure 6-figure supplement 1C-D.xls]

## Sheet: Figure 6-figure supplement 1C
	Analysis of figure 6E
			Area	Mean	Min	Max	IntDen	RawIntDen				original ratio
		1	1000	177.389	6	243	177389	177389					clPARP/actin
		2	1144	171.51	16	244	196207	196207		VCaP		1	0.0375221
	actin	3	960	188.507	32	244	180967	180967				2	0.273344
		4	1056	174.673	34	245	184455	184455				3	0.462035
		5	936	194.069	25	246	181649	181649				4	0.312483
												5	0.116323
		1	332	20.048	2	30	6656	6656
	cl parp	2	732	73.268	13	157	53632	53632				Relative ratio
		3	684	122.241	27	241	83613	83613		VCaP			clPARP/actin
		4	728	79.174	10	173	57639	57639				1	1
		5	492	63.272	5	136	21130	31130				2	7.2849
												3	12.3137
												4	8.32799
												5	3.10013

## Sheet: Figure 6-figure supplement 1D
	Analysis of figure 6F
			Area	Mean	Min	Max	IntDen	RawIntDen		original ratio
		1	736	152.886	31	246	112524	112524			clPARP/actin
	actin	2	700	174.957	30	248	122470	122470		1	0.111416
		3	552	180.447	43	248	99607	99607		2	0.212076
		4	644	156.674	37	248	100898	100898		3	0.603994
		5	588	178.459	49	249	104934	104934		4	0.19151
										5	0.0772676
										Relative ratio
		1	460	27.254	1	48	12537	12537			clPARP/actin
		2	504	51.534	20	96	25973	25973		1	1
	clPARP	3	480	125.338	32	230	60162	60162		2	1.90346
		4	400	48.308	8	95	19323	19323		3	5.42107
		5	312	25.987	1	55	8108	8108		4	1.71888
										5	0.693506
