# Supplementary material for: Selective androgen receptor degrader (SARD) to overcome antiandrogen resistance in castration-resistant prostate cancer
Source: eLife journal article supplement (doi:10.7554/elife.70700), 2023-01-19
Supplement: data2 [file Figure 7-figure supplement 2ACC.xls]

## Sheet: Figure S10A-C
	Analysis of figure 7D
				Area	Mean	Min	Max	IntDen	RawIntDen			original ratio
			1	1040	73.42	4	144	76357	76357				AR/actin	ARV7/actin	PSA/actin
			2	1008	60.219	1	131	60701	60701				0.428873	1.08021	1.01265
			3	1056	85.943	1	158	90756	90756				0.403901	1.83798	1.30903
		AR	4	840	25.946	4	51	21795	21795				0.592035	1.81983	1.30816
			5	756	30.765	1	51	23258	23258				0.122106	0.608763	0.495185
			6	756	35.819	3	57	27079	27079				0.138039	0.715275	0.230882
			7	640	32.828	1	64	21010	21010				0.177274	0.728337	0.245994
			8	792	36.496	4	60	28905	28905				0.118908	0.468801	0.03016
			9	864	34.17	0	56	29523	29523				0.162938	0.430019	0.295143
													0.148718	0.420238	0.259203
			19	1836	104.75	2	211	192321	192321			Relative ratio
			20	2356	117.243	13	189	276225	276225				AR/actin	ARV7/actin	PSA/actin
		ARV7	21	2320	120.246	11	183	278971	278971				0.912496	0.683675	0.836904		1.21
			13	1012	107.372	22	201	108660	108660				0.859363	1.16328	1.08184
			14	1352	89.139	12	185	120516	120516				1.25965	1.15179	1.08113
			15	1152	96.576	13	174	111255	111255				0.259799	0.385293	0.409244
			16	1104	75.03	13	138	82833	82833				0.293699	0.452706	0.190811
			17	1012	75.38	9	123	76285	76285				0.377179	0.460973	0.2033
			18	1056	79	9	146	83424	83424				0.252996	0.29671	0.0249256
													0.346676	0.272164	0.243919
													0.316422	0.265974	0.214218
			1	1120	160.977	11	226	180294	180294
			2	1288	152.741	18	220	196730	196730
		PSA	3	1232	162.772	14	221	200535	200535
			4	792	111.6	26	224	88387	88387
			5	760	51.186	12	114	38901	38901
			6	900	41.751	3	111	37576	37576
			7	532	10.017	0	28	5329	5329
			8	792	66.109	5	174	52358	52358
			9	800	64.32	4	175	51456	51456
			1	979	181.86	33	240	178041	178041
		actin	2	877	171.365	55	237	150287	150287
			3	857	178.874	56	237	153295	153295
			4	1078	165.578	50	237	178493	178493
			5	1019	165.347	47	236	168489	168489
			6	863	177.001	58	236	152752	152752
			7	942	187.57	62	237	176691	176691
			8	920	192.825	70	238	177399	177399
			9	1333	148.924	34	241	198516	198516
