# Supplementary material for: Selective androgen receptor degrader (SARD) to overcome antiandrogen resistance in castration-resistant prostate cancer
Source: eLife journal article supplement (doi:10.7554/elife.70700), 2023-01-19
Supplement: data2 [file Figure 8-figure supplement 2A.xls]

## Sheet: Figure 8-figure supplement 2A
Cell lines	PC-3
Plasmids	PSA 100 ng	wt-AR 20 ng	Renilla 3 ng
Firefly (PSA-luc)
89440	34089	30961	18042	10016	11922	53567		95439	20501	29260	11274
54085	13870	44839	11596	9761	23611	19710		100371	11161	26312	10752
71600	8339	56210	24293	9857	12315	37860		65916	25020	40649	16880
Renilla
4082523	4260894	2528161	3067465	1538968	1494875	3957471		4311717	4506517	3707557	2649757
3175930	4210412	2771164	2974370	1247335	3077175	3371946		4630898	5073310	5251101	2094501
3828341	3845829	3520627	3468208	3088700	3815603	4274630		4110574	5190930	4962140	3999391
Firefly/Renilla
0.021908	0.00800043	0.0122465	0.00588173	0.00650826	0.00797525	0.0135357		0.0221348	0.00454919	0.00789199	0.00425473
0.0170297	0.00329421	0.0161806	0.00389864	0.00782548	0.00767295	0.00584529		0.0216742	0.00219994	0.00501076	0.00513344
0.0187026	0.00216832	0.0159659	0.00700448	0.00319131	0.00322754	0.00885691		0.0160357	0.00481995	0.00819183	0.00422064
DHT 5 nM	ENZa 5 μM	ZL-1 1 μM	ZL-2 1 μM	ZL-3 1 μM	ZL-4 1 μM	ZL-5 1 μM		DHT 5 nM	ENZa 5 μM	ZL-6 1 μM	ZL-7 1 μM
% of DHT group
114.045	41.6472	63.7504	30.6181	33.8795	41.5161	70.4616		110.951	22.803	39.5588	21.327
88.65	17.1484	84.2299	20.2949	40.7365	39.9425	30.4284		108.643	11.0273	25.1166	25.7315
97.3588	11.2875	83.1125	36.4627	16.6128	16.8013	46.1057		80.3795	24.1601	41.0618	21.1561
DHT 5 nM	ENZa 5 μM	ZL-1 1 μM	ZL-2 1 μM	ZL-3 1 μM	ZL-4 1 μM	ZL-5 1 μM		DHT 5 nM	ENZa 5 μM	ZL-6 1 μM	ZL-7 1 μM
