# Supplementary material for: Selective androgen receptor degrader (SARD) to overcome antiandrogen resistance in castration-resistant prostate cancer
Source: eLife journal article supplement (doi:10.7554/elife.70700), 2023-01-19
Supplement: data2 [file Figure 8-figure supplement 3A-D.xls]

## Sheet: Figure 8-figure supplement 3A-D
			Analysis of figure 8C
			part 1	Area	Mean	Min	Max	IntDen	RawIntDen
	actin-1	2	actin	430	119.433	14	231	51356	51356
		3		492	104.565	4	243	51446	51446			Relative ratio		part 1			part 2
		4		492	94.89	6	242	46686	46686					AR/actin	psa/actin		AR/actin	psa/actin
		5		484	150.029	14	243	72614	72614				1	1	1		1	1
		6		360	128.092	29	242	46113	46113				2	0.395152	0.246161		0.248497	0.0832844
		7		360	159	17	243	57240	57240				3	0.69267	0.29013		0.331952	0.133155
		8		370	153.046	13	244	56627	56627				4	0.537871	0.273446		0.382406	0.452414
		9		378	123.365	22	243	46632	46632				5	0.391755	0.110012		0.316891	0.0520369
		10		328	147.582	23	237	48407	48407				6	0.448288	0.177918		0.626492	0.121629
		11		440	153.177	23	240	67398	67398				7	0.55576	0.334575		0.239392	0.528204
		12		370	181.338	27	239	67095	67095				8	0.145136	0.144579		0.096304	0.037653
		13		360	188.453	38	232	67843	67843				9	0.346665	0.152726		0.290506	0.0709934
		14		360	204.022	35	225	73448	73448				10	0.384908	0.29851		0.253821	0.188759
													11	0.327595	0.154095		0.184095	0.0532885
													12	0.50409	0.182583		0.160471	0.134317
													13	0.458569	0.363277		0.319233	0.197833
	ar-1	2	AR	504	160.438	28	243	80861	80861
		3		279	108.706	41	176	20329	30329
		4		352	120.278	31	191	32338	42338
		5		306	127.637	32	195	39057	39057
		6		240	75.271	30	115	18065	18065
		7		248	103.468	25	148	25660	25660
		8		270	116.559	38	167	31471	31471
		9		174	38.897	18	54	6768	6768
		10		300	55.937	13	91	16781	16781
		11		279	92.982	21	155	25942	25942
		12		288	76.319	5	143	21980	21980
		13		300	113.997	30	223	34199	34199
		14		350	96.231	16	172	33681	33681
		1	PSA	720	181.162	19	251	130437	130437
		2		546	190.419	57	250	103969	103969
		3		492	186.866	56	250	91938	91938
		4		533	176.099	28	251	93861	93861
		5		559	140.605	32	247	78598	78598
		6		494	140.901	29	225	69605	69605
	actin-2	7		574	156.589	25	251	89882	89882
		8		504	160.351	37	251	80817	80817
		9		440	149.95	33	248	65978	65978
		10		528	190.699	56	250	100689	100689
		11		630	177.798	32	250	112013	112013
		12		600	201.563	68	249	120938	120938
		13		644	220.652	46	251	142100	142100
			part 2
		1	actin	396	167.051	15	249	66152	66152
	ar-2	2		310	109.148	44	187	25836	33836
		3		264	153.481	28	248	30519	40519
		4		280	142.475	44	247	35893	39893
		5		224	111.192	46	165	24907	24907
		6		232	187.961	45	248	43607	43607
		7		261	82.441	32	167	21517	21517
		8		168	46.327	27	67	7783	7783
		9		240	79.862	28	136	19167	19167
		10		189	135.222	52	204	25557	25557
		11		196	105.209	40	170	20621	20621
		12		232	83.651	18	184	19407	19407
		13		350	129.609	18	250	45363	45363
	psa-1	2	AR	480	182.721	28	250	87706	87706
		3		297	42.64	17	75	12664	12664
		4		243	55.741	19	84	13545	13545
		5		174	114.115	40	179	19856	19856
		6		176	28.824	8	47	5073	5073
		7		200	50.92	15	75	10184	10184
		8		182	104.099	38	154	18946	18946
		9		161	41.876	20	56	6742	6742
		10		196	37.719	17	56	7393	7393
		11		261	77.084	21	125	20119	20119
		12		290	35.652	9	63	10339	10339
		13		261	47.46	15	76	12387	12387
		14		288	92.646	39	153	26682	26682
	psa-2	1	PSA	420	174.448	13	251	73268	73268
		14		320	27.059	1	102	8659	8659
		3		200	61.21	31	104	12242	12242
		4		224	189.571	57	250	42464	42464
		5		176	23.239	3	59	4090	4090
		6		192	44.094	13	85	8466	8466
		7		248	191.435	44	251	47476	47476
		8		261	11.659	1	33	3043	3043
		9		261	17.946	0	50	4684	4684
		10		330	57.594	18	99	19006	19006
		11		186	32.091	10	61	5969	5969
		12		312	52.064	7	102	16244	16244
		13		340	82.682	16	165	28112	28112
