# Supplementary material for: Selective androgen receptor degrader (SARD) to overcome antiandrogen resistance in castration-resistant prostate cancer
Source: eLife journal article supplement (doi:10.7554/elife.70700), 2023-01-19
Supplement: data3 [file Figure 1B.xls]

## Sheet: Figure 1B
Cell lines	PC-3
Plasmids	PSA 100 ng	wt-AR 20 ng	Renilla 3 ng
Firefly (PSA-luc)
147420	302018	85416	32684	95071	133401
59635	307713	59028	39600	58639	35142
79443	304809	51032	43012	83287	52396
Renilla
57671396	34690704	43767604	25698346	28331688	27838138
38286876	41696916	42087148	32325076	35687120	9039555
45500244	45116940	41065380	32779384	32974530	8887290
Firefly/Renilla
0.00255621	0.00870602	0.00195158	0.00127183	0.00335564	0.00479202
0.00155758	0.00737975	0.00140252	0.00122506	0.00164314	0.00388758
0.00174599	0.00675598	0.0012427	0.00131217	0.0025258	0.00589561
DMSO	DHT 5 nM	ENZa 5 μM	Z15 5 μM	Z15 1 μM	Z15 0.2 μM
% of DHT group
33.5725	114.342	25.6315	16.7039	44.072	62.937
20.4568	96.9235	18.4203	16.0895	21.5805	51.0583
22.9313	88.731	16.3213	17.2336	33.1731	77.4312
DMSO	DHT 5 nM	ENZa 5 μM	Z15 5 μM	Z15 1 μM	Z15 0.2 μM
