# Supplementary material for: Selective androgen receptor degrader (SARD) to overcome antiandrogen resistance in castration-resistant prostate cancer
Source: eLife journal article supplement (doi:10.7554/elife.70700), 2023-01-19
Supplement: data3 [file Figure 1C.xls]

## Sheet: Figure 1C
Cell lines	LNCaP
Plasmids	PSA 100 ng	Renilla 3 ng
Firefly (PSA-luc)
28879	200283	13825	2073	18795	39027
14698	101125	16261	1405	13389	54804
9828	126944	8778	2316	16608	83446
Renilla
4908825	7881626	2362891	1609883	3490760	5253607
4371575	4869295	3365214	1073258	3431597	6309074
3838272	6527539	2548649	791367	3129459	8151280
Firefly/Renilla
0.00588308	0.0254114	0.00585088	0.00128767	0.00538421	0.00742861
0.00336217	0.0207679	0.00483208	0.0013091	0.00390168	0.00868654
0.00256053	0.0194475	0.00344418	0.00292658	0.00530699	0.0102372
DMSO	DHT 5 nM	ENZa 5 μM	Z15 5 μM	Z15 1 μM	Z15 0.2 μM
% of DHT group
26.8933	116.163	26.7462	5.88634	24.6129	33.9584
15.3695	94.9363	22.0889	5.98428	17.8358	39.7088
11.7049	88.9002	15.7444	13.3783	24.2598	46.7972
DMSO	DHT 5 nM	ENZa 5 μM	Z15 5 μM	Z15 1 μM	Z15 0.2 μM
