# Supplementary material for: Selective androgen receptor degrader (SARD) to overcome antiandrogen resistance in castration-resistant prostate cancer
Source: eLife journal article supplement (doi:10.7554/elife.70700), 2023-01-19
Supplement: data3 [file Figure 1D.xls]

## Sheet: Figure 1D
Cell lines	VCaP
Plasmids	PSA 150 ng	Renilla 3 ng
Firefly (PSA-luc)
17394	49309	72679	9497	9100	12503
19288	45621	91042	12302	13745	16178
4786	44137	31873	17252	24451	18578
Renilla
33548712	27346230	28521460	27870774	29246728	29715000
25670632	37404260	37559036	30700086	26250746	35527796
20369552	33983172	32602090	28436684	33598332	38002084
Firefly/Renilla
0.00051847	0.00180314	0.00254822	0.000340751	0.000311146	0.000420764
0.000751364	0.00121967	0.00242397	0.000400715	0.000523604	0.000455362
0.000234959	0.00129879	0.000977637	0.000606681	0.000727744	0.000488868
DMSO	DHT 5 nM	ENZa 5 μM	Z15 5 μM	Z15 1 μM	Z15 0.2 μM
% of DHT group
36.0049	125.218	176.96	23.6633	21.6074	29.2197
52.1781	84.6996	168.331	27.8275	36.3614	31.6223
16.3166	90.1937	67.8914	42.1306	50.5378	33.9492
DMSO	DHT 5 nM	ENZa 5 μM	Z15 5 μM	Z15 1 μM	Z15 0.2 μM
