# Supplementary material for: Selective androgen receptor degrader (SARD) to overcome antiandrogen resistance in castration-resistant prostate cancer
Source: eLife journal article supplement (doi:10.7554/elife.70700), 2023-01-19
Supplement: data3 [file Figure 1E.xls]

## Sheet: Figure 1E
Cell lines	22Rv1
Plasmids	PSA 100 ng	Renilla 3 ng
Firefly (PSA-luc)
404947	717021	322458	110730	486613	542599
212284	536158	198491	66230	370203	375260
154255	655740	182925	64829	306506	483730
Renilla
166234304	187241840	185512304	71668336	178061136	174047072
173305680	182087984	177198992	66224732	182759296	166971184
162602496	190088016	188899328	70113240	185344512	184625456
Firefly/Renilla
0.002436	0.00382938	0.0017382	0.00154503	0.00273284	0.00311754
0.00122491	0.0029445	0.00112016	0.00100008	0.00202563	0.00224745
0.000948663	0.00344967	0.000968373	0.000924633	0.00165371	0.00262006
DMSO	DHT 5 nM	ENZa 5 μM	Z15 5 μM	Z15 1 μM	Z15 0.2 μM
% of DHT group
71.4789	112.365	51.0036	45.3355	80.189	91.4772
35.9422	86.3996	32.8685	29.3451	59.4375	65.9464
27.8364	101.223	28.4147	27.1312	48.5243	76.8797
DMSO	DHT 5 nM	ENZa 5 μM	Z15 5 μM	Z15 1 μM	Z15 0.2 μM
