# Supplementary material for: Selective androgen receptor degrader (SARD) to overcome antiandrogen resistance in castration-resistant prostate cancer
Source: eLife journal article supplement (doi:10.7554/elife.70700), 2023-01-19
Supplement: data3 [file Figure 1F.xls]

## Sheet: Figure 1F
Cell lines	LNCaP
Plasmids	PSA 100 ng	Renilla 3 ng
Enzalutamide treatment
Firefly (PSA-luc)
15087	330417	28168	16077	18515	36322	464542		14719	366798	14267	182334	146265	99940
27412	307730	28796	8657	15567	71446	313928		18327	324910	20103	153271	181129	144202
18306	461424	37400	19531	38964	112877	342274		13419	308183	13477	225434	298787	215156
Renilla
1508053	1906669	1366768	1251276	1208690	1287340	3517632		3510469	4413722	3262525	3533636	2765858	1476732
1406531	1836247	1509100	978972	864091	1466788	3279914		2844875	5180174	3696192	3342155	3217450	2202370
1667031	2811630	1677953	1515499	1506994	2336100	2970199		2720127	3890001	4649840	4646048	4716516	3374477
Firefly/Renilla
0.0100043	0.173295	0.0206092	0.0128485	0.0153182	0.0282148	0.132061		0.00419289	0.083104	0.00437299	0.0515995	0.0528823	0.0676765
0.0194891	0.167586	0.0190816	0.00884295	0.0180155	0.0487092	0.0957123		0.00644211	0.0627218	0.00543884	0.0458599	0.0562958	0.0654758
0.0109812	0.164113	0.0222891	0.0128875	0.0258554	0.0483186	0.115236		0.00493323	0.0792244	0.00289838	0.0485217	0.0633491	0.0637598
DMSO	DHT 5 nM	ENZa 5 μM	ENZa 10 μM	ENZa 2.5 μM	ENZa 0.625 μM	ENZa 0.156 μM		DMSO	DHT 5 nM	ENZa 10 μM	ENZa 0.04 μM	ENZa 0.01 μM	ENZa 0.0025 μM
% of DHT group
5.94326	102.95	12.2433	7.63291	9.10012	16.7616	78.4536		5.59052	110.805	5.83066	68.7994	70.5098	90.2353
11.5779	99.5582	11.3358	5.25334	10.7025	28.9367	56.8599		8.58948	83.6291	7.25179	61.1466	75.0611	87.3011
6.52361	97.4946	13.2413	7.65609	15.36	28.7047	68.4584		6.57763	105.633	3.86451	64.6956	84.4655	85.0131
DMSO	DHT 5 nM	ENZa 5 μM	ENZa 10 μM	ENZa 2.5 μM	ENZa 0.625 μM	ENZa 0.156 μM		DMSO	DHT 5 nM	ENZa 10 μM	ENZa 0.04 μM	ENZa 0.01 μM	ENZa 0.0025 μM
Z15 treatment
Firefly (PSA-luc)
66682	1332048	114387	2278	36008	100421	1026533		77765	1590129	113337	1140594	1762403	1689760
110370	1548427	130162	4761	98472	216346	1322301		70684	2069672	113211	1382593	642690	1553191		10
80284	1880313	79552	5079	101162	362657	1202373		75093	1811892	152815	1636173	878020	1752736		2.5
															0.625
Renilla															0.15625
23905352	32236190	33750872	2581200	11918984	7778260	38767752		26736408	36769284	33418310	40222780	41243420	43289164		0.0390625
26454938	36355376	34469888	2448681	24774614	20681280	45005120		30129852	50621180	35911336	47028532	20457616	39277144		0.00976562
24910532	41674712	33838024	4015760	31256668	32213778	44702172		29915132	45592668	33203784	49016508	33672864	48072232		0.00244141
Firefly/Renilla
0.00278942	0.0413215	0.00338916	0.000882535	0.00302106	0.0129105	0.026479		0.00290858	0.0432461	0.00339146	0.0283569	0.0427317	0.0390342
0.004172	0.0425914	0.00377611	0.00194431	0.00397471	0.010461	0.0293811		0.00234598	0.0408855	0.00315251	0.029399	0.0314157	0.0395444
0.00322289	0.0451188	0.00235096	0.00126477	0.00323649	0.0112578	0.0268974		0.0025102	0.0397409	0.00460234	0.03338	0.026075	0.0364605
DMSO	DHT 5 nM	ENZa 5 μM	Z15 10 μM	Z15 2.5 μM	Z15 0.625 μM	Z15 0.156 μM		DMSO	DHT 5 nM	ENZa 5 μM	Z15 0.04 μM	Z15 0.01 μM	Z15 0.0025 μM
% of DHT group
6.48551	96.0742	7.87993	2.05193	7.02409	30.0174	61.5649		7.04427	104.738	8.21377	68.6774	103.492	94.5368
9.70007	99.0268	8.7796	4.5206	9.24137	24.3222	68.3123		5.68171	99.0203	7.63506	71.2013	76.0855	95.7723
7.49336	104.903	5.46609	2.94063	7.52498	26.1749	62.5376		6.07944	96.2482	11.1464	80.8429	63.1509	88.3034
DMSO	DHT 5 nM	ENZa 5 μM	Z15 10 μM	Z15 2.5 μM	Z15 0.625 μM	Z15 0.156 μM		DMSO	DHT 5 nM	ENZa 5 μM	Z15 0.04 μM	Z15 0.01 μM	Z15 0.0025 μM
