# Supplementary material for: Selective androgen receptor degrader (SARD) to overcome antiandrogen resistance in castration-resistant prostate cancer
Source: eLife journal article supplement (doi:10.7554/elife.70700), 2023-01-19
Supplement: data3 [file Figure 1G.xls]

## Sheet: Figure 1G
Cell lines	PC-3
Plasmids	MMTV 100 ng	Renilla 3 ng
Firefly (MMTV-luc)
70103	497081	92544	237303	275553	398748
45140	591231	106797	248168	351893	360660
37919	629347	66447	297710	285722	524809
Renilla
61503036	114059928	78698752	89047752	93357832	102403072
57030636	137904144	66402404	75679584	114134112	105029744
59655448	144991808	68387592	92195936	114593744	111632424
Firefly/Renilla
0.00113983	0.00435807	0.00117593	0.0026649	0.00295158	0.00389391
0.000791504	0.00428726	0.00160833	0.00327919	0.00308315	0.00343388
0.000635633	0.00434057	0.000971624	0.0032291	0.00249335	0.00470122
DMSO	Dex 100 nM	Mif 1 μM	Z15 5 μM	Z15 1 μM	Z15 0.2 μM
% of Dex group
26.3301	100.671	27.1639	61.5592	68.1815	89.9493
18.2838	99.0358	37.1525	75.7494	71.2209	79.3228
14.6831	100.267	22.4445	74.5923	57.5964	108.598
DMSO	Dex 100 nM	Mif 1 μM	Z15 5 μM	Z15 1 μM	Z15 0.2 μM
