# Supplementary material for: Selective androgen receptor degrader (SARD) to overcome antiandrogen resistance in castration-resistant prostate cancer
Source: eLife journal article supplement (doi:10.7554/elife.70700), 2023-01-19
Supplement: data3 [file Figure 1H.xls]

## Sheet: Figure 1H
Cell lines	PC-3
Plasmids	PSA 100 ng	AR_T877A 50 ng	Renilla 3 ng
Firefly (PSA-luc)
11073	91482	22273	8114	2261	60601	19978
12093	29628	8586	24410	2132	55072	70187
33901	181648	10789	55009	14995	20108	20777
Renilla
2620449	1590146	1190149	464702	258422	3538807	1000858
2080506	1574491	593841	586176	314331	4351358	2213376
5187011	4578696	1979723	3505118	1268394	3373590	1575411
Firefly/Renilla
0.00422561	0.0575306	0.0187145	0.0174607	0.00874926	0.0171247	0.0199609
0.00581253	0.0188175	0.0144584	0.0416428	0.00678266	0.0126563	0.0317104
0.00653575	0.0396724	0.00544975	0.0156939	0.011822	0.00596042	0.0131883
DMSO	DHT 5 nM	ENZa 5 μM	Flu 5 μM	Z15 5 μM	Z15 1 μM	Z15 0.2 μM
% of DHT group
10.9274	148.773	48.3953	45.153	22.6254	44.2842	51.6185
15.0311	48.6618	37.3892	107.688	17.5398	32.7289	82.0025
16.9013	102.592	14.093	40.5842	30.5716	15.4135	34.1047
DMSO	DHT 5 nM	ENZa 5 μM	Flu 5 μM	Z15 5 μM	Z15 1 μM	Z15 0.2 μM
