# Supplementary material for: Selective androgen receptor degrader (SARD) to overcome antiandrogen resistance in castration-resistant prostate cancer
Source: eLife journal article supplement (doi:10.7554/elife.70700), 2023-01-19
Supplement: data3 [file Figure 1I.xls]

## Sheet: Figure 1I
Cell lines	PC-3
Plasmids	PSA 100 ng	AR_F876L 50 ng	Renilla 3 ng
Firefly (PSA-luc)
16760	64356	57703	29226	20869	28674	38793
18172	61855	53416	23214	15400	27065	39729
16905	62148	71881	17930	17491	24819	37400
Renilla
8537674	11799354	13396006	10106193	8797377	10624834	10952863
9214074	13347556	13361344	10782981	9565805	9112218	11043386
8418511	15237225	14919511	10318497	9635443	10728802	10801150
Firefly/Renilla
0.00196306	0.0054542	0.00430748	0.00289189	0.00237218	0.00269877	0.00354181
0.0019722	0.00463418	0.0039978	0.00215284	0.0016099	0.00297019	0.00359754
0.00200807	0.0040787	0.00481792	0.00173766	0.00181528	0.00231331	0.00346259
DMSO	DHT 5 nM	ENZa 5 μM	Bic 5 μM	Z15 5 μM	Z15 1 μM	Z15 0.2 μM
% of DHT group
41.5727	115.506	91.2215	61.2429	50.2369	57.1531	75.0066
41.7662	98.1402	84.6633	45.5916	34.0936	62.9011	76.1867
42.5259	86.3764	102.031	36.7992	38.443	48.99	73.329
DMSO	DHT 5 nM	ENZa 5 μM	Bic 5 μM	Z15 5 μM	Z15 1 μM	Z15 0.2 μM
