# Supplementary material for: Selective androgen receptor degrader (SARD) to overcome antiandrogen resistance in castration-resistant prostate cancer
Source: eLife journal article supplement (doi:10.7554/elife.70700), 2023-01-19
Supplement: data3 [file Figure 2B.xls]

## Sheet: qRT-PCR results
LNCaP cells	ct value
	GAPDH				PSA
DMSO	16.22	16.32	16.49		19.75	19.96	19.84
DHT 5nM	15.99	16.33	16.17		16.95	17.22	16.99
ENZa 5μM	16.19	16.48	16.41		19.97	20.24	20.13
Z15 5μM	17.86	18.3	18.13		23.06	23.17	23.19
Z15 1μM	16.31	16.48	16.38		18.51	18.7	18.57
Z15 0.2μM	16.34	16.4	16.4		18.19	18.45	18.25
LNCaP cells	ct value
	GAPDH				PMEPA1				TMPRSS2
DMSO	16.27	16.46	16.62		25.54	25.53	25.57		23.09	23.04	23.04
DHT 5nM	15.96	16.25	16.28		23.61	23.73	23.96		20.87	21.41	20.78
ENZa 5μM	16.23	16.39	16.58		25.04	25.3	25.22		23.05	23.21	23.12
Z15 5μM	16.8	16.94	17.19		25.63	25.43	25.63		23.53	23.36	23.39
Z15 1μM	16.03	15.96	16.03		24.17	24.35	24.43		22.02	21.9	22.02
Z15 0.2μM	16.38	16.45	16.57		24.75	24.9	24.89		22.35	22.15	22.07
