# Supplementary material for: Selective androgen receptor degrader (SARD) to overcome antiandrogen resistance in castration-resistant prostate cancer
Source: eLife journal article supplement (doi:10.7554/elife.70700), 2023-01-19
Supplement: data3 [file Figure 2C.xls]

## Sheet: qRT-PCR results
22Rv1 cells	ct value
	GAPDH				PSA
DMSO	16.32	16.37	16.41		24.23	24.49	24.45
DHT 5nM	16.08	16.08	16.03		23.23	23.28	23.46
ENZa 5μM	16.04	15.85	15.96		24.4	24.72	24.5
Z15 5μM	16.81	16.99	17		26.96	26.78	26.96
Z15 1μM	16.38	16.56	16.23		23.3	23.56	23.72
Z15 0.2μM	17.03	17.16	17.14		24.61	24.72	24.59
VCaP cells	ct value
	GAPDH				PSA
DMSO	16.76	16.46	16.78		21.74	21.5	21.76
DHT 5nM	16.54	16.47	16.54		19.48	19.52	19.54
ENZa 5μM	16.55	16.55	16.57		20.01	20.05	19.98
Z15 5μM	17.49	17.54	17.66		22.67	22.75	22.78
Z15 1μM	15.53	15.64	15.6		19.2	19.31	19.08
Z15 0.2μM	16.99	17.03	17.03		20.91	20.85	20.75
