# Supplementary material for: Selective androgen receptor degrader (SARD) to overcome antiandrogen resistance in castration-resistant prostate cancer
Source: eLife journal article supplement (doi:10.7554/elife.70700), 2023-01-19
Supplement: data3 [file Figure 4B.xls]

## Sheet: Experiment Summary
C:\Users\Labuser\Desktop\wm\Experiment_1-z15-20180927
ExpDescription: Unassigned
ExperimentType: KINETICS
StartDateTime: 9/27/2018 11:12:35 AM
MachineName: 3R1BR52
UserName: Labuser
PlateName: 180927
PlateName2: Unassigned
Instrument Type: OctetRED96
180927_001.frd (E1)
180927_002.frd (F1)
180927_003.frd (E2)
180927_004.frd (F2)
180927_ExpMethod.fmf
N	Data Name	Assay Time	Flow Rate	Step Type Name	Step Type		Assay Step Number	Step Data Name	Sensor Column	Sample Column	Step Type	Assay Time
1	Baseline	60	1000	Baseline	2		1	Baseline	1	1	Baseline	60
2	Association	60	1000	Association	0		2	Association	1	7	Association	60
3	Dissociation	60	1000	Dissociation	1		3	Dissociation	1	1	Dissociation	60
							4	Baseline	1	2	Baseline	60
							5	Association	1	8	Association	60
							6	Dissociation	1	2	Dissociation	60
							7	Baseline	1	3	Baseline	60
							8	Association	1	9	Association	60
							9	Dissociation	1	3	Dissociation	60
							10	Baseline	1	4	Baseline	60
							11	Association	1	10	Association	60
							12	Dissociation	1	4	Dissociation	60
							13	Baseline	1	5	Baseline	60
							14	Association	1	11	Association	60
							15	Dissociation	1	5	Dissociation	60
							16	Baseline	1	6	Baseline	60
							17	Association	1	12	Association	60
							18	Dissociation	1	6	Dissociation	60
							19	Baseline	2	1	Baseline	60
							20	Association	2	7	Association	60
							21	Dissociation	2	1	Dissociation	60
							22	Baseline	2	2	Baseline	60
							23	Association	2	8	Association	60
							24	Dissociation	2	2	Dissociation	60
							25	Baseline	2	3	Baseline	60
							26	Association	2	9	Association	60
							27	Dissociation	2	3	Dissociation	60
							28	Baseline	2	4	Baseline	60
							29	Association	2	10	Association	60
							30	Dissociation	2	4	Dissociation	60
							31	Baseline	2	5	Baseline	60
							32	Association	2	11	Association	60
							33	Dissociation	2	5	Dissociation	60
							34	Baseline	2	6	Baseline	60
							35	Association	2	12	Association	60
							36	Dissociation	2	6	Dissociation	60
Report Info
SW Name: Octet DataAnalysis
SW Version: 9.0.0.10
Date/Time: 10/15/2018 2:49:15 PM

## Sheet: Sensor Tray
Assay Table					Sensor Location and File Name
Step	Step Name	Step Type	Step Time		Number	Sensor Location	Sensor Type	Sensor Info	File Name
1	Baseline	BASELINE	60.01		1	E1	Anti-GST		C:\Users\Labuser\Desktop\wm\Experiment_1-z15-20180927\180927_001.frd
2	Association	ASSOC	59.99		2	F1	Anti-GST		C:\Users\Labuser\Desktop\wm\Experiment_1-z15-20180927\180927_002.frd
3	Dissociation	DISASSOC	59.99		3	E2	Anti-GST		C:\Users\Labuser\Desktop\wm\Experiment_1-z15-20180927\180927_003.frd
4	Baseline	BASELINE	59.99		4	F2	Anti-GST		C:\Users\Labuser\Desktop\wm\Experiment_1-z15-20180927\180927_004.frd
5	Association	ASSOC	60.01
6	Dissociation	DISASSOC	60.01
7	Baseline	BASELINE	60.01
8	Association	ASSOC	59.99
9	Dissociation	DISASSOC	59.99
10	Baseline	BASELINE	59.99
11	Association	ASSOC	59.99
12	Dissociation	DISASSOC	60.01
13	Baseline	BASELINE	60.01
14	Association	ASSOC	59.99
15	Dissociation	DISASSOC	59.99
16	Baseline	BASELINE	60.01
17	Association	ASSOC	60.01
18	Dissociation	DISASSOC	59.99

## Sheet: Processing Parameters
Processing Parameters
Subtraction Type:	Reference Wells
Align Y:	Yes
	Step to Align:	Baseline
	Time (seconds):	58	59.8
Inter-step Correction:	None
S-G Filtering	ON
Analysis Parameters
Step to Analyze	Association & Dissociation
Model:	1 to 1
Fitting	Local Full
Window of Interest:	Association (secs):	0	59.99
	Dissociation (secs):	0	59.99
Steady State Analysis
	Fit using Data	Req
Sensors Analyzed
	E2 - (F2)

## Sheet: Sensor Data
Well Number	Well Location	Sensor	Sensor Type	Sensor Info	File Name
1	A1	Empty
2	B1	Empty
3	C1	Empty
4	D1	Empty
5	E1	Reference Sensor	Anti-GST		C:\Users\Labuser\Desktop\wm\Experiment_1-z15-20180927\180927_001.frd
6	F1	Reference Sensor	Anti-GST		C:\Users\Labuser\Desktop\wm\Experiment_1-z15-20180927\180927_002.frd
7	G1	Empty
8	H1	Empty
9	A2	Empty
10	B2	Empty
11	C2	Empty
12	D2	Empty
13	E2	Ligand Sensor	Anti-GST		C:\Users\Labuser\Desktop\wm\Experiment_1-z15-20180927\180927_003.frd
14	F2	Ligand Sensor	Anti-GST		C:\Users\Labuser\Desktop\wm\Experiment_1-z15-20180927\180927_004.frd
15	G2	Empty
16	H2	Empty
17	A3	Empty
18	B3	Empty
19	C3	Empty
20	D3	Empty
21	E3	Empty
22	F3	Empty
23	G3	Empty
24	H3	Empty
25	A4	Empty
26	B4	Empty
27	C4	Empty
28	D4	Empty
29	E4	Empty
30	F4	Empty
31	G4	Empty
32	H4	Empty
33	A5	Empty
34	B5	Empty
35	C5	Empty
36	D5	Empty
37	E5	Empty
38	F5	Empty
39	G5	Empty
40	H5	Empty
41	A6	Empty
42	B6	Empty
43	C6	Empty
44	D6	Empty
45	E6	Empty
46	F6	Empty
47	G6	Empty
48	H6	Empty
49	A7	Empty
50	B7	Empty
51	C7	Empty
52	D7	Empty
53	E7	Empty
54	F7	Empty
55	G7	Empty
56	H7	Empty
57	A8	Empty
58	B8	Empty
59	C8	Empty
60	D8	Empty
61	E8	Empty
62	F8	Empty
63	G8	Empty
64	H8	Empty
65	A9	Empty
66	B9	Empty
67	C9	Empty
68	D9	Empty
69	E9	Empty
70	F9	Empty
71	G9	Empty
72	H9	Empty
73	A10	Empty
74	B10	Empty
75	C10	Empty
76	D10	Empty
77	E10	Empty
78	F10	Empty
79	G10	Empty
80	H10	Empty
81	A11	Empty
82	B11	Empty
83	C11	Empty
84	D11	Empty
85	E11	Empty
86	F11	Empty
87	G11	Empty
88	H11	Empty
89	A12	Empty
90	B12	Empty
91	C12	Empty
92	D12	Empty
93	E12	Empty
94	F12	Empty
95	G12	Empty
96	H12	Empty

## Sheet: Sample Data
Well Number	Well Location	Well Type	Sample ID	Description	Molar Conc.
1	A1	unset			65535
2	B1	unset			65535
3	C1	unset			65535
4	D1	unset			65535
5	E1	Buffer			65535
6	F1	Reference Well			65535
7	G1	unset			65535
8	H1	unset			65535
9	A2	unset			65535
10	B2	unset			65535
11	C2	unset			65535
12	D2	unset			65535
13	E2	Buffer			65535
14	F2	Reference Well			65535
15	G2	unset			65535
16	H2	unset			65535
17	A3	unset			65535
18	B3	unset			65535
19	C3	unset			65535
20	D3	unset			65535
21	E3	Buffer			65535
22	F3	Reference Well			65535
23	G3	unset			65535
24	H3	unset			65535
25	A4	unset			65535
26	B4	unset			65535
27	C4	unset			65535
28	D4	unset			65535
29	E4	Buffer			65535
30	F4	Reference Well			65535
31	G4	unset			65535
32	H4	unset			65535
33	A5	unset			65535
34	B5	unset			65535
35	C5	unset			65535
36	D5	unset			65535
37	E5	Buffer			65535
38	F5	Reference Well			65535
39	G5	unset			65535
40	H5	unset			65535
41	A6	unset			65535
42	B6	unset			65535
43	C6	unset			65535
44	D6	unset			65535
45	E6	Buffer			65535
46	F6	Reference Well			65535
47	G6	unset			65535
48	H6	unset			65535
49	A7	unset			65535
50	B7	unset			65535
51	C7	unset			65535
52	D7	unset			65535
53	E7	Sample			6.25
54	F7	Reference Well			65535
55	G7	unset			65535
56	H7	unset			65535
57	A8	unset			65535
58	B8	unset			65535
59	C8	unset			65535
60	D8	unset			65535
61	E8	Sample			12.5
62	F8	Reference Well			65535
63	G8	unset			65535
64	H8	unset			65535
65	A9	unset			65535
66	B9	unset			65535
67	C9	unset			65535
68	D9	unset			65535
69	E9	Sample			62.5
70	F9	Reference Well			65535
71	G9	unset			65535
72	H9	unset			65535
73	A10	unset			65535
74	B10	unset			65535
75	C10	unset			65535
76	D10	unset			65535
77	E10	Sample			125
78	F10	Reference Well			65535
79	G10	unset			65535
80	H10	unset			65535
81	A11	unset			65535
82	B11	unset			65535
83	C11	unset			65535
84	D11	unset			65535
85	E11	Sample			250
86	F11	Reference Well			65535
87	G11	unset			65535
88	H11	unset			65535
89	A12	unset			65535
90	B12	unset			65535
91	C12	unset			65535
92	D12	unset			65535
93	E12	Sample			500
94	F12	Reference Well			65535
95	G12	unset			65535
96	H12	unset			65535

## Sheet: Raw and Aligned Data
Sensor Location	Color	Sensor	Sensor Type	Sensor Info
E1		Reference Sensor	Anti-GST
F1		Reference Sensor	Anti-GST
E2		Ligand Sensor	Anti-GST
F2		Ligand Sensor	Anti-GST

## Sheet: Result Table
Selected	Include	Index	Color	Sensor Location	Sensor Type	Sensor Info	Replicate Group	Baseline Loc.	Assoc. (Sample) Loc.	Sample ID	Dissoc. Loc.	Loading Well Location	Loading Sample ID	Cycle	Conc. (µM)	Response	KD (M)	KD Error	kon(1/Ms)	kon Error	kdis(1/s)	kdis Error	RMax	RMax Error	kobs(1/s)	Req	Req/Rmax(%)	Full X^2	Full R^2	SSG KD	SSG Rmax	SSG R^2
x	x	0	-14261055	E2	Anti-GST		N/A	E1	E7		E1			1	6.25	0.0962	8.032e-07	3.443e-07	332900	139700	0.2674	0.02342	0.1116	0.0058	2.348	0.0989	88.6	0.0136	0.9714
x	x	1	-3721216	E2	Anti-GST		N/A	E2	E8		E2			1	12.5	0.1731	1.568e-06	3.996e-07	124000	30620	0.1944	0.01217	0.193	0.0061	1.744	0.1715	88.9	0.0298	0.9775
x	x	2	-12144190	E2	Anti-GST		N/A	E3	E9		E3			1	62.5	0.2806	5.034e-06	5.388e-07	18610	1937	0.09369	0.002345	0.301	0.0032	1.257	0.2786	92.5	0.0301	0.9915
x		3	-8992723	E2	Anti-GST		N/A	E4	E10		E4			1	125	0.3003
x		4	-1264826	E2	Anti-GST		N/A	E5	E11		E5			1	250	0.3223
x	x	5	-4545552	E2	Anti-GST		N/A	E6	E12		E6			1	500	0.4151	2.942e-05	5.911e-06	3250	640.9	0.09562	0.003651	0.4323	0.0064	1.72	0.4083	94.4	0.1242	0.98

## Sheet: Steady State
							Results
								Data Used	Reqs
								Y Weighting
								Chi^2/DoF	0.000693466
								R^2	0.974512
								RMax	0.409875	0.0194524
								KD	2.1e-05	±3.6E-06M

## Sheet: Analysis Parameters
2;0:Association; 1: Dissociation; 2: both
1;1: 1:1 model; 2: 2:1; 3: Mass Transport
0;0:local; 1:global
0;0:Full; 1: partial
0;0:Sensor; 1: color; 2:...
1;0:linked; 1: unlinked by sensor; 2: unlinked by compound; 3: ...
1;0: use entire step, 1:use WOI
0;secs, Assoication starts
59.994;Association step ends
0;Dissociation step starts
59.994;Dissociation step ends
0;0: use Req; 1:Response;
