# Supplementary material for: Selective androgen receptor degrader (SARD) to overcome antiandrogen resistance in castration-resistant prostate cancer
Source: eLife journal article supplement (doi:10.7554/elife.70700), 2023-01-19
Supplement: data3 [file Figure 4C.xls]

## Sheet: Fig 4c
First assay
Concentrations (nM)		10000	2000	400	80	16	3.2	0.64	0.128	DMSO	Background (R1881 10000nM)	blank	blank
Average counting under compound treatment	R1881	475	538	454	620	764	1428	2944	6073	6844	445	18	15
	ENZa	533	1060	2065	3894	6953	8655	8568	8076	7603	439
	Z15	806	596	1413	3636	5591	7747	7808	7956	7603	439
Second assay
Concentrations (nM)		10000	2000	400	80	16	3.2	0.64	0.128	DMSO	Background (R1881 10000nM)	blank	blank
Average counting under compound treatment	R1881	508	460	415	550	809	1503	2965	6193	7922	418	24	21
	ENZa	574	956	2012	4089	6910	8643	7962	7979	7922	418
	Z15	854	676	1304	3420	5331	7703	7776	7586	7922	418
Third assay (not involved in IC50 calculation)
Concentrations (nM)		10000	2000	400	80	16	3.2	0.64	0.128	DMSO	Background (R1881 10000nM)	blank	blank
Average counting under compound treatment	ENZa	428	705	1709	3223	3670	4282	4574	4685	4292	283	20	18
	Z15	499	359	801	2609	3984	3466	4373	4271	4292	283
