# Supplementary material for: Selective androgen receptor degrader (SARD) to overcome antiandrogen resistance in castration-resistant prostate cancer
Source: eLife journal article supplement (doi:10.7554/elife.70700), 2023-01-19
Supplement: data3 [file Figure 5A-mRNA level.xls]

## Sheet: qRT-PCR results
LNCaP cells	ct value
	GAPDH				AR
DMSO	15.96	15.94	15.94		20.24	20.35	20.11
ENZa 5μM	15.77	15.79	15.8		20.2	20.23	20.19
Z15 5μM	16.45	16.47	16.38		20.76	20.68	20.79
Z15 1μM	15.94	15.91	16.03		20.32	20.29	20.38
Z15 0.2μM	15.76	15.69	15.81		20.22	20.39	20.41
