# Supplementary material for: Selective androgen receptor degrader (SARD) to overcome antiandrogen resistance in castration-resistant prostate cancer
Source: eLife journal article supplement (doi:10.7554/elife.70700), 2023-01-19
Supplement: data3 [file Figure 5C.xls]

## Sheet: qRT-PCR results
VCaP cells	ct value
	GAPDH				AR
DMSO	13.11	13.08	13.14		19.07	19.22	19.17
ENZa 5μM	12.95	13.05	13.18		19.17	19.07	19.17
Z15 5μM	14.34	14.24	14.26		20.09	20.25	20.26
Z15 1μM	13.26	13.3	13.24		19.11	19.17	19.14
Z15 0.2μM	13.36	13.17	13.1		19.06	19.2	19.42
