# Supplementary material for: Selective androgen receptor degrader (SARD) to overcome antiandrogen resistance in castration-resistant prostate cancer
Source: eLife journal article supplement (doi:10.7554/elife.70700), 2023-01-19
Supplement: data3 [file Figure 6A.xlsx]

## Sheet: VCaP
VCaP
		OD Value
	Concentration (uM)	Z15			ARV-110			DMSO
	50	0.113	0.114	0.106	0.114	0.125	0.108
	12.5	0.111	0.111	0.118	0.116	0.105	0.124
	3.125	0.253	0.323	0.314	0.222	0.211	0.163
	0.78125	0.56	0.483	0.466	0.417	0.407	0.409	0.757
	0.195312	0.626	0.631	0.612	0.624	0.674	0.588	0.758
	0.0488281	0.775	0.729	0.666	0.769	0.849	0.722	0.798

## Sheet: 22Rv1
22Rv1 cells		OD Value
	Concentration (uM)	ARV-110			Z15			DMSO
	50	0.268	0.311	0.218	0.279	0.366	0.178	1.939
	12.5	1.148	1.06	0.819	0.538	0.583	0.433	1.684
	3.125	1.772	1.675	1.575	1.113	1.112	0.812	1.708
	0.78125	1.661	1.708	1.608	1.28	1.397	1.197
	0.195312	1.696	1.635	1.747	1.504	1.595	1.661
	0.0488281	1.614	1.89	1.752	1.594	1.922	2.009

## Sheet: DU145
DU145 cells
		OD Value
	Concentration (uM)	Z15			ARV-110			DMSO
	50	0.312	0.236	0.251	0.344	0.382	0.365	0.918
	12.5	0.684	0.689	0.619	0.778	0.705	0.749	0.965
	3.125	0.918	0.914	0.941	0.932	1.042	0.671	0.992
	0.78125	0.947	0.944	0.942	0.934	0.937	0.921
	0.195312	0.832	1.008	0.994	0.843	0.874	1.022
	0.0488281	0.922	0.961	0.955	0.925	0.928	0.998

## Sheet: PC-3
PC-3 cells
		OD Value
	Concentration (uM)	Z15			ARV-110			DMSO
	50	1.013	1.013	0.908	1.124	0.974	1.119	1.635
	12.5	1.437	1.616	1.577	1.654	1.651	1.513	1.488
	3.125	1.594	1.663	1.62	1.567	1.711	1.559	1.694
	0.78125	1.673	1.635	1.66	1.628	1.653	1.603	1.658
	0.195312	1.684	1.488	1.607	1.591	1.621	1.596	1.652
	0.0488281	1.688	1.662	1.682	1.672	1.677	1.682	1.668
