# Supplementary material for: Selective androgen receptor degrader (SARD) to overcome antiandrogen resistance in castration-resistant prostate cancer
Source: eLife journal article supplement (doi:10.7554/elife.70700), 2023-01-19
Supplement: data3 [file Figure 6C-Area.xls]

## Sheet: Sheet1
			DMSO	96.9275	95.2546	107.818
			Z15 5 uM	18.6325	27.913	21.7188
