# Supplementary material for: Selective androgen receptor degrader (SARD) to overcome antiandrogen resistance in castration-resistant prostate cancer
Source: eLife journal article supplement (doi:10.7554/elife.70700), 2023-01-19
Supplement: data3 [file Figure 7A-C.xlsx]

## Sheet: Figure 7A
Tumor volume of 22Rv1 xnograft		1				2				3				4				5				6				7				8				9				10				11
		width (mm)	length (mm)	volume (mm3)		width (mm)	length (mm)	volume (mm3)		width (mm)	length (mm)	volume (mm3)		width (mm)	length (mm)	volume (mm3)		width (mm)	length (mm)	volume (mm3)		width (mm)	length (mm)	volume (mm3)		width (mm)	length (mm)	volume (mm3)		width (mm)	length (mm)	volume (mm3)		width (mm)	length (mm)	volume (mm3)		width (mm)	length (mm)	volume (mm3)		width (mm)	length (mm)	volume (mm3)
		Day 1				Day 3				Day 5				Day 7				Day 9				Day 11				Day13				Day 15				Day 17				Day 19				Day 21
Control-1		4.3	5.3	51.3111		4.7	5.6	64.7713		5.6	6.3	103.446		7.2	8.9	241.576		8.1	11.3	388.192		8.3	11.6	418.42		8.8	12.6	510.898		11.6	12.1	852.511		12.8	12.9	1106.64		10.5	15.3	883.219		11.2	16.1	1057.45
Control-2		5.2	5.2	73.6222		5.6	5.8	95.2363		6.1	6.9	134.433		7.6	8.3	251.017		8.4	9.2	339.895		9.7	10.6	522.213		10.8	11.5	702.334		9.1	13.9	602.693		9.7	14.3	704.495		12.1	13.9	1065.58		12.9	14.8	1289.55
Control-3		4.9	5.1	64.1152		5.2	5.6	79.2854		5.8	6.7	118.013		6.9	9.4	234.328		9.1	9.6	416.248		9.9	10.4	533.706		10.3	11.7	649.919		11.2	12.4	814.435		11.6	13.1	922.966		13.3	13.6	1259.62		13.8	14.1	1405.97
Z15 10 mg/kg -1		4.6	4.9	54.2888		4.8	5.2	62.7313		5.2	5.6	79.2854		5.5	6.4	101.369		6.2	7.1	142.903		7.7	8.7	270.084		8.1	9.2	316.05		8.5	9.7	366.951		8.8	10.1	409.53		8.9	10.3	427.185		9.1	10.2	442.264
Z15 10 mg/kg -2		5.1	5.3	72.1797		5.3	5.6	82.3642		5.7	6.1	103.772		6.1	6.4	124.692		6.7	7.9	185.684		7.9	9.1	297.368		8.5	9.3	351.819		9.2	10.5	465.333		9.6	11.1	535.629		10.2	11.2	610.122		10.2	11.3	615.57
Z15 10 mg/kg -3		4.8	4.9	59.1122		4.9	5.3	66.6295		5.6	5.6	91.9523		5.9	6.7	122.117		6.9	8.2	204.414		7.4	7.6	217.909		7.9	8.3	271.226		8.4	8.8	325.117		8.8	9	364.927		9	9.1	385.945		8.9	9.1	377.416
Z15 20 mg/kg -1		4.9	5.3	66.6295		5.4	5.5	83.9748		5.3	5.7	83.835		5.5	6.2	98.2009		5.9	6.7	122.117		6.3	6.9	143.393		6.8	7.5	181.584		7.2	7.9	214.433		7.5	8.2	241.51		7.3	8.3	231.591		7.2	8.3	225.29
Z15 20 mg/kg -2		5	5.2	68.0678		5.1	5.4	73.5415		5.3	5.7	83.835		5.2	5.9	83.5329		5.5	6.2	98.2009		6.1	6.4	124.692		6.6	6.9	157.375		6.9	7.3	181.978		7	7.5	192.423		7.1	7.3	192.681		6.9	7.2	179.485
Z15 20 mg/kg -3		4.8	5.3	63.9377		5.2	5.7	80.7012		5.7	6.1	103.772		5.8	6.1	107.445		6.1	6.2	120.795		6.2	6.3	126.801		6.3	7.8	162.097		6.8	8.2	198.532		7.1	8.6	226.994		7.1	8.6	226.994		7.1	8.7	229.633

## Sheet: Figure 7B
mouse weight		1		2		3		4		5		6		7		8
		mouse weight（g）		mouse weight（g）		mouse weight（g）		mouse weight（g）		mouse weight（g）		mouse weight（g）		mouse weight（g）		mouse weight（g）
		Day 1		Day 4		Day 7		Day 10		Day 13		Day 16		Day 19		Day 21
Control-1		14.55		15.32		16.22		17.25		18.33		19.03		19.65		21.65
Control-2		14.69		15.69		16.34		17.63		17.69		18.94		19.87		20.35
Control-3		14.63		15.89		16.87		17.56		18.29		19.36		20.33		20.89
Z15 10 mg/kg -1		14.96		15.36		16.68		17.53		18.35		19.64		19.23		20.32
Z15 10 mg/kg -2		15.33		15.89		16.05		17.22		17.89		18.88		19.93		20.16
Z15 10 mg/kg -3		15.26		16.21		17.22		18.09		18.52		19.31		19.21		19.87
Z15 20 mg/kg -1		14.55		15.36		15.63		16.05		17.51		17.32		18.03		18.31
Z15 20 mg/kg -2		14.96		15.23		15.74		16.89		17.26		17.89		18.65		18.93
Z15 20 mg/kg -3		15.13		16.06		16.23		16.36		17.95		18.06		18.99		19.26

## Sheet: Figure 7C
Tumor weight in the day 21
		tumor weight (g)
Control-1		1.45158
Control-2		1.41281
Control-3		1.37179
Z15 10 mg/kg -1		0.473382
Z15 10 mg/kg -2		0.651219
Z15 10 mg/kg -3		0.368504
Z15 20 mg/kg -1		0.248004
Z15 20 mg/kg -2		0.178848
Z15 20 mg/kg -3		0.268699
