# Supplementary material for: Selective androgen receptor degrader (SARD) to overcome antiandrogen resistance in castration-resistant prostate cancer
Source: eLife journal article supplement (doi:10.7554/elife.70700), 2023-01-19
Supplement: data3 [file Figure 8A-B.xls]

## Sheet: Z15
Cell lines	LNCaP
Plasmids	PSA 100 ng	Renilla 3 ng
Z15 treatment
Firefly (PSA-luc)
66682	1332048	114387	2278	36008	100421	1026533		77765	1590129	113337	1140594	1762403	655687	1689760
110370	1548427	130162	4761	98472	216346	1322301		70684	2069672	113211	1382593	642690	470282	1553191
80284	1880313	79552	5079	101162	772657	1802373		75093	1811892	152815	1636173	878020	496443	2149291
Renilla
23905352	32236190	33750872	2581200	11918984	7778260	38767752		26736408	36769284	33418310	40222780	41243420	16379340	43289164
26454938	36355376	34469888	2448681	24774614	20681280	45005120		30129852	50621180	35911336	47028532	20457616	15769138	39277144
24910532	41674712	33838024	4015760	31256668	32213778	44702172		29915132	45592668	33203784	49016508	33672864	18436646	48072232
Firefly/Renilla
0.00278942	0.0413215	0.00338916	0.000882535	0.00302106	0.0129105	0.026479		0.00290858	0.0432461	0.00339146	0.0283569	0.0427317	0.0400313	0.0390342
0.004172	0.0425914	0.00377611	0.00194431	0.00397471	0.010461	0.0293811		0.00234598	0.0408855	0.00315251	0.029399	0.0314157	0.0298229	0.0395444
0.00322289	0.0451188	0.00235096	0.00126477	0.00323649	0.0239853	0.0403196		0.0025102	0.0397409	0.00460234	0.03338	0.026075	0.026927	0.0447096
DMSO	DHT 5 nM	ENZa 5 μM	Z15 10 μM	Z15 2.5 μM	Z15 0.625 μM	Z15 0.156 μM		DMSO	DHT 5 nM	ENZa 5 μM	Z15 0.04 μM	Z15 0.01 μM	Z15 0.0025 μM	Z15 0.000625μM
% of DHT group
6.48551	96.0742	7.87993	2.05193	7.02409	30.0174	61.5649		7.04427	104.738	8.21377	68.6774	103.492	96.9517	94.5368
9.70007	99.0268	8.7796	4.5206	9.24137	24.3222	68.3123		5.68171	99.0203	7.63506	71.2013	76.0855	72.228	95.7723
7.49336	104.903	5.46609	2.94063	7.52498	55.7668	93.7447		6.07944	96.2482	11.1464	80.8429	63.1509	65.2143	108.282
DMSO	DHT 5 nM	ENZa 5 μM	Z15 10 μM	Z15 2.5 μM	Z15 0.625 μM	Z15 0.156 μM		DMSO	DHT 5 nM	ENZa 5 μM	Z15 0.04 μM	Z15 0.01 μM	Z15 0.0025 μM	Z15 0.000625μM

## Sheet: ZL-2
Cell lines	LNCaP
Plasmids	PSA 100 ng	Renilla 3 ng
ZL-2 treatment
Firefly (PSA-luc)
28432	777041	65711	10873	19535	74135	205006		48757	818778	47432	167859	154594	133015	384241
22859	782074	59108	13536	25915	85525	210010		32333	522983	24059	115851	133593	195741	293292
37413	681925	78167	25823	37948	78134	172271		49243	673786	31764	240674	192100	192382	275097
Renilla
2811978	4778533	3058219	1555806	1450372	1124319	2935069		4359428	4826310	2603771	2193664	1611246	1536617	2756910
3167360	5350614	4463603	1526972	1236445	1198160	3163429		3634979	4396873	2700766	2238755	1495678	1949154	2232127
3542933	4949007	3931637	2573625	2273457	1675884	2280949		3169092	5512952	3680322	3236534	2119431	2183271	2006048
Firefly/Renilla
0.010111	0.162611	0.0214867	0.00698866	0.013469	0.0659377	0.0698471		0.0111843	0.169649	0.0182167	0.0765199	0.0959469	0.0865635	0.139374
0.00721705	0.146165	0.0132422	0.0088646	0.0209593	0.0713803	0.0663868		0.00889496	0.118944	0.00890821	0.051748	0.0893194	0.100424	0.131396
0.0105599	0.13779	0.0198815	0.0100337	0.0166918	0.0466226	0.075526		0.0155385	0.122219	0.00863077	0.0743616	0.0906375	0.0881164	0.137134
DMSO	DHT 5 nM	ENZa 5 μM	ZL-2 10 μM	ZL-2 2.5 μM	ZL-2 0.625 μM	ZL-2 0.156 μM		DMSO	DHT 5 nM	ENZa 5 μM	ZL-2 0.04 μM	ZL-2 0.01 μM	ZL-2 0.0025 μM	ZL-2 0.000625μM
% of DHT group
6.79048	109.208	14.4303	4.69353	9.04564	44.2832	46.9087		8.16966	123.922	13.3065	55.8948	70.0854	63.2312	101.807
4.84691	98.1634	8.89336	5.95339	14.0761	47.9384	44.5848		6.49742	86.8841	6.5071	37.7998	65.2442	73.3554	95.9794
7.09194	92.5388	13.3523	6.73855	11.21	31.3113	50.7226		11.3503	89.2759	6.30443	54.3182	66.2071	64.3655	100.171
DMSO	DHT 5 nM	ENZa 5 μM	ZL-2 10 μM	ZL-2 2.5 μM	ZL-2 0.625 μM	ZL-2 0.156 μM		DMSO	DHT 5 nM	ENZa 5 μM	ZL-2 0.04 μM	ZL-2 0.01 μM	ZL-2 0.0025 μM	ZL-2 0.000625μM

## Sheet: ZL-3
Cell lines	LNCaP
Plasmids	PSA 100 ng	Renilla 3 ng
ZL-3 treatment
Firefly (PSA-luc)
41101	393342	51701	7190	9205	26789	76540		41285	404003	31392	280777	186630	148873	233278
58635	416184	51446	8603	14911	16893	145258		37467	416277	38508	235434	274380	147215	222037
46980	447993	49694	17854	21504	56360	187672		51689	422758	25777	303330	483427	323514	238412
Renilla
4954933	10829993	5040600	1951968	1715740	1572229	2564038		6985402	13154945	4720287	8284697	5552488	4251431	6561061
4593635	9917923	4418377	1571920	1324340	1326029	4161060		5370999	12768028	5014185	7345277	8414437	3894146	6504169
3659905	10435723	4039691	2865781	3042103	3540650	5193488		6350722	13960981	4472073	9244756	15016550	8391961	6816649
Firefly/Renilla
0.00829497	0.0363197	0.0102569	0.00368346	0.00536503	0.0170389	0.0298514		0.00591018	0.0307111	0.00665044	0.033891	0.033612	0.0350172	0.0355549
0.0127644	0.0419628	0.0116436	0.00547292	0.0112592	0.0127395	0.0349089		0.0069758	0.0326031	0.00767981	0.0320524	0.0326082	0.0378042	0.0341376
0.0128364	0.0429288	0.0123014	0.00623006	0.00706879	0.015918	0.036136		0.00813907	0.0302814	0.00576399	0.032811	0.0321929	0.0385505	0.034975
DMSO	DHT 5 nM	ENZa 5 μM	ZL-3 10 μM	ZL-3 2.5 μM	ZL-3 0.625 μM	ZL-3 0.156 μM		DMSO	DHT 5 nM	ENZa 5 μM	ZL-3 0.04 μM	ZL-3 0.01 μM	ZL-3 0.0025 μM	ZL-3 0.000625μM
% of DHT group
20.5321	89.9002	25.3884	9.11748	13.2798	42.1754	73.8895		18.9429	98.4331	21.3155	108.625	107.731	112.234	113.958
31.5951	103.868	28.8209	13.5468	27.8693	31.5335	86.4082		22.3583	104.497	24.6148	102.732	104.514	121.167	109.416
31.7733	106.259	30.4491	15.421	17.497	39.4009	89.4456		26.0868	97.0558	18.4743	105.164	103.183	123.559	112.099
DMSO	DHT 5 nM	ENZa 5 μM	ZL-3 10 μM	ZL-3 2.5 μM	ZL-3 0.625 μM	ZL-3 0.156 μM		DMSO	DHT 5 nM	ENZa 5 μM	ZL-3 0.04 μM	ZL-3 0.01 μM	ZL-3 0.0025 μM	ZL-3 0.000625μM

## Sheet: ZL-4
Cell lines	LNCaP
Plasmids	PSA 100 ng	Renilla 3 ng
ZL-4 treatment
Firefly (PSA-luc)
56749	722467	63244	8695	49882	16462	95075		54758	767933	40846	226195	153108	86223	195977
54587	720953	53236	17344	30840	25246	132212		85734	809771	38329	239535	130840	153255	205743
51760	765434	72035	15885	63783	30125	164920		77607	854681	39604	347349	134326	109370	234735
Renilla
6631399	8334333	6119696	3403627	3215304	1255556	3607084		7264724	14502328	8399747	7053899	4094301	2294277	2924043
7963719	10879099	5481894	2951293	2589069	1679896	4018456		8636543	14775647	6764594	6106041	3433607	3392945	3463767
6985527	12029356	4950159	3790304	5613593	2589849	5934126		9797913	11053485	6274294	7394440	2968926	2443301	3888366
Firefly/Renilla
0.00855762	0.0866856	0.0103345	0.00255463	0.0155139	0.0131113	0.0263579		0.00753752	0.0529524	0.00486277	0.0320667	0.0373954	0.0375818	0.0670226
0.00685446	0.0662696	0.00971124	0.00587675	0.0119116	0.0150283	0.0329012		0.00992689	0.0548044	0.00566612	0.0392292	0.0381057	0.0451687	0.0593986
0.00740961	0.0636305	0.0145521	0.00419096	0.0113622	0.011632	0.0277918		0.00792077	0.0773223	0.0063121	0.0469743	0.045244	0.0447632	0.0603685
DMSO	DHT 5 nM	ENZa 5 μM	ZL-4 10 μM	ZL-4 2.5 μM	ZL-4 0.625 μM	ZL-4 0.156 μM		DMSO	DHT 5 nM	ENZa 5 μM	ZL-4 0.04 μM	ZL-4 0.01 μM	ZL-4 0.0025 μM	ZL-4 0.000625μM
% of DHT group
11.8535	120.072	14.3147	3.53851	21.4889	18.161	36.5093		12.2178	85.8321	7.8822	51.9778	60.6153	60.9174	108.639
9.49437	91.7924	13.4514	8.1401	16.4992	20.8163	45.5727		16.0908	88.8341	9.18438	63.5877	61.7667	73.2153	96.281
10.2633	88.137	20.1566	5.80505	15.7383	16.1119	38.4955		12.839	125.334	10.2315	76.1421	73.3373	72.558	97.8532
DMSO	DHT 5 nM	ENZa 5 μM	ZL-4 10 μM	ZL-4 2.5 μM	ZL-4 0.625 μM	ZL-4 0.156 μM		DMSO	DHT 5 nM	ENZa 5 μM	ZL-4 0.04 μM	ZL-4 0.01 μM	ZL-4 0.0025 μM	ZL-4 0.000625μM

## Sheet: ZL-5
Cell lines	LNCaP
Plasmids	PSA 100 ng	Renilla 3 ng
ZL-5 treatment
Firefly (PSA-luc)
45437	383420	30949	16989	31576	54307	217665		67150	524922	49096	349705	335695	129287	261279
36184	462813	20881	17449	47620	132020	315483		55076	573505	48866	334576	301125	209207	359456
28979	442274	21554	33696	52780	130258	369989		33587	628940	32161	455814	594651	258636	495146
Renilla
2070529	4737231	4073810	2726021	3006926	1360052	3904046		4208312	6538257	5271331	5682741	4872676	2188893	3822948
3307197	5327903	3151833	2958893	3863259	3632571	4427966		6291805	9238113	5278958	5566577	5086465	3067392	5345649
3604945	5945414	2769018	3332871	3728507	3999907	4983770		6335329	10903368	4653695	5707455	8445023	3863788	7448756
Firefly/Renilla
0.0219446	0.0809376	0.00759707	0.00623216	0.0105011	0.0399301	0.0557537		0.0159565	0.0802847	0.00931378	0.0615381	0.0688934	0.059065	0.0683449
0.010941	0.0868659	0.00662503	0.00589714	0.0123264	0.0363434	0.0712478		0.00875361	0.0620803	0.00925675	0.0601044	0.0592012	0.0682035	0.0672427
0.00803868	0.0743891	0.00778399	0.0101102	0.0141558	0.0325653	0.0742388		0.00530154	0.0576831	0.00691085	0.0798629	0.0704144	0.0669385	0.0664737
DMSO	DHT 5 nM	ENZa 5 μM	ZL-5 10 μM	ZL-5 2.5 μM	ZL-5 0.625 μM	ZL-5 0.156 μM		DMSO	DHT 5 nM	ENZa 5 μM	ZL-5 0.04 μM	ZL-5 0.01 μM	ZL-5 0.0025 μM	ZL-5 0.000625μM
% of DHT group
27.1827	100.257	9.41046	7.71976	13.0077	49.4613	69.0619		23.93	120.403	13.9679	92.2887	103.319	88.5798	102.497
13.5526	107.6	8.20641	7.30477	15.2686	45.0185	88.2545		13.1278	93.1019	13.8824	90.1386	88.7841	102.285	100.844
9.95749	92.1455	9.642	12.5235	17.5347	40.3385	91.9593		7.95072	86.5073	10.3642	119.77	105.6	100.388	99.6905
DMSO	DHT 5 nM	ENZa 5 μM	ZL-5 10 μM	ZL-5 2.5 μM	ZL-5 0.625 μM	ZL-5 0.156 μM		DMSO	DHT 5 nM	ENZa 5 μM	ZL-5 0.04 μM	ZL-5 0.01 μM	ZL-5 0.0025 μM	ZL-5 0.000625μM

## Sheet: ZL-6
Cell lines	LNCaP
Plasmids	PSA 100 ng	Renilla 3 ng
ZL-6 treatment
Firefly (PSA-luc)
29552	184042	18536	6851	7491	28235	182464	108153	132497	108948	92845
33374	187580	26726	8348	16182	5886	265737	145813	157603	101095	114295
44170	422653	55524	36564	36920	69559	344695	328129	266595	164432	181939
Renilla
4518133	5803384	3847034	3187108	2371499	1720704	9069908	5299843	4502834	3163009	2585761
4248498	5511128	4992353	3465739	2504063	1422196	11716366	5922198	4813387	4653819	3813658
11295668	12022002	9434980	8706853	12042360	8869628	14999929	9629953	7660509	5044718	4994457
Firefly/Renilla
0.00654075	0.0317129	0.00481826	0.0021496	0.00315876	0.016409	0.0201175	0.0204068	0.0294252	0.0344444	0.0359063
0.00785548	0.0340366	0.00535339	0.00240872	0.0064623	0.00413867	0.0226808	0.0246214	0.0327426	0.021723	0.0299699
0.00391035	0.0351566	0.00588491	0.00419945	0.00306584	0.00784238	0.0229798	0.0340738	0.0348012	0.0325949	0.0364282
DMSO	DHT 5 nM	ENZa 5 μM	ZL-6 10 μM	ZL-6 2.5 μM	ZL-6 0.625 μM	ZL-6 0.156 μM	ZL-6 0.04 μM	ZL-6 0.01 μM	ZL-6 0.0025 μM	ZL-6 0.000625μM
% of DHT group
19.4434	94.2713	14.323	6.39001	9.3899	48.7782	59.8024	60.6624	87.471	102.391	106.737
23.3516	101.179	15.9138	7.16029	19.2102	12.3028	67.4222	73.1909	97.3325	64.575	89.0901
11.6241	104.508	17.4938	12.4835	9.11369	23.3127	68.3109	101.29	103.452	96.8932	108.288
DMSO	DHT 5 nM	ENZa 5 μM	ZL-6 10 μM	ZL-6 2.5 μM	ZL-6 0.625 μM	ZL-6 0.156 μM	ZL-6 0.04 μM	ZL-6 0.01 μM	ZL-6 0.0025 μM	ZL-6 0.000625μM

## Sheet: ZL-7
Cell lines	LNCaP
Plasmids	PSA 100 ng	Renilla 3 ng
ZL-7 treatment
Firefly (PSA-luc)
46115	336558	42615	23356	23381	32943	172710		54047	406608	63093	381713	266679	143239	453053
51137	626797	35732	19656	39056	77908	342678		60647	495809	45153	276940	296574	201267	497325
61918	531023	74490	20074	44551	159692	287980		58284	675396	48084	381294	498651	480393	620582
Renilla
3637860	6467430	4928803	3400464	3471018	2509754	14377382		4791196	8381811	5826858	7730284	6037711	2529751	7414134
5779000	11931167	5770872	4313963	4807181	3606589	10743523		7604991	9513638	6309247	8060254	8048451	4596660	7549401
7636576	9409640	7502154	4752061	7232100	8829801	9275590		6200910	10588505	7468281	8366402	9508485	9431483	10032470
Firefly/Renilla
0.0126764	0.0520389	0.00864612	0.00686847	0.00673606	0.013126	0.0120126		0.0112805	0.0485108	0.010828	0.0493789	0.0441689	0.0566218	0.0611067
0.00884876	0.0525344	0.00619179	0.00455637	0.00812451	0.0216016	0.0318962		0.00797463	0.0521156	0.00715664	0.0343587	0.0368486	0.0437855	0.0658761
0.00810808	0.0564339	0.00992915	0.00422427	0.00616017	0.0180856	0.0310471		0.00939927	0.0637858	0.00643843	0.0455744	0.0524427	0.050935	0.0618573
DMSO	DHT 5 nM	ENZa 5 μM	ZL-7 10 μM	ZL-7 2.5 μM	ZL-7 0.625 μM	ZL-7 0.156 μM		DMSO	DHT 5 nM	ENZa 5 μM	ZL-7 0.04 μM	ZL-7 0.01 μM	ZL-7 0.0025 μM	ZL-7 0.000625μM
% of DHT group
23.6192	96.9609	16.1098	12.7976	12.5509	24.4568	22.3824		20.5848	88.5233	19.7591	90.1075	80.6002	103.324	111.509
16.4874	97.8842	11.5368	8.4896	15.1379	40.2489	59.4303		14.5522	95.1015	13.0596	62.6984	67.2419	79.9005	120.212
15.1073	105.15	18.5004	7.87083	11.4779	33.6977	57.8481		17.1519	116.397	11.749	83.165	95.6984	92.9472	112.878
DMSO	DHT 5 nM	ENZa 5 μM	ZL-7 10 μM	ZL-7 2.5 μM	ZL-7 0.625 μM	ZL-7 0.156 μM		DMSO	DHT 5 nM	ENZa 5 μM	ZL-7 0.04 μM	ZL-7 0.01 μM	ZL-7 0.0025 μM	ZL-7 0.000625μM
