# Supplementary figures and images for: Selective androgen receptor degrader (SARD) to overcome antiandrogen resistance in castration-resistant prostate cancer
Source: eLife journal article supplement (doi:10.7554/elife.70700), 2023-01-19

MaxPeak: 98.38%  
Ret\_Time: 0.926 min

2604918

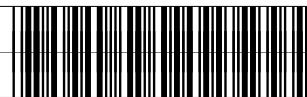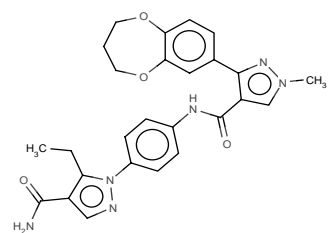

Mol Wt 486.523  
Exact Mass 486.22

| # | Time  | Area% |
|---|-------|-------|
| 1 | 0.926 | 98.38 |
| 2 | 1.004 | 1.62  |

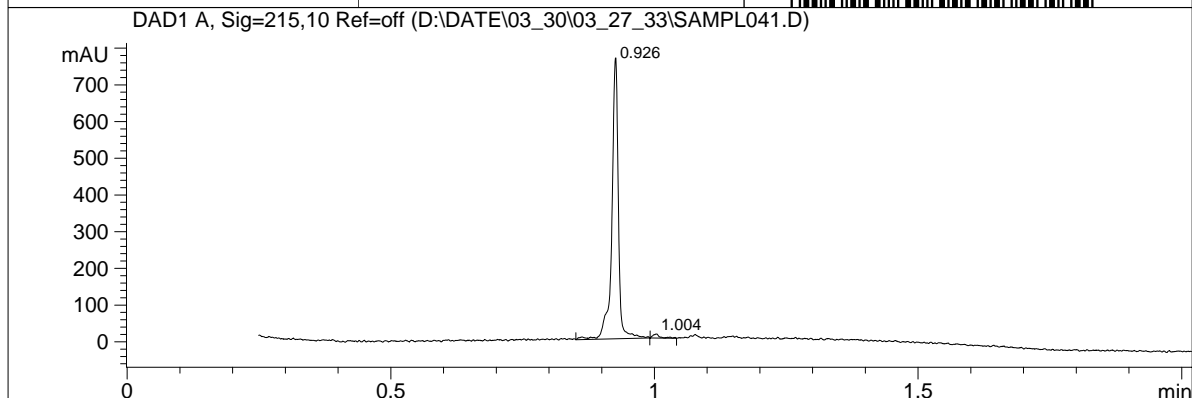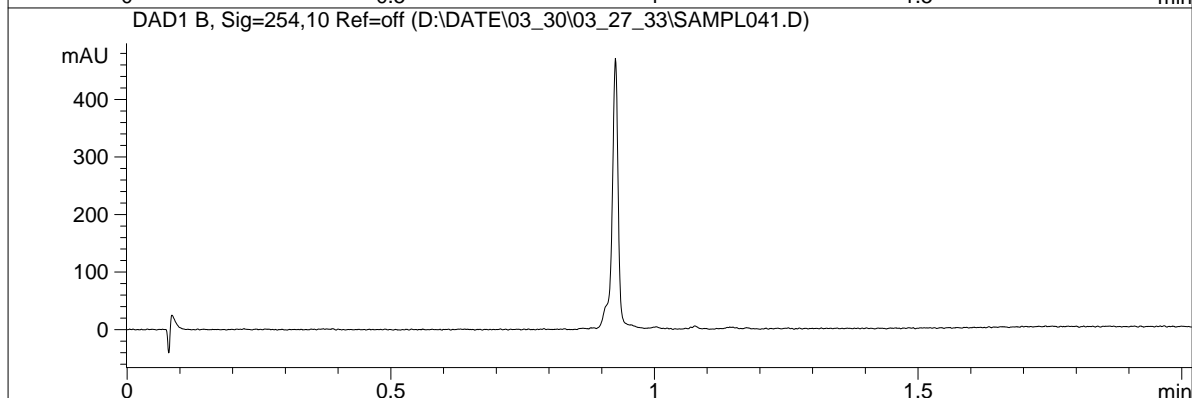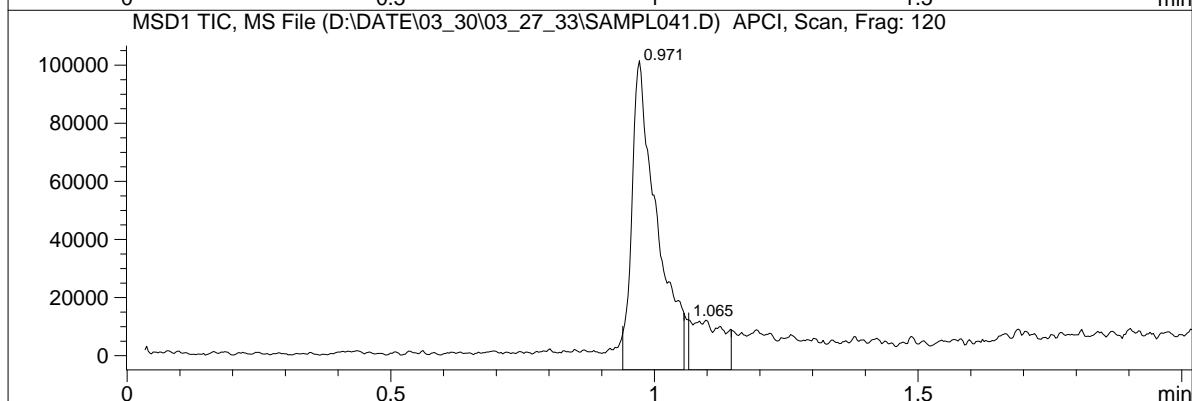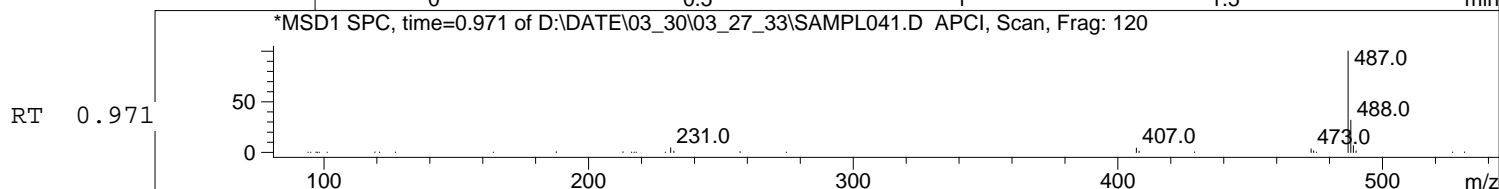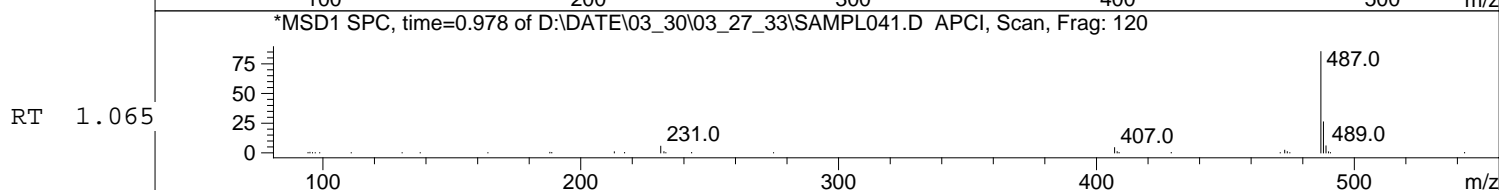

Supplement: data2 [file elife-70700-data2-v2.zip]

MaxPeak: 91.15%  
Ret\_Time: 1.176 min

5355026

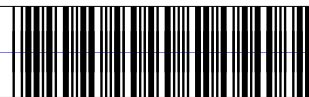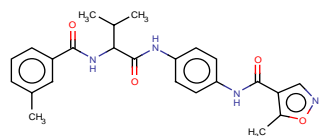

Mol Wt 434.488  
Exact Mass 434.22

| # | Time  | Area% |
|---|-------|-------|
| 1 | 0.742 | 3.83  |
| 2 | 1.039 | 5.02  |
| 3 | 1.176 | 91.15 |

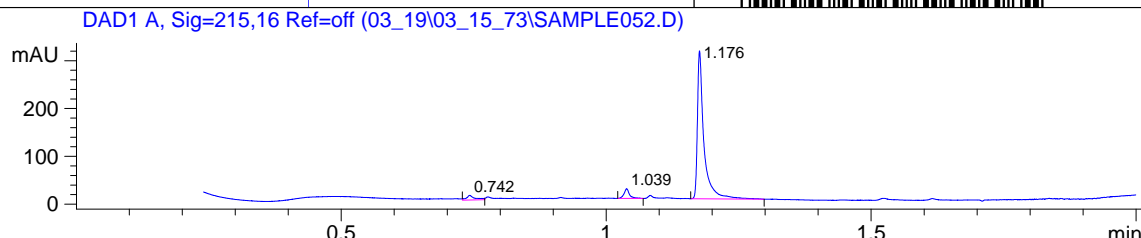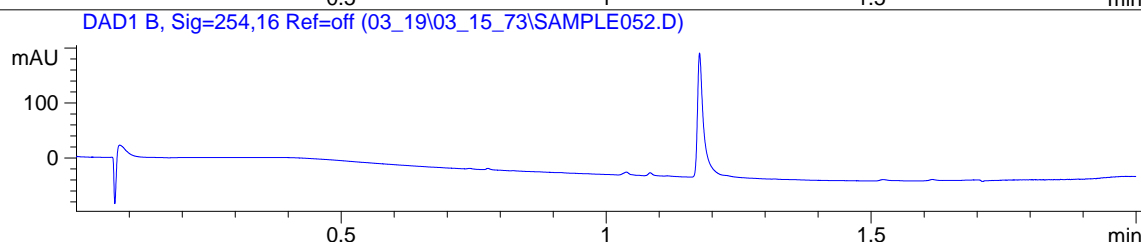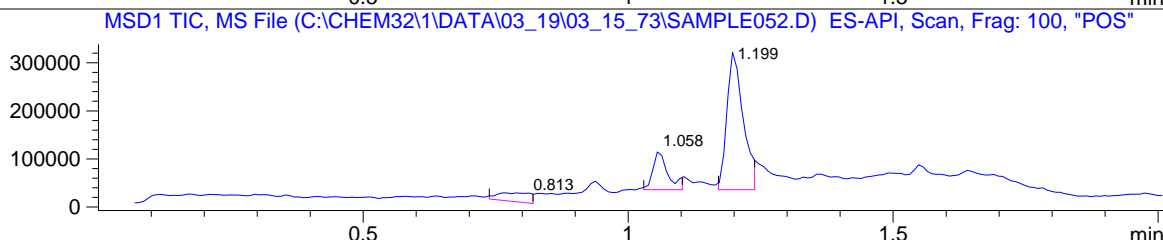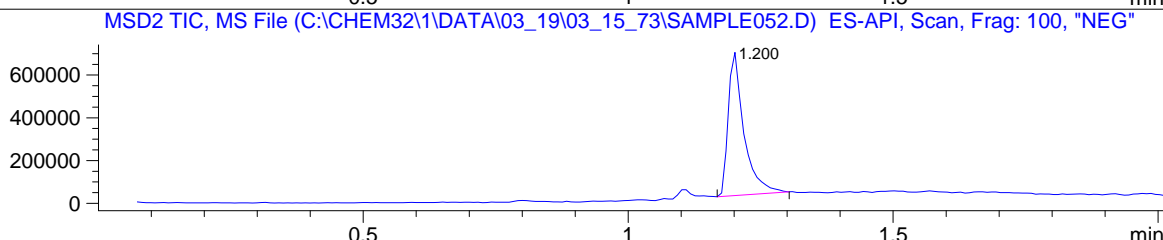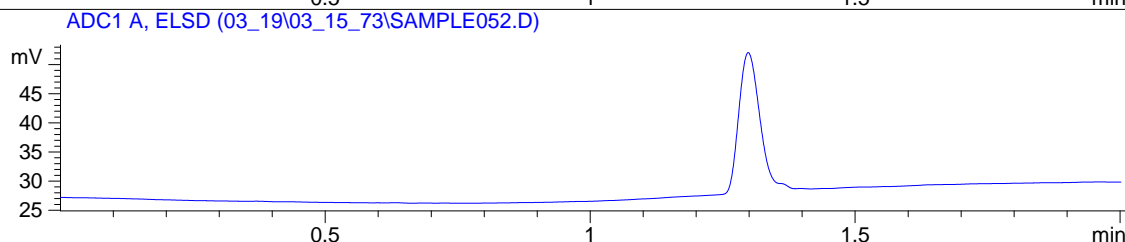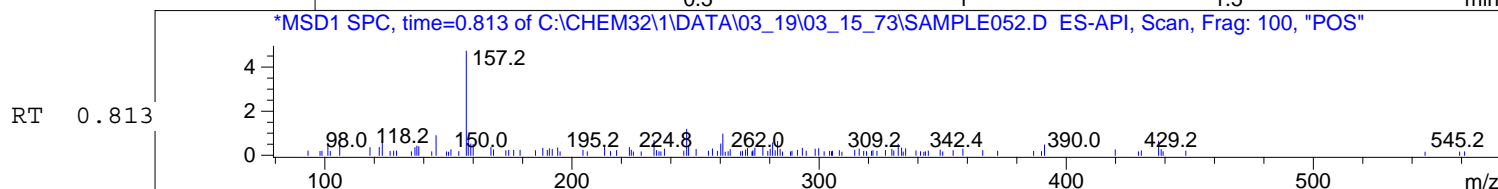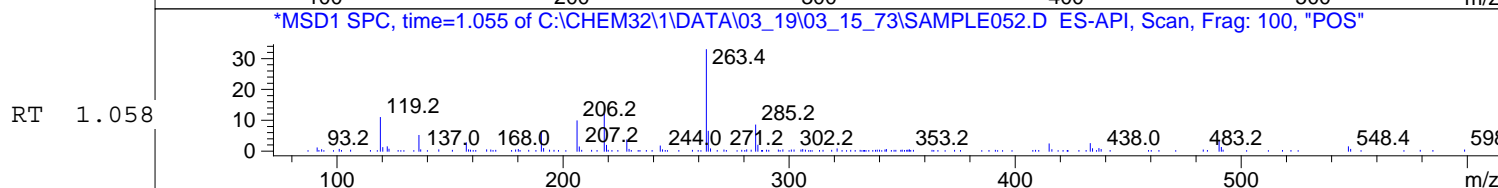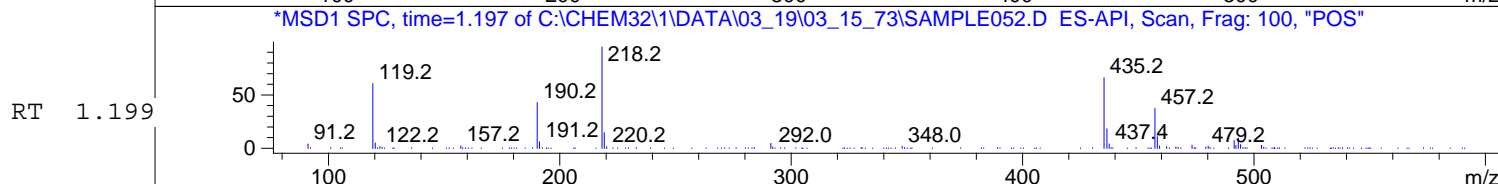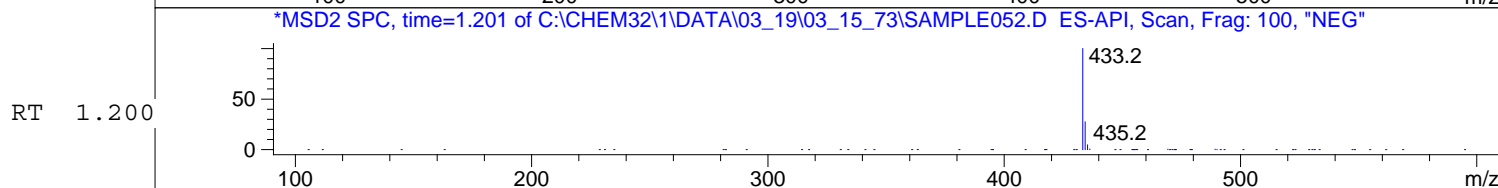

Supplement: data2 [file elife-70700-data2-v2.zip]

MaxPeak: 100.00%  
Ret\_Time: 1.388 min

T6783885

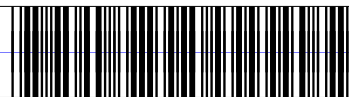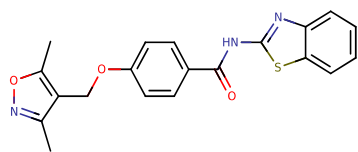

Mol Wt 379.43  
Exact Mass 379.11

| # | Time  | Area%  |
|---|-------|--------|
| 1 | 1.388 | 100.00 |

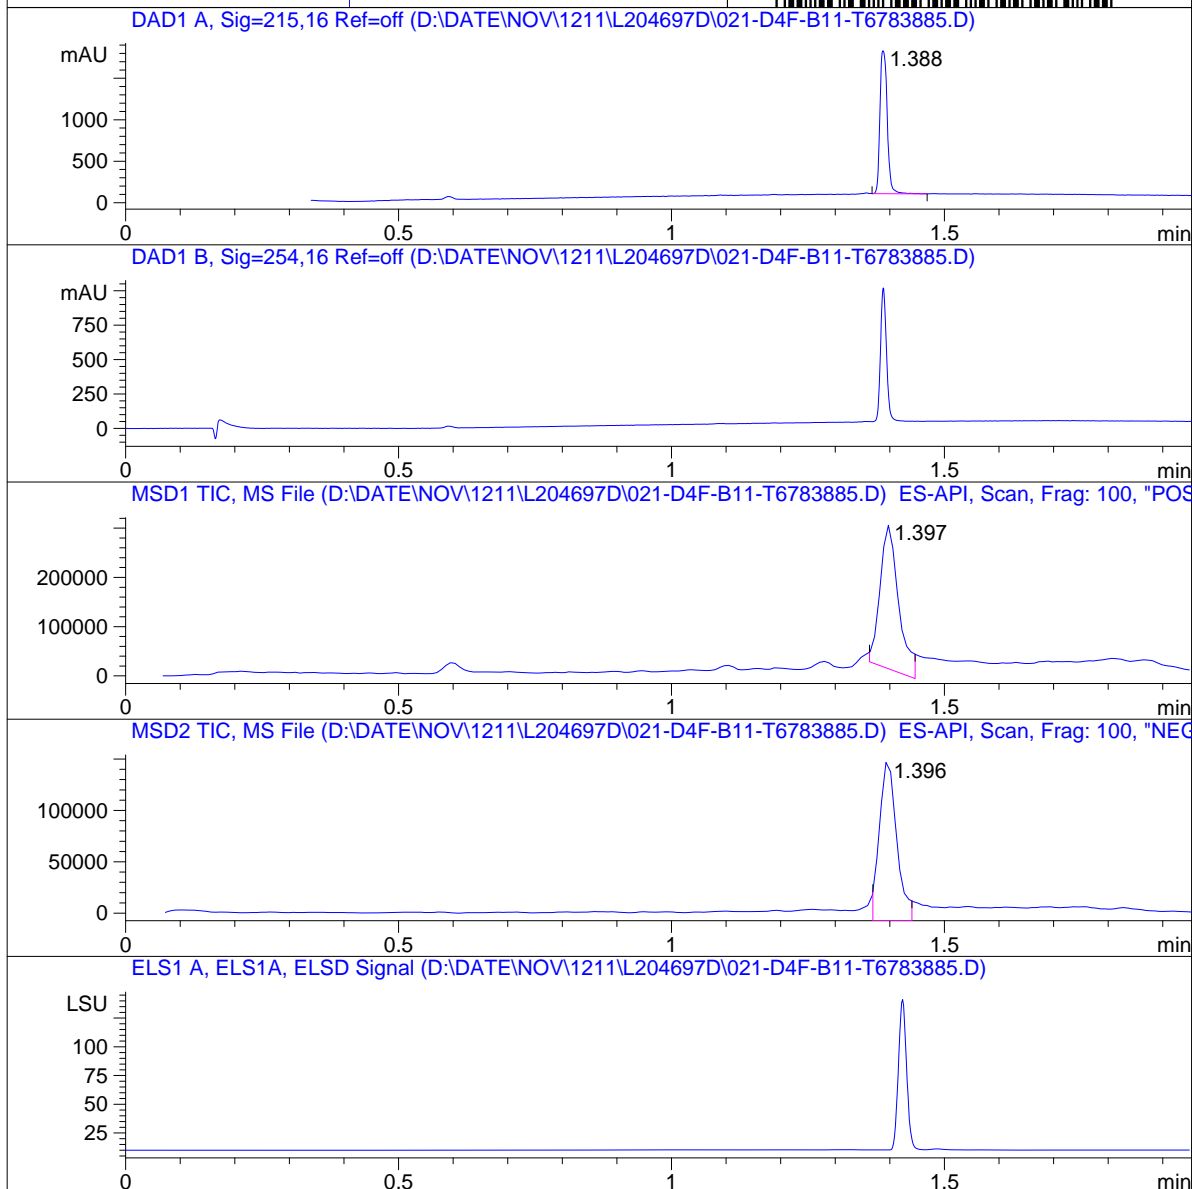

RT 1.397

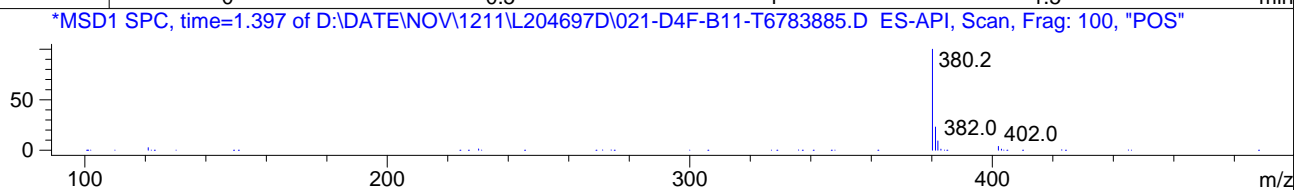

RT 1.396

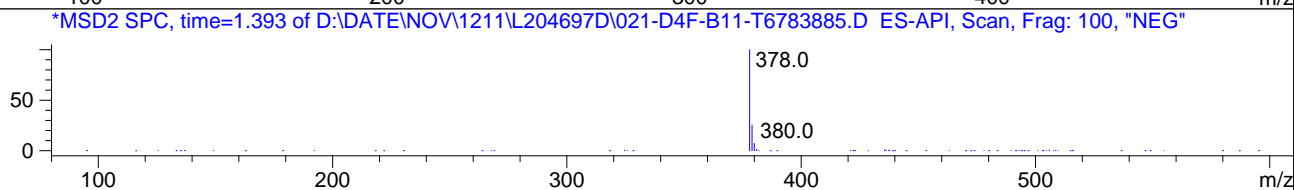

Supplement: data2 [file elife-70700-data2-v2.zip]

MaxPeak: 100.00%  
Ret\_Time: 1.070 min

2665320

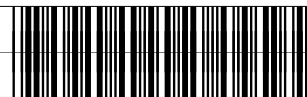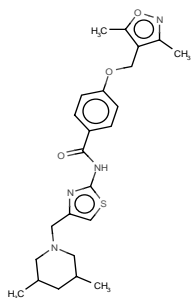

Mol Wt 454.586  
Exact Mass 454.24

| # | Time  | Area%  |
|---|-------|--------|
| 1 | 1.070 | 100.00 |

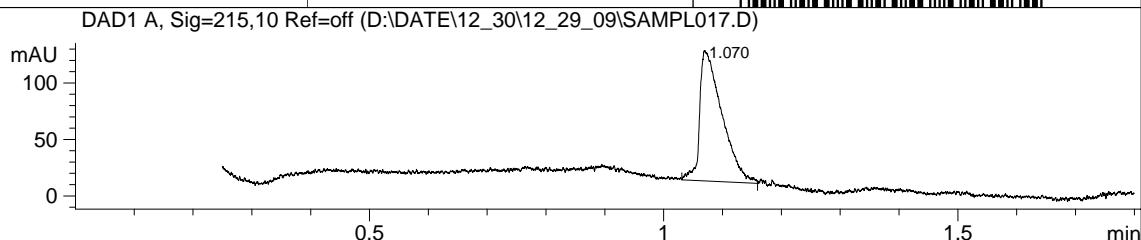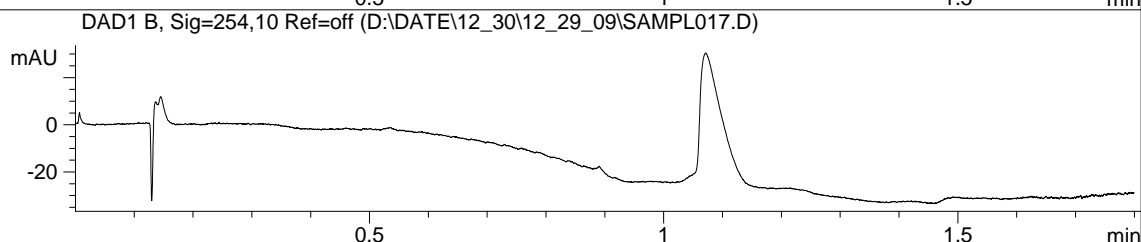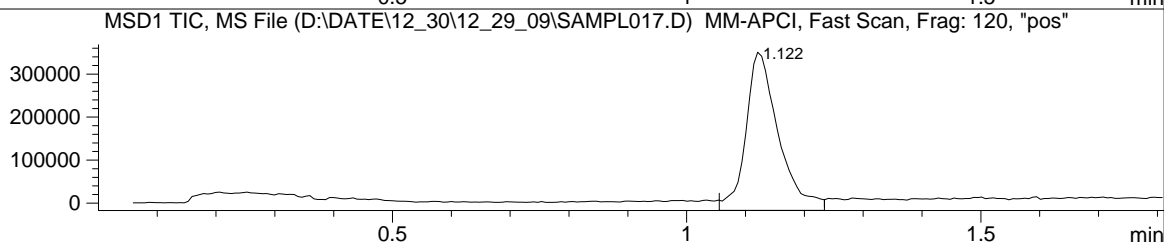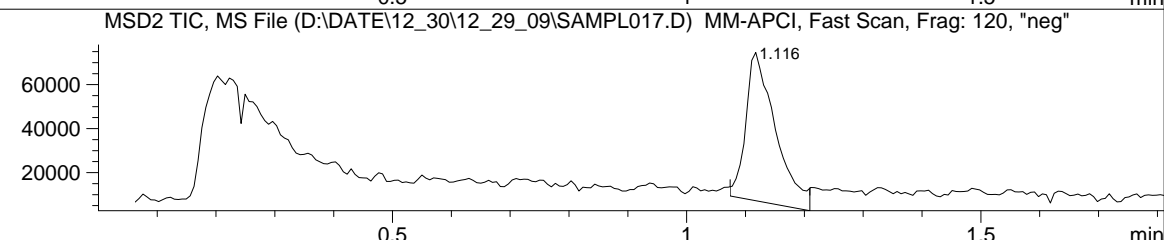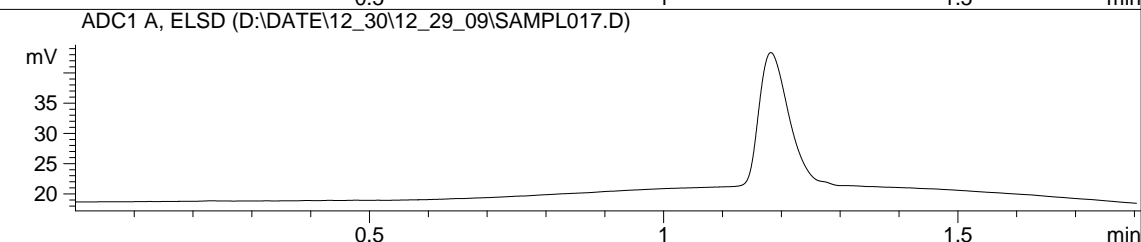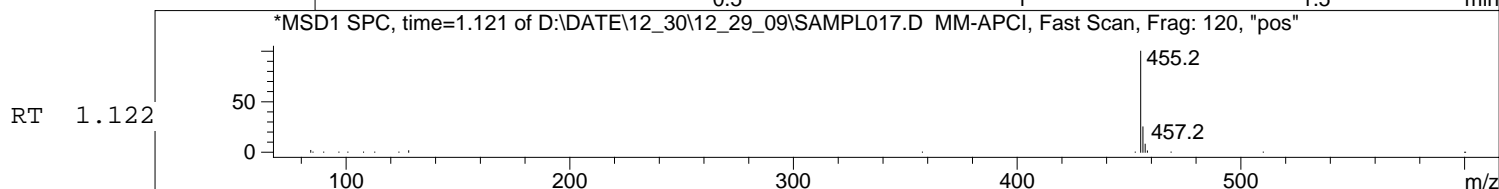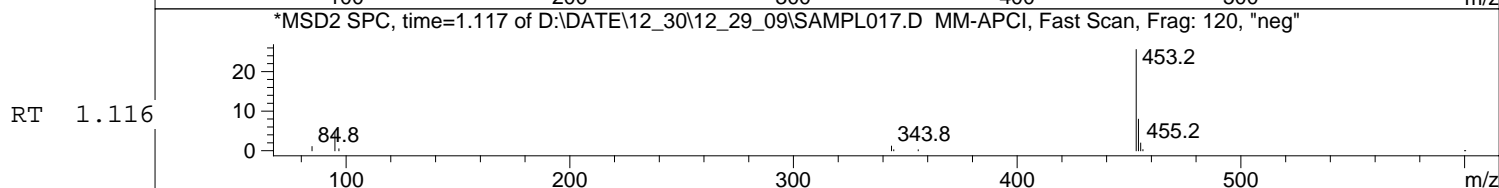

Supplement: data2 [file elife-70700-data2-v2.zip]

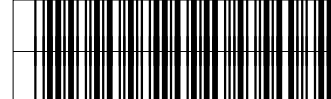

MaxPeak: 100.00%  
Ret\_Time: 0.607 min

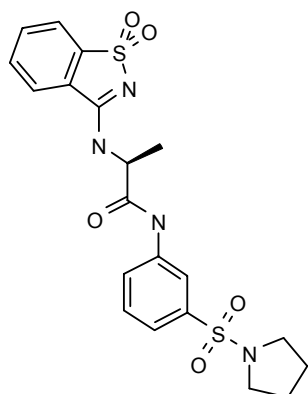

mw = 462,55

| # | Time  | Area%  |
|---|-------|--------|
| 1 | 0.607 | 100.00 |

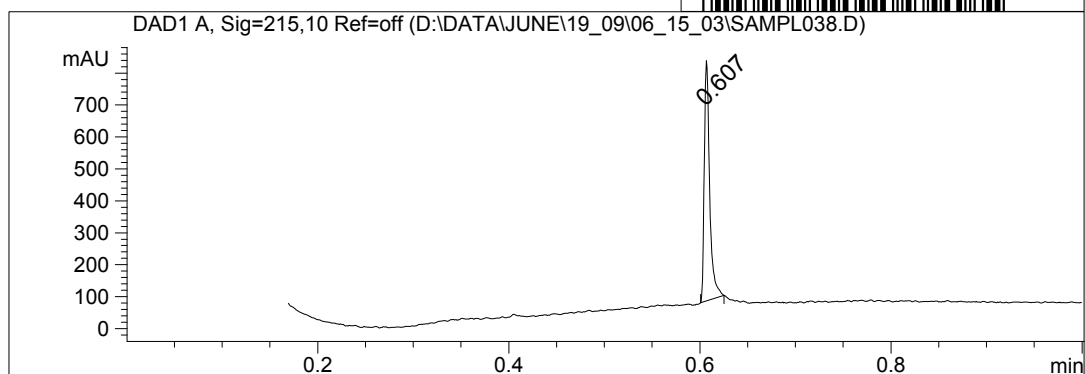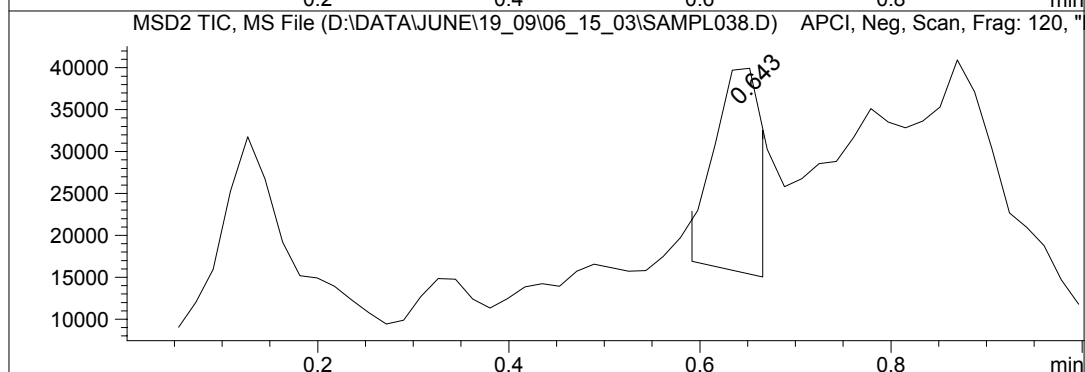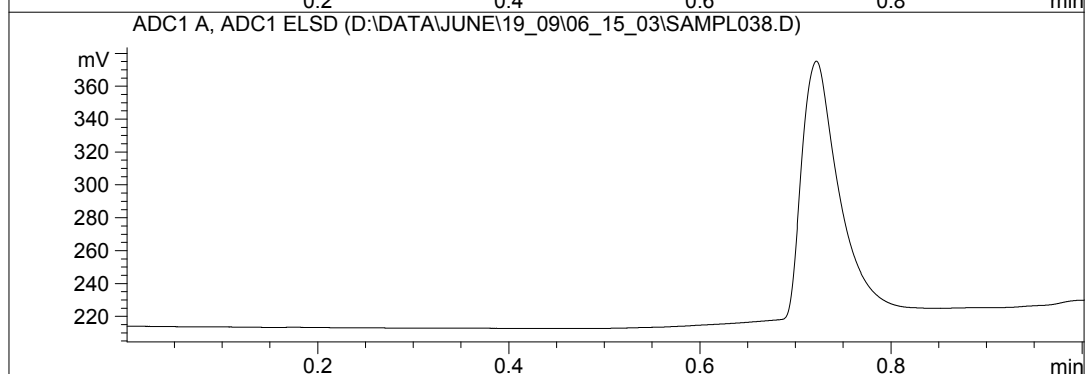

RT 0.643

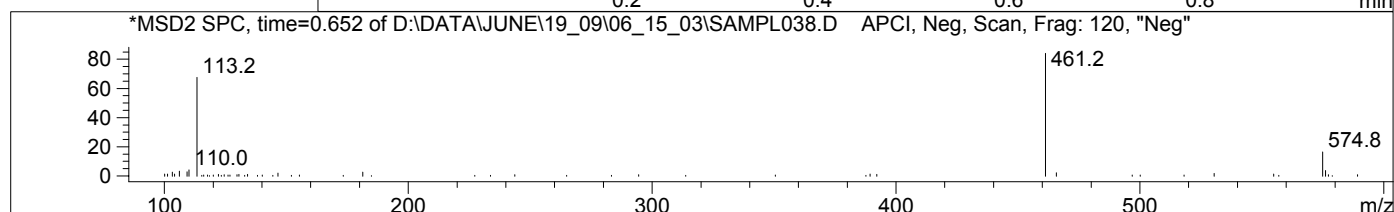

Supplement: data2 [file elife-70700-data2-v2.zip]

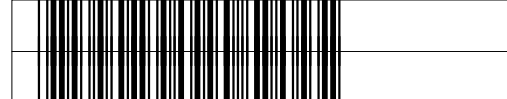

MaxPeak: 100.00%  
Ret\_Time: 0.698 min

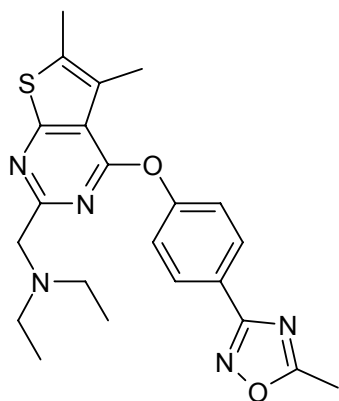

mw = 423,54

| # | Time  | Area%  |
|---|-------|--------|
| 1 | 0.698 | 100.00 |

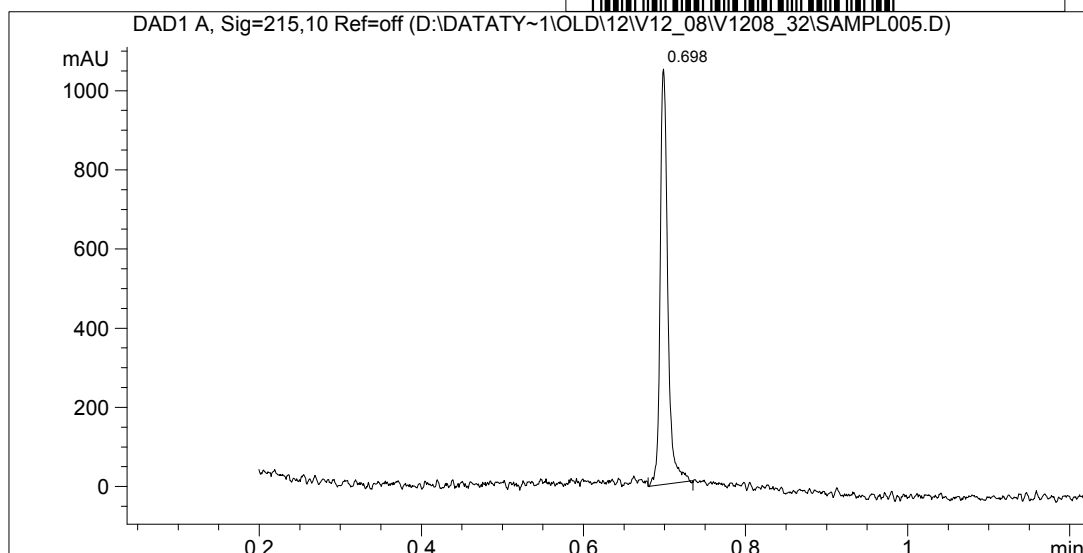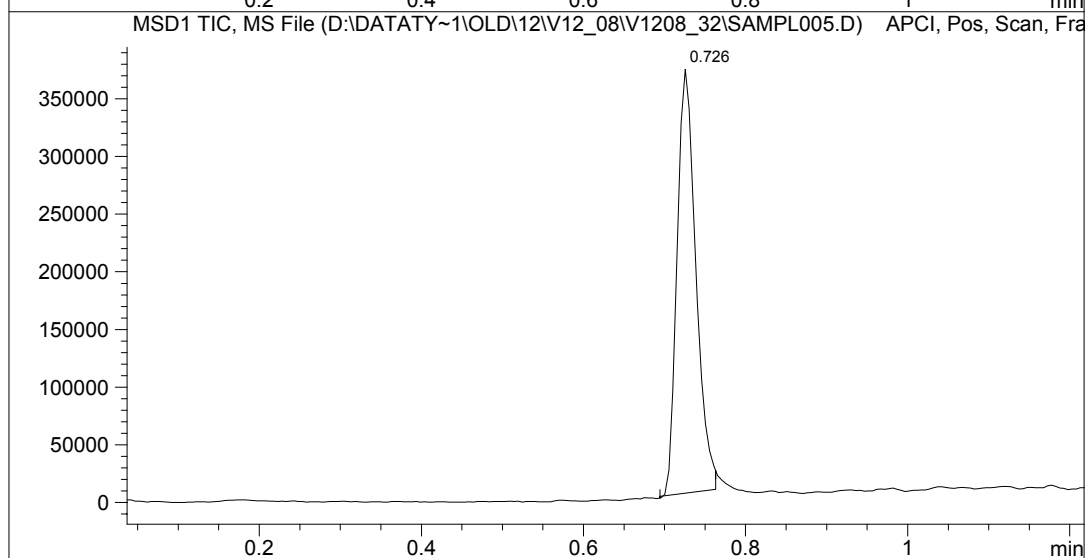

RT 0.726

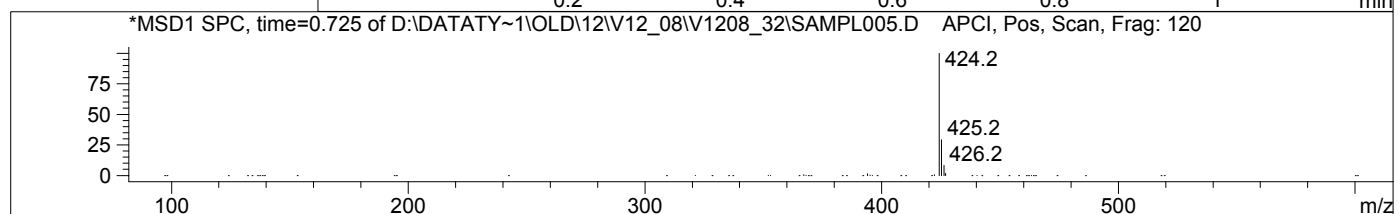

Supplement: data2 [file elife-70700-data2-v2.zip]

MaxPeak: 95.23%  
Ret\_Time: 1.534 min

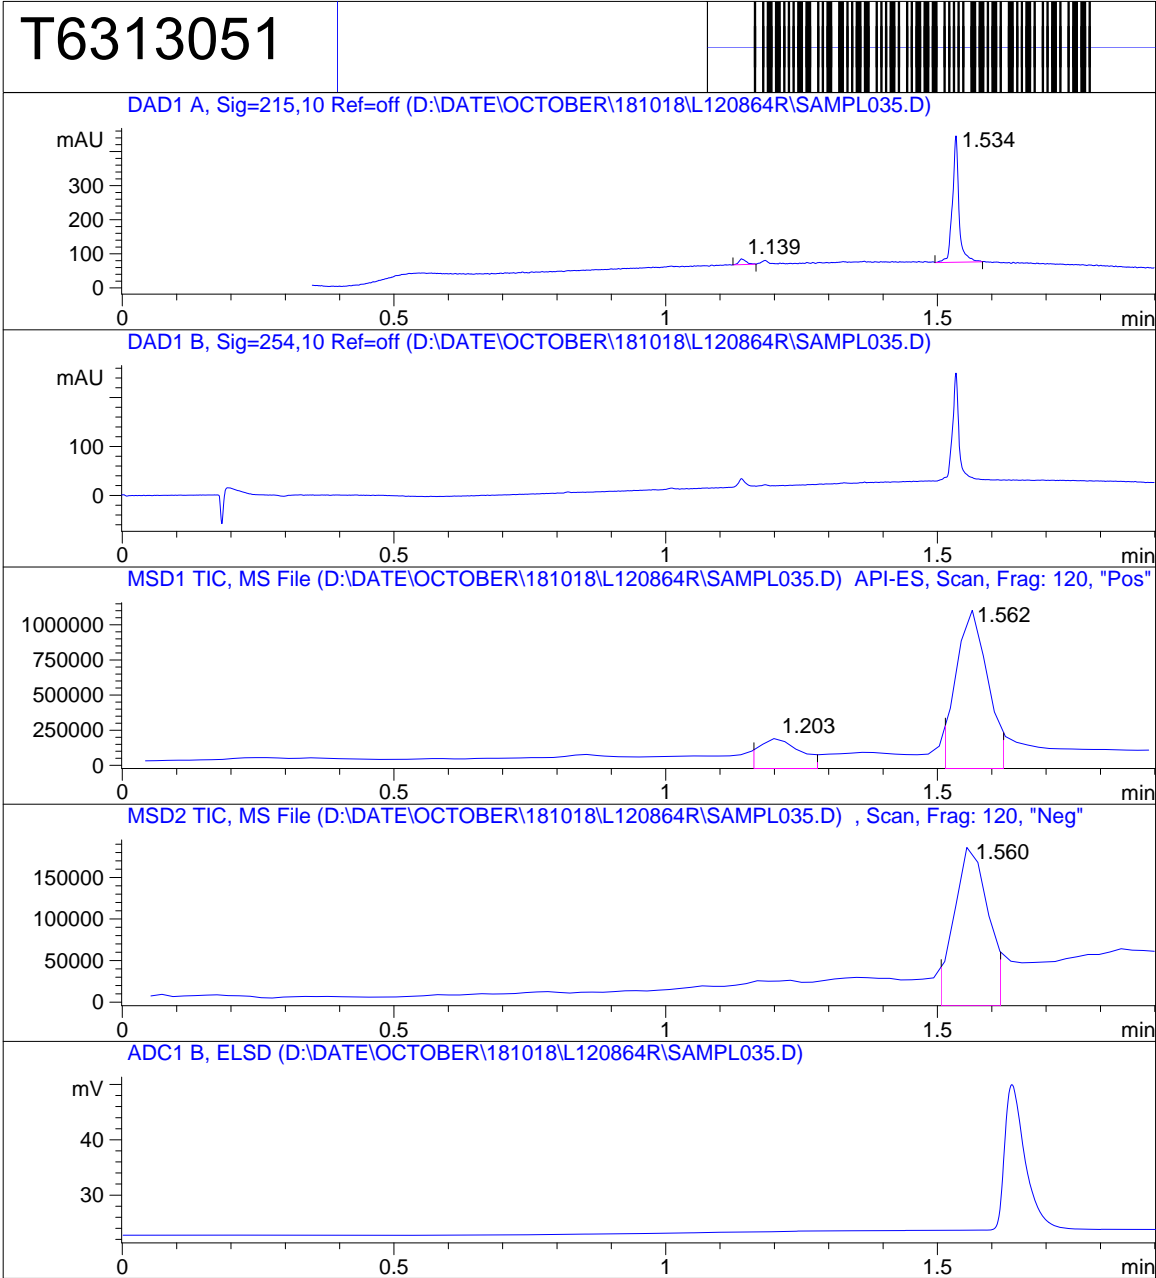

Supplement: data2 [file elife-70700-data2-v2.zip]

Sample Name: 1432396

MaxPeak: 100.00%  
Ret\_Time: 0.760 min

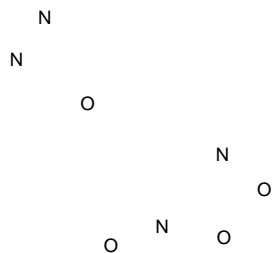

| # | Time  | Area%  |
|---|-------|--------|
| 1 | 0.760 | 100.00 |

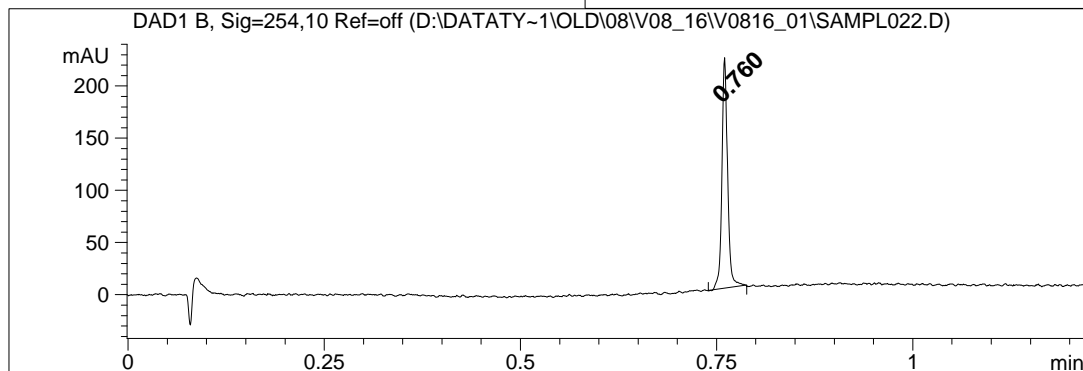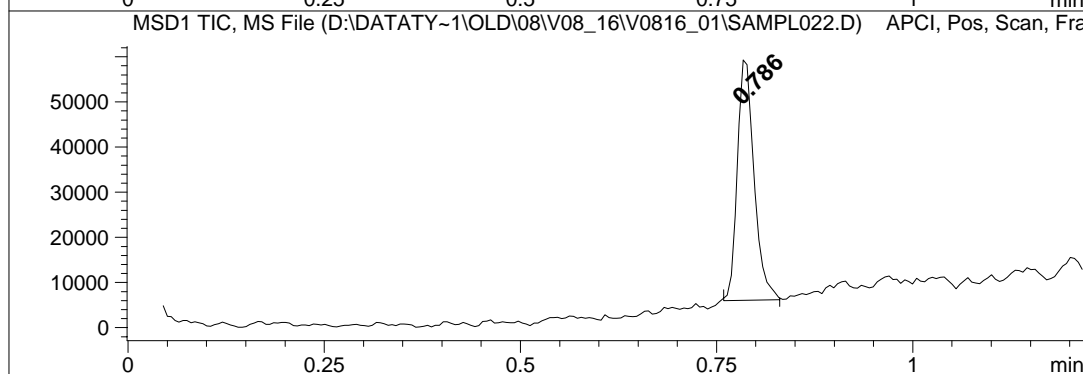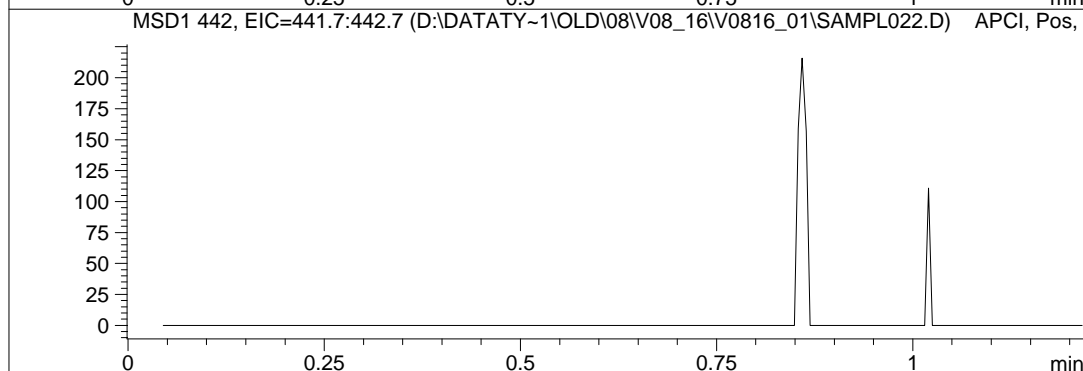

RT 0.786

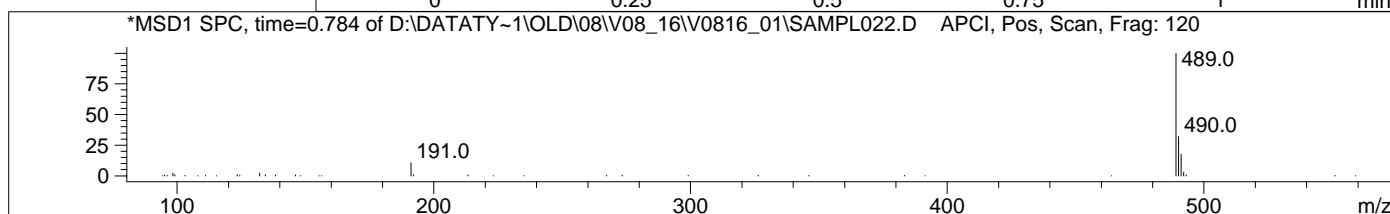

Supplement: data2 [file elife-70700-data2-v2.zip]

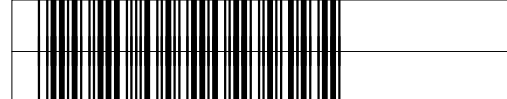

MaxPeak: 94.23%  
Ret\_Time: 0.682 min

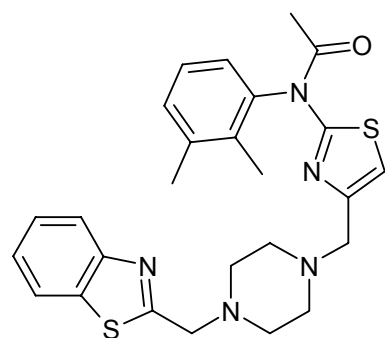

mw = 491.68

| # | Time  | Area% |
|---|-------|-------|
| 1 | 0.682 | 94.23 |
| 2 | 0.769 | 5.77  |

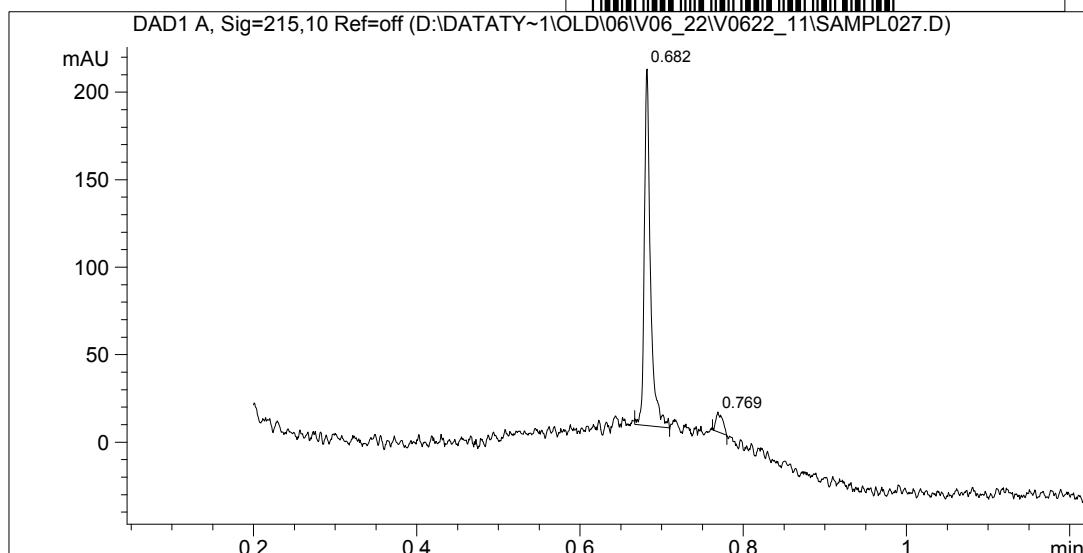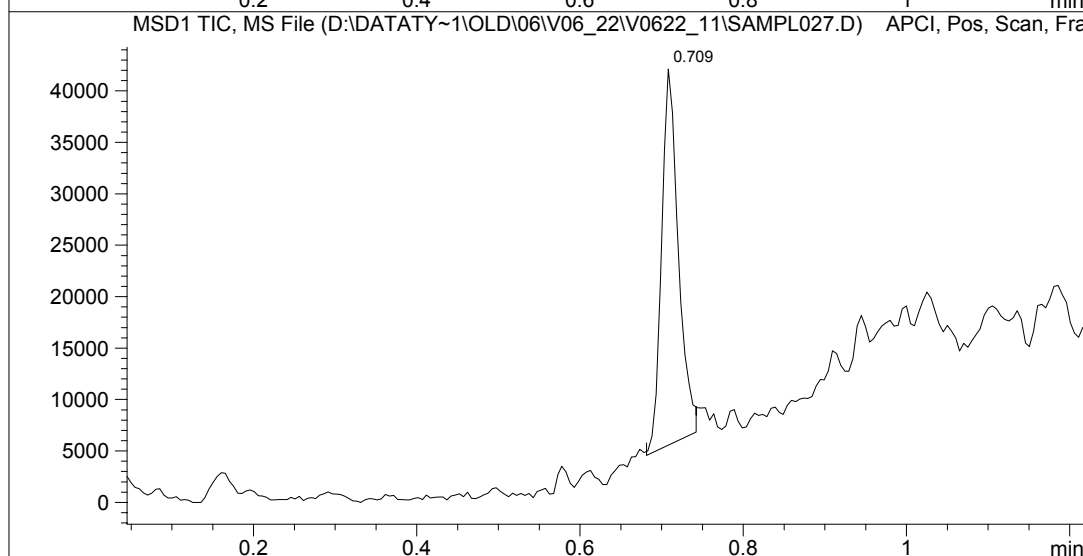

RT 0.709

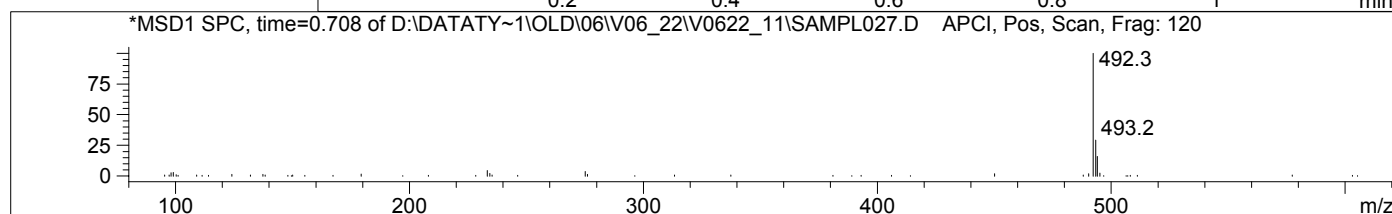

Supplement: data2 [file elife-70700-data2-v2.zip]

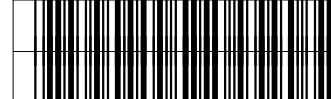

MaxPeak: 93.74%  
Ret\_Time: 0.757 min

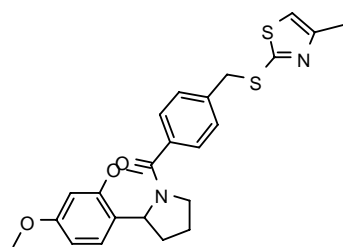

mw = 454,61

| # | Time  | Area% |
|---|-------|-------|
| 1 | 0.656 | 6.26  |
| 2 | 0.757 | 93.74 |

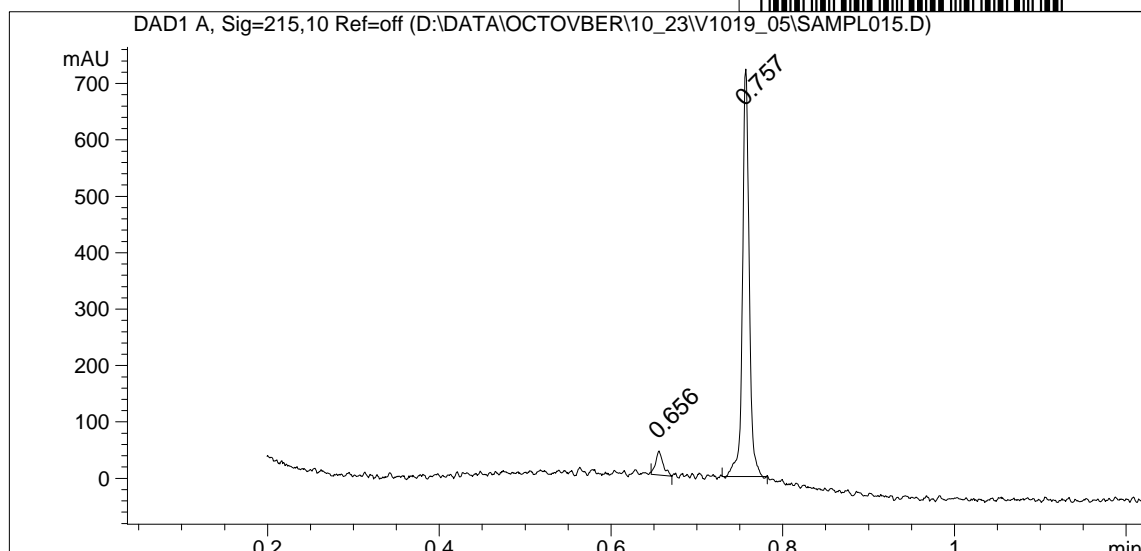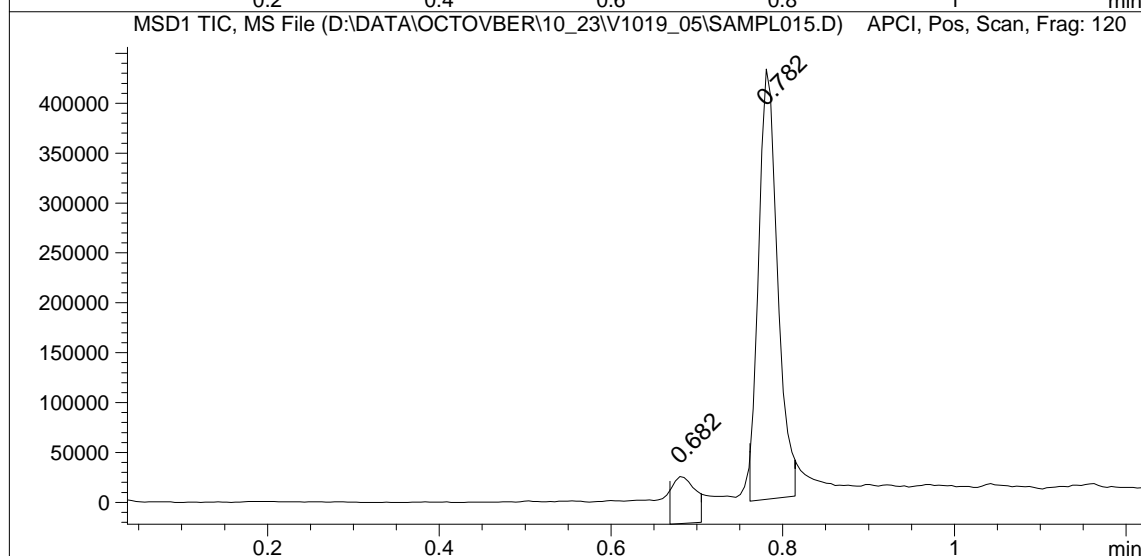

RT 0.682

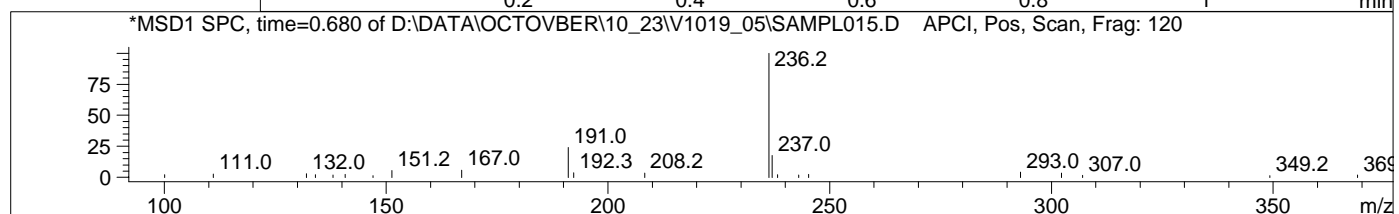

RT 0.782

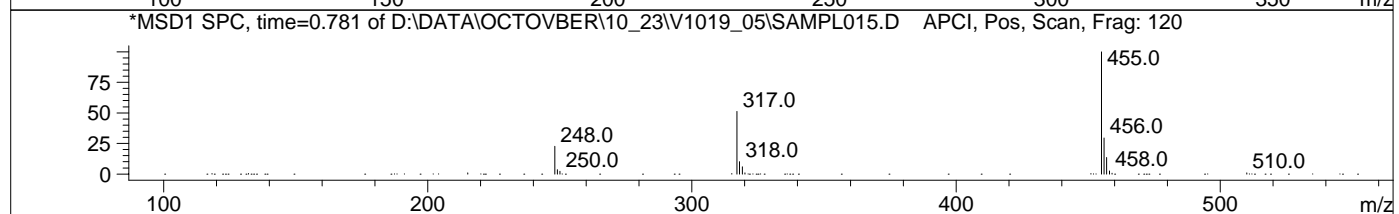

Supplement: data2 [file elife-70700-data2-v2.zip]

MaxPeak: 92.22%  
Ret\_Time: 1.193 min

2467071

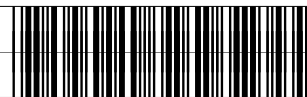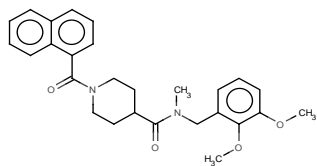

Mol Wt 446.538  
Exact Mass 446.26

| # | Time  | Area% |
|---|-------|-------|
| 1 | 0.849 | 1.26  |
| 2 | 0.894 | 1.31  |
| 3 | 1.156 | 1.60  |
| 4 | 1.193 | 92.22 |
| 5 | 1.215 | 2.08  |
| 6 | 1.250 | 1.54  |

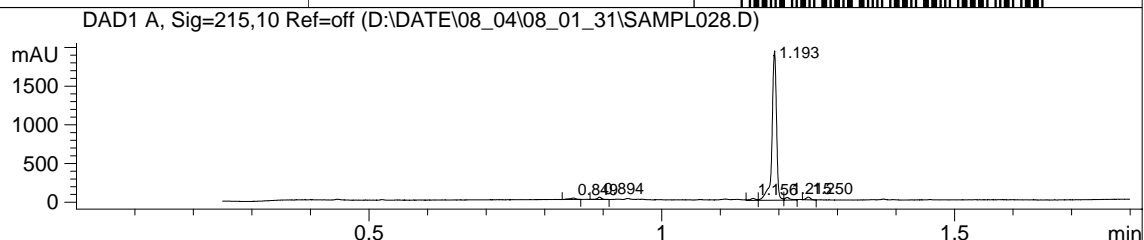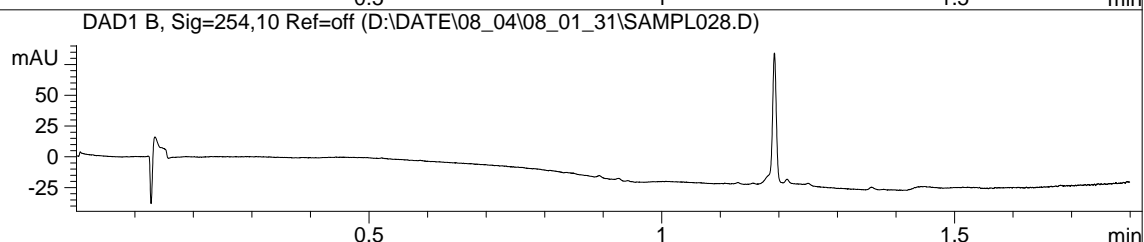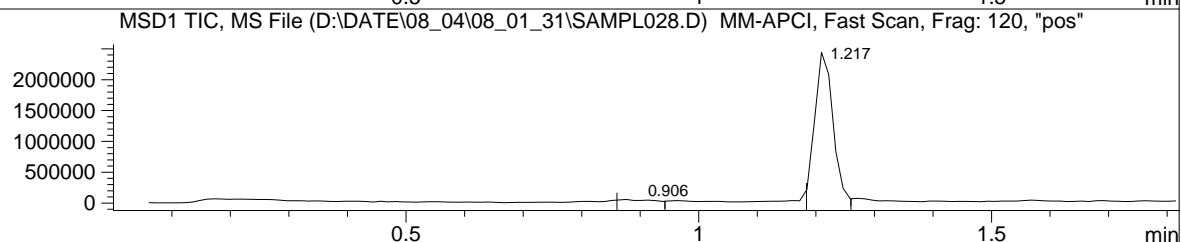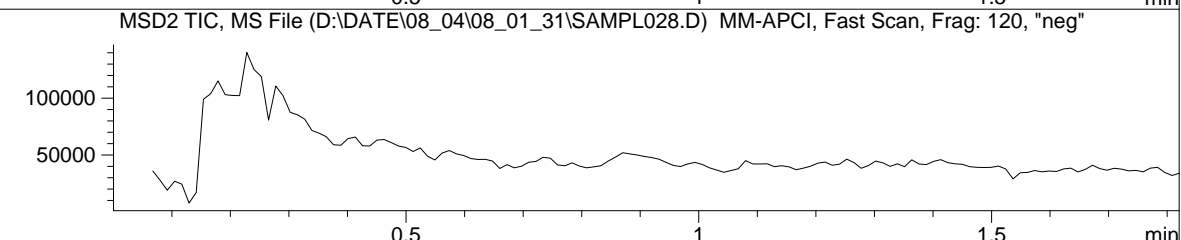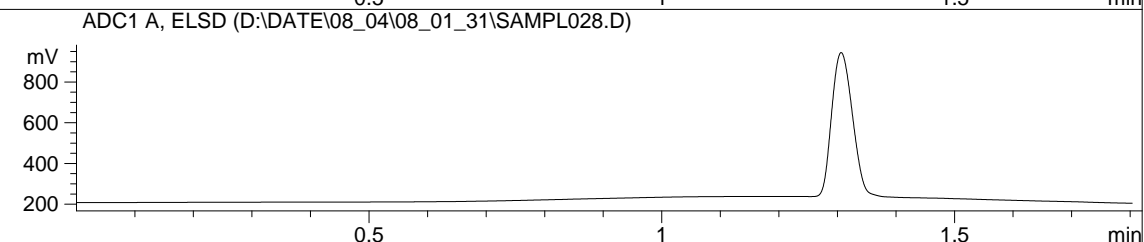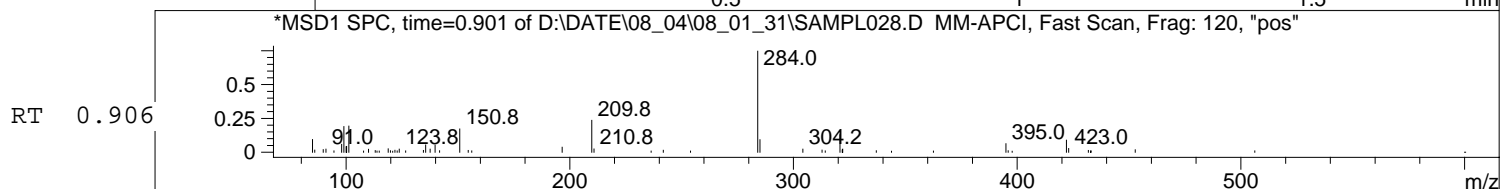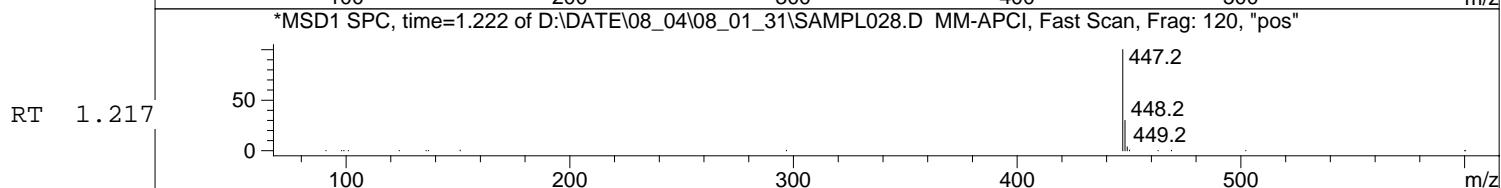

Supplement: data2 [file elife-70700-data2-v2.zip]

MaxPeak: 94.58%  
Ret\_Time: 1.134 min

3083495

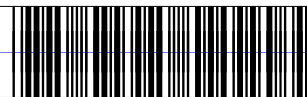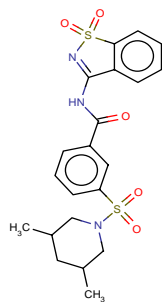

Mol Wt 461.554  
Exact Mass 461.12

| # | Time  | Area% |
|---|-------|-------|
| 1 | 0.303 | 2.67  |
| 2 | 1.053 | 2.74  |
| 3 | 1.134 | 94.58 |

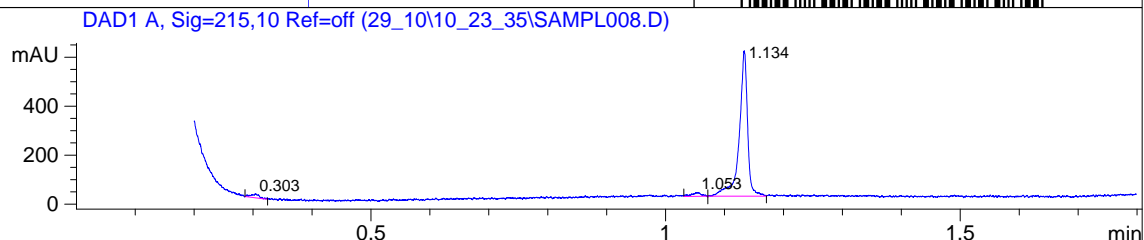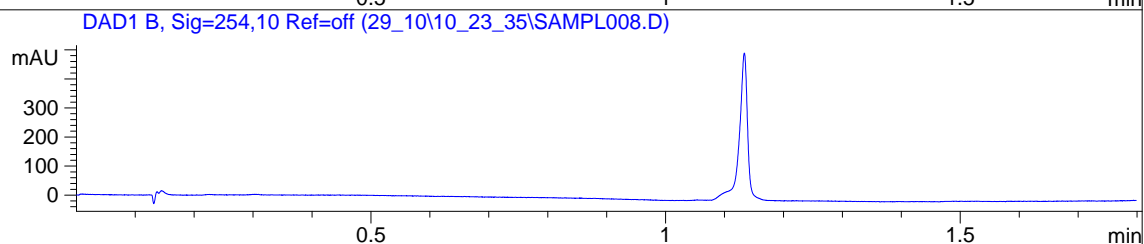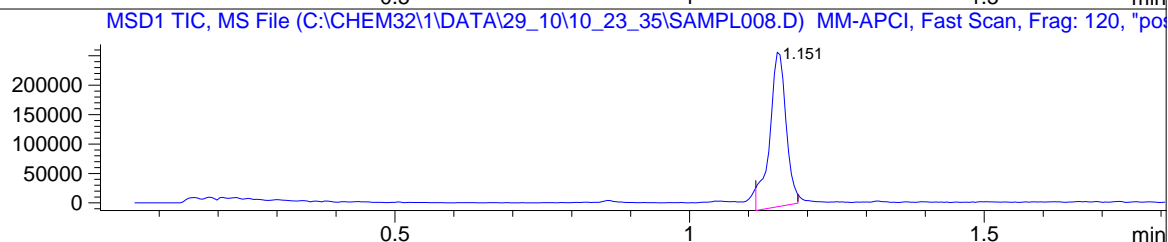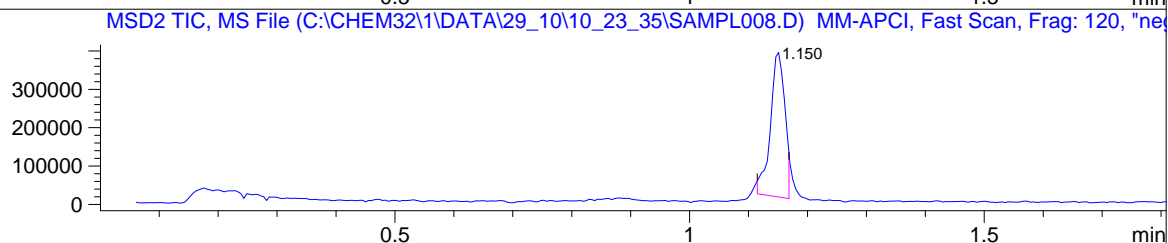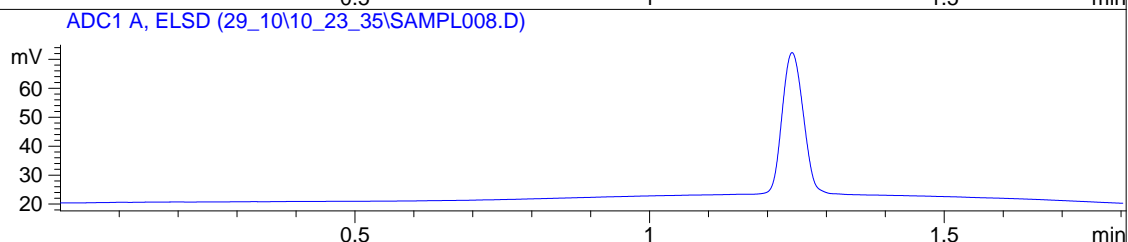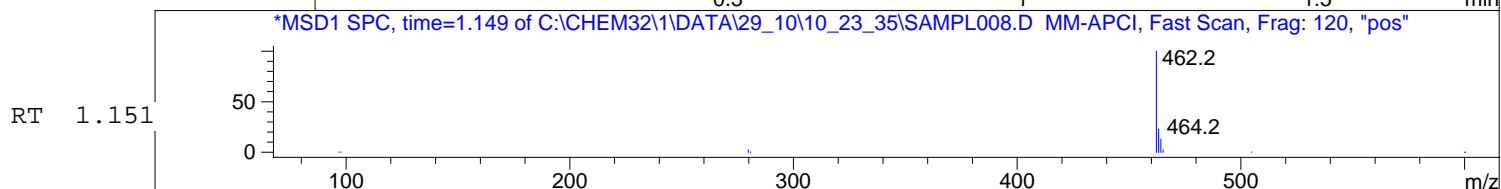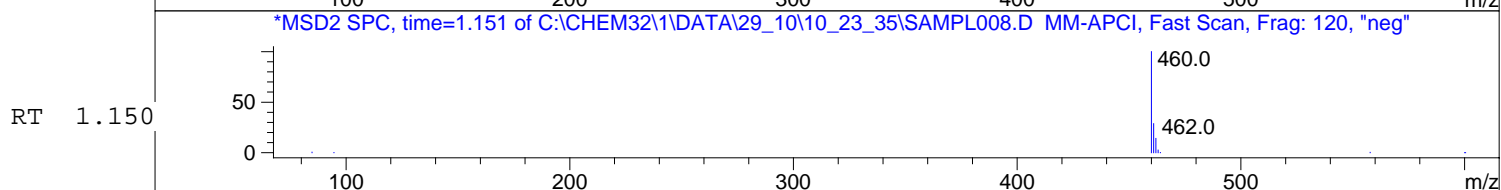

Supplement: data2 [file elife-70700-data2-v2.zip]

MaxPeak: 100.00%  
Ret\_Time: 0.980 min

2681079

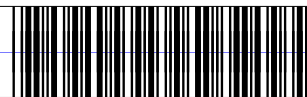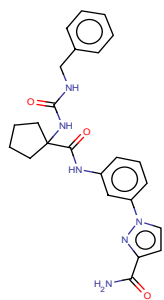

Mol Wt 446.502  
Exact Mass 446.23

| # | Time  | Area%  |
|---|-------|--------|
| 1 | 0.980 | 100.00 |

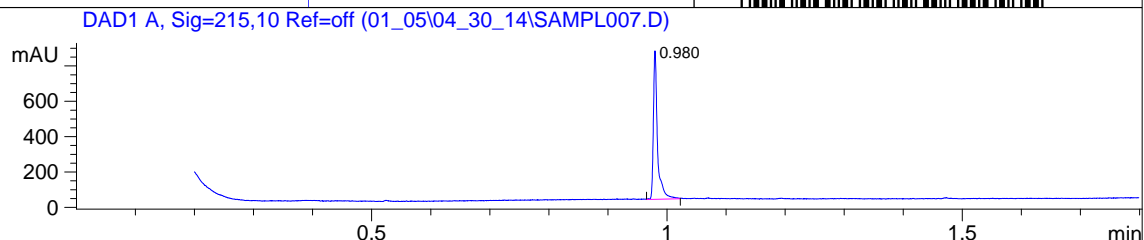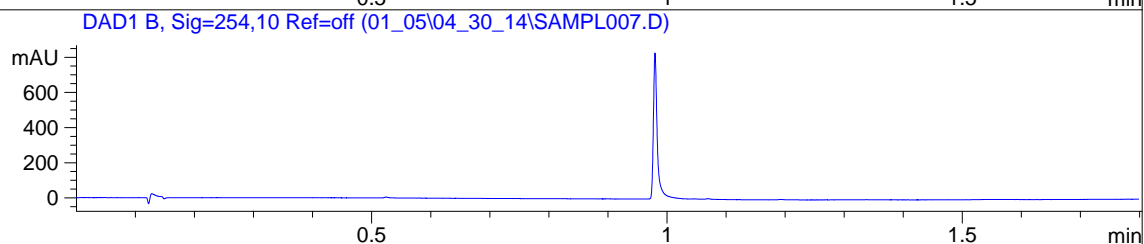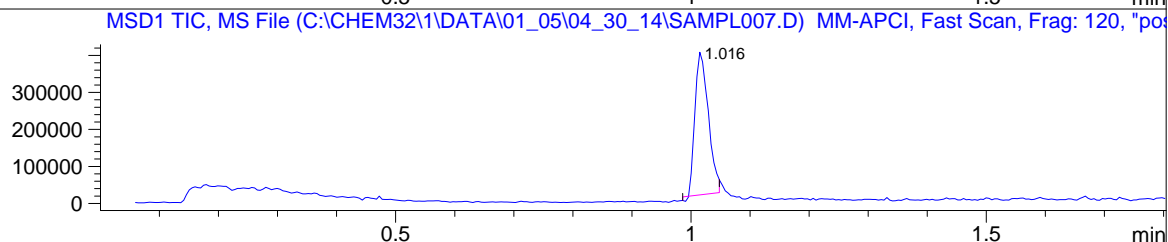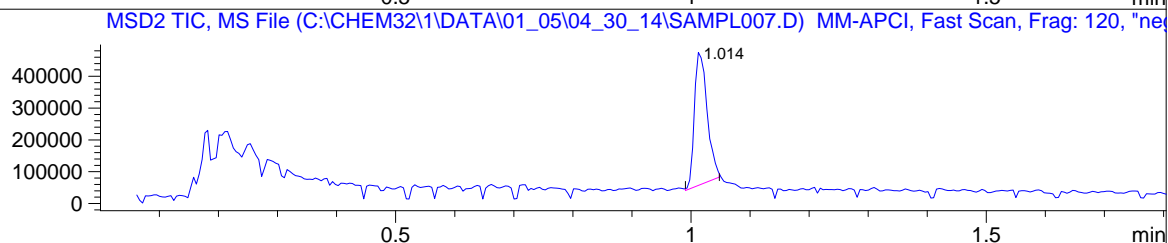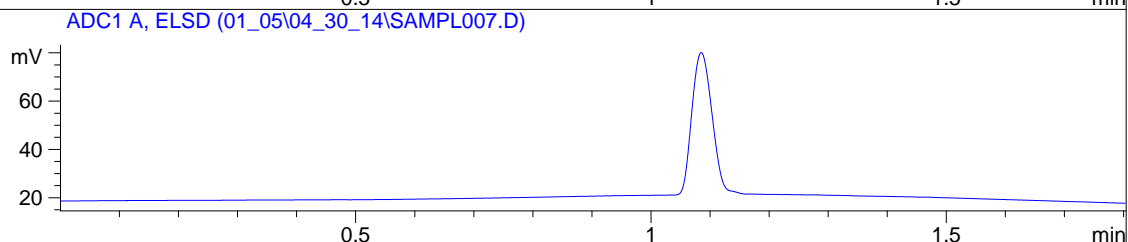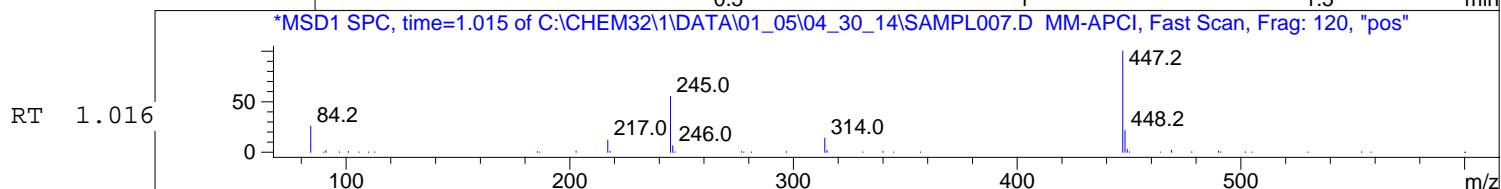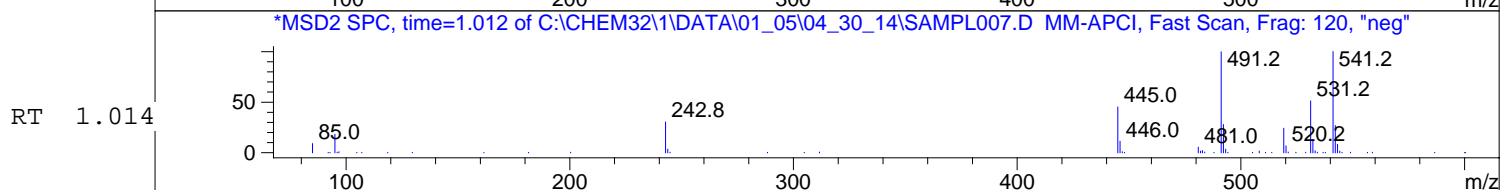

Supplement: data2 [file elife-70700-data2-v2.zip]

MaxPeak: 95.15%  
Ret\_Time: 0.701 min

1831447

OK

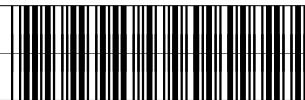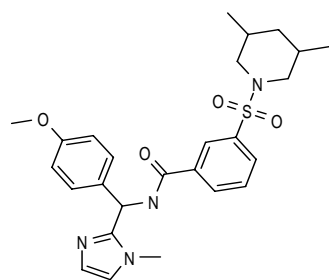

mw = 496.63

| # | Time  | Area% |
|---|-------|-------|
| 1 | 0.701 | 95.15 |
| 2 | 0.804 | 4.85  |

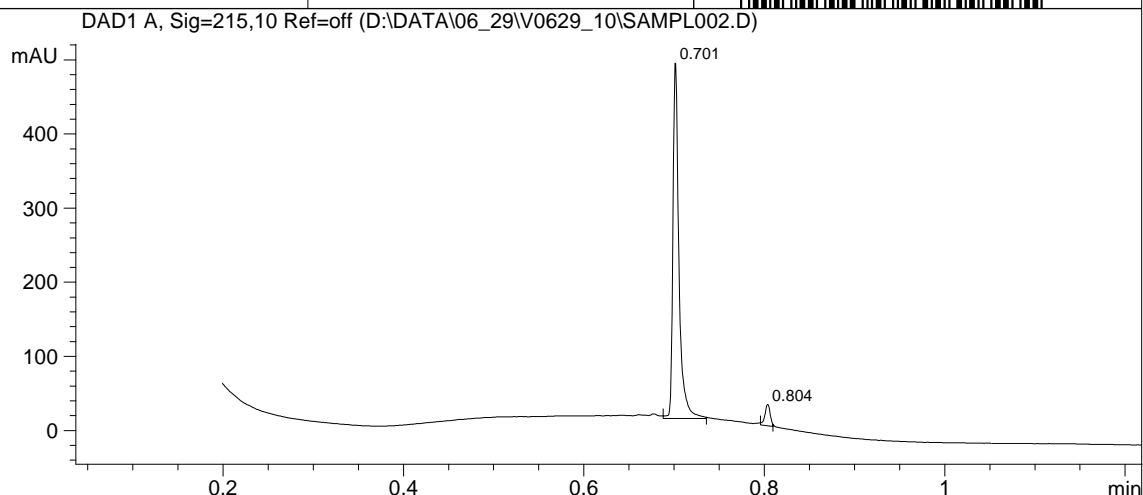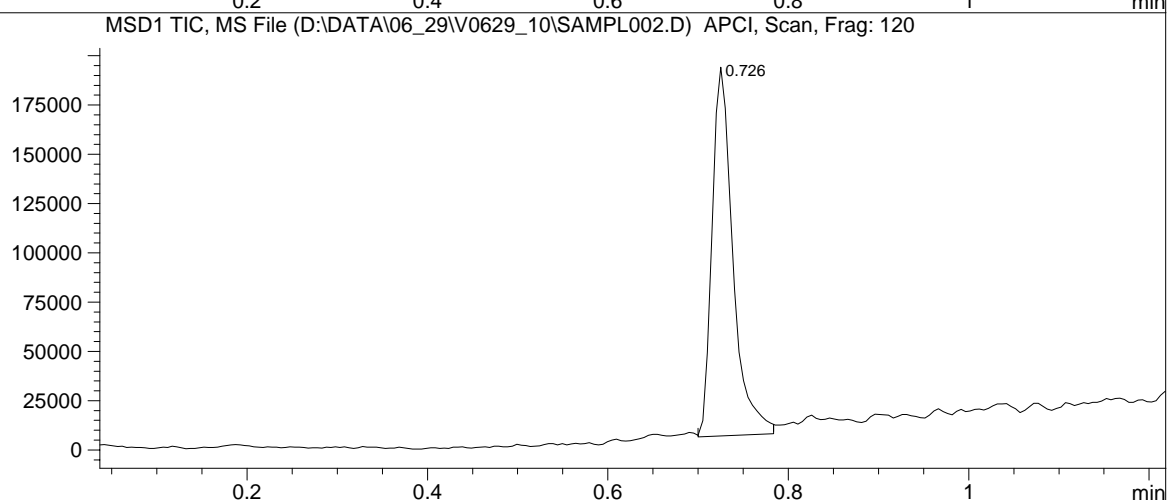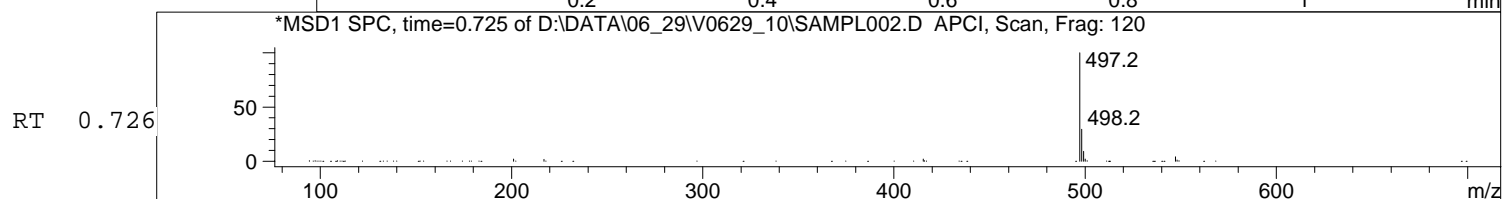

RT 0.726

Supplement: data2 [file elife-70700-data2-v2.zip]

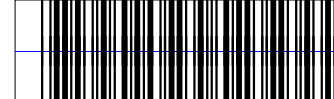

MaxPeak: 92.71%  
Ret\_Time: 0.673 min

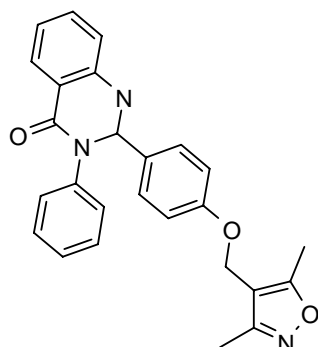

mw = 425,49

| # | Time  | Area% |
|---|-------|-------|
| 1 | 0.619 | 4.45  |
| 2 | 0.673 | 92.71 |
| 3 | 0.698 | 2.84  |

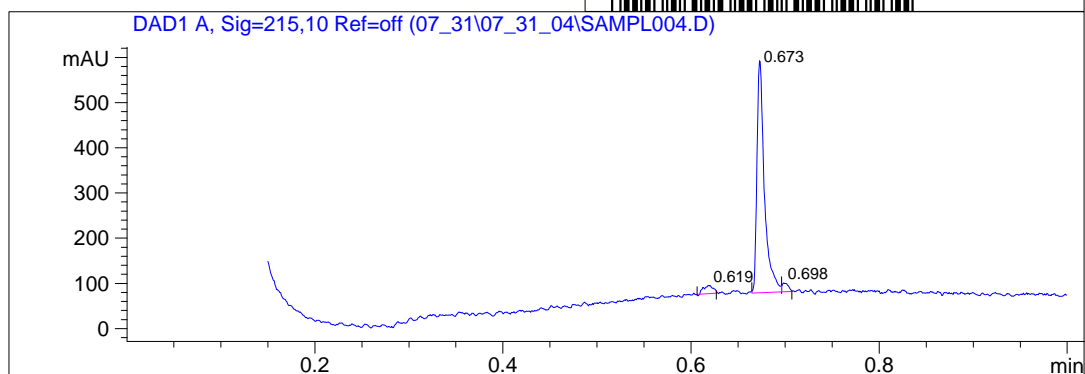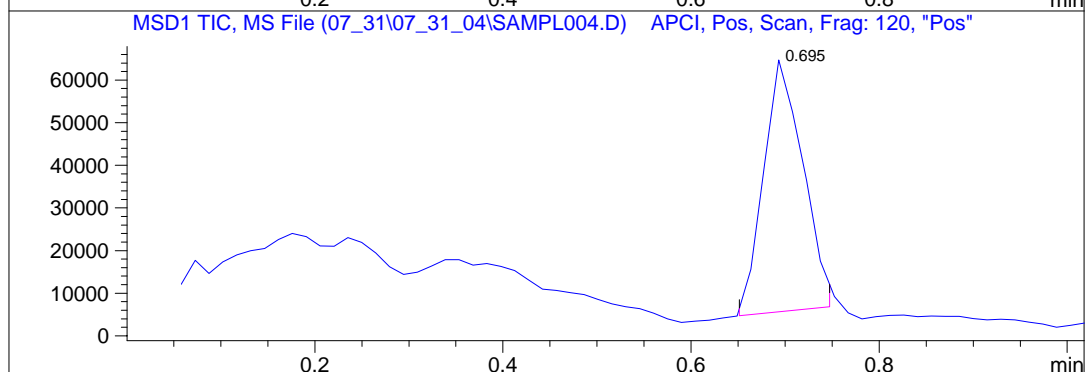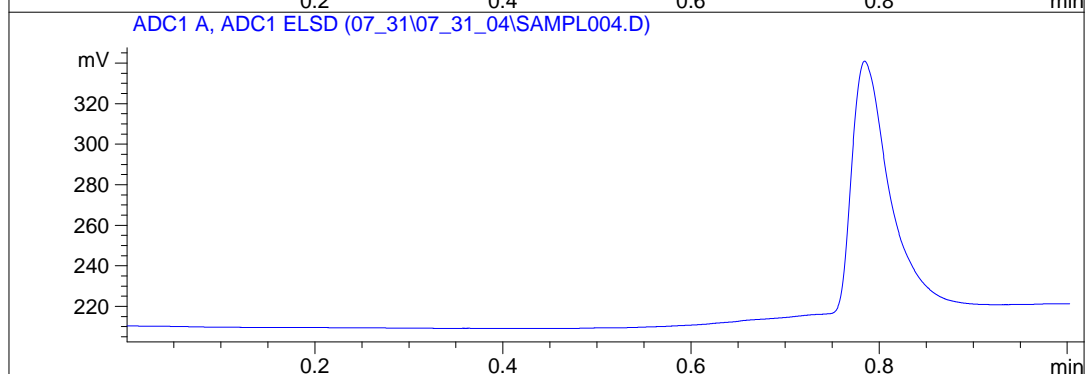

RT 0.695

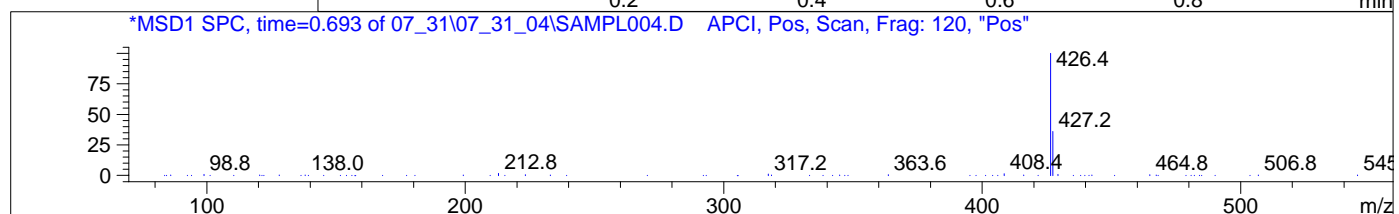

Supplement: data2 [file elife-70700-data2-v2.zip]
